# Supplementary material for: Comparative Transcriptome Analysis Reveals Molecular Defensive Mechanism of Arachis hypogaea in Response to Salt Stress
Source: Int J Genomics. 2020 Feb 26;2020:6524093. doi: 10.1155/2020/6524093 (PMC7063224; doi:10.1155/2020/6524093)
Supplement: Supplementary 1 — Supplementary Table S1: the DEGs identified in response to salt tolerance. [file 6524093.f1.xlsx]

## Sheet: Sheet1
Gene ID	CKR_count	HSR_count	CKR	HSR	logFC	Pvalue	FDR	Symbol	Description	GO Component	GO Function	GO Process	KEGG_A_class	KEGG_B_class	Pathway	K_ID
Aradu.00EZV	82.1433	361.607	3.33	13.5033	2.01972	9.10974e-26	1.08317e-24	Aradu.00EZV	glycerol-3-phosphate acyltransferase 5	-	-	GO:0008152//metabolic process	Metabolism	Lipid metabolism	ko00564//Glycerophospholipid metabolism;ko00561//Glycerolipid metabolism	K13508
Aradu.0124J	8.00667	1723.64	0.296667	58.4167	7.62139	0	0	Aradu.0124J	Uncharacterised conserved protein UCP015417, Vwa	-	-	-	-	-	-	-
Aradu.013F5	1.93333	8.57	0.126667	0.516667	2.0282	0.00145676	0.00398463	Aradu.013F5	germin-like protein 2	-	GO:0045735//nutrient reservoir activity;GO:0043167//ion binding;GO:0005488//binding;GO:0043169//cation binding;GO:0046914//transition metal ion binding;GO:0046872//metal ion binding;GO:0030145//manganese ion binding	-	-	-	-	-
Aradu.019PN	99.14	3118.37	3.31333	94.6533	4.8363	0	0	Aradu.019PN	FAD dependent oxidoreductase	-	-	-	-	-	-	-
Aradu.01B4C	508.67	115.157	95.4667	20.03	-2.25283	3.19774e-111	1.89265e-109	Aradu.01B4C	PREDICTED: transcription factor Bhlh93-like	-	GO:0005515//protein binding;GO:0005488//binding;GO:0046983//protein dimerization activity	-	-	-	-	-
Aradu.023N4	18.87	296.303	0.87	12.5633	3.85206	3.83045e-134	2.94198e-132	Aradu.023N4	basic helix-loop-helix (bHLH) DNA-binding superfamily protein	-	GO:0046983//protein dimerization activity;GO:0005488//binding;GO:0005515//protein binding	-	-	-	-	-
Aradu.033W0	9.31	1.69	0.296667	0.0533333	-2.47573	0.000580191	0.00169089	Aradu.033W0	PREDICTED: uncharacterized protein At1g04910-like isoform X2	-	-	-	-	-	-	-
Aradu.03P72	1.33333	39.3333	0.126667	3.45667	4.77027	2.31354e-20	2.23494e-19	Aradu.03P72	PREDICTED: uncharacterized protein LOC102667487 isoform X2	-	-	-	-	-	-	-
Aradu.05WJ3	10.2467	2.33333	0.503333	0.103333	-2.28421	6.37343e-05	0.000212743	Aradu.05WJ3	Cysteine/Histidine-rich C1 domain family protein	-	GO:0005488//binding;GO:0043169//cation binding;GO:0005515//protein binding;GO:0016491//oxidoreductase activity;GO:0008270//zinc ion binding;GO:0016667//oxidoreductase activity, acting on a sulfur group of donors;GO:0046914//transition metal ion binding;GO:0047134//protein-disulfide reductase activity;GO:0003824//catalytic activity;GO:0016668//oxidoreductase activity, acting on a sulfur group of d…	GO:0055114//oxidation-reduction process;GO:0044710//single-organism metabolic process;GO:0008152//metabolic process;GO:0044699//single-organism process	-	-	-	-
Aradu.06GAS	5.98667	33.13	0.24	1.23667	2.36535	4.17314e-10	2.29077e-09	Aradu.06GAS	receptor-like protein kinase 4	-	GO:0003824//catalytic activity;GO:0016301//kinase activity;GO:0016773//phosphotransferase activity, alcohol group as acceptor;GO:0004672//protein kinase activity;GO:0016740//transferase activity;GO:0016772//transferase activity, transferring phosphorus-containing groups	GO:0006793//phosphorus metabolic process;GO:0008152//metabolic process;GO:0036211//protein modification process;GO:0043170//macromolecule metabolic process;GO:0044237//cellular metabolic process;GO:0006464//cellular protein modification process;GO:0044238//primary metabolic process;GO:0016310//phosphorylation;GO:0044260//cellular macromolecule metabolic process;GO:0006468//protein phosphorylation…	-	-	-	-
Aradu.06HG0	261.277	56.18	12.38	2.45333	-2.3352	1.95885e-33	2.97311e-32	Aradu.06HG0	Glycerophosphodiester phosphodiesterase GDE1	-	GO:0003824//catalytic activity;GO:0042578//phosphoric ester hydrolase activity;GO:0008081//phosphoric diester hydrolase activity;GO:0016788//hydrolase activity, acting on ester bonds;GO:0008889//glycerophosphodiester phosphodiesterase activity;GO:0016787//hydrolase activity	GO:0006066//alcohol metabolic process;GO:0044238//primary metabolic process;GO:0044699//single-organism process;GO:0008152//metabolic process;GO:0044710//single-organism metabolic process;GO:0009987//cellular process;GO:0019400//alditol metabolic process;GO:0044763//single-organism cellular process;GO:0044281//small molecule metabolic process;GO:0006071//glycerol metabolic process;GO:0071704//org…	Metabolism	Lipid metabolism	ko00564//Glycerophospholipid metabolism	K18696
Aradu.06Y10	0	38.49	0.001	2.92	11.5118	1.90048e-30	2.65493e-29	Aradu.06Y10	PREDICTED: expansin-like B1-like	GO:0005576//extracellular region	-	-	-	-	-	-
Aradu.083WP	9.33333	110.667	0.333333	3.58	3.42492	1.07462e-45	2.22026e-44	Aradu.083WP	Protein kinase superfamily protein	-	GO:0016773//phosphotransferase activity, alcohol group as acceptor;GO:0005488//binding;GO:0001882//nucleoside binding;GO:1901265//nucleoside phosphate binding;GO:0000166//nucleotide binding;GO:0030554//adenyl nucleotide binding;GO:0043168//anion binding;GO:0016740//transferase activity;GO:0035639//purine ribonucleoside triphosphate binding;GO:0004672//protein kinase activity;GO:0017076//purine nu…	GO:0007154//cell communication;GO:0044763//single-organism cellular process;GO:0006464//cellular protein modification process;GO:0019538//protein metabolic process;GO:0006796//phosphate-containing compound metabolic process;GO:0032501//multicellular organismal process;GO:0044699//single-organism process;GO:0044267//cellular protein metabolic process;GO:0044238//primary metabolic process;GO:004470…	-	-	-	-
Aradu.08GFU	6.66667	63.3367	0.443333	3.84333	3.11589	2.26061e-28	2.94084e-27	Aradu.08GFU	NAC domain protein	-	GO:0003676//nucleic acid binding;GO:1901363//heterocyclic compound binding;GO:0003677//DNA binding;GO:0097159//organic cyclic compound binding;GO:0005488//binding	-	-	-	-	-
Aradu.08REY	406.8	16.3333	15.62	0.58	-4.7512	1.5384e-210	2.27273e-208	Aradu.08REY	ammonium transporter 1;2	GO:0016020//membrane	GO:0005215//transporter activity;GO:0015103//inorganic anion transmembrane transporter activity;GO:0008324//cation transmembrane transporter activity;GO:0022892//substrate-specific transporter activity;GO:0022891//substrate-specific transmembrane transporter activity;GO:0015101//organic cation transmembrane transporter activity;GO:0008519//ammonium transmembrane transporter activity;GO:0022857//t…	GO:0098661//inorganic anion transmembrane transport;GO:0098655//cation transmembrane transport;GO:0098660//inorganic ion transmembrane transport;GO:0006811//ion transport;GO:0044765//single-organism transport;GO:0072488//ammonium transmembrane transport;GO:0098656//anion transmembrane transport;GO:1902578//single-organism localization;GO:0015696//ammonium transport;GO:0098662//inorganic cation tr…	-	-	-	-
Aradu.08UMR	10.6667	1	0.796667	0.0666667	-3.57894	1.1386e-05	4.16268e-05	Aradu.08UMR	ovate family protein 6	-	-	-	-	-	-	-
Aradu.08Y2X	19.18	3.32	0.756667	0.126667	-2.57862	1.16299e-06	4.72925e-06	Aradu.08Y2X	sugar porter (SP) family MFS transporter	GO:0031224//intrinsic component of membrane;GO:0016020//membrane;GO:0016021//integral component of membrane;GO:0044425//membrane part	GO:0022892//substrate-specific transporter activity;GO:0022857//transmembrane transporter activity;GO:0005215//transporter activity;GO:0022891//substrate-specific transmembrane transporter activity	GO:0055085//transmembrane transport;GO:0006810//transport;GO:0009987//cellular process;GO:0044763//single-organism cellular process;GO:0051179//localization;GO:0051234//establishment of localization;GO:1902578//single-organism localization;GO:0044699//single-organism process;GO:0044765//single-organism transport	-	-	-	-
Aradu.098FP	9	1.66667	0.39	0.0633333	-2.62244	8.83467e-05	0.0002897	Aradu.098FP	PREDICTED: serine/threonine-protein phosphatase 7 long form homolog	-	-	-	-	-	-	-
Aradu.0AU5N	1.15667	10.48	0.436667	3.68	3.0751	1.68621e-05	6.0428e-05	Aradu.0AU5N	Serine protease inhibitor n	-	-	-	-	-	-	-
Aradu.0B0KP	23.93	5.66	1.24667	0.28	-2.15458	1.56996e-07	6.95054e-07	Aradu.0B0KP	SPFH/Band 7/PHB domain-containing membrane-associated protein family	GO:0016020//membrane	-	-	-	-	-	-
Aradu.0BT33	4.13	43.6267	0.84	8.15333	3.27893	2.63404e-16	2.11414e-15	Aradu.0BT33	PREDICTED: putative Myb family transcription factor At1g14600-like isoform X2	-	GO:1901363//heterocyclic compound binding;GO:0003676//nucleic acid binding;GO:0005488//binding;GO:0044877//macromolecular complex binding;GO:0003682//chromatin binding;GO:0097159//organic cyclic compound binding;GO:0003677//DNA binding	-	-	-	-	-
Aradu.0C9TU	69.1333	415.93	2.19667	12.1733	2.47034	2.44881e-88	1.07792e-86	Aradu.0C9TU	NAD-dependent malic enzyme 1	-	GO:0016491//oxidoreductase activity;GO:1901363//heterocyclic compound binding;GO:0004470//malic enzyme activity;GO:0000166//nucleotide binding;GO:1901265//nucleoside phosphate binding;GO:0036094//small molecule binding;GO:0051287//NAD binding;GO:0050662//coenzyme binding;GO:0097159//organic cyclic compound binding;GO:0016615//malate dehydrogenase activity;GO:0004471//malate dehydrogenase (decarbo…	GO:0006108//malate metabolic process;GO:0009987//cellular process;GO:0044763//single-organism cellular process;GO:0006082//organic acid metabolic process;GO:0055114//oxidation-reduction process;GO:0044699//single-organism process;GO:0043648//dicarboxylic acid metabolic process;GO:0044237//cellular metabolic process;GO:0071704//organic substance metabolic process;GO:0044710//single-organism metabo…	Metabolism	Global and Overview;Carbohydrate metabolism;Energy metabolism	ko01200//Carbon metabolism;ko00620//Pyruvate metabolism;ko00710//Carbon fixation in photosynthetic organisms	K00029
Aradu.0CJ3T	1	11.6667	0.03	0.33	3.45943	3.8281e-07	1.63331e-06	Aradu.0CJ3T	beta-galactosidase 15	-	-	GO:0044238//primary metabolic process;GO:0008152//metabolic process;GO:0071704//organic substance metabolic process;GO:0005975//carbohydrate metabolic process	-	-	-	-
Aradu.0G0TP	63.71	311.493	2.42	10.74	2.14992	6.64613e-53	1.59027e-51	Aradu.0G0TP	O-methyltransferase 1	-	GO:0005515//protein binding;GO:0008168//methyltransferase activity;GO:0016740//transferase activity;GO:0003824//catalytic activity;GO:0016741//transferase activity, transferring one-carbon groups;GO:0046983//protein dimerization activity;GO:0005488//binding;GO:0008171//O-methyltransferase activity	-	-	-	-	-
Aradu.0GB26	538.923	2612.51	18.41	81.87	2.15285	5.30227e-152	4.87487e-150	Aradu.0GB26	sugar transporter protein 7	GO:0016020//membrane;GO:0031224//intrinsic component of membrane;GO:0044425//membrane part;GO:0016021//integral component of membrane	GO:0005215//transporter activity;GO:0022892//substrate-specific transporter activity;GO:0022857//transmembrane transporter activity;GO:0022891//substrate-specific transmembrane transporter activity	GO:0044765//single-organism transport;GO:0006810//transport;GO:0055085//transmembrane transport;GO:0044699//single-organism process;GO:0051234//establishment of localization;GO:0051179//localization;GO:0009987//cellular process;GO:0044763//single-organism cellular process;GO:1902578//single-organism localization	-	-	-	-
Aradu.0H703	1965.64	83.03	62.6833	2.44667	-4.67919	0	0	Aradu.0H703	polygalacturonase 4	-	GO:0004553//hydrolase activity, hydrolyzing O-glycosyl compounds;GO:0004650//polygalacturonase activity;GO:0016798//hydrolase activity, acting on glycosyl bonds;GO:0016787//hydrolase activity;GO:0003824//catalytic activity	GO:0071704//organic substance metabolic process;GO:0044238//primary metabolic process;GO:0008152//metabolic process;GO:0005975//carbohydrate metabolic process	-	-	-	-
Aradu.0J3SA	40.7667	3056.12	5.17333	356.197	6.10544	0	0	Aradu.0J3SA	disease-resistance response protein	-	-	GO:0009607//response to biotic stimulus;GO:0050896//response to stimulus;GO:0006950//response to stress;GO:0006952//defense response	-	-	-	-
Aradu.0K49H	518.897	29.3367	9.29333	0.493333	-4.23556	6.45688e-112	3.85423e-110	Aradu.0K49H	Potassium transporter family protein	GO:0016020//membrane	GO:0005215//transporter activity;GO:0022857//transmembrane transporter activity;GO:0022891//substrate-specific transmembrane transporter activity;GO:0008324//cation transmembrane transporter activity;GO:0046873//metal ion transmembrane transporter activity;GO:0022892//substrate-specific transporter activity;GO:0022890//inorganic cation transmembrane transporter activity;GO:0015075//ion transmembr…	GO:0044763//single-organism cellular process;GO:0006813//potassium ion transport;GO:0071804//cellular potassium ion transport;GO:0098662//inorganic cation transmembrane transport;GO:0006812//cation transport;GO:0044699//single-organism process;GO:0051234//establishment of localization;GO:0098655//cation transmembrane transport;GO:0051179//localization;GO:0098660//inorganic ion transmembrane trans…	-	-	-	-
Aradu.0M1UL	109.333	599.36	11.9833	60.7367	2.34154	1.35999e-69	4.44007e-68	Aradu.0M1UL	Unknown protein	-	-	-	-	-	-	-
Aradu.0N518	108	27.3333	39.4167	9.04	-2.12441	1.94907e-25	2.29266e-24	Aradu.0N518	ralf-like 34	-	-	-	-	-	-	-
Aradu.0P7PW	7.03667	0.35	0.183333	0.00666667	-4.78136	3.24571e-05	0.000112235	Aradu.0P7PW	PREDICTED: uncharacterized protein LOC100796503 isoform X1	-	-	-	-	-	-	-
Aradu.0Q8WY	6.66667	1.66667	0.446667	0.103333	-2.11189	0.00335734	0.00861981	Aradu.0Q8WY	PREDICTED: protein pelota-like	-	-	-	Genetic Information Processing	Translation	ko03015//mRNA surveillance pathway	K06965
Aradu.0RF9R	1.87667	26.7967	0.15	1.97333	3.7176	7.96711e-15	5.92413e-14	Aradu.0RF9R	photosystem II protein D1	-	GO:0009055//electron carrier activity	GO:0044763//single-organism cellular process;GO:0009767//photosynthetic electron transport chain;GO:0019684//photosynthesis, light reaction;GO:0008152//metabolic process;GO:0044710//single-organism metabolic process;GO:0044699//single-organism process;GO:0006091//generation of precursor metabolites and energy;GO:0009772//photosynthetic electron transport in photosystem II;GO:0015979//photosynthes…	Metabolism	Energy metabolism	ko00195//Photosynthesis	K02703
Aradu.0RG1D	41.51	267.723	1.64667	9.78	2.57029	1.94709e-78	7.35626e-77	Aradu.0RG1D	Regulator of Vps4 activity in the MVB pathway protein	-	-	-	Cellular Processes	Transport and catabolism	ko04144//Endocytosis	K19476
Aradu.0SV2V	174.4	36.2	6.08333	1.14	-2.41583	1.24035e-35	1.98085e-34	Aradu.0SV2V	receptor-like protein kinase 2	-	GO:0005515//protein binding;GO:0005488//binding	-	-	-	-	-
Aradu.0U1AX	1	6.04333	0.02	0.116667	2.54432	0.00372406	0.00947392	Aradu.0U1AX	plasma membrane H+-ATPase	GO:0016020//membrane;GO:0044425//membrane part;GO:0031224//intrinsic component of membrane;GO:0016021//integral component of membrane	GO:0046872//metal ion binding;GO:0016818//hydrolase activity, acting on acid anhydrides, in phosphorus-containing anhydrides;GO:0043169//cation binding;GO:0016817//hydrolase activity, acting on acid anhydrides;GO:0008324//cation transmembrane transporter activity;GO:0097159//organic cyclic compound binding;GO:0016787//hydrolase activity;GO:0022804//active transmembrane transporter activity;GO:190…	GO:0006793//phosphorus metabolic process;GO:0009127//purine nucleoside monophosphate biosynthetic process;GO:0006811//ion transport;GO:0006796//phosphate-containing compound metabolic process;GO:0009156//ribonucleoside monophosphate biosynthetic process;GO:0009167//purine ribonucleoside monophosphate metabolic process;GO:0009206//purine ribonucleoside triphosphate biosynthetic process;GO:0046483/…	Metabolism	Energy metabolism	ko00190//Oxidative phosphorylation	K01535
Aradu.0VN2L	122.99	25.9367	6.89	1.31	-2.39494	2.34053e-38	4.02979e-37	Aradu.0VN2L	nodulin MtN21 /EamA-like transporter family protein	GO:0016020//membrane	-	-	-	-	-	-
Aradu.0W0HH	0	4.94667	0.001	0.236667	7.88671	0.000201197	0.000627066	Aradu.0W0HH	RNA-binding ASCH domain protein	-	-	-	-	-	-	-
Aradu.0X3DX	13.8033	2264.08	1.79	267.97	7.22597	0	0	Aradu.0X3DX	disease-resistance response protein	-	-	GO:0006952//defense response;GO:0009607//response to biotic stimulus;GO:0050896//response to stimulus;GO:0006950//response to stress	-	-	-	-
Aradu.0X4JL	2	19.8767	0.0933333	0.863333	3.20945	2.80976e-08	1.33504e-07	Aradu.0X4JL	MatK/TrnK amino terminal region protein	-	-	GO:0044237//cellular metabolic process;GO:0006397//mRNA processing;GO:0044260//cellular macromolecule metabolic process;GO:0016070//RNA metabolic process;GO:0010467//gene expression;GO:0009987//cellular process;GO:0008152//metabolic process;GO:1901360//organic cyclic compound metabolic process;GO:0090304//nucleic acid metabolic process;GO:0006396//RNA processing;GO:0071704//organic substance meta…	-	-	-	-
Aradu.0X4TI	6.64333	39.93	0.146667	0.81	2.46538	1.33144e-14	9.75894e-14	Aradu.0X4TI	calcium dependent protein kinase 1	-	GO:0016772//transferase activity, transferring phosphorus-containing groups;GO:0004674//protein serine/threonine kinase activity;GO:0043167//ion binding;GO:0017076//purine nucleotide binding;GO:0036094//small molecule binding;GO:0003824//catalytic activity;GO:0032550//purine ribonucleoside binding;GO:0032549//ribonucleoside binding;GO:0004672//protein kinase activity;GO:0005488//binding;GO:001677…	GO:0006793//phosphorus metabolic process;GO:0006464//cellular protein modification process;GO:0019538//protein metabolic process;GO:0044237//cellular metabolic process;GO:0043170//macromolecule metabolic process;GO:0006468//protein phosphorylation;GO:0006796//phosphate-containing compound metabolic process;GO:0043412//macromolecule modification;GO:0044260//cellular macromolecule metabolic process…	Organismal Systems	Environmental adaptation	ko04626//Plant-pathogen interaction	K13412
Aradu.0X68Q	0.666667	21.07	0.09	2.75333	4.93511	8.44959e-14	5.91302e-13	Aradu.0X68Q	PREDICTED: uncharacterized protein LOC100776716 isoform X2	-	-	-	-	-	-	-
Aradu.0Y40Q	101.643	554.097	3.86667	19.3233	2.32118	5.39382e-93	2.5342e-91	Aradu.0Y40Q	3-ketoacyl-CoA synthase 11	GO:0016020//membrane	GO:0003824//catalytic activity	GO:0044249//cellular biosynthetic process;GO:0008152//metabolic process;GO:0006633//fatty acid biosynthetic process;GO:0071704//organic substance metabolic process;GO:0006629//lipid metabolic process;GO:0044281//small molecule metabolic process;GO:0009058//biosynthetic process;GO:0044710//single-organism metabolic process;GO:0043436//oxoacid metabolic process;GO:0006082//organic acid metabolic pr…	Metabolism	Lipid metabolism	ko00062//Fatty acid elongation	K15397
Aradu.0Z207	34.0233	7.19667	2.29667	0.446667	-2.36227	5.64466e-11	3.28842e-10	Aradu.0Z207	myo-inositol oxygenase 4	GO:0005737//cytoplasm;GO:0005623//cell;GO:0005622//intracellular;GO:0044424//intracellular part;GO:0044464//cell part	GO:0016491//oxidoreductase activity;GO:0046872//metal ion binding;GO:0005506//iron ion binding;GO:0050113//inositol oxygenase activity;GO:0046914//transition metal ion binding;GO:0003824//catalytic activity;GO:0005488//binding;GO:0016701//oxidoreductase activity, acting on single donors with incorporation of molecular oxygen;GO:0043169//cation binding;GO:0043167//ion binding	GO:0009056//catabolic process;GO:0044281//small molecule metabolic process;GO:0006066//alcohol metabolic process;GO:0019310//inositol catabolic process;GO:0019751//polyol metabolic process;GO:0006020//inositol metabolic process;GO:0044724//single-organism carbohydrate catabolic process;GO:0008152//metabolic process;GO:1901615//organic hydroxy compound metabolic process;GO:0044238//primary metabol…	Metabolism	Carbohydrate metabolism	ko00562//Inositol phosphate metabolism;ko00053//Ascorbate and aldarate metabolism	K00469
Aradu.0Z2ZN	50.7	337.173	4.08333	24.9667	2.61218	3.48504e-96	1.71468e-94	Aradu.0Z2ZN	myb transcription factor	-	GO:0005488//binding;GO:1901363//heterocyclic compound binding;GO:0097159//organic cyclic compound binding;GO:0003677//DNA binding;GO:0003676//nucleic acid binding;GO:0003682//chromatin binding;GO:0044877//macromolecular complex binding	-	-	-	-	-
Aradu.0Z5GQ	75.88	390.56	25.1067	118.47	2.23838	2.08574e-85	8.78728e-84	Aradu.0Z5GQ	Unknown protein	-	-	-	-	-	-	-
Aradu.0ZG2X	215.333	52	11.1667	2.48	-2.17079	2.91809e-50	6.63635e-49	Aradu.0ZG2X	PREDICTED: UPF0481 protein At3g47200-like	-	-	-	-	-	-	-
Aradu.0ZM70	5.26667	38.85	0.23	1.57333	2.77412	1.11894e-13	7.77879e-13	Aradu.0ZM70	O-acyltransferase (WSD1-like) family protein	-	GO:0016411//acylglycerol O-acyltransferase activity;GO:0008374//O-acyltransferase activity;GO:0003824//catalytic activity;GO:0004144//diacylglycerol O-acyltransferase activity;GO:0016746//transferase activity, transferring acyl groups;GO:0016747//transferase activity, transferring acyl groups other than amino-acyl groups;GO:0016740//transferase activity	-	-	-	-	-
Aradu.10M4V	19.3333	87.9767	1.94333	8.07	2.05404	1.36566e-21	1.39381e-20	Aradu.10M4V	Wall-associated kinase family protein	-	GO:0030246//carbohydrate binding;GO:0030247//polysaccharide binding;GO:0001871//pattern binding;GO:0005488//binding	-	-	-	-	-
Aradu.10WEW	200.477	1260.84	7.47	43.14	2.52985	3.31135e-214	5.1217e-212	Aradu.10WEW	Cytochrome P450 superfamily protein	-	GO:1901363//heterocyclic compound binding;GO:0020037//heme binding;GO:0046914//transition metal ion binding;GO:0046872//metal ion binding;GO:0043169//cation binding;GO:0097159//organic cyclic compound binding;GO:0005506//iron ion binding;GO:0046906//tetrapyrrole binding;GO:0005488//binding;GO:0043167//ion binding	GO:0055114//oxidation-reduction process;GO:0008152//metabolic process;GO:0044699//single-organism process;GO:0044710//single-organism metabolic process	Metabolism	Metabolism of cofactors and vitamins;Biosynthesis of other secondary metabolites;Global and Overview;Amino acid metabolism	ko00940//Phenylpropanoid biosynthesis;ko00130//Ubiquinone and other terpenoid-quinone biosynthesis;ko00360//Phenylalanine metabolism;ko00941//Flavonoid biosynthesis;ko00945//Stilbenoid, diarylheptanoid and gingerol biosynthesis;ko01220//Degradation of aromatic compounds	K00487
Aradu.10YFJ	1.33333	10.6933	0.0266667	0.203333	2.93074	1.28595e-05	4.67147e-05	Aradu.10YFJ	PREDICTED: WD repeat-containing protein 44-like	-	GO:0005488//binding;GO:0005515//protein binding	-	-	-	-	-
Aradu.111NR	0.666667	5.53667	0.14	1.08667	2.95641	0.00192625	0.00516832	Aradu.111NR	Unknown protein	-	-	-	-	-	-	-
Aradu.1232H	47.5567	1568.12	4.33333	131.563	4.92414	0	0	Aradu.1232H	Glutathione S-transferase family protein	-	GO:0005488//binding;GO:0005515//protein binding	-	Metabolism	Metabolism of other amino acids	ko00480//Glutathione metabolism	K00799
Aradu.12EER	11.93	70.19	0.67	3.63333	2.43906	3.4233e-21	3.43132e-20	Aradu.12EER	carbonic anhydrase 1	-	GO:0046914//transition metal ion binding;GO:0008270//zinc ion binding;GO:0016829//lyase activity;GO:0016836//hydro-lyase activity;GO:0003824//catalytic activity;GO:0043167//ion binding;GO:0016835//carbon-oxygen lyase activity;GO:0043169//cation binding;GO:0004089//carbonate dehydratase activity;GO:0046872//metal ion binding;GO:0005488//binding	-	Metabolism	Energy metabolism	ko00910//Nitrogen metabolism	K01673
Aradu.12ETV	1.03	17.5933	0.0733333	1.15	3.97102	1.87631e-09	9.79091e-09	Aradu.12ETV	jasmonic acid carboxyl methyltransferase	-	GO:0008168//methyltransferase activity;GO:0003824//catalytic activity;GO:0016741//transferase activity, transferring one-carbon groups;GO:0016740//transferase activity	-	Metabolism	Lipid metabolism	ko00592//alpha-Linolenic acid metabolism	K08241
Aradu.12HYF	1.43	7.99667	0.0933333	0.5	2.42146	0.00108804	0.00303767	Aradu.12HYF	polygalacturonase 4	-	GO:0004553//hydrolase activity, hydrolyzing O-glycosyl compounds;GO:0003824//catalytic activity;GO:0016798//hydrolase activity, acting on glycosyl bonds;GO:0004650//polygalacturonase activity;GO:0016787//hydrolase activity	GO:0005975//carbohydrate metabolic process;GO:0008152//metabolic process;GO:0044238//primary metabolic process;GO:0071704//organic substance metabolic process	Metabolism	Carbohydrate metabolism	ko00500//Starch and sucrose metabolism;ko00040//Pentose and glucuronate interconversions	K01184
Aradu.12T0R	499.56	62.89	30.98	3.59	-3.10928	2.68005e-114	1.63998e-112	Aradu.12T0R	peroxidase 2	-	GO:0020037//heme binding;GO:0046906//tetrapyrrole binding;GO:0016684//oxidoreductase activity, acting on peroxide as acceptor;GO:0005488//binding;GO:0097159//organic cyclic compound binding;GO:0016209//antioxidant activity;GO:0003824//catalytic activity;GO:0004601//peroxidase activity;GO:1901363//heterocyclic compound binding;GO:0016491//oxidoreductase activity	GO:0006950//response to stress;GO:0055114//oxidation-reduction process;GO:0044699//single-organism process;GO:0044710//single-organism metabolic process;GO:0050896//response to stimulus;GO:0006979//response to oxidative stress;GO:0008152//metabolic process	Metabolism	Biosynthesis of other secondary metabolites	ko00940//Phenylpropanoid biosynthesis	K00430
Aradu.134RU	0.993333	7.66	0.0366667	0.253333	2.7885	0.00091861	0.00259309	Aradu.134RU	PREDICTED: uncharacterized protein LOC100797259 isoform X4	-	GO:0046914//transition metal ion binding;GO:0008270//zinc ion binding;GO:0005488//binding;GO:0043169//cation binding;GO:0043167//ion binding;GO:0046872//metal ion binding	-	-	-	-	-
Aradu.137AN	59.5267	10.96	2.12333	0.36	-2.56026	1.51011e-19	1.41439e-18	Aradu.137AN	CYCLIN D3	GO:0005634//nucleus;GO:0044464//cell part;GO:0005623//cell;GO:0043231//intracellular membrane-bounded organelle;GO:0043226//organelle;GO:0043227//membrane-bounded organelle;GO:0044424//intracellular part;GO:0043229//intracellular organelle;GO:0005622//intracellular	-	GO:0007049//cell cycle;GO:0044699//single-organism process;GO:0009987//cellular process;GO:0044763//single-organism cellular process	Environmental Information Processing	Signal transduction	ko04075//Plant hormone signal transduction	K14505
Aradu.13B2D	2	14.6667	0.04	0.286667	2.8413	1.79879e-06	7.18171e-06	Aradu.13B2D	glutamate receptor 2.8	GO:0016020//membrane	GO:0005215//transporter activity;GO:0004872//receptor activity;GO:0022834//ligand-gated channel activity;GO:0004871//signal transducer activity;GO:0005216//ion channel activity;GO:0005231//excitatory extracellular ligand-gated ion channel activity;GO:0060089//molecular transducer activity;GO:0022891//substrate-specific transmembrane transporter activity;GO:0005234//extracellular-glutamate-gated i…	GO:0051234//establishment of localization;GO:0051179//localization;GO:0006810//transport	-	-	-	-
Aradu.13N20	4.33333	0.333333	0.746667	0.0566667	-3.71989	0.00222612	0.00590835	Aradu.13N20	PREDICTED: uncharacterized protein LOC100527109	-	-	-	-	-	-	-
Aradu.13SBF	29.0033	210.557	4.13667	27.33	2.72394	8.65078e-58	2.28367e-56	Aradu.13SBF	PREDICTED: macrophage migration inhibitory factor homolog	-	-	-	-	-	-	-
Aradu.13SDX	2.36333	19.6133	0.126667	0.933333	2.88136	1.00199e-07	4.52001e-07	Aradu.13SDX	Regulator of Vps4 activity in the MVB pathway protein	-	-	-	Cellular Processes	Transport and catabolism	ko04144//Endocytosis	K19476
Aradu.149WS	789.317	3711.16	30.5633	132.053	2.11125	2.68804e-233	4.8085e-231	Aradu.149WS	aspartate aminotransferase	-	GO:0043167//ion binding;GO:0003824//catalytic activity;GO:0048037//cofactor binding;GO:0043168//anion binding;GO:0005488//binding;GO:1901363//heterocyclic compound binding;GO:0030170//pyridoxal phosphate binding;GO:0097159//organic cyclic compound binding	GO:0009058//biosynthetic process;GO:0008152//metabolic process	Metabolism	Biosynthesis of other secondary metabolites;Global and Overview;Amino acid metabolism	ko01230//Biosynthesis of amino acids;ko00400//Phenylalanine, tyrosine and tryptophan biosynthesis;ko00350//Tyrosine metabolism;ko00360//Phenylalanine metabolism;ko00960//Tropane, piperidine and pyridine alkaloid biosynthesis;ko00950//Isoquinoline alkaloid biosynthesis	K15849
Aradu.14CRM	11.91	2.63333	0.733333	0.15	-2.28951	1.32011e-05	4.78966e-05	Aradu.14CRM	methionine aminopeptidase 1B	-	GO:0070011//peptidase activity, acting on L-amino acid peptides;GO:0008237//metallopeptidase activity;GO:0008235//metalloexopeptidase activity;GO:0016787//hydrolase activity;GO:0008238//exopeptidase activity;GO:0004177//aminopeptidase activity;GO:0003824//catalytic activity;GO:0008233//peptidase activity	GO:0019538//protein metabolic process;GO:0006508//proteolysis;GO:0008152//metabolic process;GO:0071704//organic substance metabolic process;GO:0043170//macromolecule metabolic process;GO:0044238//primary metabolic process	-	-	-	-
Aradu.158JQ	4.33333	55	2.35667	27.9067	3.56579	2.62074e-22	2.74687e-21	Aradu.158JQ	aspartate aminotransferase	-	GO:1901363//heterocyclic compound binding;GO:0005488//binding;GO:0043167//ion binding;GO:0043168//anion binding;GO:0030170//pyridoxal phosphate binding;GO:0097159//organic cyclic compound binding;GO:0048037//cofactor binding;GO:0003824//catalytic activity	-	Metabolism	Biosynthesis of other secondary metabolites;Amino acid metabolism;Global and Overview	ko01230//Biosynthesis of amino acids;ko00400//Phenylalanine, tyrosine and tryptophan biosynthesis;ko00350//Tyrosine metabolism;ko00360//Phenylalanine metabolism;ko00960//Tropane, piperidine and pyridine alkaloid biosynthesis;ko00950//Isoquinoline alkaloid biosynthesis	K15849
Aradu.15REA	3.66667	17	0.266667	1.12	2.07039	7.24e-06	2.7081e-05	Aradu.15REA	monoterpene synthase	-	GO:0010333//terpene synthase activity;GO:0016838//carbon-oxygen lyase activity, acting on phosphates;GO:0003824//catalytic activity;GO:0016835//carbon-oxygen lyase activity;GO:0016829//lyase activity	GO:0008152//metabolic process	-	-	-	-
Aradu.15WFY	40.7	342.543	1.31	10.11	2.94814	6.37291e-98	3.21754e-96	Aradu.15WFY	PREDICTED: phosphatidylinositol:ceramide inositolphosphotransferase 1	-	-	-	-	-	-	-
Aradu.171F6	39	252.667	6.11667	35.8567	2.55142	7.22359e-42	1.36318e-40	Aradu.171F6	WRKY family transcription factor	-	GO:0097159//organic cyclic compound binding;GO:0003676//nucleic acid binding;GO:0003677//DNA binding;GO:0043565//sequence-specific DNA binding;GO:0003700//sequence-specific DNA binding transcription factor activity;GO:0001071//nucleic acid binding transcription factor activity;GO:1901363//heterocyclic compound binding;GO:0005488//binding	-	-	-	-	-
Aradu.17CVU	0	3.69333	0.001	0.11	6.78136	0.00134405	0.00369784	Aradu.17CVU	replication protein A 1A	-	-	-	Genetic Information Processing	Replication and repair	ko03420//Nucleotide excision repair;ko03030//DNA replication;ko03440//Homologous recombination;ko03430//Mismatch repair	K07466
Aradu.17W6W	7.08333	1.45667	0.14	0.0266667	-2.39232	0.0013784	0.00378453	Aradu.17W6W	LRR and NB-ARC domain disease resistance protein	-	GO:0032549//ribonucleoside binding;GO:0032550//purine ribonucleoside binding;GO:0032553//ribonucleotide binding;GO:0001883//purine nucleoside binding;GO:0000166//nucleotide binding;GO:0036094//small molecule binding;GO:0001882//nucleoside binding;GO:0017076//purine nucleotide binding;GO:0043531//ADP binding;GO:0030554//adenyl nucleotide binding;GO:1901363//heterocyclic compound binding;GO:0005488…	GO:0006950//response to stress;GO:0050896//response to stimulus;GO:0006952//defense response	-	-	-	-
Aradu.180Q6	1.33333	24.6667	0.07	1.14	4.02554	1.81048e-14	1.32182e-13	Aradu.180Q6	WRKY family transcription factor	-	GO:0001071//nucleic acid binding transcription factor activity;GO:0003676//nucleic acid binding;GO:1901363//heterocyclic compound binding;GO:0003677//DNA binding;GO:0005488//binding;GO:0003700//sequence-specific DNA binding transcription factor activity;GO:0043565//sequence-specific DNA binding;GO:0097159//organic cyclic compound binding	-	-	-	-	-
Aradu.182MN	1328.52	191.773	47.5267	6.32667	-2.90922	1.24038e-211	1.86694e-209	Aradu.182MN	Major facilitator superfamily protein	GO:0016020//membrane;GO:0005623//cell;GO:0044464//cell part;GO:0031224//intrinsic component of membrane;GO:0005886//plasma membrane;GO:0044425//membrane part;GO:0071944//cell periphery;GO:0016021//integral component of membrane	GO:0005215//transporter activity	GO:0055085//transmembrane transport;GO:0044763//single-organism cellular process;GO:0044765//single-organism transport;GO:0009987//cellular process;GO:0044699//single-organism process;GO:0006810//transport;GO:1902578//single-organism localization;GO:0051234//establishment of localization;GO:0051179//localization	-	-	-	-
Aradu.18FWJ	0.666667	16	0.11	2.45	4.47721	1.32774e-08	6.48137e-08	Aradu.18FWJ	Non-specific lipid-transfer protein, putative	-	GO:0005488//binding;GO:0008289//lipid binding	GO:0071702//organic substance transport;GO:0044765//single-organism transport;GO:0033036//macromolecule localization;GO:0051234//establishment of localization;GO:1902578//single-organism localization;GO:0010876//lipid localization;GO:0006869//lipid transport;GO:0006810//transport;GO:0051179//localization;GO:0044699//single-organism process	-	-	-	-
Aradu.18I2L	7.15	0.333333	1.47	0.0533333	-4.78463	2.3601e-05	8.29323e-05	Aradu.18I2L	PREDICTED: blue copper protein-like	-	GO:0005488//binding;GO:0043167//ion binding;GO:0046914//transition metal ion binding;GO:0005507//copper ion binding;GO:0043169//cation binding;GO:0009055//electron carrier activity;GO:0046872//metal ion binding	-	-	-	-	-
Aradu.18TLF	88.6967	15.6667	9.02667	1.43333	-2.65482	1.54949e-25	1.82994e-24	Aradu.18TLF	LOB domain-containing protein 38	-	-	-	-	-	-	-
Aradu.1A3FB	135.76	638.443	6.24333	26.9967	2.11239	2.40658e-82	9.66619e-81	Aradu.1A3FB	alpha/beta-Hydrolases superfamily protein	-	GO:0003824//catalytic activity	-	-	-	-	-
Aradu.1AP46	7.31667	63.3	0.23	1.81333	2.97894	3.63083e-17	3.04105e-16	Aradu.1AP46	receptor lectin kinase	-	GO:0043167//ion binding;GO:0097367//carbohydrate derivative binding;GO:0016301//kinase activity;GO:0016772//transferase activity, transferring phosphorus-containing groups;GO:0036094//small molecule binding;GO:1901363//heterocyclic compound binding;GO:0001883//purine nucleoside binding;GO:0001882//nucleoside binding;GO:0004672//protein kinase activity;GO:0032559//adenyl ribonucleotide binding;GO:…	GO:0044238//primary metabolic process;GO:0006464//cellular protein modification process;GO:0009987//cellular process;GO:0071704//organic substance metabolic process;GO:0044237//cellular metabolic process;GO:0008152//metabolic process;GO:0006796//phosphate-containing compound metabolic process;GO:0016310//phosphorylation;GO:0043412//macromolecule modification;GO:0019538//protein metabolic process;…	-	-	-	-
Aradu.1B07H	5.33333	0	0.87	0.001	-9.76487	4.95543e-05	0.000167508	Aradu.1B07H	cinnamyl alcohol dehydrogenase 5	-	GO:0046872//metal ion binding;GO:0008270//zinc ion binding;GO:0003824//catalytic activity;GO:0043169//cation binding;GO:0043167//ion binding;GO:0005488//binding;GO:0016491//oxidoreductase activity;GO:0046914//transition metal ion binding	GO:0044710//single-organism metabolic process;GO:0008152//metabolic process;GO:0055114//oxidation-reduction process;GO:0044699//single-organism process	Metabolism	Biosynthesis of other secondary metabolites	ko00940//Phenylpropanoid biosynthesis	K00083
Aradu.1B2LG	11.6667	64.6667	0.433333	2.24333	2.37209	6.73532e-18	5.84225e-17	Aradu.1B2LG	Cytochrome P450 superfamily protein	-	GO:0046906//tetrapyrrole binding;GO:0043167//ion binding;GO:0046914//transition metal ion binding;GO:0005506//iron ion binding;GO:0043169//cation binding;GO:0020037//heme binding;GO:0097159//organic cyclic compound binding;GO:0005488//binding;GO:0046872//metal ion binding;GO:1901363//heterocyclic compound binding	GO:0044699//single-organism process;GO:0044710//single-organism metabolic process;GO:0008152//metabolic process;GO:0055114//oxidation-reduction process	-	-	-	-
Aradu.1C2XH	1.33333	12	0.163333	1.41333	3.11321	1.51453e-06	6.09721e-06	Aradu.1C2XH	HSP20-like chaperones superfamily protein	-	-	-	Metabolism	Lipid metabolism	ko00590//Arachidonic acid metabolism	K15730
Aradu.1C3SG	2	18.3333	0.0733333	0.643333	3.13303	8.5728e-08	3.88853e-07	Aradu.1C3SG	WRKY family transcription factor	-	GO:0003676//nucleic acid binding;GO:0043565//sequence-specific DNA binding;GO:1901363//heterocyclic compound binding;GO:0003677//DNA binding;GO:0003700//sequence-specific DNA binding transcription factor activity;GO:0001071//nucleic acid binding transcription factor activity;GO:0005488//binding;GO:0097159//organic cyclic compound binding	-	-	-	-	-
Aradu.1C9UI	2.4	812.38	0.153333	47.6167	8.27865	2.3898e-307	6.96912e-305	Aradu.1C9UI	2-oxoglutarate (2OG) and Fe(II)-dependent oxygenase superfamily protein	-	GO:0005506//iron ion binding;GO:0046872//metal ion binding;GO:0003824//catalytic activity;GO:0043167//ion binding;GO:0043169//cation binding;GO:0016491//oxidoreductase activity;GO:0046914//transition metal ion binding;GO:0005488//binding	GO:0008152//metabolic process;GO:0044710//single-organism metabolic process;GO:0055114//oxidation-reduction process;GO:0044699//single-organism process	-	-	-	-
Aradu.1D34I	8.66667	2	0.41	0.0966667	-2.08453	0.00320676	0.00827	Aradu.1D34I	PREDICTED: mannan endo-1,4-beta-mannosidase 4-like	-	-	GO:0044238//primary metabolic process;GO:0005975//carbohydrate metabolic process;GO:0071704//organic substance metabolic process;GO:0008152//metabolic process	Metabolism	Carbohydrate metabolism	ko00051//Fructose and mannose metabolism	K19355
Aradu.1D7KB	0	18	0.001	0.916667	9.84025	1.02078e-13	7.11053e-13	Aradu.1D7KB	C4-dicarboxylate transporter/malic acid transport protein	GO:0031224//intrinsic component of membrane;GO:0016021//integral component of membrane;GO:0044425//membrane part;GO:0016020//membrane	-	GO:0006810//transport;GO:0044763//single-organism cellular process;GO:0044699//single-organism process;GO:0044765//single-organism transport;GO:1902578//single-organism localization;GO:0009987//cellular process;GO:0051179//localization;GO:0051234//establishment of localization;GO:0055085//transmembrane transport	-	-	-	-
Aradu.1DV6R	0.333333	12.2367	0.0333333	1.04667	4.97269	2.1942e-09	1.13924e-08	Aradu.1DV6R	myb transcription factor	-	GO:0044877//macromolecular complex binding;GO:0003676//nucleic acid binding;GO:0005488//binding;GO:0003677//DNA binding;GO:1901363//heterocyclic compound binding;GO:0097159//organic cyclic compound binding;GO:0003682//chromatin binding	-	-	-	-	-
Aradu.1E0WP	47.64	214.59	1.25	5.20333	2.05751	8.17725e-38	1.38659e-36	Aradu.1E0WP	Urea active transport protein	GO:0016020//membrane	GO:0005215//transporter activity	GO:0051234//establishment of localization;GO:0051179//localization;GO:0055085//transmembrane transport;GO:0006810//transport;GO:1902578//single-organism localization;GO:0009987//cellular process;GO:0044699//single-organism process;GO:0044765//single-organism transport;GO:0044763//single-organism cellular process	-	-	-	-
Aradu.1F5AZ	29.7833	224.867	0.756667	5.28	2.80281	4.96286e-65	1.51844e-63	Aradu.1F5AZ	kelch repeat F-box protein	-	GO:0005515//protein binding;GO:0005488//binding	-	-	-	-	-
Aradu.1G2BN	0.666667	8.66667	0.166667	1.87333	3.49057	1.47114e-05	5.30874e-05	Aradu.1G2BN	PREDICTED: protein MKS1-like	-	-	-	-	-	-	-
Aradu.1H68Z	56	566.69	4.50333	41.8533	3.21628	3.79388e-174	4.14889e-172	Aradu.1H68Z	Glutathione S-transferase family protein	-	GO:0005515//protein binding;GO:0005488//binding	-	Metabolism	Metabolism of other amino acids	ko00480//Glutathione metabolism	K00799
Aradu.1IC21	64.4867	10.52	1.02667	0.156667	-2.7122	2.30511e-16	1.85519e-15	Aradu.1IC21	cyclic nucleotide gated channel 19	-	-	-	Organismal Systems	Environmental adaptation	ko04626//Plant-pathogen interaction	K05391
Aradu.1J279	143.523	33.1	6.92333	1.49	-2.21615	2.18361e-38	3.76309e-37	Aradu.1J279	PREDICTED: U-box domain-containing protein 4-like	-	GO:0005515//protein binding;GO:0005488//binding	-	Cellular Processes	Transport and catabolism	ko04140//Regulation of autophagy	K08332
Aradu.1J4FF	6.66667	1	0.246667	0.04	-2.62449	0.00186073	0.00500597	Aradu.1J4FF	PREDICTED: UPF0481 protein	-	-	-	-	-	-	-
Aradu.1LY09	10	0.666667	2.49333	0.16	-3.96193	1.15501e-06	4.69882e-06	Aradu.1LY09	Unknown protein	-	-	-	-	-	-	-
Aradu.1M284	6.33333	0	0.77	0.001	-9.58871	3.90714e-06	1.50592e-05	Aradu.1M284	Unknown protein	-	-	-	-	-	-	-
Aradu.1M29V	0	4	0.001	0.24	7.90689	0.000785634	0.00224219	Aradu.1M29V	jasmonic acid carboxyl methyltransferase	-	GO:0003824//catalytic activity;GO:0016740//transferase activity;GO:0008168//methyltransferase activity;GO:0016741//transferase activity, transferring one-carbon groups	-	Metabolism	Lipid metabolism	ko00592//alpha-Linolenic acid metabolism	K08241
Aradu.1N3UE	6.66667	1.33333	1.41	0.226667	-2.63705	0.000584976	0.00170404	Aradu.1N3UE	2-isopropylmalate synthase 1	-	GO:0003824//catalytic activity	GO:0044763//single-organism cellular process;GO:0009987//cellular process;GO:0008152//metabolic process;GO:0019752//carboxylic acid metabolic process;GO:0044699//single-organism process;GO:0044237//cellular metabolic process;GO:0044281//small molecule metabolic process;GO:0044710//single-organism metabolic process;GO:0071704//organic substance metabolic process;GO:0043436//oxoacid metabolic proce…	Metabolism	Global and Overview;Carbohydrate metabolism;Amino acid metabolism	ko01230//Biosynthesis of amino acids;ko00620//Pyruvate metabolism;ko01210//2-Oxocarboxylic acid metabolism;ko00290//Valine, leucine and isoleucine biosynthesis	K01649
Aradu.1Q6A5	3.67	0	0.47	0.001	-8.87652	0.0036747	0.00935867	Aradu.1Q6A5	Protein of unknown function (DUF1068)	-	-	-	-	-	-	-
Aradu.1QI16	0	10.9967	0.001	0.543333	9.08569	1.17767e-09	6.25189e-09	Aradu.1QI16	Nutrient reservoir, putative n	-	GO:0045735//nutrient reservoir activity	-	-	-	-	-
Aradu.1QK3D	0.666667	6.89	0.373333	3.48333	3.22193	0.000734816	0.00210817	Aradu.1QK3D	Unknown protein	-	-	-	Environmental Information Processing	Signal transduction	ko04075//Plant hormone signal transduction	K14516
Aradu.1R2ZD	5	138.27	0.503333	12.9433	4.68455	5.44233e-79	2.07859e-77	Aradu.1R2ZD	PREDICTED: uncharacterized protein LOC100820285 isoform X2	-	-	-	-	-	-	-
Aradu.1T3UD	546.647	145.773	100.163	24.3633	-2.03957	8.32725e-54	2.02806e-52	Aradu.1T3UD	Bifunctional inhibitor/lipid-transfer protein/seed storage 2S albumin superfamily protein	-	-	-	-	-	-	-
Aradu.1TD34	37.6667	10.3333	1.36667	0.336667	-2.02127	7.89065e-10	4.24282e-09	Aradu.1TD34	carotenoid cleavage dioxygenase 7	-	-	-	Metabolism	Metabolism of terpenoids and polyketides	ko00906//Carotenoid biosynthesis	K17912
Aradu.1UI8P	2.49333	18.5367	0.17	1.12	2.71989	4.22567e-08	1.97479e-07	Aradu.1UI8P	PREDICTED: probable 2-oxoglutarate/Fe(II)-dependent dioxygenase-like	-	GO:0003824//catalytic activity;GO:0016491//oxidoreductase activity	GO:0008152//metabolic process;GO:0044710//single-organism metabolic process;GO:0044699//single-organism process;GO:0055114//oxidation-reduction process	Metabolism	Metabolism of terpenoids and polyketides	ko00904//Diterpenoid biosynthesis	K04125
Aradu.1V1I5	614.167	143.52	21.0667	4.59	-2.1984	1.2961e-43	2.55799e-42	Aradu.1V1I5	Cytochrome P450 superfamily protein	-	GO:0046914//transition metal ion binding;GO:0043169//cation binding;GO:0020037//heme binding;GO:0046906//tetrapyrrole binding;GO:0097159//organic cyclic compound binding;GO:0005488//binding;GO:0043167//ion binding;GO:0046872//metal ion binding;GO:0005506//iron ion binding;GO:1901363//heterocyclic compound binding	GO:0044710//single-organism metabolic process;GO:0044699//single-organism process;GO:0008152//metabolic process;GO:0055114//oxidation-reduction process	Metabolism	Metabolism of terpenoids and polyketides	ko00906//Carotenoid biosynthesis	K09843
Aradu.1X6G8	700.533	4377.58	27.4333	157.61	2.52236	1.11214e-223	1.8588e-221	Aradu.1X6G8	Cytochrome P450 superfamily protein	-	GO:0046872//metal ion binding;GO:0020037//heme binding;GO:0046914//transition metal ion binding;GO:0097159//organic cyclic compound binding;GO:0005488//binding;GO:0043169//cation binding;GO:0043167//ion binding;GO:1901363//heterocyclic compound binding;GO:0046906//tetrapyrrole binding;GO:0005506//iron ion binding	GO:0008152//metabolic process;GO:0055114//oxidation-reduction process;GO:0044699//single-organism process;GO:0044710//single-organism metabolic process	Metabolism	Biosynthesis of other secondary metabolites	ko00940//Phenylpropanoid biosynthesis	K09755
Aradu.1YE7N	0.333333	8.64333	0.153333	3.85333	4.65136	5.52641e-06	2.09328e-05	Aradu.1YE7N	sulfurtransferase protein 16	-	-	-	-	-	-	-
Aradu.1YY5F	4.16	26.1833	0.113333	0.68	2.58496	0.00111504	0.00310826	Aradu.1YY5F	Pentatricopeptide repeat (PPR) superfamily protein	-	GO:0005515//protein binding;GO:0005488//binding	-	-	-	-	-
Aradu.1ZB11	68.8333	5.72667	1.51	0.116667	-3.69408	1.5045e-38	2.60317e-37	Aradu.1ZB11	PREDICTED: dentin sialophosphoprotein-like isoform X4	-	-	-	-	-	-	-
Aradu.1ZR6L	59.8233	8.96333	5.72667	0.783333	-2.87	3.15558e-22	3.29635e-21	Aradu.1ZR6L	PREDICTED: transmembrane protein 45B-like	-	-	-	-	-	-	-
Aradu.20H38	18.5633	88.0867	0.65	2.80667	2.11035	3.03906e-23	3.3028e-22	Aradu.20H38	ATP-binding casette family G25 n	GO:0016020//membrane	GO:0016817//hydrolase activity, acting on acid anhydrides;GO:0017111//nucleoside-triphosphatase activity;GO:0097159//organic cyclic compound binding;GO:0097367//carbohydrate derivative binding;GO:0032555//purine ribonucleotide binding;GO:0017076//purine nucleotide binding;GO:0016818//hydrolase activity, acting on acid anhydrides, in phosphorus-containing anhydrides;GO:0032553//ribonucleotide bind…	-	-	-	-	-
Aradu.20INS	7.14333	1.11	0.69	0.11	-2.64909	0.00113389	0.00315733	Aradu.20INS	myb transcription factor	-	GO:0044877//macromolecular complex binding;GO:0005488//binding;GO:0003676//nucleic acid binding;GO:0097159//organic cyclic compound binding;GO:0003682//chromatin binding;GO:0003677//DNA binding;GO:1901363//heterocyclic compound binding	-	-	-	-	-
Aradu.20JKI	12.5	121.813	1.17	10.1967	3.12352	2.34137e-45	4.79502e-44	Aradu.20JKI	methyl esterase 1	-	-	-	-	-	-	-
Aradu.2119N	5552.65	1485.82	94.9433	23.21	-2.03232	1.81559e-57	4.77039e-56	Aradu.2119N	zinc finger protein-related	-	GO:0005488//binding;GO:0046872//metal ion binding;GO:0043169//cation binding;GO:0005515//protein binding;GO:0008270//zinc ion binding;GO:0043167//ion binding;GO:0046914//transition metal ion binding	-	-	-	-	-
Aradu.21XDZ	64.4967	514.447	1.01	7.40333	2.87382	2.50381e-134	1.93101e-132	Aradu.21XDZ	PREDICTED: cysteine-rich receptor-like protein kinase 2-like	-	GO:0003824//catalytic activity;GO:0005524//ATP binding;GO:0035639//purine ribonucleoside triphosphate binding;GO:0030554//adenyl nucleotide binding;GO:0032550//purine ribonucleoside binding;GO:0043167//ion binding;GO:0097159//organic cyclic compound binding;GO:0016773//phosphotransferase activity, alcohol group as acceptor;GO:0017076//purine nucleotide binding;GO:0001882//nucleoside binding;GO:00…	GO:0006468//protein phosphorylation;GO:0006464//cellular protein modification process;GO:0044260//cellular macromolecule metabolic process;GO:0044237//cellular metabolic process;GO:0043412//macromolecule modification;GO:0006793//phosphorus metabolic process;GO:0016310//phosphorylation;GO:0044267//cellular protein metabolic process;GO:0019538//protein metabolic process;GO:0043170//macromolecule me…	-	-	-	-
Aradu.22IYP	10.5467	1.08	0.243333	0.0233333	-3.38247	6.26153e-07	2.61888e-06	Aradu.22IYP	beta-galactosidase 11	-	GO:0005488//binding;GO:0030246//carbohydrate binding	GO:0044238//primary metabolic process;GO:0008152//metabolic process;GO:0071704//organic substance metabolic process;GO:0005975//carbohydrate metabolic process	-	-	-	-
Aradu.22KJ4	157.513	24.77	14.4167	2.08	-2.79308	9.5002e-30	1.29202e-28	Aradu.22KJ4	Heavy metal transport/detoxification superfamily protein	-	GO:0005488//binding;GO:0046872//metal ion binding;GO:0043169//cation binding;GO:0043167//ion binding	GO:0044699//single-organism process;GO:0051179//localization;GO:0006810//transport;GO:0051234//establishment of localization;GO:0044765//single-organism transport;GO:1902578//single-organism localization;GO:0006812//cation transport;GO:0030001//metal ion transport;GO:0006811//ion transport	-	-	-	-
Aradu.23179	0.666667	117.927	0.08	12.1733	7.24951	4.11816e-75	1.47997e-73	Aradu.23179	PEBP (phosphatidylethanolamine-binding protein) family protein	-	-	-	-	-	-	-
Aradu.237HP	15.9533	86.97	1.39333	6.99333	2.32744	4.44763e-28	5.73004e-27	Aradu.237HP	LAG1 longevity assurance homolog 3	GO:0031224//intrinsic component of membrane;GO:0044425//membrane part;GO:0016021//integral component of membrane;GO:0016020//membrane	-	-	Metabolism	Lipid metabolism	ko00600//Sphingolipid metabolism	K04710
Aradu.24BEK	19.3233	0.333333	0.946667	0.0166667	-5.82782	8.08782e-16	6.3397e-15	Aradu.24BEK	UDP-Glycosyltransferase superfamily protein	-	-	GO:0008152//metabolic process	-	-	-	-
Aradu.251QA	3.03	109.707	0.0933333	3.18333	5.092	7.09812e-58	1.87822e-56	Aradu.251QA	PREDICTED: external alternative NAD(P)H-ubiquinone oxidoreductase B2, mitochondrial-like isoform X2	-	GO:0016491//oxidoreductase activity;GO:0046872//metal ion binding;GO:0043168//anion binding;GO:0005488//binding;GO:0003824//catalytic activity;GO:1901363//heterocyclic compound binding;GO:0050660//flavin adenine dinucleotide binding;GO:0000166//nucleotide binding;GO:0043169//cation binding;GO:0043167//ion binding;GO:0036094//small molecule binding;GO:0097159//organic cyclic compound binding;GO:19…	GO:0044710//single-organism metabolic process;GO:0044699//single-organism process;GO:0008152//metabolic process;GO:0055114//oxidation-reduction process	-	-	-	-
Aradu.25598	66.41	718.117	2.36667	23.3533	3.3027	1.1655e-195	1.55375e-193	Aradu.25598	PREDICTED: probable 2-oxoglutarate/Fe(II)-dependent dioxygenase-like	-	GO:0003824//catalytic activity;GO:0016491//oxidoreductase activity	GO:0055114//oxidation-reduction process;GO:0044710//single-organism metabolic process;GO:0008152//metabolic process;GO:0044699//single-organism process	-	-	-	-
Aradu.2597P	0.666667	7.44667	0.316667	3.23	3.3505	0.000312449	0.000947895	Aradu.2597P	PREDICTED: ABC transporter G family member 22-like isoform X2	-	-	-	-	-	-	-
Aradu.25VG6	3.36333	0	0.37	0.001	-8.53138	0.00238958	0.00630128	Aradu.25VG6	SAUR-like auxin-responsive protein family	-	-	-	-	-	-	-
Aradu.262YC	13.87	64.18	1.60667	6.66667	2.05289	2.15037e-13	1.46903e-12	Aradu.262YC	LOB domain-containing protein 4	-	-	-	-	-	-	-
Aradu.268F1	0	3.92333	0.001	0.16	7.32193	0.00167458	0.00453546	Aradu.268F1	cytochrome P450, family 78, subfamily A, polypeptide 7	-	GO:0005506//iron ion binding;GO:0097159//organic cyclic compound binding;GO:0046872//metal ion binding;GO:0020037//heme binding;GO:0043169//cation binding;GO:0005488//binding;GO:0046914//transition metal ion binding;GO:0046906//tetrapyrrole binding;GO:0043167//ion binding;GO:1901363//heterocyclic compound binding	GO:0044699//single-organism process;GO:0044710//single-organism metabolic process;GO:0008152//metabolic process;GO:0055114//oxidation-reduction process	-	-	-	-
Aradu.27C7S	21.09	1705.19	0.77	57.1867	6.21468	0	0	Aradu.27C7S	beta-fructofuranosidase; cell wall invertase I; fructosidase	-	-	GO:0071704//organic substance metabolic process;GO:0008152//metabolic process;GO:0005975//carbohydrate metabolic process;GO:0044238//primary metabolic process	Metabolism	Carbohydrate metabolism	ko00500//Starch and sucrose metabolism;ko00052//Galactose metabolism	K01193
Aradu.27SYD	10.7367	0.333333	0.98	0.03	-5.02975	2.41908e-06	9.54117e-06	Aradu.27SYD	xyloglucan endotransglucosylase/hydrolase 21	GO:0048046//apoplast;GO:0005618//cell wall;GO:0030312//external encapsulating structure;GO:0005576//extracellular region;GO:0044464//cell part;GO:0005623//cell;GO:0071944//cell periphery	GO:0003824//catalytic activity;GO:0016740//transferase activity;GO:0016757//transferase activity, transferring glycosyl groups;GO:0016758//transferase activity, transferring hexosyl groups;GO:0016762//xyloglucan:xyloglucosyl transferase activity	GO:0006073//cellular glucan metabolic process;GO:0044262//cellular carbohydrate metabolic process;GO:0044238//primary metabolic process;GO:0005975//carbohydrate metabolic process;GO:0044237//cellular metabolic process;GO:0044260//cellular macromolecule metabolic process;GO:0009987//cellular process;GO:0005976//polysaccharide metabolic process;GO:0044264//cellular polysaccharide metabolic process;…	-	-	-	-
Aradu.28IY3	4.66667	95.5633	0.15	2.78667	4.21551	1.40617e-38	2.43529e-37	Aradu.28IY3	receptor-like protein kinase 4	-	GO:0043167//ion binding;GO:0032559//adenyl ribonucleotide binding;GO:0032549//ribonucleoside binding;GO:0016301//kinase activity;GO:0004672//protein kinase activity;GO:0005524//ATP binding;GO:0001882//nucleoside binding;GO:1901363//heterocyclic compound binding;GO:0097159//organic cyclic compound binding;GO:0017076//purine nucleotide binding;GO:0016772//transferase activity, transferring phosphor…	GO:0044237//cellular metabolic process;GO:0006796//phosphate-containing compound metabolic process;GO:0043170//macromolecule metabolic process;GO:0044238//primary metabolic process;GO:0009987//cellular process;GO:0008152//metabolic process;GO:0019538//protein metabolic process;GO:0036211//protein modification process;GO:0044260//cellular macromolecule metabolic process;GO:0006793//phosphorus meta…	-	-	-	-
Aradu.28P5F	5	29.3333	1.06333	5.73333	2.43078	3.9469e-11	2.32769e-10	Aradu.28P5F	BON1-associated-like protein	-	GO:0005488//binding;GO:0005515//protein binding	-	-	-	-	-
Aradu.28YU2	23.6733	2.66667	2.22333	0.24	-3.21162	2.1042e-12	1.35359e-11	Aradu.28YU2	ferredoxin-related	-	-	-	-	-	-	-
Aradu.29SDF	7.46667	1.66667	0.15	0.03	-2.32193	0.00116304	0.00323303	Aradu.29SDF	laccase 14	GO:0048046//apoplast;GO:0005576//extracellular region	GO:0005507//copper ion binding;GO:0046872//metal ion binding;GO:0005488//binding;GO:0043169//cation binding;GO:0016682//oxidoreductase activity, acting on diphenols and related substances as donors, oxygen as acceptor;GO:0052716//hydroquinone:oxygen oxidoreductase activity;GO:0043167//ion binding;GO:0003824//catalytic activity;GO:0016491//oxidoreductase activity;GO:0046914//transition metal ion b…	GO:0019439//aromatic compound catabolic process;GO:1901361//organic cyclic compound catabolic process;GO:0006725//cellular aromatic compound metabolic process;GO:0044763//single-organism cellular process;GO:0044699//single-organism process;GO:0046271//phenylpropanoid catabolic process;GO:0019748//secondary metabolic process;GO:0009698//phenylpropanoid metabolic process;GO:0044712//single-organism…	-	-	-	-
Aradu.29VJC	345.09	59.57	29.1267	4.66333	-2.64291	1.9647e-86	8.42954e-85	Aradu.29VJC	ferredoxin-related	-	-	-	-	-	-	-
Aradu.2BI4W	42.3433	191.197	0.573333	2.39	2.05956	1.506e-38	2.60495e-37	Aradu.2BI4W	ATP-binding ABC transporter	GO:0031224//intrinsic component of membrane;GO:0044425//membrane part;GO:0016021//integral component of membrane;GO:0016020//membrane	GO:1901363//heterocyclic compound binding;GO:0003824//catalytic activity;GO:0016462//pyrophosphatase activity;GO:0016817//hydrolase activity, acting on acid anhydrides;GO:0030554//adenyl nucleotide binding;GO:0017076//purine nucleotide binding;GO:0017111//nucleoside-triphosphatase activity;GO:0097159//organic cyclic compound binding;GO:0043167//ion binding;GO:0001882//nucleoside binding;GO:003255…	GO:0009987//cellular process;GO:0044763//single-organism cellular process;GO:1902578//single-organism localization;GO:0044699//single-organism process;GO:0006810//transport;GO:0051179//localization;GO:0044765//single-organism transport;GO:0055085//transmembrane transport;GO:0051234//establishment of localization	-	-	-	-
Aradu.2E07P	9.66667	61	2.98667	17.2767	2.53222	1.23681e-18	1.11299e-17	Aradu.2E07P	PREDICTED: uncharacterized protein LOC100820626 isoform X1	-	-	-	-	-	-	-
Aradu.2E6KW	0	5.33333	0.001	1.60667	10.6499	0.000345237	0.00104077	Aradu.2E6KW	Glycine-rich protein family	-	-	-	-	-	-	-
Aradu.2F2TZ	7.49	110.397	0.433333	5.91667	3.77124	1.25685e-52	2.9882e-51	Aradu.2F2TZ	PREDICTED: uncharacterized protein LOC100795398 isoform X1	-	-	-	-	-	-	-
Aradu.2GI7U	7.33333	1	1.00667	0.13	-2.953	0.000268342	0.000822553	Aradu.2GI7U	PREDICTED: 1-aminocyclopropane-1-carboxylate oxidase homolog 12-like	-	GO:0016491//oxidoreductase activity;GO:0003824//catalytic activity	GO:0008152//metabolic process;GO:0044699//single-organism process;GO:0044710//single-organism metabolic process;GO:0055114//oxidation-reduction process	-	-	-	-
Aradu.2H0R0	0	10	0.001	0.356667	8.47843	6.80473e-08	3.12144e-07	Aradu.2H0R0	allergen gly M Bd 28 kDa protein	-	GO:0045735//nutrient reservoir activity	-	-	-	-	-
Aradu.2I26G	35.3067	4.53	2.34	0.273333	-3.09778	1.59015e-18	1.42e-17	Aradu.2I26G	Cytochrome P450 superfamily protein	-	GO:0097159//organic cyclic compound binding;GO:0046906//tetrapyrrole binding;GO:0043169//cation binding;GO:0005488//binding;GO:0046914//transition metal ion binding;GO:0005506//iron ion binding;GO:1901363//heterocyclic compound binding;GO:0043167//ion binding;GO:0046872//metal ion binding;GO:0020037//heme binding	GO:0044699//single-organism process;GO:0055114//oxidation-reduction process;GO:0008152//metabolic process;GO:0044710//single-organism metabolic process	-	-	-	-
Aradu.2IP8A	0.333333	11.2433	0.01	0.346667	5.11548	1.32622e-08	6.47508e-08	Aradu.2IP8A	ATP binding protein, putative n	-	GO:0004672//protein kinase activity;GO:0097367//carbohydrate derivative binding;GO:0036094//small molecule binding;GO:0016773//phosphotransferase activity, alcohol group as acceptor;GO:0005515//protein binding;GO:1901363//heterocyclic compound binding;GO:0005509//calcium ion binding;GO:0030247//polysaccharide binding;GO:0035639//purine ribonucleoside triphosphate binding;GO:0005524//ATP binding;G…	GO:0016310//phosphorylation;GO:0044260//cellular macromolecule metabolic process;GO:0006464//cellular protein modification process;GO:0019538//protein metabolic process;GO:0043412//macromolecule modification;GO:0071704//organic substance metabolic process;GO:0008152//metabolic process;GO:0009987//cellular process;GO:0043170//macromolecule metabolic process;GO:0006796//phosphate-containing compoun…	-	-	-	-
Aradu.2K04Y	6.99333	92.67	0.91	10.99	3.59418	1.25631e-45	2.58231e-44	Aradu.2K04Y	seed maturation protein	-	-	GO:0032501//multicellular organismal process;GO:0007275//multicellular organismal development;GO:0044767//single-organism developmental process;GO:0032502//developmental process;GO:0044699//single-organism process;GO:0048856//anatomical structure development;GO:0044707//single-multicellular organism process;GO:0009790//embryo development	-	-	-	-
Aradu.2LS1H	30.9	5.21333	4.37333	0.663333	-2.72093	4.6902e-14	3.33726e-13	Aradu.2LS1H	PREDICTED: putative disease resistance RPP13-like protein 1-like isoform X6	-	-	-	-	-	-	-
Aradu.2QN43	307.473	2283.1	9.69333	65.86	2.76434	1.09303e-286	2.87322e-284	Aradu.2QN43	NAD(P)-binding Rossmann-fold superfamily protein	-	GO:0016491//oxidoreductase activity;GO:0003824//catalytic activity	GO:0008152//metabolic process	Metabolism	Metabolism of terpenoids and polyketides	ko00902//Monoterpenoid biosynthesis	K15095
Aradu.2QX0T	4.30667	524.463	0.276667	31.2033	6.81741	7.80861e-229	1.3536e-226	Aradu.2QX0T	O-methyltransferase family protein	-	GO:0016740//transferase activity;GO:0046983//protein dimerization activity;GO:0016741//transferase activity, transferring one-carbon groups;GO:0003824//catalytic activity;GO:0005488//binding;GO:0008171//O-methyltransferase activity;GO:0005515//protein binding;GO:0008168//methyltransferase activity	-	Metabolism	Biosynthesis of other secondary metabolites	ko00943//Isoflavonoid biosynthesis	K13262
Aradu.2R9F5	35.99	9.24333	0.4	0.0933333	-2.09954	1.96082e-11	1.18217e-10	Aradu.2R9F5	Clathrin, heavy chain	GO:0030136//clathrin-coated vesicle;GO:0030660//Golgi-associated vesicle membrane;GO:0005622//intracellular;GO:0043227//membrane-bounded organelle;GO:0031090//organelle membrane;GO:0031988//membrane-bounded vesicle;GO:0044464//cell part;GO:0030130//clathrin coat of trans-Golgi network vesicle;GO:0000139//Golgi membrane;GO:0048475//coated membrane;GO:0030132//clathrin coat of coated pit;GO:0030120…	GO:0005198//structural molecule activity;GO:0005488//binding;GO:0005515//protein binding	GO:0015031//protein transport;GO:0008104//protein localization;GO:0045184//establishment of protein localization;GO:0033036//macromolecule localization;GO:0034613//cellular protein localization;GO:0006886//intracellular protein transport;GO:0006810//transport;GO:0016192//vesicle-mediated transport;GO:0046907//intracellular transport;GO:0051649//establishment of localization in cell;GO:0071702//or…	Cellular Processes	Transport and catabolism	ko04144//Endocytosis	K04646
Aradu.2SC4B	119.467	23.3667	6.97667	1.24333	-2.48832	7.5493e-38	1.28205e-36	Aradu.2SC4B	aluminum-activated malate transporter 1	-	-	GO:0051179//localization;GO:0015743//malate transport;GO:0044699//single-organism process;GO:0015740//C4-dicarboxylate transport;GO:0006811//ion transport;GO:0071702//organic substance transport;GO:0006820//anion transport;GO:1902578//single-organism localization;GO:0006835//dicarboxylic acid transport;GO:0006810//transport;GO:0046942//carboxylic acid transport;GO:0051234//establishment of locali…	-	-	-	-
Aradu.2U1V2	3582.26	763.673	219.803	42.4633	-2.37192	3.16407e-100	1.64646e-98	Aradu.2U1V2	2-oxoglutarate (2OG) and Fe(II)-dependent oxygenase superfamily protein	-	GO:0016491//oxidoreductase activity;GO:0003824//catalytic activity	GO:0044699//single-organism process;GO:0055114//oxidation-reduction process;GO:0044710//single-organism metabolic process;GO:0008152//metabolic process	-	-	-	-
Aradu.2V0VG	2.33	390.653	0.0833333	12.96	7.28096	2.66421e-231	4.7507e-229	Aradu.2V0VG	Uncharacterised conserved protein UCP015417, vWA	-	-	-	-	-	-	-
Aradu.2V34U	154.727	1051.02	2.55667	15.9833	2.64423	1.56442e-175	1.73453e-173	Aradu.2V34U	beta glucosidase 46	-	-	GO:0008152//metabolic process;GO:0005975//carbohydrate metabolic process;GO:0044238//primary metabolic process;GO:0071704//organic substance metabolic process	Metabolism	Biosynthesis of other secondary metabolites;Metabolism of other amino acids;Carbohydrate metabolism	ko00500//Starch and sucrose metabolism;ko00940//Phenylpropanoid biosynthesis;ko00460//Cyanoamino acid metabolism	K05350
Aradu.2W676	49.66	804.66	4.80333	71.4967	3.89577	3.49182e-268	8.18035e-266	Aradu.2W676	Peroxidase superfamily protein	-	GO:0003824//catalytic activity;GO:0016209//antioxidant activity;GO:0097159//organic cyclic compound binding;GO:0046906//tetrapyrrole binding;GO:0004601//peroxidase activity;GO:0016684//oxidoreductase activity, acting on peroxide as acceptor;GO:1901363//heterocyclic compound binding;GO:0005488//binding;GO:0016491//oxidoreductase activity;GO:0020037//heme binding	GO:0006979//response to oxidative stress;GO:0006950//response to stress;GO:0044699//single-organism process;GO:0055114//oxidation-reduction process;GO:0008152//metabolic process;GO:0044710//single-organism metabolic process;GO:0050896//response to stimulus	Metabolism	Biosynthesis of other secondary metabolites	ko00940//Phenylpropanoid biosynthesis	K00430
Aradu.2W7VB	4.33333	0.333333	1.43667	0.11	-3.70715	0.0033759	0.00865933	Aradu.2W7VB	Unknown protein	-	-	-	-	-	-	-
Aradu.2X47D	19.8833	156.363	0.563333	4.05667	2.84823	1.4656e-40	2.66603e-39	Aradu.2X47D	terpene synthase 14	-	GO:0043167//ion binding;GO:0005488//binding;GO:0016829//lyase activity;GO:0003824//catalytic activity;GO:0000287//magnesium ion binding;GO:0043169//cation binding;GO:0010333//terpene synthase activity;GO:0016838//carbon-oxygen lyase activity, acting on phosphates;GO:0046872//metal ion binding;GO:0016835//carbon-oxygen lyase activity	GO:0008152//metabolic process	Metabolism	Metabolism of terpenoids and polyketides	ko00902//Monoterpenoid biosynthesis	K15086
Aradu.2XW42	1	24.9833	0.02	0.366667	4.1964	1.16932e-15	9.08441e-15	Aradu.2XW42	Protein kinase family protein	-	GO:1901363//heterocyclic compound binding;GO:1901265//nucleoside phosphate binding;GO:0004672//protein kinase activity;GO:0032549//ribonucleoside binding;GO:0016772//transferase activity, transferring phosphorus-containing groups;GO:0032555//purine ribonucleotide binding;GO:0043167//ion binding;GO:0016773//phosphotransferase activity, alcohol group as acceptor;GO:0032553//ribonucleotide binding;G…	GO:0016310//phosphorylation;GO:0071704//organic substance metabolic process;GO:0009987//cellular process;GO:0036211//protein modification process;GO:0044267//cellular protein metabolic process;GO:0043170//macromolecule metabolic process;GO:0044238//primary metabolic process;GO:0019538//protein metabolic process;GO:0006796//phosphate-containing compound metabolic process;GO:0044237//cellular metab…	-	-	-	-
Aradu.30JS6	0.333333	50.94	0.0233333	3.58	7.26142	3.49803e-37	5.82738e-36	Aradu.30JS6	Uncharacterised conserved protein UCP015417, vWA	-	-	-	-	-	-	-
Aradu.31UBA	220.667	1217.33	35.11	176.07	2.3262	1.51208e-99	7.77438e-98	Aradu.31UBA	Unknown protein	-	-	-	-	-	-	-
Aradu.329PQ	46.2233	10.4967	1.44667	0.3	-2.2697	1.81909e-14	1.32794e-13	Aradu.329PQ	polygalacturonase non-catalytic protein	-	-	-	-	-	-	-
Aradu.32A1K	21.28	101.343	3.9	17.22	2.14254	2.29078e-27	2.8849e-26	Aradu.32A1K	Disease resistance-responsive (dirigent-like protein) family protein	-	-	-	-	-	-	-
Aradu.32LC7	85.82	783.397	2.75	23.22	3.07786	5.32357e-129	3.84609e-127	Aradu.32LC7	myo-inositol-1-phosphate synthase 3	-	GO:0003824//catalytic activity;GO:0004512//inositol-3-phosphate synthase activity;GO:0016872//intramolecular lyase activity;GO:0016853//isomerase activity	GO:0008654//phospholipid biosynthetic process;GO:0044237//cellular metabolic process;GO:0009058//biosynthetic process;GO:0090407//organophosphate biosynthetic process;GO:0034637//cellular carbohydrate biosynthetic process;GO:1901615//organic hydroxy compound metabolic process;GO:0046173//polyol biosynthetic process;GO:0005975//carbohydrate metabolic process;GO:0006793//phosphorus metabolic proces…	Metabolism	Carbohydrate metabolism	ko00562//Inositol phosphate metabolism	K01858
Aradu.32P5Q	32.7533	1.33667	1.76667	0.0666667	-4.72792	5.86328e-19	5.35286e-18	Aradu.32P5Q	Oxysterol-binding family protein	-	GO:0003824//catalytic activity	GO:0008152//metabolic process	Metabolism	Energy metabolism;Global and Overview;Carbohydrate metabolism	ko01200//Carbon metabolism;ko01230//Biosynthesis of amino acids;ko00710//Carbon fixation in photosynthetic organisms;ko00030//Pentose phosphate pathway	K00615
Aradu.337PG	2.35333	16.8667	0.283333	1.83333	2.6939	6.26457e-07	2.61995e-06	Aradu.337PG	CDGSH iron-sulfur domain protein	GO:0044464//cell part;GO:0005623//cell;GO:0043229//intracellular organelle;GO:0005622//intracellular;GO:0044424//intracellular part;GO:0043226//organelle;GO:0043227//membrane-bounded organelle;GO:0043231//intracellular membrane-bounded organelle	-	-	-	-	-	-
Aradu.33VZ6	7.53333	216.777	0.513333	13.3833	4.7044	1.11787e-107	6.31379e-106	Aradu.33VZ6	TIFY domain/Divergent CCT motif family protein	-	-	-	Environmental Information Processing	Signal transduction	ko04075//Plant hormone signal transduction	K13464
Aradu.33XZT	11.86	76.2533	0.666667	3.98667	2.58015	8.9908e-22	9.24695e-21	Aradu.33XZT	PREDICTED: probable nucleoredoxin 2-like isoform 1	-	-	GO:0050789//regulation of biological process;GO:0044763//single-organism cellular process;GO:0007165//signal transduction;GO:0044700//single organism signaling;GO:0051716//cellular response to stimulus;GO:0050896//response to stimulus;GO:0044699//single-organism process;GO:0009987//cellular process;GO:0035556//intracellular signal transduction;GO:0050794//regulation of cellular process;GO:0023052…	-	-	-	-
Aradu.348PZ	12.3333	634.91	0.606667	28.1333	5.53523	1.46219e-271	3.51371e-269	Aradu.348PZ	branched-chain amino acid transaminase 2	-	GO:0004084//branched-chain-amino-acid transaminase activity;GO:0003824//catalytic activity;GO:0016769//transferase activity, transferring nitrogenous groups;GO:0016740//transferase activity;GO:0008483//transaminase activity	GO:0006807//nitrogen compound metabolic process;GO:0006082//organic acid metabolic process;GO:0044237//cellular metabolic process;GO:0044710//single-organism metabolic process;GO:0044763//single-organism cellular process;GO:0071704//organic substance metabolic process;GO:0009987//cellular process;GO:0044281//small molecule metabolic process;GO:0044238//primary metabolic process;GO:0009081//branch…	Metabolism	Global and Overview;Amino acid metabolism;Metabolism of cofactors and vitamins	ko01230//Biosynthesis of amino acids;ko00270//Cysteine and methionine metabolism;ko00280//Valine, leucine and isoleucine degradation;ko01210//2-Oxocarboxylic acid metabolism;ko00770//Pantothenate and CoA biosynthesis;ko00290//Valine, leucine and isoleucine biosynthesis	K00826
Aradu.34L9V	1.66667	18.0033	0.06	0.633333	3.39993	3.51146e-10	1.93723e-09	Aradu.34L9V	hydroxymethylglutaryl-CoA lyase	-	GO:0016833//oxo-acid-lyase activity;GO:0003824//catalytic activity;GO:0016829//lyase activity;GO:0004419//hydroxymethylglutaryl-CoA lyase activity;GO:0016830//carbon-carbon lyase activity	-	Metabolism;Cellular Processes	Lipid metabolism;Transport and catabolism;Carbohydrate metabolism;Amino acid metabolism	ko04146//Peroxisome;ko00280//Valine, leucine and isoleucine degradation;ko00650//Butanoate metabolism;ko00072//Synthesis and degradation of ketone bodies	K01640
Aradu.34QFB	95	2807.67	3.39667	92.2167	4.76284	0	0	Aradu.34QFB	Auxin efflux carrier family protein	GO:0031224//intrinsic component of membrane;GO:0044425//membrane part;GO:0016021//integral component of membrane;GO:0016020//membrane	-	GO:0044699//single-organism process;GO:0051234//establishment of localization;GO:0044763//single-organism cellular process;GO:0055085//transmembrane transport;GO:1902578//single-organism localization;GO:0006810//transport;GO:0009987//cellular process;GO:0044765//single-organism transport;GO:0051179//localization	-	-	-	-
Aradu.3602N	295.087	1658.73	48.95	251.99	2.36399	5.05795e-216	7.97745e-214	Aradu.3602N	Glutathione S-transferase family protein	-	GO:0005488//binding;GO:0005515//protein binding	-	Metabolism	Metabolism of other amino acids	ko00480//Glutathione metabolism	K00799
Aradu.387LH	7.21667	1.38667	0.336667	0.0633333	-2.41028	0.00240992	0.00635061	Aradu.387LH	katanin p80 WD40 repeat subunit B1-like protein	-	GO:0005488//binding;GO:0005515//protein binding	-	-	-	-	-
Aradu.38JU0	8	1.66667	0.443333	0.0866667	-2.35484	0.000466287	0.00137729	Aradu.38JU0	basic helix-loop-helix (bHLH) DNA-binding superfamily protein	-	GO:0005515//protein binding;GO:0046983//protein dimerization activity;GO:0005488//binding	-	-	-	-	-
Aradu.38L67	17.3333	79.76	10.5333	44.23	2.07006	1.05575e-17	9.0789e-17	Aradu.38L67	MATE efflux family protein	GO:0016020//membrane	GO:0015238//drug transmembrane transporter activity;GO:0015291//secondary active transmembrane transporter activity;GO:0015297//antiporter activity;GO:0090484//drug transporter activity;GO:0022857//transmembrane transporter activity;GO:0005215//transporter activity;GO:0022804//active transmembrane transporter activity	GO:0009987//cellular process;GO:0044699//single-organism process;GO:0042493//response to drug;GO:0006855//drug transmembrane transport;GO:0006810//transport;GO:0015893//drug transport;GO:0051234//establishment of localization;GO:0055085//transmembrane transport;GO:1902578//single-organism localization;GO:0044765//single-organism transport;GO:0044763//single-organism cellular process;GO:0042221//r…	-	-	-	-
Aradu.38T8A	249	50.3033	5.64	1.04	-2.43911	4.04138e-59	1.09051e-57	Aradu.38T8A	subtilisin-like serine protease 2	-	GO:0003824//catalytic activity;GO:0016787//hydrolase activity;GO:0004175//endopeptidase activity;GO:0004252//serine-type endopeptidase activity;GO:0042802//identical protein binding;GO:0005488//binding;GO:0070011//peptidase activity, acting on L-amino acid peptides;GO:0017171//serine hydrolase activity;GO:0005515//protein binding;GO:0008236//serine-type peptidase activity;GO:0008233//peptidase ac…	GO:0006508//proteolysis;GO:0071704//organic substance metabolic process;GO:0050789//regulation of biological process;GO:0043086//negative regulation of catalytic activity;GO:0019222//regulation of metabolic process;GO:0044238//primary metabolic process;GO:0043170//macromolecule metabolic process;GO:0019538//protein metabolic process;GO:0050790//regulation of catalytic activity;GO:0065007//biologi…	-	-	-	-
Aradu.398HV	3.66333	91.46	0.113333	2.58667	4.51245	1.04524e-41	1.96125e-40	Aradu.398HV	Cytochrome P450 superfamily protein	-	GO:0020037//heme binding;GO:0043167//ion binding;GO:0046872//metal ion binding;GO:0046914//transition metal ion binding;GO:0097159//organic cyclic compound binding;GO:0005506//iron ion binding;GO:1901363//heterocyclic compound binding;GO:0005488//binding;GO:0043169//cation binding;GO:0046906//tetrapyrrole binding	GO:0044710//single-organism metabolic process;GO:0044699//single-organism process;GO:0008152//metabolic process;GO:0055114//oxidation-reduction process	-	-	-	-
Aradu.39CB1	21.04	4.67667	5.57333	1.19	-2.22758	1.07355e-08	5.28477e-08	Aradu.39CB1	RING zinc finger protein, putative	-	-	-	-	-	-	-
Aradu.39CFF	10.6667	51.3333	0.643333	2.87333	2.15909	7.73611e-13	5.11215e-12	Aradu.39CFF	F-box protein LC chr8:42876159-42874960 20130731	-	GO:0005488//binding;GO:0005515//protein binding	-	-	-	-	-
Aradu.39G9P	124.173	1534.76	2.93667	33.4	3.5076	2.34474573204002e-311	0	Aradu.39G9P	HXXXD-type acyl-transferase family protein	-	-	-	-	-	-	-
Aradu.3CD7I	1.09667	17.4867	0.0433333	0.653333	3.91427	8.96179e-10	4.79713e-09	Aradu.3CD7I	sugar transporter protein 7	GO:0031224//intrinsic component of membrane;GO:0016021//integral component of membrane;GO:0044425//membrane part;GO:0016020//membrane	GO:0005215//transporter activity;GO:0022891//substrate-specific transmembrane transporter activity;GO:0022892//substrate-specific transporter activity;GO:0022857//transmembrane transporter activity	GO:0009987//cellular process;GO:0044763//single-organism cellular process;GO:0051234//establishment of localization;GO:1902578//single-organism localization;GO:0055085//transmembrane transport;GO:0051179//localization;GO:0006810//transport;GO:0044699//single-organism process;GO:0044765//single-organism transport	-	-	-	-
Aradu.3CJ36	39.6667	4.66667	11.5367	1.18667	-3.28124	9.09786e-21	8.95724e-20	Aradu.3CJ36	unknown protein; BEST Arabidopsis thaliana protein match is: unknown protein .	-	-	-	-	-	-	-
Aradu.3D0ZZ	72.1033	3.33333	2.65667	0.116667	-4.50915	3.82898e-29	5.11301e-28	Aradu.3D0ZZ	PREDICTED: protein IQ-DOMAIN 14-like isoform X1	-	GO:0005515//protein binding;GO:0005488//binding	-	-	-	-	-
Aradu.3F0JH	0.666667	7.43667	0.14	1.46333	3.38576	0.000137421	0.000438649	Aradu.3F0JH	late embryogenesis abundant protein	-	-	GO:0050896//response to stimulus;GO:0006950//response to stress	-	-	-	-
Aradu.3G22S	0.666667	32.6967	0.0466667	2.17667	5.54358	4.40567e-24	4.93914e-23	Aradu.3G22S	Seed maturation protein	-	-	-	-	-	-	-
Aradu.3HG4P	0	16.1333	0.001	1.02333	9.99906	4.45717e-10	2.44213e-09	Aradu.3HG4P	sieve element occlusion protein	-	-	-	-	-	-	-
Aradu.3IZ11	33.9367	8.19	1.07333	0.246667	-2.12146	1.29517e-11	7.90732e-11	Aradu.3IZ11	peptide transporter 1	GO:0016020//membrane	GO:0005215//transporter activity	GO:0044765//single-organism transport;GO:0006857//oligopeptide transport;GO:0051179//localization;GO:0015833//peptide transport;GO:0071705//nitrogen compound transport;GO:0044699//single-organism process;GO:1902578//single-organism localization;GO:0051234//establishment of localization;GO:0042886//amide transport;GO:0006810//transport;GO:0071702//organic substance transport	-	-	-	-
Aradu.3K9KE	26.9767	616.827	1.04667	21.8767	4.38552	2.58938e-260	5.61946e-258	Aradu.3K9KE	Cytochrome P450 superfamily protein	-	GO:0005488//binding;GO:0046914//transition metal ion binding;GO:1901363//heterocyclic compound binding;GO:0043169//cation binding;GO:0043167//ion binding;GO:0005506//iron ion binding;GO:0046906//tetrapyrrole binding;GO:0020037//heme binding;GO:0046872//metal ion binding;GO:0097159//organic cyclic compound binding	GO:0044710//single-organism metabolic process;GO:0044699//single-organism process;GO:0008152//metabolic process;GO:0055114//oxidation-reduction process	-	-	-	-
Aradu.3L0G1	80.4667	3904.47	5.25	230.58	5.45681	3.90537e-264	8.78175e-262	Aradu.3L0G1	1-aminocyclopropane-1-carboxylate oxidase	-	GO:0003824//catalytic activity;GO:0016491//oxidoreductase activity	GO:0044710//single-organism metabolic process;GO:0008152//metabolic process;GO:0055114//oxidation-reduction process;GO:0044699//single-organism process	Metabolism	Amino acid metabolism	ko00270//Cysteine and methionine metabolism	K05933
Aradu.3L3H2	23.3333	112	1.69333	7.61	2.16803	1.59939e-20	1.55633e-19	Aradu.3L3H2	Tetratricopeptide repeat (TPR)-like superfamily protein	-	GO:0005488//binding;GO:0005515//protein binding	-	-	-	-	-
Aradu.3L8EK	235.433	3438.79	13.7633	184.91	3.74792	0	0	Aradu.3L8EK	PREDICTED: isoflavone reductase homolog	-	-	-	-	-	-	-
Aradu.3LA4T	86.1367	16.3567	3.62	0.646667	-2.4849	5.83141e-28	7.48524e-27	Aradu.3LA4T	carotenoid cleavage dioxygenase 8	-	-	-	Metabolism	Metabolism of terpenoids and polyketides	ko00906//Carotenoid biosynthesis	K17913
Aradu.3LM76	344.787	86.7267	10.6633	2.44667	-2.12377	1.87622e-54	4.63395e-53	Aradu.3LM76	MATE efflux family protein	GO:0016020//membrane	GO:0015238//drug transmembrane transporter activity;GO:0022857//transmembrane transporter activity;GO:0015297//antiporter activity;GO:0022804//active transmembrane transporter activity;GO:0005215//transporter activity;GO:0015291//secondary active transmembrane transporter activity;GO:0090484//drug transporter activity	GO:0042493//response to drug;GO:0015893//drug transport;GO:0050896//response to stimulus;GO:0044699//single-organism process;GO:0044763//single-organism cellular process;GO:1902578//single-organism localization;GO:0051234//establishment of localization;GO:0006855//drug transmembrane transport;GO:0006810//transport;GO:0044765//single-organism transport;GO:0042221//response to chemical;GO:0009987//…	-	-	-	-
Aradu.3MD78	486.35	102.06	48.2067	9.34333	-2.36722	7.07533e-38	1.20266e-36	Aradu.3MD78	Pollen Ole e 1 allergen and extensin family protein	-	-	-	-	-	-	-
Aradu.3MX9T	7.75333	171.237	0.253333	5.08	4.32572	3.5293e-65	1.08101e-63	Aradu.3MX9T	receptor-like protein kinase 1	-	GO:0016773//phosphotransferase activity, alcohol group as acceptor;GO:0005488//binding;GO:0003824//catalytic activity;GO:0016301//kinase activity;GO:1901265//nucleoside phosphate binding;GO:0030554//adenyl nucleotide binding;GO:0000166//nucleotide binding;GO:0016740//transferase activity;GO:0032549//ribonucleoside binding;GO:0016772//transferase activity, transferring phosphorus-containing groups…	GO:0036211//protein modification process;GO:0043412//macromolecule modification;GO:0044267//cellular protein metabolic process;GO:0044238//primary metabolic process;GO:0043170//macromolecule metabolic process;GO:0006796//phosphate-containing compound metabolic process;GO:0071704//organic substance metabolic process;GO:0044260//cellular macromolecule metabolic process;GO:0019538//protein metabolic…	-	-	-	-
Aradu.3P5HB	528.533	115.17	17.6033	3.54333	-2.31267	4.05822e-124	2.74757e-122	Aradu.3P5HB	PREDICTED: probable pectinesterase/pectinesterase inhibitor 34-like	GO:0071944//cell periphery;GO:0005623//cell;GO:0030312//external encapsulating structure;GO:0044464//cell part;GO:0005618//cell wall	GO:0003824//catalytic activity;GO:0016787//hydrolase activity;GO:0004857//enzyme inhibitor activity;GO:0052689//carboxylic ester hydrolase activity;GO:0030234//enzyme regulator activity;GO:0016788//hydrolase activity, acting on ester bonds;GO:0030599//pectinesterase activity;GO:0098772//molecular function regulator	GO:0071554//cell wall organization or biogenesis;GO:0042545//cell wall modification;GO:0009987//cellular process;GO:0071840//cellular component organization or biogenesis;GO:0045229//external encapsulating structure organization;GO:0071555//cell wall organization;GO:0016043//cellular component organization	-	-	-	-
Aradu.3PC6T	3.29667	708.073	0.106667	20.33	7.57436	4.60299e-222	7.58018e-220	Aradu.3PC6T	phosphofructokinase 3	GO:0044444//cytoplasmic part;GO:1990234//transferase complex;GO:0005623//cell;GO:0043234//protein complex;GO:0005945//6-phosphofructokinase complex;GO:0044424//intracellular part;GO:0005737//cytoplasm;GO:0044445//cytosolic part;GO:0005622//intracellular;GO:0005829//cytosol;GO:1902494//catalytic complex;GO:0044464//cell part;GO:0032991//macromolecular complex	GO:0032549//ribonucleoside binding;GO:0032550//purine ribonucleoside binding;GO:0030554//adenyl nucleotide binding;GO:0016772//transferase activity, transferring phosphorus-containing groups;GO:0016740//transferase activity;GO:0016773//phosphotransferase activity, alcohol group as acceptor;GO:0003824//catalytic activity;GO:1901363//heterocyclic compound binding;GO:0001883//purine nucleoside bindi…	GO:0043436//oxoacid metabolic process;GO:0006139//nucleobase-containing compound metabolic process;GO:0006090//pyruvate metabolic process;GO:0032787//monocarboxylic acid metabolic process;GO:0006091//generation of precursor metabolites and energy;GO:0006796//phosphate-containing compound metabolic process;GO:1901135//carbohydrate derivative metabolic process;GO:0044238//primary metabolic process;…	Genetic Information Processing;Metabolism	Global and Overview;Folding, sorting and degradation;Carbohydrate metabolism	ko01200//Carbon metabolism;ko01230//Biosynthesis of amino acids;ko00010//Glycolysis / Gluconeogenesis;ko03018//RNA degradation;ko00052//Galactose metabolism;ko00051//Fructose and mannose metabolism;ko00030//Pentose phosphate pathway	K00850
Aradu.3Q340	9.30667	164.353	0.856667	14.12	4.04286	1.44653e-59	3.93743e-58	Aradu.3Q340	Lactoylglutathione lyase / glyoxalase I family protein	-	-	-	-	-	-	-
Aradu.3R22E	0	11.3333	0.001	1.75	10.7731	8.51483e-10	4.56442e-09	Aradu.3R22E	ethylene-responsive transcription factor 1B	-	GO:0003677//DNA binding;GO:0001071//nucleic acid binding transcription factor activity;GO:0003700//sequence-specific DNA binding transcription factor activity;GO:0097159//organic cyclic compound binding;GO:0003676//nucleic acid binding;GO:0005488//binding;GO:1901363//heterocyclic compound binding	-	Environmental Information Processing	Signal transduction	ko04075//Plant hormone signal transduction	K14516
Aradu.3R43N	150.407	698.177	4.29667	18.31	2.09134	3.49619e-47	7.46588e-46	Aradu.3R43N	NAD(P)-binding Rossmann-fold superfamily protein	-	GO:0003824//catalytic activity;GO:0005488//binding;GO:0050662//coenzyme binding;GO:0048037//cofactor binding	GO:0008152//metabolic process;GO:0009987//cellular process;GO:0044237//cellular metabolic process	-	-	-	-
Aradu.3S0EJ	21.5867	3.66333	5.56667	0.896667	-2.63417	9.84651e-10	5.25714e-09	Aradu.3S0EJ	PREDICTED: uncharacterized protein LOC100810027	-	-	-	-	-	-	-
Aradu.3S81N	4341.81	1133.58	312.87	75.0667	-2.05932	1.14714e-79	4.41137e-78	Aradu.3S81N	2-oxoglutarate (2OG) and Fe(II)-dependent oxygenase superfamily protein	-	GO:0016491//oxidoreductase activity;GO:0003824//catalytic activity	GO:0008152//metabolic process;GO:0044710//single-organism metabolic process;GO:0044699//single-organism process;GO:0055114//oxidation-reduction process	-	-	-	-
Aradu.3SF6Q	98.0167	9	2.92	0.25	-3.54597	3.66429e-40	6.5822e-39	Aradu.3SF6Q	Mitochondrial substrate carrier family protein	-	-	-	-	-	-	-
Aradu.3TT1Y	0	24.3333	0.001	0.963333	9.91189	1.54229e-18	1.37814e-17	Aradu.3TT1Y	Cytochrome P450 superfamily protein	-	GO:0046914//transition metal ion binding;GO:0097159//organic cyclic compound binding;GO:0005488//binding;GO:1901363//heterocyclic compound binding;GO:0043169//cation binding;GO:0020037//heme binding;GO:0005506//iron ion binding;GO:0046872//metal ion binding;GO:0046906//tetrapyrrole binding;GO:0043167//ion binding	GO:0008152//metabolic process;GO:0044710//single-organism metabolic process;GO:0044699//single-organism process;GO:0055114//oxidation-reduction process	Metabolism	Biosynthesis of other secondary metabolites;Global and Overview;Metabolism of other amino acids	ko00460//Cyanoamino acid metabolism;ko01210//2-Oxocarboxylic acid metabolism;ko00966//Glucosinolate biosynthesis	K12153
Aradu.3V07T	23.6667	134.64	0.793333	4.09667	2.36845	1.77342e-40	3.21554e-39	Aradu.3V07T	Phosphoglycerate mutase family protein	-	-	-	-	-	-	-
Aradu.3V9TC	1.33333	9.84667	0.0433333	0.273333	2.65711	0.000216062	0.000670856	Aradu.3V9TC	phosphate transporter 4;1	GO:0016020//membrane;GO:0044425//membrane part;GO:0031224//intrinsic component of membrane;GO:0016021//integral component of membrane	-	GO:0055085//transmembrane transport;GO:1902578//single-organism localization;GO:0044699//single-organism process;GO:0009987//cellular process;GO:0044763//single-organism cellular process;GO:0051234//establishment of localization;GO:0006810//transport;GO:0051179//localization;GO:0044765//single-organism transport	-	-	-	-
Aradu.3VR18	22.1733	5.27333	1.11	0.26	-2.09398	2.72e-07	1.17648e-06	Aradu.3VR18	PREDICTED: uncharacterized protein LOC100791257	-	-	-	-	-	-	-
Aradu.3WC73	3.14333	63.02	0.116667	2.10333	4.17221	3.25477e-32	4.77437e-31	Aradu.3WC73	Cytochrome P450 superfamily protein	-	GO:0005506//iron ion binding;GO:0046906//tetrapyrrole binding;GO:0043167//ion binding;GO:0046872//metal ion binding;GO:0020037//heme binding;GO:0005488//binding;GO:0097159//organic cyclic compound binding;GO:1901363//heterocyclic compound binding;GO:0043169//cation binding;GO:0046914//transition metal ion binding	GO:0044710//single-organism metabolic process;GO:0044699//single-organism process;GO:0008152//metabolic process;GO:0055114//oxidation-reduction process	-	-	-	-
Aradu.3WL67	23.3333	4.66667	15.3433	2.88	-2.41347	6.37528e-09	3.19826e-08	Aradu.3WL67	Calcium-binding EF-hand family protein	-	GO:0043169//cation binding;GO:0005488//binding;GO:0005509//calcium ion binding;GO:0046872//metal ion binding;GO:0043167//ion binding	-	-	-	-	-
Aradu.3XQ8Y	0	8	0.001	0.546667	9.09452	4.65581e-06	1.77989e-05	Aradu.3XQ8Y	PREDICTED: putative DNA-binding protein ESCAROLA-like	-	-	-	-	-	-	-
Aradu.3Y26A	6.56667	65.7633	0.446667	4.16333	3.22047	1.57702e-26	1.92331e-25	Aradu.3Y26A	proton pump interactor, putative	-	-	-	-	-	-	-
Aradu.3YJ2J	3.00333	20.9233	0.126667	0.82	2.69459	6.29281e-08	2.89445e-07	Aradu.3YJ2J	late embryogenesis abundant protein, putative / LEA protein, putative	-	-	-	-	-	-	-
Aradu.3ZR52	526.677	125.937	24.2233	5.27667	-2.1987	3.18507e-78	1.19849e-76	Aradu.3ZR52	zinc finger protein CONSTANS-LIKE 5-like	GO:0005622//intracellular;GO:0005623//cell;GO:0044464//cell part	GO:0046914//transition metal ion binding;GO:0008270//zinc ion binding;GO:0043169//cation binding;GO:0005488//binding;GO:0046872//metal ion binding;GO:0043167//ion binding	-	-	-	-	-
Aradu.401JR	4.46	0.333333	0.106667	0.00666667	-4	0.00173053	0.00467697	Aradu.401JR	phospholipase D P2	GO:0016020//membrane	GO:0005515//protein binding;GO:0003824//catalytic activity;GO:0005488//binding;GO:0046872//metal ion binding;GO:0008081//phosphoric diester hydrolase activity;GO:0043169//cation binding;GO:0043167//ion binding;GO:0016298//lipase activity;GO:0042578//phosphoric ester hydrolase activity;GO:0005509//calcium ion binding;GO:0004630//phospholipase D activity;GO:0016787//hydrolase activity;GO:0016788//h…	GO:0044237//cellular metabolic process;GO:0044710//single-organism metabolic process;GO:0006650//glycerophospholipid metabolic process;GO:0006796//phosphate-containing compound metabolic process;GO:0097164//ammonium ion metabolic process;GO:0009308//amine metabolic process;GO:0044281//small molecule metabolic process;GO:0044763//single-organism cellular process;GO:0071704//organic substance metab…	Cellular Processes;Metabolism	Transport and catabolism;Lipid metabolism	ko04144//Endocytosis;ko00564//Glycerophospholipid metabolism;ko00565//Ether lipid metabolism	K01115
Aradu.40JMZ	8	1	0.396667	0.0433333	-3.19438	5.17666e-05	0.000174606	Aradu.40JMZ	3-ketoacyl-CoA synthase 19	GO:0016020//membrane	GO:0003824//catalytic activity	GO:0008610//lipid biosynthetic process;GO:0006633//fatty acid biosynthetic process;GO:0046394//carboxylic acid biosynthetic process;GO:0044237//cellular metabolic process;GO:0006631//fatty acid metabolic process;GO:0044255//cellular lipid metabolic process;GO:0006082//organic acid metabolic process;GO:0044711//single-organism biosynthetic process;GO:0071704//organic substance metabolic process;GO…	Metabolism	Lipid metabolism	ko00062//Fatty acid elongation	K15397
Aradu.4196P	60.7433	832.337	3.99	50.13	3.65121	3.16679e-67	1.00176e-65	Aradu.4196P	Chitinase family protein	-	GO:0016798//hydrolase activity, acting on glycosyl bonds;GO:0004568//chitinase activity;GO:0004553//hydrolase activity, hydrolyzing O-glycosyl compounds;GO:0003824//catalytic activity;GO:0016787//hydrolase activity	GO:0044036//cell wall macromolecule metabolic process;GO:0016998//cell wall macromolecule catabolic process;GO:0043170//macromolecule metabolic process;GO:0009987//cellular process;GO:0071704//organic substance metabolic process;GO:0006030//chitin metabolic process;GO:0006032//chitin catabolic process;GO:0009056//catabolic process;GO:1901136//carbohydrate derivative catabolic process;GO:0044260//…	Metabolism	Carbohydrate metabolism	ko00520//Amino sugar and nucleotide sugar metabolism	K01183
Aradu.4262U	7.20667	179.063	0.463333	10.44	4.49393	1.45601e-78	5.5158e-77	Aradu.4262U	Cytochrome P450 superfamily protein	-	GO:0020037//heme binding;GO:0043167//ion binding;GO:0005506//iron ion binding;GO:1901363//heterocyclic compound binding;GO:0005488//binding;GO:0046914//transition metal ion binding;GO:0046872//metal ion binding;GO:0046906//tetrapyrrole binding;GO:0043169//cation binding;GO:0097159//organic cyclic compound binding	GO:0044710//single-organism metabolic process;GO:0055114//oxidation-reduction process;GO:0044699//single-organism process;GO:0008152//metabolic process	-	-	-	-
Aradu.427SB	2.1	55.0567	0.0933333	2.23667	4.58281	1.17791e-26	1.44505e-25	Aradu.427SB	Cytochrome P450 superfamily protein	-	GO:0043167//ion binding;GO:1901363//heterocyclic compound binding;GO:0043169//cation binding;GO:0097159//organic cyclic compound binding;GO:0005506//iron ion binding;GO:0005488//binding;GO:0046914//transition metal ion binding;GO:0046906//tetrapyrrole binding;GO:0046872//metal ion binding;GO:0020037//heme binding	GO:0044710//single-organism metabolic process;GO:0055114//oxidation-reduction process;GO:0008152//metabolic process;GO:0044699//single-organism process	-	-	-	-
Aradu.42SWI	1.97333	10.3967	0.133333	0.623333	2.22497	0.000425435	0.00126416	Aradu.42SWI	fatty acid desaturase 5	-	-	GO:0044699//single-organism process;GO:0055114//oxidation-reduction process;GO:0044710//single-organism metabolic process;GO:0071704//organic substance metabolic process;GO:0044238//primary metabolic process;GO:0006629//lipid metabolic process;GO:0008152//metabolic process	Metabolism	Global and Overview;Lipid metabolism	ko01212//Fatty acid metabolism;ko01040//Biosynthesis of unsaturated fatty acids	K00507
Aradu.43BHZ	15.8233	87.1833	1.75667	8.77333	2.32028	8.54104e-23	9.11592e-22	Aradu.43BHZ	Protein of unknown function (DUF581)	-	-	-	-	-	-	-
Aradu.43BK3	108.33	22.3333	2.59	0.496667	-2.3826	7.32228e-30	9.99956e-29	Aradu.43BK3	nodulin MtN21 /EamA-like transporter family protein	GO:0016020//membrane	-	-	-	-	-	-
Aradu.43MX5	11.0333	3	0.483333	0.113333	-2.09245	0.000442016	0.00130974	Aradu.43MX5	DNAJ homologue 2	-	-	-	-	-	-	-
Aradu.43TRE	4920.14	641.917	285.797	34.0533	-3.06912	0	0	Aradu.43TRE	PREDICTED: lysine-rich arabinogalactan protein 18-like	-	-	-	-	-	-	-
Aradu.440M4	0	24.4033	0.001	3.37	11.7185	3.22293e-15	2.44884e-14	Aradu.440M4	Defensin related	-	-	GO:0006950//response to stress;GO:0050896//response to stimulus;GO:0006952//defense response	-	-	-	-
Aradu.44QR7	7.99667	44.9133	0.336667	1.71333	2.34741	7.91311e-15	5.88475e-14	Aradu.44QR7	AT hook motif DNA-binding family protein	-	GO:0005488//binding;GO:1901363//heterocyclic compound binding;GO:0003677//DNA binding;GO:0003676//nucleic acid binding;GO:0097159//organic cyclic compound binding	-	-	-	-	-
Aradu.45S52	5.22667	28.6233	0.23	1.17	2.3468	1.25907e-10	7.17595e-10	Aradu.45S52	PREDICTED: UPF0481 protein	-	-	-	-	-	-	-
Aradu.45WUM	13.4733	2064.57	1.38667	194.21	7.12985	0	0	Aradu.45WUM	Glutathione S-transferase family protein	-	GO:0005515//protein binding;GO:0005488//binding	-	Metabolism	Metabolism of other amino acids	ko00480//Glutathione metabolism	K00799
Aradu.464FL	38.93	9.14	2.14	0.453333	-2.23897	1.39329e-09	7.34437e-09	Aradu.464FL	PPPDE putative thiol peptidase family protein	-	-	-	-	-	-	-
Aradu.46DEV	31.3567	270.747	1.49667	11.8967	2.99073	9.81444e-93	4.59465e-91	Aradu.46DEV	glutamate decarboxylase	-	GO:0048037//cofactor binding;GO:0097159//organic cyclic compound binding;GO:0005488//binding;GO:0043168//anion binding;GO:0030170//pyridoxal phosphate binding;GO:0016829//lyase activity;GO:0043167//ion binding;GO:1901363//heterocyclic compound binding;GO:0003824//catalytic activity;GO:0004351//glutamate decarboxylase activity;GO:0016831//carboxy-lyase activity;GO:0016830//carbon-carbon lyase acti…	GO:0044763//single-organism cellular process;GO:0043436//oxoacid metabolic process;GO:0006082//organic acid metabolic process;GO:0044710//single-organism metabolic process;GO:0043648//dicarboxylic acid metabolic process;GO:0006536//glutamate metabolic process;GO:0008152//metabolic process;GO:0009987//cellular process;GO:0006520//cellular amino acid metabolic process;GO:0009064//glutamine family a…	Metabolism	Metabolism of other amino acids;Carbohydrate metabolism;Amino acid metabolism	ko00250//Alanine, aspartate and glutamate metabolism;ko00410//beta-Alanine metabolism;ko00650//Butanoate metabolism;ko00430//Taurine and hypotaurine metabolism	K01580
Aradu.46JQQ	102.73	21.8467	0.75	0.146667	-2.35435	2.80933e-31	4.01678e-30	Aradu.46JQQ	Disease resistance protein (TIR-NBS-LRR class) family	-	GO:0001883//purine nucleoside binding;GO:0032549//ribonucleoside binding;GO:0017076//purine nucleotide binding;GO:0032550//purine ribonucleoside binding;GO:0097159//organic cyclic compound binding;GO:0097367//carbohydrate derivative binding;GO:0000166//nucleotide binding;GO:1901363//heterocyclic compound binding;GO:0030554//adenyl nucleotide binding;GO:0043168//anion binding;GO:0036094//small mol…	GO:0006952//defense response;GO:0006950//response to stress;GO:0050896//response to stimulus	-	-	-	-
Aradu.46T7Q	11.21	88.1833	2.51	17.91	2.83501	4.86857e-33	7.30233e-32	Aradu.46T7Q	NAD(P)-binding Rossmann-fold superfamily protein	-	GO:0003824//catalytic activity;GO:0016491//oxidoreductase activity	GO:0008152//metabolic process	Metabolism	Metabolism of terpenoids and polyketides	ko00902//Monoterpenoid biosynthesis	K15095
Aradu.46Z90	120.983	1945.15	1.53667	22.58	3.87717	0	0	Aradu.46Z90	ATP-binding ABC transporter	GO:0016021//integral component of membrane;GO:0016020//membrane;GO:0031224//intrinsic component of membrane;GO:0044425//membrane part	GO:0032555//purine ribonucleotide binding;GO:0016462//pyrophosphatase activity;GO:0001882//nucleoside binding;GO:0036094//small molecule binding;GO:0030554//adenyl nucleotide binding;GO:1901363//heterocyclic compound binding;GO:0043168//anion binding;GO:0005488//binding;GO:0003824//catalytic activity;GO:0000166//nucleotide binding;GO:0017076//purine nucleotide binding;GO:0032550//purine ribonucle…	GO:0051179//localization;GO:0044699//single-organism process;GO:0055085//transmembrane transport;GO:0044765//single-organism transport;GO:1902578//single-organism localization;GO:0009987//cellular process;GO:0044763//single-organism cellular process;GO:0051234//establishment of localization;GO:0006810//transport	-	-	-	-
Aradu.47LJL	94.26	17	7.26	1.18	-2.62118	1.62694e-37	2.73802e-36	Aradu.47LJL	NB-ARC domain disease resistance protein	-	GO:0097367//carbohydrate derivative binding;GO:0001883//purine nucleoside binding;GO:0036094//small molecule binding;GO:1901265//nucleoside phosphate binding;GO:0001882//nucleoside binding;GO:0043168//anion binding;GO:0032550//purine ribonucleoside binding;GO:0032559//adenyl ribonucleotide binding;GO:0000166//nucleotide binding;GO:0043531//ADP binding;GO:0030554//adenyl nucleotide binding;GO:0032…	-	Organismal Systems	Environmental adaptation	ko04626//Plant-pathogen interaction	K13459
Aradu.47ZJ4	36.6167	5	1.30333	0.163333	-2.99631	1.90877e-12	1.23098e-11	Aradu.47ZJ4	myosin-related	-	-	-	-	-	-	-
Aradu.482TA	1	49.3033	0.05	2.38667	5.57693	3.89161e-31	5.543e-30	Aradu.482TA	UDP-Glycosyltransferase superfamily protein	-	-	GO:0008152//metabolic process	-	-	-	-
Aradu.48NC1	20.1367	2.33333	2.4	0.243333	-3.30203	5.36355e-11	3.13076e-10	Aradu.48NC1	PREDICTED: uncharacterized protein LOC100306573 isoform X4	-	-	-	-	-	-	-
Aradu.492LT	22.62	4.71667	1.29667	0.23	-2.4951	1.38663e-08	6.76058e-08	Aradu.492LT	alpha/beta-Hydrolases superfamily protein	-	GO:0003824//catalytic activity	-	-	-	-	-
Aradu.4967G	23.2667	504.473	0.876667	17.56	4.32412	5.95117e-203	8.39325e-201	Aradu.4967G	PREDICTED: uncharacterized protein LOC100805495 isoform X2	-	-	-	-	-	-	-
Aradu.496HJ	137.653	34.12	5.35667	1.21667	-2.1384	6.98052e-35	1.09542e-33	Aradu.496HJ	PREDICTED: remorin-like	-	-	-	-	-	-	-
Aradu.4AG6X	7.53	46.0867	0.65	3.66667	2.49596	4.98218e-17	4.14745e-16	Aradu.4AG6X	Peroxidase superfamily protein	-	GO:0020037//heme binding;GO:0004601//peroxidase activity;GO:0016491//oxidoreductase activity;GO:1901363//heterocyclic compound binding;GO:0046906//tetrapyrrole binding;GO:0016209//antioxidant activity;GO:0097159//organic cyclic compound binding;GO:0005488//binding;GO:0016684//oxidoreductase activity, acting on peroxide as acceptor;GO:0003824//catalytic activity	GO:0044699//single-organism process;GO:0008152//metabolic process;GO:0006979//response to oxidative stress;GO:0006950//response to stress;GO:0044710//single-organism metabolic process;GO:0055114//oxidation-reduction process;GO:0050896//response to stimulus	Metabolism	Biosynthesis of other secondary metabolites	ko00940//Phenylpropanoid biosynthesis	K00430
Aradu.4B6GH	11.5467	410.923	0.5	16.3167	5.02827	7.02321e-106	3.90891e-104	Aradu.4B6GH	Cytochrome P450 superfamily protein	-	GO:0020037//heme binding;GO:0046914//transition metal ion binding;GO:0005488//binding;GO:0046872//metal ion binding;GO:1901363//heterocyclic compound binding;GO:0043169//cation binding;GO:0005506//iron ion binding;GO:0043167//ion binding;GO:0046906//tetrapyrrole binding;GO:0097159//organic cyclic compound binding	GO:0008152//metabolic process;GO:0044699//single-organism process;GO:0044710//single-organism metabolic process;GO:0055114//oxidation-reduction process	-	-	-	-
Aradu.4D0SU	6	0.333333	0.176667	0.01	-4.14296	0.000312625	0.000948377	Aradu.4D0SU	PREDICTED: uncharacterized protein LOC100788333 isoform X1	-	-	-	-	-	-	-
Aradu.4E5EC	13	1	7.25333	0.513333	-3.82068	1.03748e-06	4.24011e-06	Aradu.4E5EC	Unknown protein	-	-	-	-	-	-	-
Aradu.4F9D9	21.17	5.30667	0.183333	0.04	-2.1964	9.0599e-07	3.72474e-06	Aradu.4F9D9	PREDICTED: RNA-directed DNA polymerase homolog	-	GO:0016772//transferase activity, transferring phosphorus-containing groups;GO:0097159//organic cyclic compound binding;GO:1901363//heterocyclic compound binding;GO:0016779//nucleotidyltransferase activity;GO:0034061//DNA polymerase activity;GO:0003723//RNA binding;GO:0005488//binding;GO:0003964//RNA-directed DNA polymerase activity;GO:0003676//nucleic acid binding;GO:0016740//transferase activit…	GO:0006139//nucleobase-containing compound metabolic process;GO:0090304//nucleic acid metabolic process;GO:0044260//cellular macromolecule metabolic process;GO:0034641//cellular nitrogen compound metabolic process;GO:0043170//macromolecule metabolic process;GO:0009987//cellular process;GO:0044249//cellular biosynthetic process;GO:0071704//organic substance metabolic process;GO:0008152//metabolic …	-	-	-	-
Aradu.4G0ZP	5559.66	37068.4	38.9567	239.993	2.62305	1.04167e-288	2.77734e-286	Aradu.4G0ZP	pleiotropic drug resistance 12	GO:0016020//membrane	GO:0030554//adenyl nucleotide binding;GO:0043167//ion binding;GO:0000166//nucleotide binding;GO:0097159//organic cyclic compound binding;GO:0032549//ribonucleoside binding;GO:0043168//anion binding;GO:0032550//purine ribonucleoside binding;GO:0032555//purine ribonucleotide binding;GO:0016462//pyrophosphatase activity;GO:0016887//ATPase activity;GO:0005488//binding;GO:0097367//carbohydrate derivat…	-	-	-	-	-
Aradu.4HW6H	4.99333	0.666667	0.296667	0.03	-3.30581	0.00305177	0.00789865	Aradu.4HW6H	phytochelatin synthase 2	-	GO:0005488//binding;GO:0043167//ion binding;GO:0016756//glutathione gamma-glutamylcysteinyltransferase activity;GO:0016740//transferase activity;GO:0016746//transferase activity, transferring acyl groups;GO:0003824//catalytic activity;GO:0046872//metal ion binding;GO:0043169//cation binding;GO:0016755//transferase activity, transferring amino-acyl groups	GO:0006807//nitrogen compound metabolic process;GO:0010038//response to metal ion;GO:0043604//amide biosynthetic process;GO:0009987//cellular process;GO:1901576//organic substance biosynthetic process;GO:0019748//secondary metabolic process;GO:0044763//single-organism cellular process;GO:0044550//secondary metabolite biosynthetic process;GO:0042221//response to chemical;GO:0034641//cellular nitro…	-	-	-	-
Aradu.4K1X7	157.517	41.34	5.15	1.25667	-2.03497	7.60061e-31	1.07276e-29	Aradu.4K1X7	receptor-like protein kinase 4	-	GO:0016740//transferase activity;GO:0097367//carbohydrate derivative binding;GO:0097159//organic cyclic compound binding;GO:0016772//transferase activity, transferring phosphorus-containing groups;GO:0005524//ATP binding;GO:0001883//purine nucleoside binding;GO:0043168//anion binding;GO:0043167//ion binding;GO:0016301//kinase activity;GO:0000166//nucleotide binding;GO:1901363//heterocyclic compou…	GO:0043412//macromolecule modification;GO:0044238//primary metabolic process;GO:0044237//cellular metabolic process;GO:0036211//protein modification process;GO:0006468//protein phosphorylation;GO:0044267//cellular protein metabolic process;GO:0006464//cellular protein modification process;GO:0009987//cellular process;GO:0008152//metabolic process;GO:0043170//macromolecule metabolic process;GO:000…	-	-	-	-
Aradu.4M7RM	37.4733	343.587	3.55333	29.5533	3.05608	9.59941e-88	4.20235e-86	Aradu.4M7RM	Thioredoxin superfamily protein	-	GO:0015036//disulfide oxidoreductase activity;GO:0015035//protein disulfide oxidoreductase activity;GO:0016667//oxidoreductase activity, acting on a sulfur group of donors;GO:0016491//oxidoreductase activity;GO:0003824//catalytic activity	GO:0065008//regulation of biological quality;GO:0044281//small molecule metabolic process;GO:0019725//cellular homeostasis;GO:0009987//cellular process;GO:0044710//single-organism metabolic process;GO:0018904//ether metabolic process;GO:0044763//single-organism cellular process;GO:0050789//regulation of biological process;GO:0071704//organic substance metabolic process;GO:0044699//single-organism…	-	-	-	-
Aradu.4M95U	8.33	2.33333	0.72	0.176667	-2.02697	0.000944833	0.00266389	Aradu.4M95U	Heavy metal transport/detoxification superfamily protein	-	GO:0043167//ion binding;GO:0005488//binding;GO:0046872//metal ion binding;GO:0043169//cation binding	GO:0006810//transport;GO:0044699//single-organism process;GO:0051234//establishment of localization;GO:0051179//localization;GO:0006811//ion transport;GO:0044765//single-organism transport;GO:0030001//metal ion transport;GO:0006812//cation transport;GO:1902578//single-organism localization	-	-	-	-
Aradu.4N10P	190.223	33.03	7.06333	1.14667	-2.6229	5.94366e-45	1.20796e-43	Aradu.4N10P	organic cation/carnitine transporter 2	GO:0031224//intrinsic component of membrane;GO:0044425//membrane part;GO:0016020//membrane;GO:0016021//integral component of membrane	GO:0005215//transporter activity;GO:0022857//transmembrane transporter activity	GO:0044699//single-organism process;GO:0051179//localization;GO:0051234//establishment of localization;GO:1902578//single-organism localization;GO:0006810//transport;GO:0009987//cellular process;GO:0044763//single-organism cellular process;GO:0044765//single-organism transport;GO:0055085//transmembrane transport	-	-	-	-
Aradu.4RE2S	241.183	2457.12	9.74667	91.4833	3.23053	4.27983e-297	1.1863e-294	Aradu.4RE2S	12-oxophytodienoate reductase 2	-	GO:0005488//binding;GO:0032553//ribonucleotide binding;GO:0010181//FMN binding;GO:1901363//heterocyclic compound binding;GO:0043168//anion binding;GO:0097367//carbohydrate derivative binding;GO:0048037//cofactor binding;GO:0000166//nucleotide binding;GO:1901265//nucleoside phosphate binding;GO:0050662//coenzyme binding;GO:0016491//oxidoreductase activity;GO:0043167//ion binding;GO:0003824//cataly…	GO:0044699//single-organism process;GO:0055114//oxidation-reduction process;GO:0008152//metabolic process;GO:0044710//single-organism metabolic process	Metabolism	Lipid metabolism	ko00592//alpha-Linolenic acid metabolism	K05894
Aradu.4SM4Z	68.1633	18.31	1.18667	0.296667	-2	4.51002e-20	4.31806e-19	Aradu.4SM4Z	LRR and NB-ARC domain disease resistance protein	-	GO:0043531//ADP binding;GO:0097159//organic cyclic compound binding;GO:0032550//purine ribonucleoside binding;GO:0030554//adenyl nucleotide binding;GO:0032555//purine ribonucleotide binding;GO:0000166//nucleotide binding;GO:0001882//nucleoside binding;GO:0097367//carbohydrate derivative binding;GO:0032549//ribonucleoside binding;GO:0032553//ribonucleotide binding;GO:1901363//heterocyclic compound…	GO:0050896//response to stimulus;GO:0006952//defense response;GO:0006950//response to stress	-	-	-	-
Aradu.4T5J3	115.23	606.43	4.42667	21.5033	2.28027	4.50869e-91	2.06415e-89	Aradu.4T5J3	Cytochrome P450 superfamily protein	-	GO:0005506//iron ion binding;GO:1901363//heterocyclic compound binding;GO:0043167//ion binding;GO:0097159//organic cyclic compound binding;GO:0020037//heme binding;GO:0005488//binding;GO:0046914//transition metal ion binding;GO:0046872//metal ion binding;GO:0043169//cation binding;GO:0046906//tetrapyrrole binding	GO:0008152//metabolic process;GO:0055114//oxidation-reduction process;GO:0044710//single-organism metabolic process;GO:0044699//single-organism process	-	-	-	-
Aradu.4T64T	23.44	107.75	2.04	8.54	2.06567	1.09799e-25	1.30221e-24	Aradu.4T64T	Phosphoglycerate mutase family protein	-	-	-	-	-	-	-
Aradu.4T8J3	492.18	131.547	16.8933	4.15	-2.02527	1.00611e-81	4.00094e-80	Aradu.4T8J3	PREDICTED: heparanase-like protein 1-like isoform X2	GO:0016020//membrane	-	GO:0008152//metabolic process;GO:0044238//primary metabolic process;GO:0071704//organic substance metabolic process;GO:0005975//carbohydrate metabolic process	Metabolism	Glycan biosynthesis and metabolism	ko00531//Glycosaminoglycan degradation	K07964
Aradu.4XL1L	8.11	43.5633	0.496667	2.43333	2.29258	8.92403e-12	5.50111e-11	Aradu.4XL1L	homogentisate phytyltransferase 1	GO:0044425//membrane part;GO:0016021//integral component of membrane;GO:0016020//membrane;GO:0031224//intrinsic component of membrane	GO:0004659//prenyltransferase activity;GO:0016765//transferase activity, transferring alkyl or aryl (other than methyl) groups;GO:0016740//transferase activity;GO:0003824//catalytic activity	-	Metabolism	Metabolism of cofactors and vitamins	ko00130//Ubiquinone and other terpenoid-quinone biosynthesis	K09833
Aradu.4YQ11	8.33333	0.666667	0.38	0.03	-3.66297	5.89787e-06	2.22615e-05	Aradu.4YQ11	Eukaryotic aspartyl protease family protein	-	GO:0008233//peptidase activity;GO:0004175//endopeptidase activity;GO:0016787//hydrolase activity;GO:0004190//aspartic-type endopeptidase activity;GO:0003824//catalytic activity;GO:0070011//peptidase activity, acting on L-amino acid peptides;GO:0070001//aspartic-type peptidase activity	GO:0008152//metabolic process;GO:0071704//organic substance metabolic process;GO:0044238//primary metabolic process;GO:0019538//protein metabolic process;GO:0043170//macromolecule metabolic process;GO:0006508//proteolysis	-	-	-	-
Aradu.4Z3ES	1.33333	40.5	0.0166667	0.496667	4.89724	1.44776e-23	1.58881e-22	Aradu.4Z3ES	Protein kinase superfamily protein	-	GO:0032555//purine ribonucleotide binding;GO:0032549//ribonucleoside binding;GO:0016772//transferase activity, transferring phosphorus-containing groups;GO:0016740//transferase activity;GO:0016301//kinase activity;GO:0035639//purine ribonucleoside triphosphate binding;GO:0001882//nucleoside binding;GO:0043167//ion binding;GO:0017076//purine nucleotide binding;GO:0001883//purine nucleoside binding…	GO:0044267//cellular protein metabolic process;GO:0044706//multi-multicellular organism process;GO:0008152//metabolic process;GO:0044238//primary metabolic process;GO:0044699//single-organism process;GO:0008037//cell recognition;GO:0009987//cellular process;GO:0044763//single-organism cellular process;GO:0019538//protein metabolic process;GO:0044237//cellular metabolic process;GO:0044703//multi-o…	-	-	-	-
Aradu.4Z7GD	47.3033	469.077	4.98333	45.4733	3.18984	3.50177e-130	2.55963e-128	Aradu.4Z7GD	leguminosin group485 secreted peptide	-	-	-	-	-	-	-
Aradu.50ZYK	1345.66	289.28	20.98	4.18	-2.32744	1.27344e-99	6.56548e-98	Aradu.50ZYK	Signal transduction histidine kinase	GO:0016020//membrane	GO:0097159//organic cyclic compound binding;GO:0016772//transferase activity, transferring phosphorus-containing groups;GO:0004872//receptor activity;GO:0000156//phosphorelay response regulator activity;GO:0005057//receptor signaling protein activity;GO:0032553//ribonucleotide binding;GO:0004673//protein histidine kinase activity;GO:0032549//ribonucleoside binding;GO:0035639//purine ribonucleosid…	GO:0065007//biological regulation;GO:0009987//cellular process;GO:0044699//single-organism process;GO:0035556//intracellular signal transduction;GO:0000160//phosphorelay signal transduction system;GO:0044237//cellular metabolic process;GO:0044763//single-organism cellular process;GO:0050789//regulation of biological process;GO:0007165//signal transduction;GO:0016310//phosphorylation;GO:0044700//s…	-	-	-	-
Aradu.5133E	421.163	96.9367	6.57	1.4	-2.23047	4.59301e-89	2.05241e-87	Aradu.5133E	LRR and NB-ARC domain disease resistance protein	-	GO:0043531//ADP binding;GO:1901265//nucleoside phosphate binding;GO:0043167//ion binding;GO:0032549//ribonucleoside binding;GO:0097159//organic cyclic compound binding;GO:0032553//ribonucleotide binding;GO:0097367//carbohydrate derivative binding;GO:0030554//adenyl nucleotide binding;GO:0001882//nucleoside binding;GO:1901363//heterocyclic compound binding;GO:0017076//purine nucleotide binding;GO:…	GO:0050896//response to stimulus;GO:0006952//defense response;GO:0006950//response to stress	-	-	-	-
Aradu.51F84	457.473	25779	23.3733	1207.58	5.69112	0	0	Aradu.51F84	PREDICTED: chalcone synthase	-	GO:0003824//catalytic activity	GO:0008152//metabolic process;GO:0009058//biosynthetic process	Organismal Systems;Metabolism	Environmental adaptation;Biosynthesis of other secondary metabolites	ko04712//Circadian rhythm - plant;ko00941//Flavonoid biosynthesis	K00660
Aradu.51TEZ	9.66667	178.267	0.48	8.04333	4.06669	6.40811e-91	2.92895e-89	Aradu.51TEZ	nudix hydrolase homolog 2	-	GO:0016787//hydrolase activity;GO:0003824//catalytic activity	-	-	-	-	-
Aradu.51XRF	58.8233	5.19333	1.75	0.136667	-3.67862	1.32888e-26	1.62599e-25	Aradu.51XRF	glutamate carboxypeptidase, putative	-	GO:0016787//hydrolase activity;GO:0003824//catalytic activity;GO:0008233//peptidase activity	GO:0071704//organic substance metabolic process;GO:0044238//primary metabolic process;GO:0008152//metabolic process;GO:0043170//macromolecule metabolic process;GO:0006508//proteolysis;GO:0019538//protein metabolic process	-	-	-	-
Aradu.52Q7K	726.107	4776.32	58.0933	350.567	2.59324	3.38736e-169	3.59208e-167	Aradu.52Q7K	Peroxidase superfamily protein	-	GO:0005488//binding;GO:0020037//heme binding;GO:0016491//oxidoreductase activity;GO:0046906//tetrapyrrole binding;GO:0016684//oxidoreductase activity, acting on peroxide as acceptor;GO:0097159//organic cyclic compound binding;GO:1901363//heterocyclic compound binding;GO:0003824//catalytic activity;GO:0016209//antioxidant activity;GO:0004601//peroxidase activity	GO:0055114//oxidation-reduction process;GO:0050896//response to stimulus;GO:0006979//response to oxidative stress;GO:0044710//single-organism metabolic process;GO:0044699//single-organism process;GO:0008152//metabolic process;GO:0006950//response to stress	Metabolism	Biosynthesis of other secondary metabolites	ko00940//Phenylpropanoid biosynthesis	K00430
Aradu.52QUJ	6.66667	59	0.51	4.05667	2.99173	2.12831e-17	1.80064e-16	Aradu.52QUJ	Protein kinase superfamily protein	-	GO:0035639//purine ribonucleoside triphosphate binding;GO:0032559//adenyl ribonucleotide binding;GO:0036094//small molecule binding;GO:0005524//ATP binding;GO:0032549//ribonucleoside binding;GO:1901363//heterocyclic compound binding;GO:0030554//adenyl nucleotide binding;GO:0003824//catalytic activity;GO:0001883//purine nucleoside binding;GO:0043167//ion binding;GO:1901265//nucleoside phosphate bi…	GO:0044260//cellular macromolecule metabolic process;GO:0016310//phosphorylation;GO:0006796//phosphate-containing compound metabolic process;GO:0043412//macromolecule modification;GO:0044267//cellular protein metabolic process;GO:0043170//macromolecule metabolic process;GO:0006468//protein phosphorylation;GO:0044237//cellular metabolic process;GO:0044238//primary metabolic process;GO:0019538//pro…	-	-	-	-
Aradu.52RDN	1.66667	99.4167	0.0533333	2.96667	5.79766	2.81675e-57	7.36975e-56	Aradu.52RDN	Membrane transporter D1 n	GO:0031224//intrinsic component of membrane;GO:0016020//membrane;GO:0016021//integral component of membrane;GO:0044425//membrane part	GO:0005215//transporter activity;GO:0022892//substrate-specific transporter activity;GO:0022891//substrate-specific transmembrane transporter activity;GO:0022857//transmembrane transporter activity	GO:0044699//single-organism process;GO:0009987//cellular process;GO:0044763//single-organism cellular process;GO:0051179//localization;GO:1902578//single-organism localization;GO:0044765//single-organism transport;GO:0051234//establishment of localization;GO:0055085//transmembrane transport;GO:0006810//transport	-	-	-	-
Aradu.52T97	0	26.93	0.001	3.86667	11.9169	6.39841e-18	5.55518e-17	Aradu.52T97	UDP-Glycosyltransferase superfamily protein	-	-	GO:0008152//metabolic process	-	-	-	-
Aradu.537VV	60.29	3333.05	2.75667	139.407	5.66023	0	0	Aradu.537VV	PREDICTED: chalcone synthase	-	GO:0003824//catalytic activity	GO:0008152//metabolic process;GO:0009058//biosynthetic process	Organismal Systems;Metabolism	Environmental adaptation;Biosynthesis of other secondary metabolites	ko04712//Circadian rhythm - plant;ko00941//Flavonoid biosynthesis	K00660
Aradu.539EP	13.3333	613.22	0.646667	26.9233	5.37969	3.22557e-203	4.56067e-201	Aradu.539EP	PATATIN-like protein 4	-	-	GO:0008152//metabolic process	-	-	-	-
Aradu.53P8J	3267.3	872.357	247.343	59.8033	-2.04822	4.36429e-96	2.14352e-94	Aradu.53P8J	transcription factor	-	GO:0005515//protein binding;GO:0046983//protein dimerization activity;GO:0005488//binding	-	-	-	-	-
Aradu.53Y6H	9.63667	2.11333	0.483333	0.0933333	-2.37255	0.000562473	0.00164259	Aradu.53Y6H	PREDICTED: RNA-binding protein 38-like isoform X3	-	GO:0097159//organic cyclic compound binding;GO:0005488//binding;GO:0036094//small molecule binding;GO:0003676//nucleic acid binding;GO:1901265//nucleoside phosphate binding;GO:1901363//heterocyclic compound binding;GO:0000166//nucleotide binding	-	-	-	-	-
Aradu.542S7	65.7333	538.06	2.32333	17.5567	2.91775	2.59341e-143	2.18029e-141	Aradu.542S7	Adenylyl-sulfate reductase n	-	GO:0003824//catalytic activity	GO:0065007//biological regulation;GO:0045454//cell redox homeostasis;GO:0019419//sulfate reduction;GO:0050789//regulation of biological process;GO:0050794//regulation of cellular process;GO:0055114//oxidation-reduction process;GO:0044763//single-organism cellular process;GO:0006790//sulfur compound metabolic process;GO:0019725//cellular homeostasis;GO:0065008//regulation of biological quality;GO:…	Metabolism	Energy metabolism	ko00920//Sulfur metabolism	K05907
Aradu.5474V	16.5733	97.67	0.956667	5.33	2.47805	1.80717e-17	1.53567e-16	Aradu.5474V	PREDICTED: glucan endo-1,3-beta-glucosidase-like	-	-	GO:0044238//primary metabolic process;GO:0071704//organic substance metabolic process;GO:0008152//metabolic process;GO:0005975//carbohydrate metabolic process	-	-	-	-
Aradu.54E1H	50.5933	237.883	1.95	8.50667	2.12512	1.10233e-35	1.76445e-34	Aradu.54E1H	bZIP transcription factor family protein	-	GO:0097159//organic cyclic compound binding;GO:0003676//nucleic acid binding;GO:0003700//sequence-specific DNA binding transcription factor activity;GO:1901363//heterocyclic compound binding;GO:0003677//DNA binding;GO:0005488//binding;GO:0043565//sequence-specific DNA binding;GO:0001071//nucleic acid binding transcription factor activity	-	-	-	-	-
Aradu.550AS	25.9233	5	1.09	0.203333	-2.42241	2.0336e-10	1.14069e-09	Aradu.550AS	PREDICTED: ARM REPEAT PROTEIN INTERACTING WITH ABF2-like isoform X1	-	GO:0005515//protein binding;GO:0005488//binding	GO:0015992//proton transport;GO:0015991//ATP hydrolysis coupled proton transport;GO:0006810//transport;GO:0006818//hydrogen transport;GO:0098655//cation transmembrane transport;GO:1902578//single-organism localization;GO:0044765//single-organism transport;GO:0034220//ion transmembrane transport;GO:0015988//energy coupled proton transmembrane transport, against electrochemical gradient;GO:0044699/…	-	-	-	-
Aradu.559EQ	10.44	1.75	0.186667	0.03	-2.63743	1.94412e-05	6.90957e-05	Aradu.559EQ	PREDICTED: uncharacterized protein LOC100813171 isoform X1	-	-	-	-	-	-	-
Aradu.55HMA	4.88333	24.0633	0.183333	0.84	2.19592	4.6085e-08	2.14475e-07	Aradu.55HMA	diacylglycerol kinase 5	-	GO:0016301//kinase activity;GO:0004143//diacylglycerol kinase activity;GO:0016773//phosphotransferase activity, alcohol group as acceptor;GO:0016740//transferase activity;GO:0016772//transferase activity, transferring phosphorus-containing groups;GO:0003824//catalytic activity;GO:0003951//NAD+ kinase activity	GO:0007165//signal transduction;GO:0044699//single-organism process;GO:0023052//signaling;GO:0007154//cell communication;GO:0044700//single organism signaling;GO:0007186//G-protein coupled receptor signaling pathway;GO:0050896//response to stimulus;GO:0009987//cellular process;GO:0007166//cell surface receptor signaling pathway;GO:0065007//biological regulation;GO:0051716//cellular response to st…	Environmental Information Processing;Metabolism	Lipid metabolism;Signal transduction	ko00564//Glycerophospholipid metabolism;ko00561//Glycerolipid metabolism;ko04070//Phosphatidylinositol signaling system	K00901
Aradu.55LZT	59.57	5.87	6.49667	0.57	-3.51067	5.199e-20	4.95906e-19	Aradu.55LZT	PLANT CADMIUM RESISTANCE 2	-	-	-	-	-	-	-
Aradu.55V7V	421.163	96.9367	6.57	1.4	-2.23047	4.46714e-89	1.99936e-87	Aradu.55V7V	LRR and NB-ARC domain disease resistance protein	-	GO:0032555//purine ribonucleotide binding;GO:0043531//ADP binding;GO:0097367//carbohydrate derivative binding;GO:1901363//heterocyclic compound binding;GO:0043168//anion binding;GO:0036094//small molecule binding;GO:0000166//nucleotide binding;GO:0001883//purine nucleoside binding;GO:0032553//ribonucleotide binding;GO:0017076//purine nucleotide binding;GO:0097159//organic cyclic compound binding;…	GO:0050896//response to stimulus;GO:0006950//response to stress;GO:0006952//defense response	-	-	-	-
Aradu.561J2	0	4.31333	0.001	0.116667	6.86625	0.000842659	0.00239256	Aradu.561J2	cyclic nucleotide-gated ion channel-like protein	GO:0016020//membrane	GO:0022857//transmembrane transporter activity;GO:0015267//channel activity;GO:0005215//transporter activity;GO:0022892//substrate-specific transporter activity;GO:0022803//passive transmembrane transporter activity;GO:0005216//ion channel activity;GO:0015075//ion transmembrane transporter activity;GO:0022891//substrate-specific transmembrane transporter activity;GO:0022838//substrate-specific ch…	GO:0044763//single-organism cellular process;GO:0055085//transmembrane transport;GO:0006810//transport;GO:0044699//single-organism process;GO:0051234//establishment of localization;GO:0006811//ion transport;GO:0009987//cellular process;GO:0051179//localization;GO:1902578//single-organism localization;GO:0044765//single-organism transport	Organismal Systems	Environmental adaptation	ko04626//Plant-pathogen interaction	K05391
Aradu.56C76	380.817	4153.77	27.3233	274.357	3.32785	0	0	Aradu.56C76	PREDICTED: chalcone synthase	-	GO:0003824//catalytic activity	GO:0008152//metabolic process;GO:0009058//biosynthetic process	Organismal Systems;Metabolism	Biosynthesis of other secondary metabolites;Environmental adaptation	ko04712//Circadian rhythm - plant;ko00941//Flavonoid biosynthesis	K00660
Aradu.56PKD	38.11	240.083	1.00667	5.71333	2.50475	2.86598e-44	5.73718e-43	Aradu.56PKD	receptor-like serine/threonine kinase 2	-	GO:0016772//transferase activity, transferring phosphorus-containing groups;GO:0003824//catalytic activity;GO:0001882//nucleoside binding;GO:0016773//phosphotransferase activity, alcohol group as acceptor;GO:0043167//ion binding;GO:0030554//adenyl nucleotide binding;GO:0005524//ATP binding;GO:0097367//carbohydrate derivative binding;GO:0032555//purine ribonucleotide binding;GO:0004672//protein ki…	GO:0044260//cellular macromolecule metabolic process;GO:0016310//phosphorylation;GO:0043170//macromolecule metabolic process;GO:0071704//organic substance metabolic process;GO:0048544//recognition of pollen;GO:0044763//single-organism cellular process;GO:0044703//multi-organism reproductive process;GO:0051704//multi-organism process;GO:0006468//protein phosphorylation;GO:0007154//cell communicati…	-	-	-	-
Aradu.56SP3	17.42	224.087	0.72	8.63667	3.58441	4.16225e-67	1.31443e-65	Aradu.56SP3	PREDICTED: uncharacterized protein LOC100781723 isoform X1	-	-	-	-	-	-	-
Aradu.56ZRQ	251.473	1407.79	11.84	60.7	2.35803	1.17583e-183	1.41278e-181	Aradu.56ZRQ	Heavy metal transport/detoxification superfamily protein	-	GO:0005488//binding;GO:0043169//cation binding;GO:0046872//metal ion binding;GO:0043167//ion binding	GO:0044699//single-organism process;GO:0044765//single-organism transport;GO:1902578//single-organism localization;GO:0006810//transport;GO:0006811//ion transport;GO:0051234//establishment of localization;GO:0051179//localization;GO:0006812//cation transport;GO:0030001//metal ion transport	-	-	-	-
Aradu.57C0B	28.6433	3.62	0.85	0.0966667	-3.13637	8.14242e-08	3.70321e-07	Aradu.57C0B	Protein phosphatase 2C family protein	-	GO:0003824//catalytic activity	-	-	-	-	-
Aradu.58746	133.657	33.7367	8.23333	1.85333	-2.15135	2.60951e-33	3.94569e-32	Aradu.58746	GRF zinc finger protein	-	GO:0008270//zinc ion binding;GO:0046914//transition metal ion binding;GO:0005488//binding;GO:0043167//ion binding;GO:0043169//cation binding;GO:0046872//metal ion binding	-	-	-	-	-
Aradu.598J8	17.01	4.71667	0.7	0.166667	-2.07039	3.41462e-05	0.000117777	Aradu.598J8	UDP-Glycosyltransferase superfamily protein	-	-	GO:0008152//metabolic process	-	-	-	-
Aradu.59AEA	116.117	21.6633	8.76	1.51667	-2.53003	1.30278e-37	2.19777e-36	Aradu.59AEA	myb transcription factor	-	GO:0044877//macromolecular complex binding;GO:0003676//nucleic acid binding;GO:1901363//heterocyclic compound binding;GO:0097159//organic cyclic compound binding;GO:0003682//chromatin binding;GO:0005488//binding;GO:0003677//DNA binding	-	-	-	-	-
Aradu.5FQ1Z	0	7.22667	0.001	0.546667	9.09452	3.72055e-06	1.43709e-05	Aradu.5FQ1Z	Uncharacterised protein family (UPF0497)	-	-	-	-	-	-	-
Aradu.5H16F	0	4.48	0.001	0.886667	9.79225	0.00132029	0.00363928	Aradu.5H16F	PREDICTED: uncharacterized protein LOC100780432	-	-	-	-	-	-	-
Aradu.5I6E9	113.31	23.39	5.46667	1.03667	-2.39871	6.38757e-33	9.55507e-32	Aradu.5I6E9	Remorin family protein	-	-	-	-	-	-	-
Aradu.5IY1Y	807.893	123.107	28.7433	4.02667	-2.83557	6.11977e-211	9.13739e-209	Aradu.5IY1Y	PREDICTED: L-ascorbate oxidase homolog	-	GO:0043167//ion binding;GO:0046872//metal ion binding;GO:0016491//oxidoreductase activity;GO:0005507//copper ion binding;GO:0003824//catalytic activity;GO:0043169//cation binding;GO:0005488//binding;GO:0046914//transition metal ion binding	GO:0055114//oxidation-reduction process;GO:0044699//single-organism process;GO:0044710//single-organism metabolic process;GO:0008152//metabolic process	-	-	-	-
Aradu.5K7BE	109.467	6.70667	3.89	0.216667	-4.16622	2.71518e-56	6.96406e-55	Aradu.5K7BE	purple acid phosphatase 17	-	GO:0003824//catalytic activity;GO:0016787//hydrolase activity;GO:0016791//phosphatase activity;GO:0003993//acid phosphatase activity;GO:0016788//hydrolase activity, acting on ester bonds;GO:0042578//phosphoric ester hydrolase activity	-	-	-	-	-
Aradu.5K9HV	299.733	65.8433	18.46	3.71	-2.31491	7.56956e-66	2.33385e-64	Aradu.5K9HV	sphingolipid delta desaturase	GO:0031224//intrinsic component of membrane;GO:0016021//integral component of membrane;GO:0016020//membrane;GO:0044425//membrane part	-	GO:0008610//lipid biosynthetic process;GO:0006631//fatty acid metabolic process;GO:0006082//organic acid metabolic process;GO:0055114//oxidation-reduction process;GO:0044711//single-organism biosynthetic process;GO:0044238//primary metabolic process;GO:0019752//carboxylic acid metabolic process;GO:0032787//monocarboxylic acid metabolic process;GO:0044237//cellular metabolic process;GO:0044763//si…	Metabolism	Lipid metabolism	ko00600//Sphingolipid metabolism	K04712
Aradu.5L8S5	10.95	169.723	0.59	8.29667	3.81374	4.60368e-63	1.35026e-61	Aradu.5L8S5	alpha/beta-Hydrolases superfamily protein	-	-	-	-	-	-	-
Aradu.5MH5E	34.9733	9.08667	4.19333	1.00667	-2.05851	2.85358e-12	1.81914e-11	Aradu.5MH5E	Dynein light chain type 1 family protein	GO:0043228//non-membrane-bounded organelle;GO:0032991//macromolecular complex;GO:0044422//organelle part;GO:0005623//cell;GO:0043229//intracellular organelle;GO:0043232//intracellular non-membrane-bounded organelle;GO:0044430//cytoskeletal part;GO:0044446//intracellular organelle part;GO:0005856//cytoskeleton;GO:0015630//microtubule cytoskeleton;GO:0005875//microtubule associated complex;GO:00432…	-	GO:0044763//single-organism cellular process;GO:0007017//microtubule-based process;GO:0009987//cellular process;GO:0044699//single-organism process	-	-	-	-
Aradu.5MH7X	113.333	7	2.44	0.14	-4.12338	2.66928e-52	6.30615e-51	Aradu.5MH7X	receptor-like serine/threonine kinase 2	-	GO:0032559//adenyl ribonucleotide binding;GO:0017076//purine nucleotide binding;GO:0032550//purine ribonucleoside binding;GO:0001882//nucleoside binding;GO:0005524//ATP binding;GO:1901265//nucleoside phosphate binding;GO:0003824//catalytic activity;GO:0016301//kinase activity;GO:0000166//nucleotide binding;GO:0043167//ion binding;GO:0032553//ribonucleotide binding;GO:0016773//phosphotransferase a…	GO:0032501//multicellular organismal process;GO:0044260//cellular macromolecule metabolic process;GO:0009987//cellular process;GO:0044237//cellular metabolic process;GO:0006468//protein phosphorylation;GO:0006793//phosphorus metabolic process;GO:0043412//macromolecule modification;GO:0044699//single-organism process;GO:0008152//metabolic process;GO:0051704//multi-organism process;GO:0044238//prim…	-	-	-	-
Aradu.5N8I2	165.583	1387.14	5.25333	40.2567	2.93792	6.35521e-249	1.27539e-246	Aradu.5N8I2	PREDICTED: remorin-like	-	-	-	-	-	-	-
Aradu.5P7M7	7.25	32.5833	0.143333	0.616667	2.10512	1.18096e-07	5.2979e-07	Aradu.5P7M7	family 31 glycosyl hydrolase, alpha-glucosidase	-	GO:0005488//binding;GO:0003824//catalytic activity;GO:0030246//carbohydrate binding	GO:0005975//carbohydrate metabolic process;GO:0071704//organic substance metabolic process;GO:0044238//primary metabolic process;GO:0008152//metabolic process	-	-	-	-
Aradu.5QH0B	161.233	41.64	13.6533	3.20333	-2.09161	1.04309e-45	2.1575e-44	Aradu.5QH0B	PREDICTED: probable 2-oxoglutarate/Fe(II)-dependent dioxygenase-like	-	GO:0003824//catalytic activity;GO:0016491//oxidoreductase activity	GO:0008152//metabolic process;GO:0044710//single-organism metabolic process;GO:0055114//oxidation-reduction process;GO:0044699//single-organism process	-	-	-	-
Aradu.5R9N2	5.12333	25.76	0.106667	0.52	2.2854	1.79562e-08	8.67087e-08	Aradu.5R9N2	cysteine-rich RLK (RECEPTOR-like protein kinase) 25	-	GO:0017076//purine nucleotide binding;GO:0016772//transferase activity, transferring phosphorus-containing groups;GO:0043167//ion binding;GO:0005488//binding;GO:0030554//adenyl nucleotide binding;GO:0097367//carbohydrate derivative binding;GO:0016773//phosphotransferase activity, alcohol group as acceptor;GO:0016301//kinase activity;GO:0097159//organic cyclic compound binding;GO:0016740//transfer…	GO:0044260//cellular macromolecule metabolic process;GO:0044267//cellular protein metabolic process;GO:0036211//protein modification process;GO:0006796//phosphate-containing compound metabolic process;GO:0016310//phosphorylation;GO:0006464//cellular protein modification process;GO:0008152//metabolic process;GO:0044237//cellular metabolic process;GO:0009987//cellular process;GO:0071704//organic su…	-	-	-	-
Aradu.5S0HA	22.9	208.703	0.943333	7.85333	3.05747	8.42387e-68	2.68294e-66	Aradu.5S0HA	Protein phosphatase 2C family protein	-	GO:0004722//protein serine/threonine phosphatase activity;GO:0016787//hydrolase activity;GO:0016788//hydrolase activity, acting on ester bonds;GO:0042578//phosphoric ester hydrolase activity;GO:0016791//phosphatase activity;GO:0004721//phosphoprotein phosphatase activity;GO:0003824//catalytic activity	GO:0071704//organic substance metabolic process;GO:0044237//cellular metabolic process;GO:0006796//phosphate-containing compound metabolic process;GO:0009987//cellular process;GO:0006793//phosphorus metabolic process;GO:0044260//cellular macromolecule metabolic process;GO:0006464//cellular protein modification process;GO:0044238//primary metabolic process;GO:0008152//metabolic process;GO:0044267/…	Environmental Information Processing	Signal transduction	ko04075//Plant hormone signal transduction	K14497
Aradu.5T6BE	112.967	542.667	6.29	27.7267	2.14014	1.49319e-98	7.60049e-97	Aradu.5T6BE	PREDICTED: 1-aminocyclopropane-1-carboxylate oxidase homolog 1	-	GO:0003824//catalytic activity;GO:0016491//oxidoreductase activity	GO:0044699//single-organism process;GO:0044710//single-organism metabolic process;GO:0008152//metabolic process;GO:0055114//oxidation-reduction process	-	-	-	-
Aradu.5X2IT	189.477	30.9433	5.53	0.84	-2.71882	4.20575e-69	1.35882e-67	Aradu.5X2IT	beta-D-xylosidase 4	-	-	GO:0005975//carbohydrate metabolic process;GO:0071704//organic substance metabolic process;GO:0044238//primary metabolic process;GO:0008152//metabolic process	-	-	-	-
Aradu.5XQ31	453.283	2686.71	8.29	45.2333	2.44794	7.08172e-243	1.35792e-240	Aradu.5XQ31	Protein kinase superfamily protein	-	GO:0000166//nucleotide binding;GO:0016301//kinase activity;GO:0035639//purine ribonucleoside triphosphate binding;GO:0016773//phosphotransferase activity, alcohol group as acceptor;GO:0032559//adenyl ribonucleotide binding;GO:0003824//catalytic activity;GO:0001883//purine nucleoside binding;GO:0043168//anion binding;GO:1901265//nucleoside phosphate binding;GO:0097159//organic cyclic compound bind…	GO:0019538//protein metabolic process;GO:0006793//phosphorus metabolic process;GO:0036211//protein modification process;GO:0043170//macromolecule metabolic process;GO:0008152//metabolic process;GO:0006468//protein phosphorylation;GO:0071704//organic substance metabolic process;GO:0044260//cellular macromolecule metabolic process;GO:0006464//cellular protein modification process;GO:0043412//macrom…	-	-	-	-
Aradu.5XU8S	10.32	2.33333	0.66	0.143333	-2.20309	0.000656223	0.00189561	Aradu.5XU8S	replication factor C subunit 3	-	-	-	Genetic Information Processing	Replication and repair	ko03420//Nucleotide excision repair;ko03030//DNA replication;ko03430//Mismatch repair	K10756
Aradu.5YU3Q	11.5733	382.837	0.336667	10.16	4.91544	1.31027e-166	1.34859e-164	Aradu.5YU3Q	beta glucosidase 12	-	-	GO:0008152//metabolic process;GO:0071704//organic substance metabolic process;GO:0044238//primary metabolic process;GO:0005975//carbohydrate metabolic process	Metabolism	Biosynthesis of other secondary metabolites;Metabolism of other amino acids;Carbohydrate metabolism	ko00500//Starch and sucrose metabolism;ko00940//Phenylpropanoid biosynthesis;ko00460//Cyanoamino acid metabolism	K01188
Aradu.5ZC0V	117.437	1043.99	6.49667	52.9767	3.02759	5.09881e-181	5.94766e-179	Aradu.5ZC0V	12-oxophytodienoate reductase 2	-	GO:0097159//organic cyclic compound binding;GO:1901265//nucleoside phosphate binding;GO:0010181//FMN binding;GO:0016491//oxidoreductase activity;GO:0050662//coenzyme binding;GO:0043167//ion binding;GO:0005488//binding;GO:0043168//anion binding;GO:0003824//catalytic activity;GO:0032553//ribonucleotide binding;GO:0036094//small molecule binding;GO:1901363//heterocyclic compound binding;GO:0097367//…	GO:0044699//single-organism process;GO:0044710//single-organism metabolic process;GO:0055114//oxidation-reduction process;GO:0008152//metabolic process	Metabolism	Lipid metabolism	ko00592//alpha-Linolenic acid metabolism	K05894
Aradu.5ZT49	7.32333	0	0.443333	0.001	-8.79225	6.33434e-07	2.64834e-06	Aradu.5ZT49	UDP-Glycosyltransferase superfamily protein	-	-	GO:0008152//metabolic process	-	-	-	-
Aradu.60DAC	42.93	1106.15	1.95	46.3533	4.57113	0	0	Aradu.60DAC	glutamate dehydrogenase 1	-	GO:0016491//oxidoreductase activity;GO:0003824//catalytic activity	GO:0044763//single-organism cellular process;GO:0043436//oxoacid metabolic process;GO:0044710//single-organism metabolic process;GO:0044237//cellular metabolic process;GO:0006520//cellular amino acid metabolic process;GO:0071704//organic substance metabolic process;GO:0006807//nitrogen compound metabolic process;GO:0019752//carboxylic acid metabolic process;GO:0044281//small molecule metabolic pr…	Metabolism	Energy metabolism;Amino acid metabolism;Global and Overview	ko01200//Carbon metabolism;ko00250//Alanine, aspartate and glutamate metabolism;ko00910//Nitrogen metabolism;ko00220//Arginine biosynthesis	K00261
Aradu.60FFJ	278.993	49.55	11.2767	1.82667	-2.62606	1.01863e-88	4.52295e-87	Aradu.60FFJ	PREDICTED: F-box only protein 13-like	-	GO:0005488//binding;GO:0005515//protein binding	-	-	-	-	-
Aradu.60GK5	151.52	5.33333	12.0633	0.393333	-4.93873	1.94812e-74	6.93434e-73	Aradu.60GK5	PREDICTED: RNA-binding protein 38-like	-	GO:0003676//nucleic acid binding;GO:1901363//heterocyclic compound binding;GO:0097159//organic cyclic compound binding;GO:0005488//binding;GO:0000166//nucleotide binding;GO:0036094//small molecule binding;GO:1901265//nucleoside phosphate binding	-	-	-	-	-
Aradu.629XK	27.2433	316.01	1.33667	14.4467	3.43403	7.58697e-88	3.32917e-86	Aradu.629XK	stress up-regulated Nod 19 protein	-	-	-	-	-	-	-
Aradu.62DXS	1762.67	331	220.17	38.05	-2.53265	2.63645e-155	2.5105e-153	Aradu.62DXS	myb transcription factor	-	GO:0044877//macromolecular complex binding;GO:1901363//heterocyclic compound binding;GO:0097159//organic cyclic compound binding;GO:0003677//DNA binding;GO:0003682//chromatin binding;GO:0003676//nucleic acid binding;GO:0005488//binding	-	-	-	-	-
Aradu.62IYE	18	3.66667	0.81	0.153333	-2.40125	4.11255e-08	1.92466e-07	Aradu.62IYE	FAD-binding Berberine family protein	-	GO:0016614//oxidoreductase activity, acting on CH-OH group of donors;GO:0016616//oxidoreductase activity, acting on the CH-OH group of donors, NAD or NADP as acceptor;GO:0003824//catalytic activity;GO:0005488//binding;GO:0016491//oxidoreductase activity;GO:0036094//small molecule binding;GO:0000166//nucleotide binding;GO:0048037//cofactor binding;GO:0043168//anion binding;GO:0097159//organic cycl…	GO:0055114//oxidation-reduction process;GO:0008152//metabolic process;GO:0044710//single-organism metabolic process;GO:0044699//single-organism process	-	-	-	-
Aradu.62W74	12	156.67	0.52	6.30333	3.59953	1.15017e-72	3.94361e-71	Aradu.62W74	1-aminocyclopropane-1-carboxylate synthase 4	-	GO:0030170//pyridoxal phosphate binding;GO:0043167//ion binding;GO:0048037//cofactor binding;GO:0003824//catalytic activity;GO:0005488//binding;GO:1901363//heterocyclic compound binding;GO:0097159//organic cyclic compound binding;GO:0043168//anion binding	GO:0009058//biosynthetic process;GO:0008152//metabolic process	Metabolism	Amino acid metabolism	ko00270//Cysteine and methionine metabolism	K01762
Aradu.634DQ	205.757	27.6133	13.8333	1.74	-2.99099	1.02345e-34	1.60066e-33	Aradu.634DQ	PREDICTED: flocculation protein FLO11-like isoform X2	-	-	-	-	-	-	-
Aradu.63SET	35.3333	572.873	1.21667	18.2167	3.90425	4.23487e-215	6.60487e-213	Aradu.63SET	PREDICTED: glucan endo-1,3-beta-glucosidase 11-like	-	-	GO:0071704//organic substance metabolic process;GO:0005975//carbohydrate metabolic process;GO:0044238//primary metabolic process;GO:0008152//metabolic process	-	-	-	-
Aradu.63WZG	5.02	0	0.196667	0.001	-7.61961	0.0011873	0.00329556	Aradu.63WZG	GTP binding Elongation factor Tu family protein	-	GO:0036094//small molecule binding;GO:1901363//heterocyclic compound binding;GO:0000166//nucleotide binding;GO:0043167//ion binding;GO:0032553//ribonucleotide binding;GO:0097159//organic cyclic compound binding;GO:0097367//carbohydrate derivative binding;GO:0017076//purine nucleotide binding;GO:0001882//nucleoside binding;GO:0032549//ribonucleoside binding;GO:0005525//GTP binding;GO:0001883//puri…	-	Genetic Information Processing	Translation	ko03015//mRNA surveillance pathway	K03267
Aradu.64LXI	203.52	4082.17	9.83667	180.863	4.20059	0	0	Aradu.64LXI	Folic acid and derivative biosynthetic process isoform 1 n	-	-	-	-	-	-	-
Aradu.65HV5	13.8533	61.12	0.726667	2.92333	2.00825	2.28116e-15	1.74463e-14	Aradu.65HV5	myo-inositol oxygenase 1	GO:0044464//cell part;GO:0044424//intracellular part;GO:0005622//intracellular;GO:0005623//cell;GO:0005737//cytoplasm	GO:0016491//oxidoreductase activity;GO:0016701//oxidoreductase activity, acting on single donors with incorporation of molecular oxygen;GO:0050113//inositol oxygenase activity;GO:0005488//binding;GO:0003824//catalytic activity;GO:0043169//cation binding;GO:0046914//transition metal ion binding;GO:0043167//ion binding;GO:0046872//metal ion binding;GO:0005506//iron ion binding	GO:0044275//cellular carbohydrate catabolic process;GO:0044723//single-organism carbohydrate metabolic process;GO:0016052//carbohydrate catabolic process;GO:0044712//single-organism catabolic process;GO:0019751//polyol metabolic process;GO:0044710//single-organism metabolic process;GO:0006020//inositol metabolic process;GO:0044763//single-organism cellular process;GO:1901616//organic hydroxy comp…	Metabolism	Carbohydrate metabolism	ko00562//Inositol phosphate metabolism;ko00053//Ascorbate and aldarate metabolism	K00469
Aradu.65PG4	302.1	60.9033	18.5233	3.45333	-2.42328	1.98735e-58	5.30127e-57	Aradu.65PG4	hypothetical protein	-	-	-	-	-	-	-
Aradu.65PX4	6.09667	29.7833	1.81333	8.08	2.15571	3.67469e-08	1.72594e-07	Aradu.65PX4	17.6 kDa class II heat shock protein	-	-	-	Genetic Information Processing	Folding, sorting and degradation	ko04141//Protein processing in endoplasmic reticulum	K13993
Aradu.65SUF	151.987	831.493	5.27	26.6167	2.33646	7.94335e-99	4.0506e-97	Aradu.65SUF	PREDICTED: MLO-like protein 12-like	GO:0016021//integral component of membrane;GO:0031224//intrinsic component of membrane;GO:0016020//membrane;GO:0044425//membrane part	-	GO:0050896//response to stimulus;GO:0006950//response to stress;GO:0006952//defense response	-	-	-	-
Aradu.65WG6	87.9	440.147	5.32	24.4967	2.20309	2.00083e-88	8.81419e-87	Aradu.65WG6	allene oxide cyclase 4	GO:0044424//intracellular part;GO:0043227//membrane-bounded organelle;GO:0043229//intracellular organelle;GO:0043226//organelle;GO:0005622//intracellular;GO:0044444//cytoplasmic part;GO:0005623//cell;GO:0005737//cytoplasm;GO:0009536//plastid;GO:0009507//chloroplast;GO:0043231//intracellular membrane-bounded organelle;GO:0044464//cell part	GO:0016853//isomerase activity;GO:0003824//catalytic activity	-	Metabolism	Lipid metabolism	ko00592//alpha-Linolenic acid metabolism	K10525
Aradu.66U2D	18.5867	121.273	0.473333	2.77667	2.55243	2.09399e-38	3.60975e-37	Aradu.66U2D	UDP-Glycosyltransferase superfamily protein	-	-	GO:0008152//metabolic process	-	-	-	-
Aradu.67IGJ	4.33333	26.26	0.206667	1.11333	2.42951	7.13951e-09	3.56791e-08	Aradu.67IGJ	PREDICTED: probable 2-oxoglutarate/Fe(II)-dependent dioxygenase-like	-	GO:0016491//oxidoreductase activity;GO:0003824//catalytic activity	GO:0044699//single-organism process;GO:0044710//single-organism metabolic process;GO:0008152//metabolic process;GO:0055114//oxidation-reduction process	-	-	-	-
Aradu.68AHZ	7.73667	0.993333	0.19	0.0233333	-3.02554	0.00010531	0.00034194	Aradu.68AHZ	subtilisin-like serine protease 2	-	GO:0016787//hydrolase activity;GO:0004175//endopeptidase activity;GO:0070011//peptidase activity, acting on L-amino acid peptides;GO:0008236//serine-type peptidase activity;GO:0017171//serine hydrolase activity;GO:0004252//serine-type endopeptidase activity;GO:0005515//protein binding;GO:0008233//peptidase activity;GO:0003824//catalytic activity;GO:0005488//binding;GO:0042802//identical protein b…	GO:0044092//negative regulation of molecular function;GO:0019222//regulation of metabolic process;GO:0048519//negative regulation of biological process;GO:0043086//negative regulation of catalytic activity;GO:0006508//proteolysis;GO:0044238//primary metabolic process;GO:0071704//organic substance metabolic process;GO:0065009//regulation of molecular function;GO:0065007//biological regulation;GO:0…	-	-	-	-
Aradu.68QSX	0	9.33667	0.001	0.28	8.12928	1.04219e-06	4.25815e-06	Aradu.68QSX	GDSL-like Lipase/Acylhydrolase superfamily protein	-	GO:0016787//hydrolase activity;GO:0003824//catalytic activity	GO:0044699//single-organism process;GO:0008152//metabolic process;GO:0006629//lipid metabolic process;GO:0044710//single-organism metabolic process;GO:0071704//organic substance metabolic process;GO:0044238//primary metabolic process	-	-	-	-
Aradu.69JL5	974.777	241.52	34.8367	7.88333	-2.14373	1.22955e-91	5.65683e-90	Aradu.69JL5	HXXXD-type acyl-transferase family protein	-	-	-	-	-	-	-
Aradu.6AL72	7573.65	1585.86	304.417	58.5867	-2.3774	9.3047e-162	9.2701e-160	Aradu.6AL72	Cytochrome P450 superfamily protein	-	GO:0020037//heme binding;GO:0005506//iron ion binding;GO:0046914//transition metal ion binding;GO:0043167//ion binding;GO:0043169//cation binding;GO:0046872//metal ion binding;GO:0097159//organic cyclic compound binding;GO:0005488//binding;GO:1901363//heterocyclic compound binding;GO:0046906//tetrapyrrole binding	GO:0055114//oxidation-reduction process;GO:0044710//single-organism metabolic process;GO:0008152//metabolic process;GO:0044699//single-organism process	Metabolism	Biosynthesis of other secondary metabolites;Metabolism of terpenoids and polyketides	ko00945//Stilbenoid, diarylheptanoid and gingerol biosynthesis;ko00903//Limonene and pinene degradation	K00517
Aradu.6C2IC	7.28333	1.42	0.06	0.0133333	-2.16993	0.000485795	0.00143144	Aradu.6C2IC	PREDICTED: RNA-directed DNA polymerase homolog	-	GO:0003676//nucleic acid binding;GO:0016772//transferase activity, transferring phosphorus-containing groups;GO:0016779//nucleotidyltransferase activity;GO:0043169//cation binding;GO:0005488//binding;GO:0043167//ion binding;GO:0003824//catalytic activity;GO:0016740//transferase activity;GO:0046914//transition metal ion binding;GO:0046872//metal ion binding;GO:0003964//RNA-directed DNA polymerase …	GO:0009058//biosynthetic process;GO:0006260//DNA replication;GO:0006259//DNA metabolic process;GO:0043170//macromolecule metabolic process;GO:0090304//nucleic acid metabolic process;GO:0006278//RNA-dependent DNA replication;GO:0009987//cellular process;GO:0071704//organic substance metabolic process;GO:0044237//cellular metabolic process;GO:0034641//cellular nitrogen compound metabolic process;GO…	-	-	-	-
Aradu.6DM63	0	12.8833	0.001	3.51667	11.78	4.63586e-08	2.15659e-07	Aradu.6DM63	peroxisomal 3-ketoacyl-CoA thiolase 3	-	GO:0003824//catalytic activity	GO:0008152//metabolic process	Cellular Processes;Metabolism	Lipid metabolism;Transport and catabolism;Amino acid metabolism;Global and Overview	ko04146//Peroxisome;ko01212//Fatty acid metabolism;ko00071//Fatty acid degradation;ko00280//Valine, leucine and isoleucine degradation;ko00592//alpha-Linolenic acid metabolism;ko01040//Biosynthesis of unsaturated fatty acids	K07513
Aradu.6EJ01	23.6667	328.417	1.78667	23.16	3.69629	3.70916e-115	2.2948e-113	Aradu.6EJ01	PREDICTED: probable mitochondrial pyruvate carrier 2-like isoform X1	GO:0005623//cell;GO:0031966//mitochondrial membrane;GO:0044422//organelle part;GO:0044464//cell part;GO:0044444//cytoplasmic part;GO:0044429//mitochondrial part;GO:0043226//organelle;GO:0005737//cytoplasm;GO:0005743//mitochondrial inner membrane;GO:0005622//intracellular;GO:0043227//membrane-bounded organelle;GO:0043229//intracellular organelle;GO:0031090//organelle membrane;GO:0031975//envelope;…	-	GO:0006820//anion transport;GO:0044765//single-organism transport;GO:0015718//monocarboxylic acid transport;GO:1902578//single-organism localization;GO:0051234//establishment of localization;GO:0006811//ion transport;GO:0006848//pyruvate transport;GO:0006839//mitochondrial transport;GO:0015711//organic anion transport;GO:0015849//organic acid transport;GO:0071702//organic substance transport;GO:0…	-	-	-	-
Aradu.6EL9J	6	0.666667	0.19	0.02	-3.24793	0.000644546	0.00186486	Aradu.6EL9J	PREDICTED: putative ubiquitin-like-specific protease 1B-like isoform X3	-	GO:0008234//cysteine-type peptidase activity;GO:0003824//catalytic activity;GO:0070011//peptidase activity, acting on L-amino acid peptides;GO:0008233//peptidase activity;GO:0016787//hydrolase activity	GO:0071704//organic substance metabolic process;GO:0008152//metabolic process;GO:0043170//macromolecule metabolic process;GO:0006508//proteolysis;GO:0019538//protein metabolic process;GO:0044238//primary metabolic process	-	-	-	-
Aradu.6G9IX	3.68333	0	0.296667	0.001	-8.2127	0.00121927	0.00337709	Aradu.6G9IX	Unknown protein	-	-	-	-	-	-	-
Aradu.6I8N8	63.14	900.7	2.26667	29.4767	3.70093	8.69561e-240	1.62292e-237	Aradu.6I8N8	CRT (chloroquine-resistance transporter)-like transporter 3	-	-	-	-	-	-	-
Aradu.6LP5E	139.333	1168.67	8.86	67.95	2.93909	5.09086e-240	9.5332e-238	Aradu.6LP5E	PREDICTED: uncharacterized protein LOC100803045	-	-	-	-	-	-	-
Aradu.6M14N	3	25.6967	0.113333	0.906667	3	7.9272e-12	4.90878e-11	Aradu.6M14N	UDP-Glycosyltransferase superfamily protein	-	-	GO:0008152//metabolic process	-	-	-	-
Aradu.6P2I9	4.33333	19.3	0.346667	1.43667	2.0511	0.000177019	0.000555918	Aradu.6P2I9	PREDICTED: uncharacterized protein LOC100804224 isoform X1	-	-	-	-	-	-	-
Aradu.6Q428	996.51	8152.04	20.3	153.443	2.91815	1.38319e-302	3.89178e-300	Aradu.6Q428	Nitrite/sulfite reductase ferredoxin domain / nitrite/sulfite reductase, 4Fe-4S iron-sulfur cluster-binding domain multi-domain protein n	-	GO:1901363//heterocyclic compound binding;GO:0020037//heme binding;GO:0046906//tetrapyrrole binding;GO:0051536//iron-sulfur cluster binding;GO:0051540//metal cluster binding;GO:0050311//sulfite reductase (ferredoxin) activity;GO:0016673//oxidoreductase activity, acting on a sulfur group of donors, iron-sulfur protein as acceptor;GO:0016491//oxidoreductase activity;GO:0005488//binding;GO:0016667//…	GO:0044699//single-organism process;GO:0008152//metabolic process;GO:0055114//oxidation-reduction process;GO:0044710//single-organism metabolic process	Metabolism	Energy metabolism	ko00920//Sulfur metabolism	K00392
Aradu.6Q7IR	730.797	176.163	25.5367	5.74	-2.15345	6.27862e-34	9.64462e-33	Aradu.6Q7IR	hypothetical protein	-	-	-	-	-	-	-
Aradu.6QC34	58.2367	304.963	0.993333	4.77333	2.26465	5.92668e-59	1.59616e-57	Aradu.6QC34	receptor-like protein kinase 2	-	GO:0005488//binding;GO:0005515//protein binding	-	-	-	-	-
Aradu.6S06R	160.217	36.78	19.2967	4.02667	-2.26069	1.95332e-27	2.46547e-26	Aradu.6S06R	DNA-binding protein n	GO:0043227//membrane-bounded organelle;GO:0044424//intracellular part;GO:0005634//nucleus;GO:0043226//organelle;GO:0005623//cell;GO:0043231//intracellular membrane-bounded organelle;GO:0043229//intracellular organelle;GO:0044464//cell part;GO:0005622//intracellular	GO:0097159//organic cyclic compound binding;GO:0001067//regulatory region nucleic acid binding;GO:0001071//nucleic acid binding transcription factor activity;GO:0005488//binding;GO:0000975//regulatory region DNA binding;GO:0003700//sequence-specific DNA binding transcription factor activity;GO:0003676//nucleic acid binding;GO:0000976//transcription regulatory region sequence-specific DNA binding;…	-	-	-	-	-
Aradu.6T298	80.03	985.73	1.1	12.37	3.49127	6.36448e-272	1.54266e-269	Aradu.6T298	ATP-binding ABC transporter	GO:0016021//integral component of membrane;GO:0031224//intrinsic component of membrane;GO:0044425//membrane part;GO:0016020//membrane	GO:0016887//ATPase activity;GO:0016787//hydrolase activity;GO:0036094//small molecule binding;GO:0001882//nucleoside binding;GO:0017076//purine nucleotide binding;GO:0032549//ribonucleoside binding;GO:0032555//purine ribonucleotide binding;GO:0032559//adenyl ribonucleotide binding;GO:0000166//nucleotide binding;GO:1901363//heterocyclic compound binding;GO:0017111//nucleoside-triphosphatase activi…	GO:0044699//single-organism process;GO:0006810//transport;GO:0044763//single-organism cellular process;GO:0051234//establishment of localization;GO:0044765//single-organism transport;GO:0051179//localization;GO:0009987//cellular process;GO:1902578//single-organism localization;GO:0055085//transmembrane transport	-	-	-	-
Aradu.6T4IB	11.3333	153.303	0.686667	8.43	3.61785	2.5276e-58	6.72956e-57	Aradu.6T4IB	Pyridoxal phosphate (PLP)-dependent transferases superfamily protein n	-	GO:0043168//anion binding;GO:0003824//catalytic activity;GO:0043167//ion binding;GO:0030170//pyridoxal phosphate binding;GO:0048037//cofactor binding;GO:0097159//organic cyclic compound binding;GO:0005488//binding;GO:0016831//carboxy-lyase activity;GO:1901363//heterocyclic compound binding;GO:0016830//carbon-carbon lyase activity;GO:0016829//lyase activity	GO:0044281//small molecule metabolic process;GO:0044699//single-organism process;GO:0043436//oxoacid metabolic process;GO:0006082//organic acid metabolic process;GO:0044237//cellular metabolic process;GO:0044710//single-organism metabolic process;GO:0071704//organic substance metabolic process;GO:0044763//single-organism cellular process;GO:0019752//carboxylic acid metabolic process;GO:0009987//c…	Metabolism	Amino acid metabolism	ko00340//Histidine metabolism	K01590
Aradu.6T9HL	41.9367	190.863	1.70333	7.01333	2.04174	6.17314e-30	8.44467e-29	Aradu.6T9HL	F-box family protein	-	GO:0005488//binding;GO:0005515//protein binding	-	-	-	-	-
Aradu.6YH3X	4.33333	0.333333	0.436667	0.0266667	-4.03342	0.00251631	0.00660931	Aradu.6YH3X	LEAFY-like protein n	-	GO:0005488//binding;GO:0003677//DNA binding;GO:0097159//organic cyclic compound binding;GO:0003676//nucleic acid binding;GO:1901363//heterocyclic compound binding	-	-	-	-	-
Aradu.6Z465	177.25	1859.47	8.53333	82.12	3.26655	1.38422e-268	3.28406e-266	Aradu.6Z465	peroxisomal 3-ketoacyl-CoA thiolase 3	-	GO:0003824//catalytic activity	GO:0008152//metabolic process	Cellular Processes;Metabolism	Transport and catabolism;Lipid metabolism;Global and Overview;Amino acid metabolism	ko04146//Peroxisome;ko01212//Fatty acid metabolism;ko00071//Fatty acid degradation;ko00280//Valine, leucine and isoleucine degradation;ko00592//alpha-Linolenic acid metabolism;ko01040//Biosynthesis of unsaturated fatty acids	K07513
Aradu.70DQ7	23	5	5.45	1.11667	-2.28706	9.84638e-09	4.86592e-08	Aradu.70DQ7	CAP (Cysteine-rich secretory proteins, Antigen 5, and Pathogenesis-related 1 protein) superfamily protein	-	-	-	Organismal Systems;Environmental Information Processing	Signal transduction;Environmental adaptation	ko04075//Plant hormone signal transduction;ko04626//Plant-pathogen interaction	K13449
Aradu.70TX2	1.30667	9.55333	0.11	0.78	2.82597	0.000215002	0.000667749	Aradu.70TX2	Nucleic acid-binding, OB-fold-like protein	-	-	-	Genetic Information Processing	Replication and repair	ko03420//Nucleotide excision repair;ko03030//DNA replication;ko03440//Homologous recombination;ko03430//Mismatch repair	K07466
Aradu.70WHV	634.36	113.567	22.8567	3.75667	-2.60509	1.43485e-85	6.06789e-84	Aradu.70WHV	PREDICTED: probable polygalacturonase-like	-	GO:0003824//catalytic activity;GO:0016787//hydrolase activity;GO:0016798//hydrolase activity, acting on glycosyl bonds;GO:0004650//polygalacturonase activity;GO:0004553//hydrolase activity, hydrolyzing O-glycosyl compounds	GO:0008152//metabolic process;GO:0044238//primary metabolic process;GO:0005975//carbohydrate metabolic process;GO:0071704//organic substance metabolic process	-	-	-	-
Aradu.70ZJ1	20.94	3	0.91	0.123333	-2.8833	9.87995e-09	4.88165e-08	Aradu.70ZJ1	Peroxidase family protein	-	GO:1901363//heterocyclic compound binding;GO:0016491//oxidoreductase activity;GO:0097159//organic cyclic compound binding;GO:0016209//antioxidant activity;GO:0046906//tetrapyrrole binding;GO:0020037//heme binding;GO:0004601//peroxidase activity;GO:0016684//oxidoreductase activity, acting on peroxide as acceptor;GO:0005488//binding;GO:0003824//catalytic activity	GO:0050896//response to stimulus;GO:0006950//response to stress;GO:0008152//metabolic process;GO:0044699//single-organism process;GO:0055114//oxidation-reduction process;GO:0044710//single-organism metabolic process;GO:0006979//response to oxidative stress	Metabolism	Biosynthesis of other secondary metabolites	ko00940//Phenylpropanoid biosynthesis	K00430
Aradu.71H9Q	29.6367	5.37	2.70333	0.456667	-2.56553	2.69775e-09	1.3914e-08	Aradu.71H9Q	Protein of unknown function (DUF1191)	-	-	-	-	-	-	-
Aradu.7244H	13.2667	64.6567	1.32	5.95	2.17235	1.20616e-18	1.08575e-17	Aradu.7244H	LOB domain-containing protein 4	-	-	-	-	-	-	-
Aradu.72595	435.5	113.553	8.92333	2.15	-2.05325	1.61634e-64	4.89986e-63	Aradu.72595	Xyloglucan endotransglucosylase/hydrolase family protein	GO:0071944//cell periphery;GO:0048046//apoplast;GO:0005623//cell;GO:0030312//external encapsulating structure;GO:0005618//cell wall;GO:0005576//extracellular region;GO:0044464//cell part	GO:0016758//transferase activity, transferring hexosyl groups;GO:0016757//transferase activity, transferring glycosyl groups;GO:0016740//transferase activity;GO:0003824//catalytic activity;GO:0016762//xyloglucan:xyloglucosyl transferase activity	GO:0006073//cellular glucan metabolic process;GO:0044042//glucan metabolic process;GO:0044264//cellular polysaccharide metabolic process;GO:0005975//carbohydrate metabolic process;GO:0005976//polysaccharide metabolic process;GO:0009987//cellular process;GO:0044237//cellular metabolic process;GO:0008152//metabolic process;GO:0043170//macromolecule metabolic process;GO:0071704//organic substance me…	-	-	-	-
Aradu.72KEV	76.9533	3031.6	3.69333	132.7	5.1671	0	0	Aradu.72KEV	PREDICTED: chalcone synthase	-	GO:0003824//catalytic activity	GO:0008152//metabolic process;GO:0009058//biosynthetic process	Organismal Systems;Metabolism	Environmental adaptation;Biosynthesis of other secondary metabolites	ko04712//Circadian rhythm - plant;ko00941//Flavonoid biosynthesis	K00660
Aradu.72V59	163.94	7176.69	8.2	327.853	5.32128	0	0	Aradu.72V59	PREDICTED: chalcone synthase	-	GO:0003824//catalytic activity	GO:0009058//biosynthetic process;GO:0008152//metabolic process	Metabolism;Organismal Systems	Environmental adaptation;Biosynthesis of other secondary metabolites	ko04712//Circadian rhythm - plant;ko00941//Flavonoid biosynthesis	K00660
Aradu.73MTJ	358.977	4036.46	13.1933	138.443	3.39141	7.52769e-151	6.80909e-149	Aradu.73MTJ	Cytochrome P450 superfamily protein	-	GO:0005488//binding;GO:0005506//iron ion binding;GO:0097159//organic cyclic compound binding;GO:0043167//ion binding;GO:0046906//tetrapyrrole binding;GO:0020037//heme binding;GO:0046914//transition metal ion binding;GO:0046872//metal ion binding;GO:1901363//heterocyclic compound binding;GO:0043169//cation binding	GO:0055114//oxidation-reduction process;GO:0044699//single-organism process;GO:0008152//metabolic process;GO:0044710//single-organism metabolic process	Metabolism	Biosynthesis of other secondary metabolites;Metabolism of cofactors and vitamins;Amino acid metabolism;Global and Overview	ko00940//Phenylpropanoid biosynthesis;ko00130//Ubiquinone and other terpenoid-quinone biosynthesis;ko00360//Phenylalanine metabolism;ko00941//Flavonoid biosynthesis;ko00945//Stilbenoid, diarylheptanoid and gingerol biosynthesis;ko01220//Degradation of aromatic compounds	K00487
Aradu.73PA3	121.277	946.707	8.38	60.0267	2.84058	4.35351e-175	4.79838e-173	Aradu.73PA3	Glutathione S-transferase family protein	-	GO:0005488//binding;GO:0005515//protein binding	-	Metabolism	Metabolism of other amino acids	ko00480//Glutathione metabolism	K00799
Aradu.748MX	19.27	5.27667	1.25	0.31	-2.01159	8.5042e-07	3.50891e-06	Aradu.748MX	inorganic carbon transport protein-related	-	-	GO:0055114//oxidation-reduction process;GO:0008152//metabolic process;GO:0044699//single-organism process;GO:0044710//single-organism metabolic process	-	-	-	-
Aradu.74ERY	811.54	208.563	15.5267	3.67	-2.0809	6.96678e-74	2.44562e-72	Aradu.74ERY	PREDICTED: L-ascorbate oxidase homolog	-	GO:0005507//copper ion binding;GO:0003824//catalytic activity;GO:0043167//ion binding;GO:0005488//binding;GO:0016491//oxidoreductase activity;GO:0046914//transition metal ion binding;GO:0043169//cation binding;GO:0046872//metal ion binding	GO:0055114//oxidation-reduction process;GO:0008152//metabolic process;GO:0044699//single-organism process;GO:0044710//single-organism metabolic process	-	-	-	-
Aradu.750CN	20.1167	4.29	1.56	0.293333	-2.41093	8.20113e-08	3.729e-07	Aradu.750CN	xyloglucan endotransglucosylase/hydrolase 6	GO:0048046//apoplast;GO:0030312//external encapsulating structure;GO:0005623//cell;GO:0044464//cell part;GO:0005618//cell wall;GO:0071944//cell periphery;GO:0005576//extracellular region	GO:0016758//transferase activity, transferring hexosyl groups;GO:0016740//transferase activity;GO:0016757//transferase activity, transferring glycosyl groups;GO:0003824//catalytic activity;GO:0016762//xyloglucan:xyloglucosyl transferase activity	GO:0044262//cellular carbohydrate metabolic process;GO:0008152//metabolic process;GO:0005976//polysaccharide metabolic process;GO:0044264//cellular polysaccharide metabolic process;GO:0005975//carbohydrate metabolic process;GO:0044238//primary metabolic process;GO:0044237//cellular metabolic process;GO:0009987//cellular process;GO:0043170//macromolecule metabolic process;GO:0071704//organic subst…	-	-	-	-
Aradu.752ZV	2.66667	220.28	0.283333	21.1267	6.22042	9.36345e-113	5.64337e-111	Aradu.752ZV	basic helix-loop-helix (bHLH) DNA-binding superfamily protein	-	GO:0005515//protein binding;GO:0003676//nucleic acid binding;GO:1901363//heterocyclic compound binding;GO:0003677//DNA binding;GO:0005488//binding;GO:0097159//organic cyclic compound binding;GO:0046983//protein dimerization activity	-	-	-	-	-
Aradu.755IM	1.45333	58.0967	0.06	2.15333	5.16547	1.2506e-31	1.80424e-30	Aradu.755IM	Amidase family protein	-	-	-	Metabolism	Amino acid metabolism	ko00330//Arginine and proline metabolism;ko00360//Phenylalanine metabolism;ko00380//Tryptophan metabolism	K01426
Aradu.75AYZ	18.7267	1409.52	1.7	116.95	6.10421	0	0	Aradu.75AYZ	PREDICTED: coatomer subunit beta'-2-like	-	GO:0005488//binding;GO:0005515//protein binding	-	-	-	-	-
Aradu.77FZL	399.467	107.993	25.5767	6.31333	-2.01835	3.97272e-77	1.46823e-75	Aradu.77FZL	nudix hydrolase homolog 13	-	GO:0003824//catalytic activity;GO:0016787//hydrolase activity	-	-	-	-	-
Aradu.78I1X	19.8733	162.767	0.606667	4.56667	2.91217	2.86433e-59	7.75516e-58	Aradu.78I1X	subtilisin-like serine protease 2	-	GO:0005488//binding;GO:0003824//catalytic activity;GO:0004175//endopeptidase activity;GO:0005515//protein binding;GO:0008233//peptidase activity;GO:0042802//identical protein binding;GO:0008236//serine-type peptidase activity;GO:0070011//peptidase activity, acting on L-amino acid peptides;GO:0017171//serine hydrolase activity;GO:0016787//hydrolase activity;GO:0004252//serine-type endopeptidase ac…	GO:0071704//organic substance metabolic process;GO:0048519//negative regulation of biological process;GO:0050790//regulation of catalytic activity;GO:0043086//negative regulation of catalytic activity;GO:0065009//regulation of molecular function;GO:0044238//primary metabolic process;GO:0043170//macromolecule metabolic process;GO:0008152//metabolic process;GO:0050789//regulation of biological proc…	-	-	-	-
Aradu.790V9	9.04667	40.7533	0.286667	1.17333	2.03317	1.34098e-09	7.08197e-09	Aradu.790V9	nitrate transporter 1.7	GO:0016020//membrane	GO:0005215//transporter activity	GO:0051234//establishment of localization;GO:0051179//localization;GO:0006810//transport	-	-	-	-
Aradu.7AC9I	39.3333	2.33333	3.44333	0.17	-4.3402	3.02493e-22	3.16282e-21	Aradu.7AC9I	WRKY family transcription factor	-	GO:0003677//DNA binding;GO:0003700//sequence-specific DNA binding transcription factor activity;GO:0097159//organic cyclic compound binding;GO:0001071//nucleic acid binding transcription factor activity;GO:1901363//heterocyclic compound binding;GO:0005488//binding;GO:0003676//nucleic acid binding;GO:0043565//sequence-specific DNA binding	-	-	-	-	-
Aradu.7C3YV	94.1767	15.1567	3.27667	0.49	-2.74138	3.21721e-23	3.49437e-22	Aradu.7C3YV	PREDICTED: BTB/POZ domain-containing protein	-	-	-	-	-	-	-
Aradu.7C6M7	891.12	212.333	42.21	9.24333	-2.1911	1.0898e-144	9.27338e-143	Aradu.7C6M7	PREDICTED: probable polygalacturonase-like	-	GO:0004650//polygalacturonase activity;GO:0003824//catalytic activity;GO:0016787//hydrolase activity;GO:0016798//hydrolase activity, acting on glycosyl bonds;GO:0004553//hydrolase activity, hydrolyzing O-glycosyl compounds	GO:0044238//primary metabolic process;GO:0005975//carbohydrate metabolic process;GO:0071704//organic substance metabolic process;GO:0008152//metabolic process	-	-	-	-
Aradu.7DQ9K	15.2533	461.707	0.68	18.94	4.79976	2.07392e-157	2.00554e-155	Aradu.7DQ9K	UDP-Glycosyltransferase superfamily protein	-	-	GO:0008152//metabolic process	-	-	-	-
Aradu.7GN6Y	45.0267	321.34	3.1	20.3033	2.71138	1.18789e-73	4.14398e-72	Aradu.7GN6Y	trehalose-6-phosphate phosphatase	-	GO:0003824//catalytic activity	GO:0005984//disaccharide metabolic process;GO:0009312//oligosaccharide biosynthetic process;GO:0009311//oligosaccharide metabolic process;GO:0044723//single-organism carbohydrate metabolic process;GO:0008152//metabolic process;GO:0016051//carbohydrate biosynthetic process;GO:0071704//organic substance metabolic process;GO:0044249//cellular biosynthetic process;GO:0044699//single-organism process;…	Metabolism	Carbohydrate metabolism	ko00500//Starch and sucrose metabolism	K01087
Aradu.7HS2D	33.63	7.04667	1.58667	0.28	-2.5025	1.84504e-08	8.89721e-08	Aradu.7HS2D	nodulin MtN21 /EamA-like transporter family protein	GO:0016020//membrane	-	-	-	-	-	-
Aradu.7K7AA	0	3.33	0.001	0.183333	7.51833	0.00243303	0.0064068	Aradu.7K7AA	Unknown protein	-	-	-	-	-	-	-
Aradu.7K9KV	582.663	5011.01	39.4633	310.97	2.97819	0	0	Aradu.7K9KV	ferredoxin 3	-	GO:0005488//binding;GO:0051536//iron-sulfur cluster binding;GO:0009055//electron carrier activity;GO:0051540//metal cluster binding	GO:0009987//cellular process;GO:0006091//generation of precursor metabolites and energy;GO:0044237//cellular metabolic process;GO:0044763//single-organism cellular process;GO:0022900//electron transport chain;GO:0044699//single-organism process;GO:0008152//metabolic process;GO:0055114//oxidation-reduction process;GO:0044710//single-organism metabolic process	Metabolism	Energy metabolism	ko00195//Photosynthesis	K02639
Aradu.7LU89	54.9933	13.04	2.05333	0.453333	-2.17932	2.86723e-18	2.52817e-17	Aradu.7LU89	Oxysterol-binding family protein	-	-	-	-	-	-	-
Aradu.7N2H0	404.243	58.5467	12.37	1.63667	-2.91801	1.00526e-120	6.54482e-119	Aradu.7N2H0	beta-fructofuranosidase 5	-	GO:0016787//hydrolase activity;GO:0003824//catalytic activity;GO:0016798//hydrolase activity, acting on glycosyl bonds;GO:0015926//glucosidase activity;GO:0004564//beta-fructofuranosidase activity;GO:0004575//sucrose alpha-glucosidase activity;GO:0004553//hydrolase activity, hydrolyzing O-glycosyl compounds;GO:0090599//alpha-glucosidase activity	GO:0071704//organic substance metabolic process;GO:0044238//primary metabolic process;GO:0005975//carbohydrate metabolic process;GO:0008152//metabolic process	Metabolism	Carbohydrate metabolism	ko00500//Starch and sucrose metabolism;ko00052//Galactose metabolism	K01193
Aradu.7N61X	8.34333	0.64	0.206667	0.0166667	-3.63227	1.73652e-05	6.21354e-05	Aradu.7N61X	alpha-glucosidase	-	GO:0005488//binding;GO:0030246//carbohydrate binding;GO:0003824//catalytic activity	GO:0005975//carbohydrate metabolic process;GO:0071704//organic substance metabolic process;GO:0044238//primary metabolic process;GO:0008152//metabolic process	-	-	-	-
Aradu.7N93N	1	21.6667	0.0733333	1.44667	4.30212	2.08368e-12	1.3407e-11	Aradu.7N93N	GRAM domain-containing protein / ABA-responsive protein-related	-	-	-	-	-	-	-
Aradu.7SA2L	0	4	0.001	0.35	8.45121	0.00102391	0.00287035	Aradu.7SA2L	Lactoylglutathione lyase / glyoxalase I family protein	-	-	-	-	-	-	-
Aradu.7SN56	141.323	2419.55	6.94	109.483	3.97963	0	0	Aradu.7SN56	PREDICTED: gibberellin 20 oxidase 2-like	-	GO:0043169//cation binding;GO:0043167//ion binding;GO:0046872//metal ion binding;GO:0016491//oxidoreductase activity;GO:0003824//catalytic activity;GO:0046914//transition metal ion binding;GO:0005506//iron ion binding;GO:0005488//binding	GO:0044699//single-organism process;GO:0044710//single-organism metabolic process;GO:0008152//metabolic process;GO:0055114//oxidation-reduction process	Metabolism	Metabolism of terpenoids and polyketides	ko00904//Diterpenoid biosynthesis	K04125
Aradu.7V6T8	7.59333	48.4667	0.533333	3.04333	2.51254	9.30301e-15	6.88819e-14	Aradu.7V6T8	zinc finger protein CONSTANS-LIKE 5-like	GO:0005623//cell;GO:0044464//cell part;GO:0005622//intracellular	GO:0046872//metal ion binding;GO:0046914//transition metal ion binding;GO:0005488//binding;GO:0043167//ion binding;GO:0008270//zinc ion binding;GO:0043169//cation binding	-	-	-	-	-
Aradu.7V7LG	24.8833	140.767	0.436667	2.23333	2.35459	7.28141e-37	1.20122e-35	Aradu.7V7LG	receptor kinase 3	-	GO:0005488//binding;GO:0030554//adenyl nucleotide binding;GO:0004672//protein kinase activity;GO:0032550//purine ribonucleoside binding;GO:0016773//phosphotransferase activity, alcohol group as acceptor;GO:0043167//ion binding;GO:0036094//small molecule binding;GO:0003824//catalytic activity;GO:0001882//nucleoside binding;GO:0032555//purine ribonucleotide binding;GO:0032549//ribonucleoside bindin…	GO:0008152//metabolic process;GO:0006793//phosphorus metabolic process;GO:0016310//phosphorylation;GO:0044260//cellular macromolecule metabolic process;GO:0036211//protein modification process;GO:0044267//cellular protein metabolic process;GO:0043412//macromolecule modification;GO:0019538//protein metabolic process;GO:0044238//primary metabolic process;GO:0044237//cellular metabolic process;GO:00…	-	-	-	-
Aradu.7VW0E	0	9.33333	0.001	0.48	8.90689	7.40625e-06	2.76843e-05	Aradu.7VW0E	P-loop containing nucleoside triphosphate hydrolases superfamily protein	-	-	-	-	-	-	-
Aradu.7X3HU	8.91333	0.666667	0.513333	0.0366667	-3.80735	4.12488e-06	1.58558e-05	Aradu.7X3HU	glyceraldehyde-3-phosphate dehydrogenase C2	-	GO:0050661//NADP binding;GO:0000166//nucleotide binding;GO:0036094//small molecule binding;GO:1901363//heterocyclic compound binding;GO:0051287//NAD binding;GO:0048037//cofactor binding;GO:1901265//nucleoside phosphate binding;GO:0050662//coenzyme binding;GO:0005488//binding;GO:0097159//organic cyclic compound binding	GO:0044699//single-organism process;GO:0005975//carbohydrate metabolic process;GO:0006006//glucose metabolic process;GO:0008152//metabolic process;GO:0044238//primary metabolic process;GO:0044723//single-organism carbohydrate metabolic process;GO:0071704//organic substance metabolic process;GO:0005996//monosaccharide metabolic process;GO:0055114//oxidation-reduction process;GO:0019318//hexose met…	Metabolism	Carbohydrate metabolism;Global and Overview;Energy metabolism	ko01200//Carbon metabolism;ko01230//Biosynthesis of amino acids;ko00010//Glycolysis / Gluconeogenesis;ko00710//Carbon fixation in photosynthetic organisms	K00134
Aradu.7X4NW	0.666667	7.22667	0.0166667	0.17	3.3505	0.000136785	0.000436767	Aradu.7X4NW	glutamate receptor 3.6	GO:0044425//membrane part;GO:0016020//membrane;GO:0016021//integral component of membrane;GO:0031224//intrinsic component of membrane	GO:0004930//G-protein coupled receptor activity;GO:0022836//gated channel activity;GO:0022891//substrate-specific transmembrane transporter activity;GO:0022834//ligand-gated channel activity;GO:0015075//ion transmembrane transporter activity;GO:0022803//passive transmembrane transporter activity;GO:0038023//signaling receptor activity;GO:0015267//channel activity;GO:0004888//transmembrane signali…	GO:0044763//single-organism cellular process;GO:0050789//regulation of biological process;GO:0065007//biological regulation;GO:0009987//cellular process;GO:0050896//response to stimulus;GO:0007166//cell surface receptor signaling pathway;GO:0051716//cellular response to stimulus;GO:0051234//establishment of localization;GO:0006810//transport;GO:0007186//G-protein coupled receptor signaling pathwa…	-	-	-	-
Aradu.7ZB45	2	20	0.0733333	0.716667	3.28876	5.03888e-09	2.54701e-08	Aradu.7ZB45	lectin protein kinase family protein	-	GO:0016773//phosphotransferase activity, alcohol group as acceptor;GO:0003824//catalytic activity;GO:0016740//transferase activity;GO:0004713//protein tyrosine kinase activity;GO:0016301//kinase activity;GO:0016772//transferase activity, transferring phosphorus-containing groups;GO:0004672//protein kinase activity	GO:0016310//phosphorylation;GO:0019538//protein metabolic process;GO:0044260//cellular macromolecule metabolic process;GO:0044699//single-organism process;GO:0044238//primary metabolic process;GO:0051704//multi-organism process;GO:0043412//macromolecule modification;GO:0032501//multicellular organismal process;GO:0006468//protein phosphorylation;GO:0044237//cellular metabolic process;GO:0048544//…	-	-	-	-
Aradu.7ZS3B	0.333333	14.0133	0.02	0.806667	5.3339	2.35873e-10	1.31856e-09	Aradu.7ZS3B	PREDICTED: uncharacterized protein LOC100793882 isoform X2	-	-	-	-	-	-	-
Aradu.8019V	228.61	52.3333	20.35	4.25	-2.25949	5.61024e-67	1.76374e-65	Aradu.8019V	GDSL-like lipase/acylhydrolase	-	GO:0003824//catalytic activity;GO:0016787//hydrolase activity	GO:0008152//metabolic process;GO:0044710//single-organism metabolic process;GO:0044699//single-organism process;GO:0006629//lipid metabolic process;GO:0071704//organic substance metabolic process;GO:0044238//primary metabolic process	-	-	-	-
Aradu.80RUZ	7.37667	36.6667	0.183333	0.843333	2.20163	8.56216e-12	5.2856e-11	Aradu.80RUZ	receptor-like serine/threonine kinase 2	-	GO:0043168//anion binding;GO:1901363//heterocyclic compound binding;GO:0016740//transferase activity;GO:0001882//nucleoside binding;GO:0000166//nucleotide binding;GO:0017076//purine nucleotide binding;GO:0097367//carbohydrate derivative binding;GO:0004672//protein kinase activity;GO:0032550//purine ribonucleoside binding;GO:1901265//nucleoside phosphate binding;GO:0030554//adenyl nucleotide bindi…	GO:0071704//organic substance metabolic process;GO:0044699//single-organism process;GO:0051704//multi-organism process;GO:0043412//macromolecule modification;GO:0044260//cellular macromolecule metabolic process;GO:0007154//cell communication;GO:0044763//single-organism cellular process;GO:0044267//cellular protein metabolic process;GO:0048544//recognition of pollen;GO:0036211//protein modificatio…	-	-	-	-
Aradu.80TED	60.41	1998.42	2.87333	86.8533	4.91778	0	0	Aradu.80TED	3-oxo-delta(4,5)-steroid 5-beta-reductase-like protein	-	-	-	-	-	-	-
Aradu.80WA5	132.07	1357.06	13.4	125.633	3.22891	2.71213e-181	3.19023e-179	Aradu.80WA5	disease-resistance response protein	-	-	GO:0006952//defense response;GO:0006950//response to stress;GO:0050896//response to stimulus;GO:0009607//response to biotic stimulus	-	-	-	-
Aradu.81HAH	126.05	21.9633	3.27	0.506667	-2.69018	1.04839e-39	1.8635e-38	Aradu.81HAH	PREDICTED: phosphate transporter PHO1 homolog 1-like isoform 1	GO:0016020//membrane;GO:0031224//intrinsic component of membrane;GO:0044425//membrane part;GO:0016021//integral component of membrane	-	-	-	-	-	-
Aradu.81KD9	0	7.65	0.001	2.59	11.3387	9.09757e-07	3.73968e-06	Aradu.81KD9	Stigma-specific Stig1 family protein	-	-	-	-	-	-	-
Aradu.826D1	242.293	37.5833	17.7633	2.58	-2.78346	8.61926e-73	2.96256e-71	Aradu.826D1	Pollen Ole e 1 allergen and extensin family protein	-	-	-	-	-	-	-
Aradu.82DSF	3967.35	34158.6	127.103	1012.98	2.99453	3.19311e-190	4.04492e-188	Aradu.82DSF	cytokinin oxidase/dehydrogenase 1	-	GO:0016614//oxidoreductase activity, acting on CH-OH group of donors;GO:0048037//cofactor binding;GO:0050660//flavin adenine dinucleotide binding;GO:1901363//heterocyclic compound binding;GO:0050662//coenzyme binding;GO:0043168//anion binding;GO:0008762//UDP-N-acetylmuramate dehydrogenase activity;GO:0016616//oxidoreductase activity, acting on the CH-OH group of donors, NAD or NADP as acceptor;GO…	GO:1901564//organonitrogen compound metabolic process;GO:0065007//biological regulation;GO:0071704//organic substance metabolic process;GO:0055114//oxidation-reduction process;GO:0034754//cellular hormone metabolic process;GO:0010817//regulation of hormone levels;GO:0044710//single-organism metabolic process;GO:0065008//regulation of biological quality;GO:0008152//metabolic process;GO:0006807//ni…	Metabolism	Metabolism of terpenoids and polyketides	ko00908//Zeatin biosynthesis	K00279
Aradu.82KWN	387.303	63.88	14.5433	2.21667	-2.71389	6.26836e-113	3.78202e-111	Aradu.82KWN	monogalactosyldiacylglycerol synthase 2	-	GO:0030246//carbohydrate binding;GO:0005488//binding	GO:0030259//lipid glycosylation;GO:0005975//carbohydrate metabolic process;GO:0008610//lipid biosynthetic process;GO:0030258//lipid modification;GO:0044763//single-organism cellular process;GO:0009058//biosynthetic process;GO:0070085//glycosylation;GO:0044723//single-organism carbohydrate metabolic process;GO:1901576//organic substance biosynthetic process;GO:0009987//cellular process;GO:0008152/…	Metabolism	Lipid metabolism	ko00561//Glycerolipid metabolism	K03715
Aradu.83KXV	4	28.5333	0.31	1.96333	2.66297	1.51771e-09	7.97614e-09	Aradu.83KXV	aldo/keto reductase family oxidoreductase	-	GO:0003824//catalytic activity;GO:0016491//oxidoreductase activity	GO:0008152//metabolic process;GO:0055114//oxidation-reduction process;GO:0044699//single-organism process;GO:0044710//single-organism metabolic process	-	-	-	-
Aradu.83UZ1	24.9967	171.33	2.04667	12.7333	2.63726	2.04167e-53	4.93589e-52	Aradu.83UZ1	Oxidative stress 3 n	-	-	-	-	-	-	-
Aradu.846E8	3	14	0.953333	4.09333	2.10222	4.0209e-05	0.000137453	Aradu.846E8	Pollen Ole e 1 allergen and extensin family protein	-	-	-	-	-	-	-
Aradu.8482Y	23.4733	120.533	12.5067	58.5567	2.22714	4.42383e-21	4.40973e-20	Aradu.8482Y	PREDICTED: organ-specific protein S2-like	-	-	-	-	-	-	-
Aradu.84FPB	9.51	2.65333	2.07667	0.516667	-2.00696	0.000405699	0.00121027	Aradu.84FPB	PREDICTED: uncharacterized protein LOC100786184	-	-	-	-	-	-	-
Aradu.84U8V	36.31	9	0.903333	0.203333	-2.15141	8.92628e-12	5.50189e-11	Aradu.84U8V	PREDICTED: protein YLS7-like	-	-	-	-	-	-	-
Aradu.853ZC	5.33	51	0.07	0.593333	3.08342	1.33628e-22	1.41436e-21	Aradu.853ZC	receptor-like serine/threonine kinase 2	-	GO:0043168//anion binding;GO:0035639//purine ribonucleoside triphosphate binding;GO:0004672//protein kinase activity;GO:0001882//nucleoside binding;GO:0032550//purine ribonucleoside binding;GO:1901363//heterocyclic compound binding;GO:0016772//transferase activity, transferring phosphorus-containing groups;GO:0005488//binding;GO:0003824//catalytic activity;GO:0016773//phosphotransferase activity,…	GO:0036211//protein modification process;GO:0044763//single-organism cellular process;GO:0006793//phosphorus metabolic process;GO:0043412//macromolecule modification;GO:0009856//pollination;GO:0006464//cellular protein modification process;GO:0044238//primary metabolic process;GO:0044260//cellular macromolecule metabolic process;GO:0044237//cellular metabolic process;GO:0008037//cell recognition;…	-	-	-	-
Aradu.85A6E	32.2933	377.947	1.22	13.1967	3.43522	9.82279e-135	7.61756e-133	Aradu.85A6E	polyvinylalcohol dehydrogenase-like protein	-	-	-	-	-	-	-
Aradu.85E8I	19.4933	95.2767	1.08667	4.92333	2.17973	2.49988e-24	2.83227e-23	Aradu.85E8I	trehalose-6-phosphate phosphatase	-	GO:0003824//catalytic activity	GO:0044711//single-organism biosynthetic process;GO:0005984//disaccharide metabolic process;GO:0034637//cellular carbohydrate biosynthetic process;GO:0044249//cellular biosynthetic process;GO:0044710//single-organism metabolic process;GO:0016051//carbohydrate biosynthetic process;GO:0005992//trehalose biosynthetic process;GO:0044237//cellular metabolic process;GO:0071704//organic substance metabo…	Metabolism	Carbohydrate metabolism	ko00500//Starch and sucrose metabolism	K01087
Aradu.86JNN	378.26	2019.74	2.68	13.1767	2.29768	2.49734e-183	2.98779e-181	Aradu.86JNN	pleiotropic drug resistance 12	GO:0016020//membrane	GO:0017111//nucleoside-triphosphatase activity;GO:0005524//ATP binding;GO:0043167//ion binding;GO:0001882//nucleoside binding;GO:0016462//pyrophosphatase activity;GO:1901265//nucleoside phosphate binding;GO:0036094//small molecule binding;GO:0016887//ATPase activity;GO:1901363//heterocyclic compound binding;GO:0032553//ribonucleotide binding;GO:0003824//catalytic activity;GO:0097159//organic cycl…	-	-	-	-	-
Aradu.86TPZ	17.9533	130.913	0.8	5.33667	2.73787	5.97896e-40	1.06921e-38	Aradu.86TPZ	pirin	-	-	-	-	-	-	-
Aradu.87ANX	9.66667	1.66667	1.17	0.183333	-2.67397	0.000140552	0.000447878	Aradu.87ANX	Unknown protein	-	-	-	-	-	-	-
Aradu.87YLX	39.6633	10.33	2.33	0.576667	-2.01452	3.00607e-09	1.5443e-08	Aradu.87YLX	PREDICTED: putative protein TPRXL-like isoform X2	-	-	-	-	-	-	-
Aradu.88EGA	45.4367	11.2733	3.02667	0.69	-2.13306	3.17812e-14	2.28459e-13	Aradu.88EGA	F-box family protein	-	GO:0005488//binding;GO:0005515//protein binding	-	-	-	-	-
Aradu.88M7D	14.6667	209.727	0.72	9.39	3.70506	3.64257e-84	1.50406e-82	Aradu.88M7D	Protein phosphatase 2C family protein	-	GO:0003824//catalytic activity	-	Environmental Information Processing	Signal transduction	ko04075//Plant hormone signal transduction	K14497
Aradu.88Z5A	89.4833	24.25	2.14333	0.53	-2.01579	3.95745e-21	3.95681e-20	Aradu.88Z5A	RNA-binding domain CCCH-type zinc finger protein	-	GO:0097159//organic cyclic compound binding;GO:0003676//nucleic acid binding;GO:1901363//heterocyclic compound binding;GO:0043167//ion binding;GO:0043169//cation binding;GO:0005488//binding;GO:0036094//small molecule binding;GO:0000166//nucleotide binding;GO:0046872//metal ion binding;GO:1901265//nucleoside phosphate binding	-	-	-	-	-
Aradu.892NG	199.9	51.5233	8.09333	1.91333	-2.08065	4.67886e-21	4.66229e-20	Aradu.892NG	Unknown protein	-	-	-	-	-	-	-
Aradu.8AQ1Z	49.0367	11.8067	2.85333	0.643333	-2.14901	2.76378e-12	1.76329e-11	Aradu.8AQ1Z	Peroxidase superfamily protein	-	GO:0016209//antioxidant activity;GO:1901363//heterocyclic compound binding;GO:0003824//catalytic activity;GO:0020037//heme binding;GO:0016684//oxidoreductase activity, acting on peroxide as acceptor;GO:0016491//oxidoreductase activity;GO:0097159//organic cyclic compound binding;GO:0046906//tetrapyrrole binding;GO:0004601//peroxidase activity;GO:0005488//binding	GO:0006950//response to stress;GO:0044699//single-organism process;GO:0006979//response to oxidative stress;GO:0008152//metabolic process;GO:0050896//response to stimulus;GO:0044710//single-organism metabolic process;GO:0055114//oxidation-reduction process	Metabolism	Biosynthesis of other secondary metabolites	ko00940//Phenylpropanoid biosynthesis	K00430
Aradu.8BQ4V	0.666667	11.86	0.0266667	0.416667	3.96578	4.54121e-07	1.92204e-06	Aradu.8BQ4V	PREDICTED: aldehyde dehydrogenase family 3 member F1-like	-	GO:0016491//oxidoreductase activity;GO:0016620//oxidoreductase activity, acting on the aldehyde or oxo group of donors, NAD or NADP as acceptor;GO:0004030//aldehyde dehydrogenase [NAD(P)+] activity;GO:0016903//oxidoreductase activity, acting on the aldehyde or oxo group of donors;GO:0003824//catalytic activity	GO:0044699//single-organism process;GO:0055114//oxidation-reduction process;GO:0009987//cellular process;GO:0044763//single-organism cellular process;GO:0008152//metabolic process;GO:0006081//cellular aldehyde metabolic process;GO:0044710//single-organism metabolic process;GO:0071704//organic substance metabolic process;GO:0044237//cellular metabolic process	Metabolism	Lipid metabolism;Metabolism of other amino acids;Metabolism of terpenoids and polyketides;Carbohydrate metabolism;Amino acid metabolism	ko00010//Glycolysis / Gluconeogenesis;ko00620//Pyruvate metabolism;ko00040//Pentose and glucuronate interconversions;ko00561//Glycerolipid metabolism;ko00071//Fatty acid degradation;ko00330//Arginine and proline metabolism;ko00280//Valine, leucine and isoleucine degradation;ko00053//Ascorbate and aldarate metabolism;ko00410//beta-Alanine metabolism;ko00380//Tryptophan metabolism;ko00310//Lysine d…	K00128
Aradu.8CI8S	6.33333	68.88	1.06	10.64	3.32736	4.64038e-27	5.78533e-26	Aradu.8CI8S	PREDICTED: zinc finger protein CONSTANS-like	GO:0005623//cell;GO:0044464//cell part;GO:0005622//intracellular	GO:0008270//zinc ion binding;GO:0043167//ion binding;GO:0046872//metal ion binding;GO:0005488//binding;GO:0043169//cation binding;GO:0046914//transition metal ion binding	-	-	-	-	-
Aradu.8D3SW	279.843	1540	6.26333	31.97	2.35172	2.64087e-61	7.45286e-60	Aradu.8D3SW	lipoxygenase 3	-	-	-	Metabolism	Lipid metabolism	ko00592//alpha-Linolenic acid metabolism;ko00591//Linoleic acid metabolism	K00454
Aradu.8GL4A	19.3767	5.38	0.493333	0.123333	-2	3.73267e-05	0.000128108	Aradu.8GL4A	receptor-like protein kinase 2	-	GO:0005515//protein binding;GO:0005488//binding	-	-	-	-	-
Aradu.8GP5U	329.503	1597.59	11.7633	52.9567	2.17052	1.01644e-53	2.47118e-52	Aradu.8GP5U	fatty acid desaturase 8	-	-	GO:0008152//metabolic process;GO:0044238//primary metabolic process;GO:0055114//oxidation-reduction process;GO:0044710//single-organism metabolic process;GO:0006629//lipid metabolic process;GO:0071704//organic substance metabolic process;GO:0044699//single-organism process	Metabolism	Lipid metabolism;Global and Overview	ko01212//Fatty acid metabolism;ko01040//Biosynthesis of unsaturated fatty acids	K10257
Aradu.8H8GJ	6.94333	0	0.396667	0.001	-8.63178	5.92069e-06	2.23401e-05	Aradu.8H8GJ	Pentatricopeptide repeat (PPR) superfamily protein	-	GO:0005319//lipid transporter activity;GO:0005215//transporter activity;GO:0022892//substrate-specific transporter activity	GO:0071702//organic substance transport;GO:0051179//localization;GO:0051234//establishment of localization;GO:1902578//single-organism localization;GO:0006810//transport;GO:0033036//macromolecule localization;GO:0044765//single-organism transport;GO:0010876//lipid localization;GO:0006869//lipid transport;GO:0044699//single-organism process	-	-	-	-
Aradu.8IA8J	12.7267	2.19	0.23	0.0333333	-2.7866	2.32456e-05	8.17555e-05	Aradu.8IA8J	disease resistance protein (TIR-NBS-LRR class), putative	-	GO:0097367//carbohydrate derivative binding;GO:0043168//anion binding;GO:0032553//ribonucleotide binding;GO:1901363//heterocyclic compound binding;GO:0030554//adenyl nucleotide binding;GO:0032559//adenyl ribonucleotide binding;GO:0000166//nucleotide binding;GO:0043531//ADP binding;GO:0001882//nucleoside binding;GO:0036094//small molecule binding;GO:0097159//organic cyclic compound binding;GO:0005…	GO:0006950//response to stress;GO:0050896//response to stimulus;GO:0006952//defense response	-	-	-	-
Aradu.8J00F	112.667	1252.33	4.37333	44.5033	3.34711	2.9721e-261	6.52591e-259	Aradu.8J00F	Cytochrome P450 superfamily protein	-	GO:0046872//metal ion binding;GO:0097159//organic cyclic compound binding;GO:0005506//iron ion binding;GO:1901363//heterocyclic compound binding;GO:0020037//heme binding;GO:0043167//ion binding;GO:0043169//cation binding;GO:0046906//tetrapyrrole binding;GO:0005488//binding;GO:0046914//transition metal ion binding	GO:0055114//oxidation-reduction process;GO:0044710//single-organism metabolic process;GO:0008152//metabolic process;GO:0044699//single-organism process	-	-	-	-
Aradu.8KW68	22.9733	490.743	1.17667	23.17	4.29948	4.75207e-175	5.22737e-173	Aradu.8KW68	cysteine proteinase1	-	GO:0008234//cysteine-type peptidase activity;GO:0008233//peptidase activity;GO:0016787//hydrolase activity;GO:0003824//catalytic activity;GO:0070011//peptidase activity, acting on L-amino acid peptides	GO:0019538//protein metabolic process;GO:0008152//metabolic process;GO:0006508//proteolysis;GO:0044238//primary metabolic process;GO:0043170//macromolecule metabolic process;GO:0071704//organic substance metabolic process	-	-	-	-
Aradu.8L0QQ	10.6433	0.333333	1.28667	0.04	-5.00749	1.09746e-08	5.3963e-08	Aradu.8L0QQ	polynucleotide phosphatase/kinase	-	-	-	-	-	-	-
Aradu.8L8L4	3201.24	77.7367	156.573	3.53333	-5.46966	0	0	Aradu.8L8L4	tubulin beta chain 2	GO:0044430//cytoskeletal part;GO:0044422//organelle part;GO:0032991//macromolecular complex;GO:0043232//intracellular non-membrane-bounded organelle;GO:0043229//intracellular organelle;GO:0005856//cytoskeleton;GO:0044446//intracellular organelle part;GO:0005623//cell;GO:0005622//intracellular;GO:0044464//cell part;GO:0005874//microtubule;GO:0043228//non-membrane-bounded organelle;GO:0044424//intr…	GO:0036094//small molecule binding;GO:0019001//guanyl nucleotide binding;GO:1901265//nucleoside phosphate binding;GO:0043167//ion binding;GO:0035639//purine ribonucleoside triphosphate binding;GO:0001883//purine nucleoside binding;GO:0032553//ribonucleotide binding;GO:0005488//binding;GO:0032555//purine ribonucleotide binding;GO:0032561//guanyl ribonucleotide binding;GO:0017111//nucleoside-tripho…	GO:0022607//cellular component assembly;GO:0034622//cellular macromolecular complex assembly;GO:0051258//protein polymerization;GO:0006461//protein complex assembly;GO:0016043//cellular component organization;GO:0044699//single-organism process;GO:0070271//protein complex biogenesis;GO:0065003//macromolecular complex assembly;GO:0044085//cellular component biogenesis;GO:0043623//cellular protein …	Cellular Processes	Transport and catabolism	ko04145//Phagosome	K07375
Aradu.8L8WW	10.3333	0.333333	1.49333	0.04	-5.22239	3.55708e-08	1.67337e-07	Aradu.8L8WW	Nucleic acid binding protein n	-	GO:0097159//organic cyclic compound binding;GO:0005488//binding;GO:1901363//heterocyclic compound binding;GO:0003676//nucleic acid binding	-	-	-	-	-
Aradu.8LX7K	565.79	3501.11	13.7033	77.9067	2.50722	0	0	Aradu.8LX7K	UDP-Glycosyltransferase superfamily protein	-	-	GO:0008152//metabolic process	-	-	-	-
Aradu.8NU6I	0.68	16.3567	0.116667	2.67	4.51638	2.43343e-11	1.45956e-10	Aradu.8NU6I	unknown protein	-	-	-	-	-	-	-
Aradu.8QB2V	18.3467	4.66667	0.576667	0.13	-2.14923	4.12946e-07	1.75493e-06	Aradu.8QB2V	PREDICTED: acyl-CoA-binding domain-containing protein 4-like isoform X2	-	GO:0005488//binding;GO:0005515//protein binding	-	-	-	-	-
Aradu.8QG2W	0	4	0.001	0.163333	7.35168	0.00204475	0.00546375	Aradu.8QG2W	PREDICTED: zinc finger protein CONSTANS-LIKE 16-like	-	GO:0005488//binding;GO:0005515//protein binding	-	-	-	-	-
Aradu.8RX2Y	56.6567	10.6667	7.48667	1.27	-2.5595	2.15528e-22	2.26622e-21	Aradu.8RX2Y	Late embryogenesis abundant (LEA) hydroxyproline-rich glycoprotein family	-	-	-	-	-	-	-
Aradu.8VB5P	68.3367	307.667	9.91	40.2433	2.02179	4.06611e-39	7.12568e-38	Aradu.8VB5P	HVA22 homologue D	-	-	-	-	-	-	-
Aradu.8VI8X	343.603	46.2367	14.9867	1.85667	-3.01289	1.60652e-113	9.76662e-112	Aradu.8VI8X	pectinesterase 11	GO:0071944//cell periphery;GO:0044464//cell part;GO:0005623//cell;GO:0005618//cell wall;GO:0030312//external encapsulating structure	GO:0030599//pectinesterase activity;GO:0052689//carboxylic ester hydrolase activity;GO:0003824//catalytic activity;GO:0016788//hydrolase activity, acting on ester bonds;GO:0016787//hydrolase activity	GO:0071554//cell wall organization or biogenesis;GO:0045229//external encapsulating structure organization;GO:0016043//cellular component organization;GO:0009987//cellular process;GO:0071555//cell wall organization;GO:0042545//cell wall modification;GO:0071840//cellular component organization or biogenesis	Metabolism	Carbohydrate metabolism	ko00500//Starch and sucrose metabolism;ko00040//Pentose and glucuronate interconversions	K01051
Aradu.8WS4M	2918.15	17659	199.54	1100.94	2.46398	6.09059e-132	4.57129e-130	Aradu.8WS4M	disease-resistance response protein	-	-	GO:0009607//response to biotic stimulus;GO:0050896//response to stimulus;GO:0006952//defense response;GO:0006950//response to stress	-	-	-	-
Aradu.8X6ET	16.5667	366.523	1.02667	20.83	4.34262	1.08469e-134	8.40016e-133	Aradu.8X6ET	PATATIN-like protein 4	-	-	GO:0044699//single-organism process;GO:0006629//lipid metabolic process;GO:0071704//organic substance metabolic process;GO:0008152//metabolic process;GO:0044238//primary metabolic process;GO:0044710//single-organism metabolic process	-	-	-	-
Aradu.8YW3C	0	4.5	0.001	0.373333	8.54432	0.00040438	0.00120665	Aradu.8YW3C	Unknown protein	-	-	-	-	-	-	-
Aradu.8Z41T	5.66667	81.5333	0.133333	1.75333	3.71699	2.53645e-40	4.57829e-39	Aradu.8Z41T	PREDICTED: metal-nicotianamine transporter YSL3-like isoform X3	-	-	GO:0051234//establishment of localization;GO:1902578//single-organism localization;GO:0006810//transport;GO:0044765//single-organism transport;GO:0009987//cellular process;GO:0051179//localization;GO:0044763//single-organism cellular process;GO:0055085//transmembrane transport;GO:0044699//single-organism process	-	-	-	-
Aradu.8ZG8V	207.297	51.63	20.55	4.68667	-2.1325	9.91062e-59	2.65887e-57	Aradu.8ZG8V	2,3-diketo-5-methylthio-1-phosphopentane phosphatase	-	GO:0042578//phosphoric ester hydrolase activity;GO:0016787//hydrolase activity;GO:0016791//phosphatase activity;GO:0016788//hydrolase activity, acting on ester bonds;GO:0003824//catalytic activity	GO:0008152//metabolic process	Metabolism	Metabolism of cofactors and vitamins	ko00750//Vitamin B6 metabolism	K13248
Aradu.90QAV	41.3333	380.007	2.48333	21.07	3.08484	5.48831e-118	3.48803e-116	Aradu.90QAV	MTD1 n	-	-	-	-	-	-	-
Aradu.91S58	773.343	170.043	68.04	13.7867	-2.30311	2.30365e-144	1.95727e-142	Aradu.91S58	nodulin MtN21 /EamA-like transporter family protein	GO:0016020//membrane	-	-	-	-	-	-
Aradu.91WF3	6.25667	35.7967	0.156667	0.85	2.43976	4.13351e-12	2.6063e-11	Aradu.91WF3	cyclic nucleotide-gated ion channel-like protein	GO:0016020//membrane	GO:0022890//inorganic cation transmembrane transporter activity;GO:0005261//cation channel activity;GO:0015267//channel activity;GO:0015075//ion transmembrane transporter activity;GO:0022832//voltage-gated channel activity;GO:0005249//voltage-gated potassium channel activity;GO:0022836//gated channel activity;GO:0005244//voltage-gated ion channel activity;GO:0022803//passive transmembrane transpo…	GO:1902578//single-organism localization;GO:0044699//single-organism process;GO:0006812//cation transport;GO:0030001//metal ion transport;GO:0006813//potassium ion transport;GO:0044763//single-organism cellular process;GO:0006810//transport;GO:0051179//localization;GO:0044765//single-organism transport;GO:0051234//establishment of localization;GO:0055085//transmembrane transport;GO:0009987//cellu…	Organismal Systems	Environmental adaptation	ko04626//Plant-pathogen interaction	K05391
Aradu.92ZAJ	2	101.82	0.153333	7.12	5.53713	1.30571e-63	3.8661e-62	Aradu.92ZAJ	plastocyanin-like domain protein	-	GO:0043169//cation binding;GO:0009055//electron carrier activity;GO:0046914//transition metal ion binding;GO:0046872//metal ion binding;GO:0005488//binding;GO:0005507//copper ion binding;GO:0043167//ion binding	-	-	-	-	-
Aradu.93CE1	4.66667	41.85	0.303333	2.52667	3.05826	3.97443e-19	3.65646e-18	Aradu.93CE1	proton pump interactor, putative	-	-	-	-	-	-	-
Aradu.93CHA	625.333	5634.67	28.79	237.96	3.04708	0	0	Aradu.93CHA	PREDICTED: isoflavone reductase homolog	-	-	-	-	-	-	-
Aradu.945F4	46.19	9.96667	1.71667	0.34	-2.336	6.4887e-17	5.36645e-16	Aradu.945F4	PREDICTED: putative pectinesterase/pectinesterase inhibitor 24-like	GO:0030312//external encapsulating structure;GO:0005618//cell wall;GO:0005623//cell;GO:0071944//cell periphery;GO:0044464//cell part	GO:0052689//carboxylic ester hydrolase activity;GO:0003824//catalytic activity;GO:0004857//enzyme inhibitor activity;GO:0098772//molecular function regulator;GO:0016788//hydrolase activity, acting on ester bonds;GO:0016787//hydrolase activity;GO:0030599//pectinesterase activity;GO:0030234//enzyme regulator activity	GO:0071554//cell wall organization or biogenesis;GO:0071555//cell wall organization;GO:0009987//cellular process;GO:0071840//cellular component organization or biogenesis;GO:0042545//cell wall modification;GO:0016043//cellular component organization;GO:0045229//external encapsulating structure organization	-	-	-	-
Aradu.951UC	1086.11	6552.85	23.13	128.02	2.46853	1.64016e-238	3.01096e-236	Aradu.951UC	seed linoleate 9S-lipoxygenase	-	GO:0043169//cation binding;GO:0046872//metal ion binding;GO:0003824//catalytic activity;GO:0016702//oxidoreductase activity, acting on single donors with incorporation of molecular oxygen, incorporation of two atoms of oxygen;GO:0016701//oxidoreductase activity, acting on single donors with incorporation of molecular oxygen;GO:0016491//oxidoreductase activity;GO:0005506//iron ion binding;GO:00054…	GO:0044699//single-organism process;GO:0055114//oxidation-reduction process;GO:0008152//metabolic process;GO:0044710//single-organism metabolic process	Metabolism	Lipid metabolism	ko00591//Linoleic acid metabolism	K15718
Aradu.95872	5.33333	0.666667	0.163333	0.0166667	-3.29278	0.00121748	0.00337282	Aradu.95872	Uncharacterized protein family (UPF0016)	GO:0016020//membrane	-	-	-	-	-	-
Aradu.95I5L	17.68	4.01	0.433333	0.09	-2.26748	4.94074e-06	1.88355e-05	Aradu.95I5L	PREDICTED: uncharacterized protein LOC102662126	-	-	-	-	-	-	-
Aradu.97LA5	290.803	45.5	10.8867	1.59667	-2.76943	1.24954e-62	3.63255e-61	Aradu.97LA5	D-arabinono-1,4-lactone oxidase family protein	GO:0016020//membrane	GO:0008762//UDP-N-acetylmuramate dehydrogenase activity;GO:0005488//binding;GO:0043168//anion binding;GO:0016616//oxidoreductase activity, acting on the CH-OH group of donors, NAD or NADP as acceptor;GO:1901363//heterocyclic compound binding;GO:0050660//flavin adenine dinucleotide binding;GO:0036094//small molecule binding;GO:0043167//ion binding;GO:0048037//cofactor binding;GO:0016614//oxidoredu…	GO:0044710//single-organism metabolic process;GO:0008152//metabolic process;GO:0044699//single-organism process;GO:0055114//oxidation-reduction process	-	-	-	-
Aradu.97WXZ	8.79	2.29667	0.403333	0.0966667	-2.06088	0.00351286	0.00898128	Aradu.97WXZ	Pyruvate kinase family protein	-	GO:0031420//alkali metal ion binding;GO:0003824//catalytic activity;GO:0043169//cation binding;GO:0046872//metal ion binding;GO:0016773//phosphotransferase activity, alcohol group as acceptor;GO:0005488//binding;GO:0016301//kinase activity;GO:0016740//transferase activity;GO:0005515//protein binding;GO:0000287//magnesium ion binding;GO:0030955//potassium ion binding;GO:0016772//transferase activi…	GO:1901575//organic substance catabolic process;GO:0006725//cellular aromatic compound metabolic process;GO:0044281//small molecule metabolic process;GO:0006139//nucleobase-containing compound metabolic process;GO:0044238//primary metabolic process;GO:0044724//single-organism carbohydrate catabolic process;GO:0006733//oxidoreduction coenzyme metabolic process;GO:0055086//nucleobase-containing sma…	Metabolism	Global and Overview;Nucleotide metabolism;Carbohydrate metabolism	ko01200//Carbon metabolism;ko01230//Biosynthesis of amino acids;ko00230//Purine metabolism;ko00010//Glycolysis / Gluconeogenesis;ko00620//Pyruvate metabolism	K00873
Aradu.980UL	650.333	164.65	40.7433	9.47	-2.10513	9.22856e-121	6.01532e-119	Aradu.980UL	unknown protein	-	-	-	-	-	-	-
Aradu.98BS6	8	45	0.596667	3.12	2.38655	2.46687e-15	1.88306e-14	Aradu.98BS6	Unknown protein	-	-	-	-	-	-	-
Aradu.98VQZ	0.726667	7.74667	0.0233333	0.233333	3.32193	7.18183e-05	0.000238165	Aradu.98VQZ	PREDICTED: probable pectinesterase/pectinesterase inhibitor 21-like	GO:0030312//external encapsulating structure;GO:0044464//cell part;GO:0005623//cell;GO:0005618//cell wall;GO:0071944//cell periphery	GO:0003824//catalytic activity;GO:0004857//enzyme inhibitor activity;GO:0016787//hydrolase activity;GO:0016788//hydrolase activity, acting on ester bonds;GO:0030234//enzyme regulator activity;GO:0052689//carboxylic ester hydrolase activity;GO:0030599//pectinesterase activity;GO:0098772//molecular function regulator	GO:0071555//cell wall organization;GO:0071554//cell wall organization or biogenesis;GO:0016043//cellular component organization;GO:0009987//cellular process;GO:0071840//cellular component organization or biogenesis;GO:0045229//external encapsulating structure organization;GO:0042545//cell wall modification	Metabolism	Carbohydrate metabolism	ko00500//Starch and sucrose metabolism;ko00040//Pentose and glucuronate interconversions	K01051
Aradu.99PKX	11.91	3.16333	1.04333	0.246667	-2.08057	0.000321274	0.00097256	Aradu.99PKX	PREDICTED: protein FAR1-RELATED SEQUENCE 3-like isoform X2	-	GO:0097159//organic cyclic compound binding;GO:0043167//ion binding;GO:1901363//heterocyclic compound binding;GO:0046914//transition metal ion binding;GO:0003676//nucleic acid binding;GO:0046872//metal ion binding;GO:0005488//binding;GO:0043169//cation binding;GO:0008270//zinc ion binding	-	-	-	-	-
Aradu.9A5PX	47.7667	237.557	1.59333	7.27667	2.19123	1.07425e-53	2.6106e-52	Aradu.9A5PX	Rhamnogalacturonate lyase family protein	-	GO:0003824//catalytic activity;GO:0005488//binding;GO:0030246//carbohydrate binding	GO:0008152//metabolic process;GO:0005975//carbohydrate metabolic process;GO:0071704//organic substance metabolic process;GO:0044238//primary metabolic process	-	-	-	-
Aradu.9BM9J	1443.45	15538.2	62.35	617.737	3.30853	0	0	Aradu.9BM9J	PREDICTED: chalcone synthase	-	GO:0003824//catalytic activity	GO:0009058//biosynthetic process;GO:0008152//metabolic process	Metabolism;Organismal Systems	Biosynthesis of other secondary metabolites;Environmental adaptation	ko04712//Circadian rhythm - plant;ko00941//Flavonoid biosynthesis	K00660
Aradu.9C9ZX	461.887	3901.09	19.9833	153.513	2.94149	1.54739e-168	1.61642e-166	Aradu.9C9ZX	receptor lectin kinase	-	GO:0030246//carbohydrate binding;GO:0005488//binding	-	-	-	-	-
Aradu.9D0F2	80.94	21.53	2.62667	0.656667	-2	3.64679e-18	3.20093e-17	Aradu.9D0F2	PREDICTED: DNA ligase 1-like	-	-	-	-	-	-	-
Aradu.9D9RN	34.2267	216.223	0.76	4.37333	2.52466	1.54267e-53	3.74244e-52	Aradu.9D9RN	ATP-binding ABC transporter	GO:0016020//membrane	GO:0032553//ribonucleotide binding;GO:0032555//purine ribonucleotide binding;GO:0036094//small molecule binding;GO:0043168//anion binding;GO:0003824//catalytic activity;GO:0016462//pyrophosphatase activity;GO:0097159//organic cyclic compound binding;GO:0017076//purine nucleotide binding;GO:0016887//ATPase activity;GO:0035639//purine ribonucleoside triphosphate binding;GO:0005488//binding;GO:00325…	-	-	-	-	-
Aradu.9DD9N	42.04	4.95	2.56667	0.293333	-3.12928	5.68446e-16	4.48785e-15	Aradu.9DD9N	myb transcription factor	-	GO:0005488//binding;GO:1901363//heterocyclic compound binding;GO:0044877//macromolecular complex binding;GO:0003677//DNA binding;GO:0003676//nucleic acid binding;GO:0003682//chromatin binding;GO:0097159//organic cyclic compound binding	-	-	-	-	-
Aradu.9F1L9	104.167	25.6667	2.82	0.623333	-2.17762	1.26703e-21	1.29504e-20	Aradu.9F1L9	Pentatricopeptide repeat (PPR) superfamily protein	-	GO:0005488//binding;GO:0005515//protein binding	-	-	-	-	-
Aradu.9F1YG	7.33333	0.666667	1.99333	0.143333	-3.79774	3.30813e-05	0.000114287	Aradu.9F1YG	PREDICTED: root meristem growth factor 2-like isoform X2	-	-	-	-	-	-	-
Aradu.9FE11	14.0567	115.917	0.656667	4.90667	2.90151	3.98374e-41	7.37367e-40	Aradu.9FE11	triacylglycerol lipase-like 1	-	GO:0003824//catalytic activity;GO:0016788//hydrolase activity, acting on ester bonds;GO:0016298//lipase activity;GO:0016787//hydrolase activity;GO:0004806//triglyceride lipase activity;GO:0052689//carboxylic ester hydrolase activity	GO:0006629//lipid metabolic process;GO:0044710//single-organism metabolic process;GO:0044238//primary metabolic process;GO:0044699//single-organism process;GO:0008152//metabolic process;GO:0071704//organic substance metabolic process	-	-	-	-
Aradu.9HU91	0	11	0.001	1.91667	10.9044	1.32693e-09	7.01567e-09	Aradu.9HU91	PREDICTED: uncharacterized protein LOC102667041	-	-	-	-	-	-	-
Aradu.9I4XH	354.563	48.6367	69.89	8.92	-2.96997	3.80857e-59	1.02868e-57	Aradu.9I4XH	Protein of unknown function, DUF538	-	-	-	-	-	-	-
Aradu.9I74V	1	6.64667	0.0966667	0.576667	2.57665	0.00127537	0.00352273	Aradu.9I74V	DUF241 domain protein	-	-	-	-	-	-	-
Aradu.9L81W	26.5167	120.513	2.28333	9.65	2.07939	2.35044e-22	2.46772e-21	Aradu.9L81W	unknown protein	-	GO:0031072//heat shock protein binding;GO:0005515//protein binding;GO:0051082//unfolded protein binding;GO:0005488//binding	-	-	-	-	-
Aradu.9MF3N	4	24.3867	0.526667	2.83	2.42584	5.41848e-08	2.50815e-07	Aradu.9MF3N	chlororespiratory reduction protein	-	-	-	-	-	-	-
Aradu.9NA8Q	4.6	0.333333	0.13	0.01	-3.70044	0.00245501	0.00646194	Aradu.9NA8Q	Protein kinase superfamily protein	-	GO:0004672//protein kinase activity;GO:0003824//catalytic activity;GO:0005515//protein binding;GO:1901265//nucleoside phosphate binding;GO:0097367//carbohydrate derivative binding;GO:0000166//nucleotide binding;GO:0016772//transferase activity, transferring phosphorus-containing groups;GO:1901363//heterocyclic compound binding;GO:0030554//adenyl nucleotide binding;GO:0017076//purine nucleotide bi…	GO:0044706//multi-multicellular organism process;GO:0009875//pollen-pistil interaction;GO:0006468//protein phosphorylation;GO:0007154//cell communication;GO:0044267//cellular protein metabolic process;GO:0032501//multicellular organismal process;GO:0044238//primary metabolic process;GO:0009987//cellular process;GO:0006793//phosphorus metabolic process;GO:0044699//single-organism process;GO:003621…	-	-	-	-
Aradu.9P4TN	10	0.333333	0.273333	0.00666667	-5.35755	1.1782e-06	4.78868e-06	Aradu.9P4TN	PREDICTED: protein FAR1-RELATED SEQUENCE 3-like isoform X1	-	GO:0005488//binding;GO:0008270//zinc ion binding;GO:0043169//cation binding;GO:0046914//transition metal ion binding;GO:0046872//metal ion binding;GO:0043167//ion binding	-	-	-	-	-
Aradu.9R9X3	14.6267	88.2367	0.513333	2.79	2.4423	9.5323e-28	1.21549e-26	Aradu.9R9X3	serine-glyoxylate aminotransferase-like protein	-	GO:0003824//catalytic activity;GO:0043168//anion binding;GO:1901363//heterocyclic compound binding;GO:0005488//binding;GO:0043167//ion binding;GO:0097159//organic cyclic compound binding;GO:0048037//cofactor binding;GO:0030170//pyridoxal phosphate binding	GO:0008152//metabolic process	Cellular Processes;Metabolism	Transport and catabolism;Global and Overview;Carbohydrate metabolism;Amino acid metabolism	ko01200//Carbon metabolism;ko04146//Peroxisome;ko00260//Glycine, serine and threonine metabolism;ko00630//Glyoxylate and dicarboxylate metabolism;ko00250//Alanine, aspartate and glutamate metabolism	K00830
Aradu.9RQ53	183.103	877.177	10.1867	45.1467	2.14794	5.72397e-98	2.89251e-96	Aradu.9RQ53	GDSL-like Lipase/Acylhydrolase superfamily protein	-	GO:0003824//catalytic activity;GO:0016787//hydrolase activity	GO:0044238//primary metabolic process;GO:0071704//organic substance metabolic process;GO:0006629//lipid metabolic process;GO:0044699//single-organism process;GO:0044710//single-organism metabolic process;GO:0008152//metabolic process	-	-	-	-
Aradu.9SB6V	18.15	123.627	1.85667	11.4833	2.62875	5.36162e-40	9.59726e-39	Aradu.9SB6V	PREDICTED: GTP-binding nuclear protein Ran-3	GO:0016020//membrane;GO:0005623//cell;GO:0005622//intracellular;GO:0044464//cell part	GO:0016817//hydrolase activity, acting on acid anhydrides;GO:0036094//small molecule binding;GO:0003824//catalytic activity;GO:0003924//GTPase activity;GO:0019001//guanyl nucleotide binding;GO:0001882//nucleoside binding;GO:1901363//heterocyclic compound binding;GO:0043168//anion binding;GO:0035639//purine ribonucleoside triphosphate binding;GO:0017111//nucleoside-triphosphatase activity;GO:00973…	GO:0051169//nuclear transport;GO:0035556//intracellular signal transduction;GO:0065007//biological regulation;GO:0050789//regulation of biological process;GO:0007154//cell communication;GO:0009987//cellular process;GO:0006886//intracellular protein transport;GO:0006810//transport;GO:0006913//nucleocytoplasmic transport;GO:0007165//signal transduction;GO:0044763//single-organism cellular process;G…	-	-	-	-
Aradu.9T74D	62.54	353.627	1.99	10.29	2.3704	5.9584e-84	2.45306e-82	Aradu.9T74D	electron-transfer flavoprotein:ubiquinone oxidoreductase	-	GO:0003824//catalytic activity;GO:0016491//oxidoreductase activity;GO:0016645//oxidoreductase activity, acting on the CH-NH group of donors;GO:0016649//oxidoreductase activity, acting on the CH-NH group of donors, quinone or similar compound as acceptor;GO:0004174//electron-transferring-flavoprotein dehydrogenase activity	GO:0044699//single-organism process;GO:0008152//metabolic process;GO:0044710//single-organism metabolic process;GO:0055114//oxidation-reduction process	-	-	-	-
Aradu.9TG4T	486.11	115.297	12.41	2.72333	-2.18806	6.47578e-76	2.35598e-74	Aradu.9TG4T	PREDICTED: probable xyloglucan glycosyltransferase 12-like	-	-	-	-	-	-	-
Aradu.9U8X7	0.346667	5.36333	0.07	1.05	3.90689	0.000933295	0.00263215	Aradu.9U8X7	hypothetical protein	-	-	-	-	-	-	-
Aradu.9VJ86	109.313	24.17	9.45667	1.87333	-2.33572	1.70625e-30	2.38658e-29	Aradu.9VJ86	PREDICTED: uncharacterized protein LOC100780249	-	-	-	-	-	-	-
Aradu.9XI8P	149.627	36.53	4.41	0.97	-2.18472	1.80154e-42	3.45564e-41	Aradu.9XI8P	ferric reduction oxidase 7	-	GO:0016491//oxidoreductase activity;GO:0003824//catalytic activity	GO:0044699//single-organism process;GO:0055114//oxidation-reduction process;GO:0044710//single-organism metabolic process;GO:0008152//metabolic process	-	-	-	-
Aradu.9Y5KL	0	12.67	0.001	1.04	10.0224	2.3991e-10	1.34047e-09	Aradu.9Y5KL	Pollen Ole e 1 allergen and extensin family protein	-	-	-	-	-	-	-
Aradu.9Z0RX	0.333333	504.667	0.02	25.4033	10.3108	8.18327e-204	1.17184e-201	Aradu.9Z0RX	late embryogenesis abundant protein, putative	-	-	-	-	-	-	-
Aradu.9ZP9L	26	256.63	3.03	27.0933	3.16055	8.38808e-67	2.62378e-65	Aradu.9ZP9L	ribonuclease 1	-	GO:0005488//binding;GO:0016787//hydrolase activity;GO:0003676//nucleic acid binding;GO:0003824//catalytic activity;GO:1901363//heterocyclic compound binding;GO:0003723//RNA binding;GO:0016894//endonuclease activity, active with either ribo- or deoxyribonucleic acids and producing 3'-phosphomonoesters;GO:0016892//endoribonuclease activity, producing 3'-phosphomonoesters;GO:0004519//endonuclease ac…	-	-	-	-	-
Aradu.A02RY	0	6	0.001	0.42	8.71425	2.29119e-05	8.06172e-05	Aradu.A02RY	seed maturation protein	-	-	GO:0048856//anatomical structure development;GO:0007275//multicellular organismal development;GO:0044767//single-organism developmental process;GO:0044707//single-multicellular organism process;GO:0032501//multicellular organismal process;GO:0032502//developmental process;GO:0044699//single-organism process;GO:0009790//embryo development	-	-	-	-
Aradu.A058G	206.87	976.133	6.34667	27.4633	2.11344	1.35491e-133	1.03215e-131	Aradu.A058G	peptide transporter 1	GO:0016020//membrane	GO:0005215//transporter activity	GO:0051179//localization;GO:0006810//transport;GO:0051234//establishment of localization	-	-	-	-
Aradu.A0DVE	9.74333	62.5067	0.17	1.01	2.57075	3.24833e-23	3.52543e-22	Aradu.A0DVE	disease resistance protein (TIR-NBS-LRR class), putative	-	GO:0016787//hydrolase activity;GO:0001883//purine nucleoside binding;GO:1901265//nucleoside phosphate binding;GO:0003824//catalytic activity;GO:0097159//organic cyclic compound binding;GO:1901363//heterocyclic compound binding;GO:0001882//nucleoside binding;GO:0032553//ribonucleotide binding;GO:0030554//adenyl nucleotide binding;GO:0016462//pyrophosphatase activity;GO:0016818//hydrolase activity,…	GO:0007154//cell communication;GO:0051716//cellular response to stimulus;GO:0009987//cellular process;GO:0050794//regulation of cellular process;GO:0044700//single organism signaling;GO:0023052//signaling;GO:0006950//response to stress;GO:0050896//response to stimulus;GO:0006952//defense response;GO:0007165//signal transduction;GO:0065007//biological regulation;GO:0044763//single-organism cellula…	-	-	-	-
Aradu.A0M2I	16.0167	94.33	1.19333	6.44	2.43206	2.36636e-29	3.18039e-28	Aradu.A0M2I	Protein kinase family protein	-	GO:0004672//protein kinase activity;GO:0032549//ribonucleoside binding;GO:1901265//nucleoside phosphate binding;GO:0032555//purine ribonucleotide binding;GO:0005488//binding;GO:0001882//nucleoside binding;GO:0043168//anion binding;GO:0030554//adenyl nucleotide binding;GO:0097159//organic cyclic compound binding;GO:1901363//heterocyclic compound binding;GO:0005524//ATP binding;GO:0016301//kinase a…	GO:0006796//phosphate-containing compound metabolic process;GO:0016310//phosphorylation;GO:0009987//cellular process;GO:0043412//macromolecule modification;GO:0036211//protein modification process;GO:0006793//phosphorus metabolic process;GO:0044238//primary metabolic process;GO:0006464//cellular protein modification process;GO:0071704//organic substance metabolic process;GO:0006468//protein phosp…	-	-	-	-
Aradu.A0MU0	154.91	21.47	9.27333	1.19667	-2.95407	9.69564e-50	2.18195e-48	Aradu.A0MU0	Fatty acid/sphingolipid desaturase	-	GO:0097159//organic cyclic compound binding;GO:0046914//transition metal ion binding;GO:0005488//binding;GO:0043167//ion binding;GO:0005506//iron ion binding;GO:1901363//heterocyclic compound binding;GO:0046906//tetrapyrrole binding;GO:0020037//heme binding;GO:0043169//cation binding;GO:0046872//metal ion binding	GO:0044763//single-organism cellular process;GO:0044283//small molecule biosynthetic process;GO:0006633//fatty acid biosynthetic process;GO:0044711//single-organism biosynthetic process;GO:0019752//carboxylic acid metabolic process;GO:0006631//fatty acid metabolic process;GO:0009987//cellular process;GO:1901576//organic substance biosynthetic process;GO:0072330//monocarboxylic acid biosynthetic p…	-	-	-	-
Aradu.A0YGD	4.73	98.1567	0.38	7.17667	4.23924	7.27127e-46	1.51011e-44	Aradu.A0YGD	isoflavone reductase homolog 2	-	-	-	-	-	-	-
Aradu.A2QA1	158.9	1020.49	9.6	56.8933	2.56715	1.31986e-142	1.10464e-140	Aradu.A2QA1	Chitinase family protein	-	GO:0003824//catalytic activity;GO:0016798//hydrolase activity, acting on glycosyl bonds;GO:0016787//hydrolase activity;GO:0004553//hydrolase activity, hydrolyzing O-glycosyl compounds;GO:0004568//chitinase activity	GO:0071704//organic substance metabolic process;GO:0009057//macromolecule catabolic process;GO:0006032//chitin catabolic process;GO:0008152//metabolic process;GO:0009987//cellular process;GO:1901565//organonitrogen compound catabolic process;GO:1901564//organonitrogen compound metabolic process;GO:0046348//amino sugar catabolic process;GO:0071554//cell wall organization or biogenesis;GO:0006807//…	Metabolism	Carbohydrate metabolism	ko00520//Amino sugar and nucleotide sugar metabolism	K01183
Aradu.A3K6K	13.12	3.53667	0.383333	0.0933333	-2.03814	0.000399061	0.00119205	Aradu.A3K6K	Cytochrome P450 superfamily protein	-	GO:0043169//cation binding;GO:0020037//heme binding;GO:0005506//iron ion binding;GO:0046906//tetrapyrrole binding;GO:0005488//binding;GO:1901363//heterocyclic compound binding;GO:0097159//organic cyclic compound binding;GO:0043167//ion binding;GO:0046914//transition metal ion binding;GO:0046872//metal ion binding	GO:0044710//single-organism metabolic process;GO:0055114//oxidation-reduction process;GO:0044699//single-organism process;GO:0008152//metabolic process	-	-	-	-
Aradu.A599R	5082.9	798.873	285.62	41.0133	-2.79993	5.69792e-209	8.35162e-207	Aradu.A599R	FASCICLIN-like arabinogalactan 2	-	-	-	-	-	-	-
Aradu.A60ME	5.64	26.4133	0.15	0.62	2.04731	1.20502e-05	4.3923e-05	Aradu.A60ME	ATP-binding ABC transporter	GO:0016020//membrane	GO:0043167//ion binding;GO:0017111//nucleoside-triphosphatase activity;GO:0016462//pyrophosphatase activity;GO:0097367//carbohydrate derivative binding;GO:0016817//hydrolase activity, acting on acid anhydrides;GO:0032553//ribonucleotide binding;GO:0016818//hydrolase activity, acting on acid anhydrides, in phosphorus-containing anhydrides;GO:0035639//purine ribonucleoside triphosphate binding;GO:0…	-	-	-	-	-
Aradu.A68HE	100.877	22.8767	4.02	0.843333	-2.25302	7.70654e-33	1.14852e-31	Aradu.A68HE	Pentatricopeptide repeat (PPR) superfamily protein	-	GO:0005515//protein binding;GO:0005488//binding	-	-	-	-	-
Aradu.A6XGF	996.177	7379.55	46.2833	315.327	2.76828	9.25384e-229	1.59425e-226	Aradu.A6XGF	homogentisate phytyltransferase 1	GO:0044425//membrane part;GO:0016020//membrane;GO:0031224//intrinsic component of membrane;GO:0016021//integral component of membrane	GO:0016740//transferase activity;GO:0003824//catalytic activity;GO:0004659//prenyltransferase activity;GO:0016765//transferase activity, transferring alkyl or aryl (other than methyl) groups	-	Metabolism	Metabolism of cofactors and vitamins	ko00130//Ubiquinone and other terpenoid-quinone biosynthesis	K09833
Aradu.A6XWH	42.48	252.293	2.26333	12.4667	2.46155	4.52477e-54	1.10874e-52	Aradu.A6XWH	Phosphorylase superfamily protein	-	GO:0003824//catalytic activity	GO:0055086//nucleobase-containing small molecule metabolic process;GO:0046483//heterocycle metabolic process;GO:1901135//carbohydrate derivative metabolic process;GO:1901360//organic cyclic compound metabolic process;GO:0044710//single-organism metabolic process;GO:0044763//single-organism cellular process;GO:0044237//cellular metabolic process;GO:0009987//cellular process;GO:0071704//organic sub…	-	-	-	-
Aradu.A7MKH	152.303	1348.98	6.69333	54.03	3.01296	1.24108e-241	2.34761e-239	Aradu.A7MKH	Protein kinase superfamily protein	-	GO:0030554//adenyl nucleotide binding;GO:0017076//purine nucleotide binding;GO:0016740//transferase activity;GO:0032559//adenyl ribonucleotide binding;GO:0032549//ribonucleoside binding;GO:0043167//ion binding;GO:0003824//catalytic activity;GO:0005488//binding;GO:0032550//purine ribonucleoside binding;GO:0032555//purine ribonucleotide binding;GO:1901363//heterocyclic compound binding;GO:0036094//…	GO:0044267//cellular protein metabolic process;GO:0016310//phosphorylation;GO:0043170//macromolecule metabolic process;GO:0006468//protein phosphorylation;GO:0071704//organic substance metabolic process;GO:0036211//protein modification process;GO:0006793//phosphorus metabolic process;GO:0006464//cellular protein modification process;GO:0044237//cellular metabolic process;GO:0006796//phosphate-con…	-	-	-	-
Aradu.A7WR2	8.33333	1.33333	0.773333	0.113333	-2.77052	0.000365974	0.00109873	Aradu.A7WR2	CCT motif family protein	-	GO:0005515//protein binding;GO:0005488//binding	-	-	-	-	-
Aradu.A8QCT	1.33333	7.66667	0.653333	3.35	2.35827	0.00356416	0.00910114	Aradu.A8QCT	Unknown protein	-	-	-	-	-	-	-
Aradu.A8RS9	39.82	10.19	1.7	0.4	-2.08746	1.12582e-11	6.8982e-11	Aradu.A8RS9	Ankyrin repeat family protein	-	GO:0005515//protein binding;GO:0005488//binding	-	-	-	-	-
Aradu.A8RZ6	244.02	55.36	5.06	1.07667	-2.23257	2.80651e-34	4.34927e-33	Aradu.A8RZ6	Protein kinase superfamily protein	-	GO:0032555//purine ribonucleotide binding;GO:0016773//phosphotransferase activity, alcohol group as acceptor;GO:0043168//anion binding;GO:0032559//adenyl ribonucleotide binding;GO:0032549//ribonucleoside binding;GO:0000166//nucleotide binding;GO:0030554//adenyl nucleotide binding;GO:0001882//nucleoside binding;GO:0036094//small molecule binding;GO:0032553//ribonucleotide binding;GO:0001883//purin…	GO:0044238//primary metabolic process;GO:0044260//cellular macromolecule metabolic process;GO:0019538//protein metabolic process;GO:0006796//phosphate-containing compound metabolic process;GO:0044267//cellular protein metabolic process;GO:0036211//protein modification process;GO:0006464//cellular protein modification process;GO:0008152//metabolic process;GO:0006468//protein phosphorylation;GO:004…	-	-	-	-
Aradu.A90PK	99.27	778.83	2.19	15.76	2.84726	2.67551e-141	2.21277e-139	Aradu.A90PK	PREDICTED: protein transport protein Sec61 subunit alpha-like	GO:0016020//membrane	-	GO:0033036//macromolecule localization;GO:0006810//transport;GO:0051234//establishment of localization;GO:0051179//localization;GO:0071702//organic substance transport;GO:0045184//establishment of protein localization;GO:0015031//protein transport;GO:0008104//protein localization	Genetic Information Processing;Cellular Processes	Folding, sorting and degradation;Transport and catabolism	ko04141//Protein processing in endoplasmic reticulum;ko04145//Phagosome;ko03060//Protein export	K10956
Aradu.A9I6U	5.33333	27.3333	0.353333	1.63667	2.21166	7.05935e-10	3.81305e-09	Aradu.A9I6U	Calcium-dependent lipid-binding (CaLB domain) family protein	-	GO:0005515//protein binding;GO:0005488//binding	-	-	-	-	-
Aradu.A9ZSS	25.2667	3.86333	1.66	0.22	-2.91561	1.48099e-12	9.61192e-12	Aradu.A9ZSS	Protein of unknown function (DUF1262)	-	-	-	-	-	-	-
Aradu.AA39B	25.9367	6.68	0.316667	0.0733333	-2.11042	1.50128e-09	7.89127e-09	Aradu.AA39B	PREDICTED: RNA-directed DNA polymerase homolog	-	GO:0046872//metal ion binding;GO:0043167//ion binding;GO:0097159//organic cyclic compound binding;GO:0003824//catalytic activity;GO:0016772//transferase activity, transferring phosphorus-containing groups;GO:0046914//transition metal ion binding;GO:0016779//nucleotidyltransferase activity;GO:0008270//zinc ion binding;GO:0005488//binding;GO:0034061//DNA polymerase activity;GO:0003964//RNA-directed…	GO:0009059//macromolecule biosynthetic process;GO:0046483//heterocycle metabolic process;GO:0044260//cellular macromolecule metabolic process;GO:0090304//nucleic acid metabolic process;GO:0009987//cellular process;GO:0006278//RNA-dependent DNA replication;GO:0043170//macromolecule metabolic process;GO:0006139//nucleobase-containing compound metabolic process;GO:0006807//nitrogen compound metaboli…	-	-	-	-
Aradu.AAS86	371.02	1920.24	5.64333	26.72	2.2433	2.41727e-195	3.20724e-193	Aradu.AAS86	ABC transporter family pleiotropic drug resistance protein n	GO:0016020//membrane	GO:0001883//purine nucleoside binding;GO:0017111//nucleoside-triphosphatase activity;GO:0036094//small molecule binding;GO:0032550//purine ribonucleoside binding;GO:0043168//anion binding;GO:0097367//carbohydrate derivative binding;GO:0017076//purine nucleotide binding;GO:0000166//nucleotide binding;GO:0016887//ATPase activity;GO:0003824//catalytic activity;GO:0032555//purine ribonucleotide bindi…	-	-	-	-	-
Aradu.AAT7R	0.666667	7	0.0566667	0.496667	3.13171	0.000214134	0.000665165	Aradu.AAT7R	alpha carbonic anhydrase 7	-	-	-	Metabolism	Energy metabolism	ko00910//Nitrogen metabolism	K01674
Aradu.ABR4L	0.333333	212.953	0.01	5.22667	9.02975	7.26034e-147	6.35178e-145	Aradu.ABR4L	cysteine desulfurylase	-	GO:1901363//heterocyclic compound binding;GO:0043167//ion binding;GO:0030170//pyridoxal phosphate binding;GO:0048037//cofactor binding;GO:0097159//organic cyclic compound binding;GO:0005488//binding;GO:0043168//anion binding;GO:0003824//catalytic activity	GO:0008152//metabolic process	-	-	-	-
Aradu.AD6QD	31.3333	6	1.47333	0.266667	-2.46597	2.40563e-12	1.54024e-11	Aradu.AD6QD	tubulin alpha-4 chain	GO:0015630//microtubule cytoskeleton;GO:0005622//intracellular;GO:0005874//microtubule;GO:0043234//protein complex;GO:0044424//intracellular part;GO:0043226//organelle;GO:0043232//intracellular non-membrane-bounded organelle;GO:0044464//cell part;GO:0032991//macromolecular complex;GO:0005856//cytoskeleton;GO:0044430//cytoskeletal part;GO:0043229//intracellular organelle;GO:0005623//cell;GO:004444…	GO:1901363//heterocyclic compound binding;GO:0019001//guanyl nucleotide binding;GO:0032561//guanyl ribonucleotide binding;GO:0000166//nucleotide binding;GO:0097159//organic cyclic compound binding;GO:0035639//purine ribonucleoside triphosphate binding;GO:0001882//nucleoside binding;GO:0005525//GTP binding;GO:0001883//purine nucleoside binding;GO:0032549//ribonucleoside binding;GO:0032553//ribonuc…	GO:0006461//protein complex assembly;GO:0070271//protein complex biogenesis;GO:0071822//protein complex subunit organization;GO:0044699//single-organism process;GO:0022607//cellular component assembly;GO:0065003//macromolecular complex assembly;GO:0071840//cellular component organization or biogenesis;GO:0044085//cellular component biogenesis;GO:0044763//single-organism cellular process;GO:003462…	Cellular Processes	Transport and catabolism	ko04145//Phagosome	K07374
Aradu.ADJ2V	0.333333	5.33333	0.0166667	0.273333	4.03562	0.000413698	0.00123262	Aradu.ADJ2V	Unknown protein	-	-	-	-	-	-	-
Aradu.AE3JB	1518.33	267.667	103.407	16.92	-2.61153	1.75387e-127	1.24779e-125	Aradu.AE3JB	Protein kinase superfamily protein	-	-	-	-	-	-	-
Aradu.AE6VJ	144.847	30.2833	6.37333	1.23	-2.37339	1.08009e-37	1.82705e-36	Aradu.AE6VJ	Eukaryotic aspartyl protease family protein	-	GO:0004175//endopeptidase activity;GO:0004190//aspartic-type endopeptidase activity;GO:0016787//hydrolase activity;GO:0008233//peptidase activity;GO:0070011//peptidase activity, acting on L-amino acid peptides;GO:0003824//catalytic activity;GO:0070001//aspartic-type peptidase activity	GO:0044238//primary metabolic process;GO:0006508//proteolysis;GO:0008152//metabolic process;GO:0071704//organic substance metabolic process;GO:0043170//macromolecule metabolic process;GO:0019538//protein metabolic process	-	-	-	-
Aradu.AF9FZ	0.333333	5	0.02	0.286667	3.8413	0.00159221	0.00433059	Aradu.AF9FZ	NAC domain protein,	-	GO:0097159//organic cyclic compound binding;GO:0005488//binding;GO:1901363//heterocyclic compound binding;GO:0003676//nucleic acid binding;GO:0003677//DNA binding	-	-	-	-	-
Aradu.AFE12	18	4.33333	6.45667	1.39333	-2.21225	3.91019e-07	1.66656e-06	Aradu.AFE12	Unknown protein	-	-	-	-	-	-	-
Aradu.AGS84	57.39	15.5667	2.55333	0.613333	-2.05764	4.80914e-15	3.61726e-14	Aradu.AGS84	endonuclease/exonuclease/phosphatase family protein	GO:0044464//cell part;GO:0005622//intracellular;GO:0005623//cell	GO:0004519//endonuclease activity;GO:0003677//DNA binding;GO:0003824//catalytic activity;GO:1901363//heterocyclic compound binding;GO:0016787//hydrolase activity;GO:0004518//nuclease activity;GO:0005488//binding;GO:0097159//organic cyclic compound binding;GO:0003676//nucleic acid binding;GO:0016788//hydrolase activity, acting on ester bonds	GO:0046483//heterocycle metabolic process;GO:0044238//primary metabolic process;GO:0090304//nucleic acid metabolic process;GO:0034641//cellular nitrogen compound metabolic process;GO:0050896//response to stimulus;GO:0006725//cellular aromatic compound metabolic process;GO:0044699//single-organism process;GO:0009987//cellular process;GO:0044763//single-organism cellular process;GO:0008152//metabol…	-	-	-	-
Aradu.AHX86	76.9433	8.86333	1.58667	0.17	-3.22239	1.20166e-24	1.37506e-23	Aradu.AHX86	ATP binding/protein serine/threonine kinase	-	GO:0032549//ribonucleoside binding;GO:0004672//protein kinase activity;GO:0043167//ion binding;GO:0032553//ribonucleotide binding;GO:0016772//transferase activity, transferring phosphorus-containing groups;GO:0005524//ATP binding;GO:0016740//transferase activity;GO:0097159//organic cyclic compound binding;GO:0032555//purine ribonucleotide binding;GO:0017076//purine nucleotide binding;GO:0032559//…	GO:0071704//organic substance metabolic process;GO:0006796//phosphate-containing compound metabolic process;GO:0008152//metabolic process;GO:0006464//cellular protein modification process;GO:0043170//macromolecule metabolic process;GO:0019538//protein metabolic process;GO:0043412//macromolecule modification;GO:0044267//cellular protein metabolic process;GO:0036211//protein modification process;GO…	-	-	-	-
Aradu.AIC9K	3.25	30.2067	0.156667	1.36333	3.12137	5.54079e-10	3.01814e-09	Aradu.AIC9K	Cytochrome P450 superfamily protein	-	GO:0046872//metal ion binding;GO:0043169//cation binding;GO:0020037//heme binding;GO:0046914//transition metal ion binding;GO:1901363//heterocyclic compound binding;GO:0043167//ion binding;GO:0005488//binding;GO:0005506//iron ion binding;GO:0046906//tetrapyrrole binding;GO:0097159//organic cyclic compound binding	GO:0044710//single-organism metabolic process;GO:0008152//metabolic process;GO:0055114//oxidation-reduction process;GO:0044699//single-organism process	-	-	-	-
Aradu.AK4C6	297.203	7041.88	13.25	286.91	4.43653	0	0	Aradu.AK4C6	Transmembrane amino acid transporter family protein	-	-	-	-	-	-	-
Aradu.AKG36	215.813	957.067	8.02333	32.4867	2.01757	8.26665e-105	4.50251e-103	Aradu.AKG36	PREDICTED: probable inactive poly [ADP-ribose] polymerase SRO5-like isoform X3	-	GO:0003950//NAD+ ADP-ribosyltransferase activity;GO:0003824//catalytic activity;GO:0016763//transferase activity, transferring pentosyl groups;GO:0016740//transferase activity;GO:0016757//transferase activity, transferring glycosyl groups	-	-	-	-	-
Aradu.ALM1L	0	39.8433	0.001	1.15667	10.1758	5.23068e-25	6.06233e-24	Aradu.ALM1L	Core-2/I-branching beta-1,6-N-acetylglucosaminyltransferase family protein	GO:0016020//membrane	GO:0016758//transferase activity, transferring hexosyl groups;GO:0016740//transferase activity;GO:0008194//UDP-glycosyltransferase activity;GO:0003824//catalytic activity;GO:0008375//acetylglucosaminyltransferase activity;GO:0016757//transferase activity, transferring glycosyl groups	-	-	-	-	-
Aradu.AM0MT	26.0933	5.93	0.333333	0.07	-2.25154	9.64138e-09	4.76882e-08	Aradu.AM0MT	Disease resistance protein (TIR-NBS-LRR class) family	-	GO:0016462//pyrophosphatase activity;GO:1901363//heterocyclic compound binding;GO:0001883//purine nucleoside binding;GO:0032549//ribonucleoside binding;GO:0043531//ADP binding;GO:0003824//catalytic activity;GO:0016817//hydrolase activity, acting on acid anhydrides;GO:0000166//nucleotide binding;GO:0097159//organic cyclic compound binding;GO:0005515//protein binding;GO:0017076//purine nucleotide b…	GO:0006950//response to stress;GO:0044699//single-organism process;GO:0065007//biological regulation;GO:0044700//single organism signaling;GO:0023052//signaling;GO:0050794//regulation of cellular process;GO:0050896//response to stimulus;GO:0006952//defense response;GO:0044763//single-organism cellular process;GO:0007165//signal transduction;GO:0009987//cellular process;GO:0007154//cell communicat…	-	-	-	-
Aradu.AR630	14.8367	178.79	0.403333	4.46667	3.46915	2.76662e-81	1.0932e-79	Aradu.AR630	Galactosyltransferase family protein	GO:0016020//membrane	GO:0008378//galactosyltransferase activity;GO:0030246//carbohydrate binding;GO:0005488//binding;GO:0003824//catalytic activity;GO:0016740//transferase activity;GO:0016757//transferase activity, transferring glycosyl groups;GO:0016758//transferase activity, transferring hexosyl groups	GO:0044710//single-organism metabolic process;GO:0034645//cellular macromolecule biosynthetic process;GO:0009101//glycoprotein biosynthetic process;GO:0019538//protein metabolic process;GO:0043170//macromolecule metabolic process;GO:0044267//cellular protein metabolic process;GO:0036211//protein modification process;GO:0043412//macromolecule modification;GO:0008152//metabolic process;GO:0009100//…	-	-	-	-
Aradu.AS232	2.2	21.2533	0.0533333	0.47	3.13955	8.47366e-11	4.88719e-10	Aradu.AS232	lipoxygenase 3	-	GO:0003824//catalytic activity;GO:0016491//oxidoreductase activity;GO:0046872//metal ion binding;GO:0016701//oxidoreductase activity, acting on single donors with incorporation of molecular oxygen;GO:0005515//protein binding;GO:0016165//linoleate 13S-lipoxygenase activity;GO:0046914//transition metal ion binding;GO:0043167//ion binding;GO:0016702//oxidoreductase activity, acting on single donors …	GO:0008152//metabolic process;GO:0044710//single-organism metabolic process;GO:0055114//oxidation-reduction process;GO:0044699//single-organism process	Metabolism	Lipid metabolism	ko00592//alpha-Linolenic acid metabolism;ko00591//Linoleic acid metabolism	K00454
Aradu.AT03S	0.666667	5.18667	0.02	0.163333	3.02975	0.00347862	0.0089014	Aradu.AT03S	Pyridoxal phosphate (PLP)-dependent transferases superfamily protein n	-	GO:0016831//carboxy-lyase activity;GO:0048037//cofactor binding;GO:0003824//catalytic activity;GO:1901363//heterocyclic compound binding;GO:0097159//organic cyclic compound binding;GO:0030170//pyridoxal phosphate binding;GO:0016830//carbon-carbon lyase activity;GO:0005488//binding;GO:0016829//lyase activity;GO:0043168//anion binding;GO:0043167//ion binding	GO:0044237//cellular metabolic process;GO:0044699//single-organism process;GO:0044281//small molecule metabolic process;GO:0071704//organic substance metabolic process;GO:0044763//single-organism cellular process;GO:0044710//single-organism metabolic process;GO:0043436//oxoacid metabolic process;GO:0008152//metabolic process;GO:0006082//organic acid metabolic process;GO:0009987//cellular process;…	Metabolism	Amino acid metabolism	ko00340//Histidine metabolism	K01590
Aradu.AT1JC	8.52	1.57	0.993333	0.17	-2.54674	0.000469187	0.00138512	Aradu.AT1JC	allene oxide synthase	-	GO:0020037//heme binding;GO:0097159//organic cyclic compound binding;GO:0046914//transition metal ion binding;GO:0005488//binding;GO:0043169//cation binding;GO:0046906//tetrapyrrole binding;GO:0043167//ion binding;GO:0046872//metal ion binding;GO:0005506//iron ion binding;GO:1901363//heterocyclic compound binding	GO:0008152//metabolic process;GO:0055114//oxidation-reduction process;GO:0044710//single-organism metabolic process;GO:0044699//single-organism process	Metabolism	Lipid metabolism	ko00592//alpha-Linolenic acid metabolism	K10528
Aradu.AU9I9	19.9833	3.66667	4.13667	0.626667	-2.7227	2.77919e-08	1.32109e-07	Aradu.AU9I9	Unknown protein	-	-	-	-	-	-	-
Aradu.AVH2T	111.38	2008.97	0.75	12.3067	4.03641	2.54843e-305	7.31739e-303	Aradu.AVH2T	ATP-binding ABC transporter	GO:0016020//membrane;GO:0016021//integral component of membrane;GO:0031224//intrinsic component of membrane;GO:0044425//membrane part	GO:0005488//binding;GO:0032555//purine ribonucleotide binding;GO:0097159//organic cyclic compound binding;GO:0016787//hydrolase activity;GO:0003824//catalytic activity;GO:0030554//adenyl nucleotide binding;GO:0016818//hydrolase activity, acting on acid anhydrides, in phosphorus-containing anhydrides;GO:0017076//purine nucleotide binding;GO:0032549//ribonucleoside binding;GO:0017111//nucleoside-tr…	GO:0009987//cellular process;GO:0051179//localization;GO:1902578//single-organism localization;GO:0055085//transmembrane transport;GO:0044699//single-organism process;GO:0044765//single-organism transport;GO:0044763//single-organism cellular process;GO:0051234//establishment of localization;GO:0006810//transport	-	-	-	-
Aradu.AW4VB	1747.93	444.683	205.433	47.65	-2.10812	1.37901e-159	1.35937e-157	Aradu.AW4VB	hypothetical protein	-	-	-	-	-	-	-
Aradu.AW9GY	20	2	4.35667	0.443333	-3.29676	8.83404e-09	4.38188e-08	Aradu.AW9GY	Bifunctional inhibitor/lipid-transfer protein/seed storage 2S albumin superfamily protein	-	-	-	-	-	-	-
Aradu.B0N2H	69.7433	14.98	2.18667	0.416667	-2.39177	2.22549e-24	2.52395e-23	Aradu.B0N2H	polyketide cyclase/dehydrase and lipid transporter	-	-	-	-	-	-	-
Aradu.B17TN	90.0667	736.73	2.08333	15.7033	2.91411	4.18711e-185	5.09654e-183	Aradu.B17TN	receptor-like serine/threonine kinase 2	-	GO:0000166//nucleotide binding;GO:0032550//purine ribonucleoside binding;GO:1901265//nucleoside phosphate binding;GO:0030554//adenyl nucleotide binding;GO:0001882//nucleoside binding;GO:0016773//phosphotransferase activity, alcohol group as acceptor;GO:0003824//catalytic activity;GO:0001883//purine nucleoside binding;GO:0005488//binding;GO:0032549//ribonucleoside binding;GO:0004674//protein serin…	GO:0032501//multicellular organismal process;GO:0009875//pollen-pistil interaction;GO:0044237//cellular metabolic process;GO:0051704//multi-organism process;GO:0044699//single-organism process;GO:0044763//single-organism cellular process;GO:0043412//macromolecule modification;GO:0009856//pollination;GO:0006468//protein phosphorylation;GO:0071704//organic substance metabolic process;GO:0022414//re…	-	-	-	-
Aradu.B18E9	43.96	370.203	2.04667	15.7967	2.94827	1.21468e-122	8.07735e-121	Aradu.B18E9	Protein kinase superfamily protein	-	GO:0030554//adenyl nucleotide binding;GO:0032550//purine ribonucleoside binding;GO:0005524//ATP binding;GO:0032549//ribonucleoside binding;GO:0016740//transferase activity;GO:0032555//purine ribonucleotide binding;GO:0016301//kinase activity;GO:0017076//purine nucleotide binding;GO:0043167//ion binding;GO:0003824//catalytic activity;GO:0001882//nucleoside binding;GO:0016772//transferase activity,…	GO:0006796//phosphate-containing compound metabolic process;GO:0006468//protein phosphorylation;GO:0019538//protein metabolic process;GO:0043412//macromolecule modification;GO:0044237//cellular metabolic process;GO:0016310//phosphorylation;GO:0044238//primary metabolic process;GO:0006464//cellular protein modification process;GO:0043170//macromolecule metabolic process;GO:0044267//cellular protei…	-	-	-	-
Aradu.B1C6F	35.3333	664.81	4.03	69.2567	4.1031	7.96885e-211	1.18351e-208	Aradu.B1C6F	WRKY family transcription factor	-	GO:1901363//heterocyclic compound binding;GO:0097159//organic cyclic compound binding;GO:0005488//binding;GO:0043565//sequence-specific DNA binding;GO:0001071//nucleic acid binding transcription factor activity;GO:0003677//DNA binding;GO:0003700//sequence-specific DNA binding transcription factor activity;GO:0003676//nucleic acid binding	-	-	-	-	-
Aradu.B20QU	13.3333	65.3333	1.80667	8.01333	2.14907	7.04481e-12	4.38176e-11	Aradu.B20QU	Non-specific lipid-transfer protein, putative	-	GO:0008289//lipid binding;GO:0005488//binding	GO:1902578//single-organism localization;GO:0044765//single-organism transport;GO:0006810//transport;GO:0051234//establishment of localization;GO:0071702//organic substance transport;GO:0051179//localization;GO:0033036//macromolecule localization;GO:0006869//lipid transport;GO:0044699//single-organism process;GO:0010876//lipid localization	-	-	-	-
Aradu.B37KY	49.1333	236.75	1.78	7.87	2.14449	2.24534e-57	5.88847e-56	Aradu.B37KY	Protein kinase superfamily protein	-	GO:0005524//ATP binding;GO:0032559//adenyl ribonucleotide binding;GO:0000166//nucleotide binding;GO:0097159//organic cyclic compound binding;GO:0035639//purine ribonucleoside triphosphate binding;GO:0043168//anion binding;GO:0032549//ribonucleoside binding;GO:0032555//purine ribonucleotide binding;GO:1901363//heterocyclic compound binding;GO:0032553//ribonucleotide binding;GO:0001882//nucleoside …	GO:0009987//cellular process;GO:0043412//macromolecule modification;GO:0044237//cellular metabolic process;GO:0006468//protein phosphorylation;GO:0044267//cellular protein metabolic process;GO:0036211//protein modification process;GO:0006796//phosphate-containing compound metabolic process;GO:0006793//phosphorus metabolic process;GO:0019538//protein metabolic process;GO:0043170//macromolecule met…	Organismal Systems	Environmental adaptation	ko04626//Plant-pathogen interaction	K04368
Aradu.B52JH	11.8933	3.30333	8.56667	2.02	-2.08438	0.000286232	0.000873327	Aradu.B52JH	Unknown protein	-	-	-	-	-	-	-
Aradu.B5E3M	807.807	144.967	26.24	4.27333	-2.61833	7.09089e-130	5.16961e-128	Aradu.B5E3M	Major facilitator superfamily protein	GO:0016021//integral component of membrane;GO:0016020//membrane;GO:0044425//membrane part;GO:0031224//intrinsic component of membrane	-	GO:0044765//single-organism transport;GO:0051234//establishment of localization;GO:0044763//single-organism cellular process;GO:0006810//transport;GO:0051179//localization;GO:0055085//transmembrane transport;GO:0009987//cellular process;GO:1902578//single-organism localization;GO:0044699//single-organism process	-	-	-	-
Aradu.B63QG	8.33	113.12	0.533333	6.54667	3.61765	3.36734e-43	6.57395e-42	Aradu.B63QG	NADP-dependent alkenal double bond reductase	-	GO:0003824//catalytic activity;GO:0046914//transition metal ion binding;GO:0043169//cation binding;GO:0046872//metal ion binding;GO:0043167//ion binding;GO:0005488//binding;GO:0016491//oxidoreductase activity;GO:0008270//zinc ion binding	GO:0044710//single-organism metabolic process;GO:0008152//metabolic process;GO:0055114//oxidation-reduction process;GO:0044699//single-organism process	-	-	-	-
Aradu.B6WMN	177.217	45.32	46.4467	10.8133	-2.10276	6.27143e-31	8.87175e-30	Aradu.B6WMN	S-norcoclaurine synthase-like protein	-	-	GO:0050896//response to stimulus;GO:0006952//defense response;GO:0009607//response to biotic stimulus;GO:0006950//response to stress	-	-	-	-
Aradu.B6WSD	10.3467	2.66667	0.376667	0.0866667	-2.11974	0.000146575	0.000465562	Aradu.B6WSD	PREDICTED: trihelix transcription factor GT-2-like	-	GO:0005488//binding;GO:0003682//chromatin binding;GO:0044877//macromolecular complex binding	-	-	-	-	-
Aradu.B78C7	506.647	119.22	66.6333	14.2167	-2.22866	2.32023e-83	9.46879e-82	Aradu.B78C7	plasma-membrane associated cation-binding protein 1	GO:0005623//cell;GO:0044464//cell part;GO:0031224//intrinsic component of membrane;GO:0016020//membrane;GO:0046658//anchored component of plasma membrane;GO:0005886//plasma membrane;GO:0071944//cell periphery;GO:0044459//plasma membrane part;GO:0031225//anchored component of membrane;GO:0044425//membrane part;GO:0031226//intrinsic component of plasma membrane	-	GO:0051716//cellular response to stimulus;GO:0050896//response to stimulus;GO:0009987//cellular process	-	-	-	-
Aradu.B7RDX	8.49	374.337	0.673333	27.0667	5.32905	2.20313e-193	2.88888e-191	Aradu.B7RDX	basic helix-loop-helix (bHLH) DNA-binding superfamily protein	-	GO:0046983//protein dimerization activity;GO:0005488//binding;GO:0005515//protein binding	-	-	-	-	-
Aradu.B7Z5E	162.4	4272.02	3.45667	83.8967	4.60116	0	0	Aradu.B7Z5E	4-hydroxy-3-methylbut-2-enyl diphosphate synthase	-	GO:0043169//cation binding;GO:0046429//4-hydroxy-3-methylbut-2-en-1-yl diphosphate synthase activity;GO:0005506//iron ion binding;GO:0052592//oxidoreductase activity, acting on CH or CH2 groups, with an iron-sulfur protein as acceptor;GO:0046914//transition metal ion binding;GO:0016491//oxidoreductase activity;GO:0043167//ion binding;GO:0005488//binding;GO:0016725//oxidoreductase activity, acting…	GO:0008152//metabolic process;GO:0044238//primary metabolic process;GO:0006720//isoprenoid metabolic process;GO:0008610//lipid biosynthetic process;GO:0044249//cellular biosynthetic process;GO:0044763//single-organism cellular process;GO:0009058//biosynthetic process;GO:0044711//single-organism biosynthetic process;GO:1901576//organic substance biosynthetic process;GO:0044255//cellular lipid meta…	Metabolism	Metabolism of terpenoids and polyketides	ko00900//Terpenoid backbone biosynthesis	K03526
Aradu.B80WC	581.91	3934.67	4.55	28.3067	2.6372	2.01728e-295	5.53674e-293	Aradu.B80WC	ABC transporter family protein (ATP-binding component)	GO:0044425//membrane part;GO:0031224//intrinsic component of membrane;GO:0016020//membrane;GO:0016021//integral component of membrane	GO:0043168//anion binding;GO:0097159//organic cyclic compound binding;GO:0032549//ribonucleoside binding;GO:0016887//ATPase activity;GO:0003824//catalytic activity;GO:0016462//pyrophosphatase activity;GO:0016787//hydrolase activity;GO:0032555//purine ribonucleotide binding;GO:0016818//hydrolase activity, acting on acid anhydrides, in phosphorus-containing anhydrides;GO:0035639//purine ribonucleos…	GO:0044763//single-organism cellular process;GO:0044699//single-organism process;GO:0006810//transport;GO:0055085//transmembrane transport;GO:1902578//single-organism localization;GO:0051234//establishment of localization;GO:0009987//cellular process;GO:0044765//single-organism transport;GO:0051179//localization	Environmental Information Processing	Membrane transport	ko02010//ABC transporters	K05658
Aradu.B8GCY	27.2867	170.693	1.60667	9.12667	2.50602	1.28402e-44	2.59449e-43	Aradu.B8GCY	S-adenosylmethionine decarboxylase	-	GO:0003824//catalytic activity;GO:0016831//carboxy-lyase activity;GO:0016830//carbon-carbon lyase activity;GO:0004014//adenosylmethionine decarboxylase activity;GO:0016829//lyase activity	GO:0071704//organic substance metabolic process;GO:0009058//biosynthetic process;GO:0034641//cellular nitrogen compound metabolic process;GO:0009309//amine biosynthetic process;GO:0006596//polyamine biosynthetic process;GO:0008152//metabolic process;GO:0044249//cellular biosynthetic process;GO:0008295//spermidine biosynthetic process;GO:0009308//amine metabolic process;GO:0042401//cellular biogen…	Metabolism	Amino acid metabolism	ko00270//Cysteine and methionine metabolism;ko00330//Arginine and proline metabolism	K01611
Aradu.B8LPK	8.66667	81.0233	0.386667	3.32667	3.10492	5.93784e-31	8.41472e-30	Aradu.B8LPK	Cytochrome P450 superfamily protein	-	GO:0043167//ion binding;GO:0005506//iron ion binding;GO:1901363//heterocyclic compound binding;GO:0097159//organic cyclic compound binding;GO:0046914//transition metal ion binding;GO:0020037//heme binding;GO:0046906//tetrapyrrole binding;GO:0043169//cation binding;GO:0005488//binding;GO:0046872//metal ion binding	GO:0008152//metabolic process;GO:0044699//single-organism process;GO:0055114//oxidation-reduction process;GO:0044710//single-organism metabolic process	-	-	-	-
Aradu.B90GQ	30.6633	479.29	9.51333	135.913	3.83659	1.0665e-125	7.41795e-124	Aradu.B90GQ	ethylene-responsive transcription factor 1B	-	GO:0003676//nucleic acid binding;GO:0003677//DNA binding;GO:0005488//binding;GO:0001071//nucleic acid binding transcription factor activity;GO:1901363//heterocyclic compound binding;GO:0003700//sequence-specific DNA binding transcription factor activity;GO:0097159//organic cyclic compound binding	-	-	-	-	-
Aradu.B9597	2.08333	73.8767	0.2	6.70667	5.06752	2.12879e-35	3.38328e-34	Aradu.B9597	Unknown protein	-	-	-	-	-	-	-
Aradu.B9UNN	4	32.66	0.166667	1.22667	2.87971	7.04293e-14	4.95652e-13	Aradu.B9UNN	receptor-like protein kinase 4	-	GO:0032550//purine ribonucleoside binding;GO:0003824//catalytic activity;GO:0043168//anion binding;GO:0001883//purine nucleoside binding;GO:0004672//protein kinase activity;GO:0043167//ion binding;GO:0032553//ribonucleotide binding;GO:0005524//ATP binding;GO:0016740//transferase activity;GO:0005488//binding;GO:0030554//adenyl nucleotide binding;GO:0097159//organic cyclic compound binding;GO:00973…	GO:0006793//phosphorus metabolic process;GO:0006796//phosphate-containing compound metabolic process;GO:0044267//cellular protein metabolic process;GO:0071704//organic substance metabolic process;GO:0016310//phosphorylation;GO:0044238//primary metabolic process;GO:0006464//cellular protein modification process;GO:0043412//macromolecule modification;GO:0043170//macromolecule metabolic process;GO:0…	-	-	-	-
Aradu.BB9DD	36.5533	6.13333	3.76667	0.566667	-2.73272	2.12487e-14	1.54311e-13	Aradu.BB9DD	LURP-one-like protein	-	-	-	-	-	-	-
Aradu.BDD78	671.847	144.613	46.5233	9.18	-2.34139	4.75492e-91	2.17511e-89	Aradu.BDD78	nitrate transporter 1.1	GO:0016020//membrane	GO:0005215//transporter activity	GO:0051179//localization;GO:0051234//establishment of localization;GO:0006810//transport	-	-	-	-
Aradu.BE1SW	0	7	0.001	0.18	7.49185	1.29873e-05	4.71578e-05	Aradu.BE1SW	PATATIN-like protein 4	-	-	GO:0006629//lipid metabolic process;GO:0044699//single-organism process;GO:0044238//primary metabolic process;GO:0008152//metabolic process;GO:0044710//single-organism metabolic process;GO:0071704//organic substance metabolic process	-	-	-	-
Aradu.BE92V	0.666667	11.48	0.03	0.493333	4.03953	6.66628e-07	2.78089e-06	Aradu.BE92V	transmembrane amino acid transporter family protein	-	-	-	-	-	-	-
Aradu.BF3MB	0.666667	10.6667	0.523333	7.93333	3.92213	7.23802e-07	3.00931e-06	Aradu.BF3MB	hypothetical protein	-	-	-	-	-	-	-
Aradu.BH653	19.3367	94.0167	1.70333	7.63	2.16332	6.64409e-18	5.76401e-17	Aradu.BH653	geranylgeranyl pyrophosphate synthase 1	-	-	GO:0009987//cellular process;GO:0006720//isoprenoid metabolic process;GO:0008299//isoprenoid biosynthetic process;GO:0044711//single-organism biosynthetic process;GO:0008610//lipid biosynthetic process;GO:0044763//single-organism cellular process;GO:0044699//single-organism process;GO:0006629//lipid metabolic process;GO:0009058//biosynthetic process;GO:0044710//single-organism metabolic process;G…	Metabolism	Metabolism of terpenoids and polyketides	ko00900//Terpenoid backbone biosynthesis	K13789
Aradu.BI4ZP	4.61333	0.466667	0.0633333	0.00666667	-3.24793	0.00135436	0.00372381	Aradu.BI4ZP	receptor-like serine/threonine kinase 2	-	GO:0001882//nucleoside binding;GO:0016772//transferase activity, transferring phosphorus-containing groups;GO:0032553//ribonucleotide binding;GO:0016301//kinase activity;GO:0017076//purine nucleotide binding;GO:0043167//ion binding;GO:0000166//nucleotide binding;GO:0043168//anion binding;GO:0032555//purine ribonucleotide binding;GO:1901265//nucleoside phosphate binding;GO:0097159//organic cyclic …	GO:0022414//reproductive process;GO:0044260//cellular macromolecule metabolic process;GO:0036211//protein modification process;GO:0044706//multi-multicellular organism process;GO:0044703//multi-organism reproductive process;GO:0043412//macromolecule modification;GO:0044237//cellular metabolic process;GO:0044699//single-organism process;GO:0044267//cellular protein metabolic process;GO:0009987//ce…	-	-	-	-
Aradu.BI7T6	1.33333	118.62	0.123333	10.0667	6.35088	2.57287e-61	7.26462e-60	Aradu.BI7T6	Dynein light chain type 1 family protein	GO:0005623//cell;GO:0043234//protein complex;GO:0044464//cell part;GO:0043226//organelle;GO:0005856//cytoskeleton;GO:0043229//intracellular organelle;GO:0044424//intracellular part;GO:0032991//macromolecular complex;GO:0044422//organelle part;GO:0044430//cytoskeletal part;GO:0005875//microtubule associated complex;GO:0044446//intracellular organelle part;GO:0043232//intracellular non-membrane-bou…	-	GO:0044763//single-organism cellular process;GO:0007017//microtubule-based process;GO:0009987//cellular process;GO:0044699//single-organism process	-	-	-	-
Aradu.BKR3K	8	249	1.70333	47.5167	4.802	1.49357e-104	8.07984e-103	Aradu.BKR3K	ABA/WDS induced protein	-	-	GO:0050896//response to stimulus;GO:0006950//response to stress	-	-	-	-
Aradu.BMJ7K	69	525.667	7.47	52.66	2.81753	6.4873e-128	4.63895e-126	Aradu.BMJ7K	Bowman birk trypsin inhibitor	GO:0005576//extracellular region	GO:0004867//serine-type endopeptidase inhibitor activity;GO:0061134//peptidase regulator activity;GO:0030234//enzyme regulator activity;GO:0030414//peptidase inhibitor activity;GO:0098772//molecular function regulator;GO:0004866//endopeptidase inhibitor activity;GO:0061135//endopeptidase regulator activity;GO:0004857//enzyme inhibitor activity	-	-	-	-	-
Aradu.BMJ8R	420.923	114.123	11.5033	2.85333	-2.01133	1.16577e-85	4.93367e-84	Aradu.BMJ8R	PREDICTED: ankyrin repeat-containing protein At3g12360-like	-	GO:0005515//protein binding;GO:0005488//binding	-	-	-	-	-
Aradu.BP2K6	5.09667	0.333333	1.88667	0.126667	-3.89673	0.00056669	0.00165396	Aradu.BP2K6	receptor-like protein kinase 1	-	GO:0004672//protein kinase activity;GO:0016740//transferase activity;GO:0003824//catalytic activity;GO:0016301//kinase activity;GO:0016773//phosphotransferase activity, alcohol group as acceptor;GO:0016772//transferase activity, transferring phosphorus-containing groups	GO:0036211//protein modification process;GO:0043170//macromolecule metabolic process;GO:0016310//phosphorylation;GO:0006468//protein phosphorylation;GO:0009987//cellular process;GO:0044267//cellular protein metabolic process;GO:0006796//phosphate-containing compound metabolic process;GO:0043412//macromolecule modification;GO:0044237//cellular metabolic process;GO:0044260//cellular macromolecule m…	-	-	-	-
Aradu.BP38Y	30.4867	151.027	1.04667	4.78333	2.19221	6.25751e-37	1.03474e-35	Aradu.BP38Y	beta glucosidase 11	-	-	GO:0071704//organic substance metabolic process;GO:0008152//metabolic process;GO:0044238//primary metabolic process;GO:0005975//carbohydrate metabolic process	Metabolism	Biosynthesis of other secondary metabolites;Carbohydrate metabolism;Metabolism of other amino acids	ko00500//Starch and sucrose metabolism;ko00940//Phenylpropanoid biosynthesis;ko00460//Cyanoamino acid metabolism	K01188
Aradu.BPN9K	7.30667	1.33333	1.33333	0.21	-2.66658	0.000157701	0.000498945	Aradu.BPN9K	short-chain dehydrogenase-reductase	-	GO:0003824//catalytic activity;GO:0016491//oxidoreductase activity	GO:0008152//metabolic process	-	-	-	-
Aradu.BR8Z1	0.683333	6.30333	0.06	0.506667	3.078	0.000764812	0.00218806	Aradu.BR8Z1	DNA repair protein RadA-like protein n	-	-	-	-	-	-	-
Aradu.BS3D3	1	18.8667	0.0366667	0.66	4.16993	8.79394e-11	5.06722e-10	Aradu.BS3D3	MACPF domain protein	-	-	-	-	-	-	-
Aradu.BV2Q9	172.667	903.477	29.76	145.737	2.29192	8.23021e-63	2.39635e-61	Aradu.BV2Q9	early nodulin-related	-	-	-	-	-	-	-
Aradu.BW310	20.4433	4.89333	1.96667	0.426667	-2.20457	3.29681e-07	1.41526e-06	Aradu.BW310	PREDICTED: EPIDERMAL PATTERNING FACTOR-like protein 1-like	-	-	-	-	-	-	-
Aradu.BWM82	0	38.04	0.001	1.55333	10.6012	7.55168e-29	1.0003e-27	Aradu.BWM82	Pyridoxal phosphate (PLP)-dependent transferases superfamily protein n	-	GO:0097159//organic cyclic compound binding;GO:0003824//catalytic activity;GO:0005488//binding;GO:0016831//carboxy-lyase activity;GO:1901363//heterocyclic compound binding;GO:0016830//carbon-carbon lyase activity;GO:0016829//lyase activity;GO:0030170//pyridoxal phosphate binding;GO:0043167//ion binding;GO:0043168//anion binding;GO:0048037//cofactor binding	GO:0044710//single-organism metabolic process;GO:0019752//carboxylic acid metabolic process;GO:0044763//single-organism cellular process;GO:0044237//cellular metabolic process;GO:0006082//organic acid metabolic process;GO:0044281//small molecule metabolic process;GO:0008152//metabolic process;GO:0009987//cellular process;GO:0071704//organic substance metabolic process;GO:0043436//oxoacid metaboli…	Metabolism	Amino acid metabolism	ko00340//Histidine metabolism	K01590
Aradu.BXL7K	29.3333	789.493	6.55667	162.267	4.62926	4.23847e-234	7.65536e-232	Aradu.BXL7K	cysteine-rich TM module stress tolerance protein	-	-	-	-	-	-	-
Aradu.BYT1F	1.34	44.89	0.05	1.63667	5.03269	1.16958e-24	1.33918e-23	Aradu.BYT1F	Cytochrome P450 superfamily protein	-	GO:0005488//binding;GO:0097159//organic cyclic compound binding;GO:0043167//ion binding;GO:0046872//metal ion binding;GO:0005506//iron ion binding;GO:0046914//transition metal ion binding;GO:0043169//cation binding;GO:0020037//heme binding;GO:1901363//heterocyclic compound binding;GO:0046906//tetrapyrrole binding	GO:0044699//single-organism process;GO:0044710//single-organism metabolic process;GO:0055114//oxidation-reduction process;GO:0008152//metabolic process	Metabolism	Biosynthesis of other secondary metabolites	ko00943//Isoflavonoid biosynthesis	K13260
Aradu.C014T	127.407	677.163	11.4833	56.09	2.2882	1.21747e-94	5.84127e-93	Aradu.C014T	Lipid transfer protein	-	GO:0005488//binding;GO:0008289//lipid binding	GO:0006810//transport;GO:0051179//localization;GO:0051234//establishment of localization;GO:0044699//single-organism process;GO:1902578//single-organism localization;GO:0071702//organic substance transport;GO:0010876//lipid localization;GO:0044765//single-organism transport;GO:0006869//lipid transport;GO:0033036//macromolecule localization	-	-	-	-
Aradu.C014Z	6.66667	97.3333	0.27	3.62	3.74496	5.12305e-32	7.4602e-31	Aradu.C014Z	PREDICTED: protein FAR1-RELATED SEQUENCE 5-like	-	GO:0008270//zinc ion binding;GO:0003676//nucleic acid binding;GO:1901363//heterocyclic compound binding;GO:0043167//ion binding;GO:0043169//cation binding;GO:0046914//transition metal ion binding;GO:0046872//metal ion binding;GO:0097159//organic cyclic compound binding;GO:0005488//binding	-	-	-	-	-
Aradu.C0153	3456.89	521.257	95.0767	13.05	-2.86504	3.21156e-214	4.98112e-212	Aradu.C0153	HXXXD-type acyl-transferase family protein	-	-	-	-	-	-	-
Aradu.C04VQ	49.67	305.18	3.10667	17.3633	2.4826	1.63037e-78	6.17215e-77	Aradu.C04VQ	catalytic LigB subunit of aromatic ring-opening dioxygenase family	-	GO:0008270//zinc ion binding;GO:0005506//iron ion binding;GO:0005488//binding;GO:0003824//catalytic activity;GO:0046914//transition metal ion binding;GO:0043167//ion binding;GO:0043169//cation binding;GO:0046872//metal ion binding;GO:0016491//oxidoreductase activity;GO:0008198//ferrous iron binding	GO:0044237//cellular metabolic process;GO:0044710//single-organism metabolic process;GO:0044699//single-organism process;GO:0008152//metabolic process;GO:0006725//cellular aromatic compound metabolic process;GO:0009987//cellular process;GO:0055114//oxidation-reduction process	-	-	-	-
Aradu.C0GKW	4.07333	0	0.206667	0.001	-7.69116	0.00315708	0.00815352	Aradu.C0GKW	UDP-Glycosyltransferase superfamily protein	-	-	GO:0008152//metabolic process	-	-	-	-
Aradu.C0K46	5.66667	1.33333	1.94	0.38	-2.35199	0.00214848	0.005718	Aradu.C0K46	unknown protein	-	-	-	-	-	-	-
Aradu.C0NTR	39.2767	6.25333	1.77333	0.263333	-2.7515	1.29905e-15	1.00672e-14	Aradu.C0NTR	C2H2-like zinc finger protein	-	GO:0003824//catalytic activity;GO:0016757//transferase activity, transferring glycosyl groups;GO:0016763//transferase activity, transferring pentosyl groups;GO:0016740//transferase activity;GO:0003950//NAD+ ADP-ribosyltransferase activity	-	-	-	-	-
Aradu.C0Q6Q	932.717	220.773	47.2133	10.25	-2.20357	3.61352e-163	3.64548e-161	Aradu.C0Q6Q	nodulin MtN21 /EamA-like transporter family protein	-	-	-	-	-	-	-
Aradu.C19BK	1.33333	192.75	0.04	5.14667	7.00749	1.00087e-85	4.24867e-84	Aradu.C19BK	putative indole-3-acetic acid-amido synthetase GH3.9	-	-	-	Environmental Information Processing	Signal transduction	ko04075//Plant hormone signal transduction	K14487
Aradu.C1NT8	7.81	78.5333	0.11	0.983333	3.16018	9.77973e-31	1.37651e-29	Aradu.C1NT8	ATP-binding ABC transporter	GO:0016021//integral component of membrane;GO:0044425//membrane part;GO:0016020//membrane;GO:0031224//intrinsic component of membrane	GO:0016887//ATPase activity;GO:0016462//pyrophosphatase activity;GO:0032550//purine ribonucleoside binding;GO:0017111//nucleoside-triphosphatase activity;GO:0036094//small molecule binding;GO:0032559//adenyl ribonucleotide binding;GO:0035639//purine ribonucleoside triphosphate binding;GO:0032549//ribonucleoside binding;GO:0003824//catalytic activity;GO:0001883//purine nucleoside binding;GO:000552…	GO:0055085//transmembrane transport;GO:0044765//single-organism transport;GO:0051234//establishment of localization;GO:0044699//single-organism process;GO:0009987//cellular process;GO:1902578//single-organism localization;GO:0051179//localization;GO:0006810//transport;GO:0044763//single-organism cellular process	-	-	-	-
Aradu.C1QBJ	43.4967	6.66667	1.75667	0.243333	-2.85183	2.32247e-14	1.68268e-13	Aradu.C1QBJ	PREDICTED: myb family transcription factor APL-like isoform X1	-	GO:1901363//heterocyclic compound binding;GO:0005488//binding;GO:0003682//chromatin binding;GO:0097159//organic cyclic compound binding;GO:0003677//DNA binding;GO:0003676//nucleic acid binding;GO:0044877//macromolecular complex binding	-	-	-	-	-
Aradu.C1X9T	372.707	2012.83	9.22667	45.7967	2.31136	9.18575e-198	1.25444e-195	Aradu.C1X9T	EIN3-binding F box protein 1	-	GO:0005515//protein binding;GO:0005488//binding	-	Environmental Information Processing	Signal transduction	ko04075//Plant hormone signal transduction	K14515
Aradu.C2STD	34.9067	8.33333	6.54	1.45667	-2.16662	1.00762e-10	5.7811e-10	Aradu.C2STD	Heavy metal transport/detoxification superfamily protein, putative	-	GO:0046872//metal ion binding;GO:0043169//cation binding;GO:0005488//binding;GO:0043167//ion binding	GO:1902578//single-organism localization;GO:0051179//localization;GO:0044765//single-organism transport;GO:0006810//transport;GO:0006811//ion transport;GO:0051234//establishment of localization;GO:0030001//metal ion transport;GO:0006812//cation transport;GO:0044699//single-organism process	-	-	-	-
Aradu.C3FIF	3.33333	55	0.716667	10.5733	3.88298	2.74611e-28	3.56415e-27	Aradu.C3FIF	BON1-associated-like protein	-	GO:0005488//binding;GO:0005515//protein binding	-	-	-	-	-
Aradu.C4UQ4	39.6667	1.33333	2.51	0.08	-4.97154	3.10152e-30	4.29632e-29	Aradu.C4UQ4	PREDICTED: uncharacterized protein LOC100814865	-	-	-	-	-	-	-
Aradu.C6EHZ	938.253	141.93	24.26	3.40667	-2.83215	6.08835e-129	4.38729e-127	Aradu.C6EHZ	receptor-like kinase 1	-	GO:0032555//purine ribonucleotide binding;GO:0097159//organic cyclic compound binding;GO:0035639//purine ribonucleoside triphosphate binding;GO:1901265//nucleoside phosphate binding;GO:0016740//transferase activity;GO:0030554//adenyl nucleotide binding;GO:0036094//small molecule binding;GO:0097367//carbohydrate derivative binding;GO:0043168//anion binding;GO:0016773//phosphotransferase activity, …	GO:0006468//protein phosphorylation;GO:0043412//macromolecule modification;GO:0006796//phosphate-containing compound metabolic process;GO:0006793//phosphorus metabolic process;GO:0036211//protein modification process;GO:0016310//phosphorylation;GO:0008152//metabolic process;GO:0044260//cellular macromolecule metabolic process;GO:0009987//cellular process;GO:0044238//primary metabolic process;GO:0…	-	-	-	-
Aradu.C6P70	2.93667	13.33	0.226667	0.976667	2.10729	0.000156057	0.000494079	Aradu.C6P70	Pentapeptide repeat-containing protein	-	-	-	-	-	-	-
Aradu.C881Z	24.3033	159.17	1.47	8.79333	2.58059	3.49467e-53	8.40147e-52	Aradu.C881Z	NAD(P)-binding Rossmann-fold superfamily protein	-	GO:0003824//catalytic activity;GO:0016491//oxidoreductase activity	GO:0008152//metabolic process	Metabolism	Metabolism of terpenoids and polyketides	ko00902//Monoterpenoid biosynthesis	K15095
Aradu.C8Q2A	0	5	0.001	0.34	8.40939	0.000101521	0.000330308	Aradu.C8Q2A	Protein kinase superfamily protein	-	GO:0032550//purine ribonucleoside binding;GO:0003824//catalytic activity;GO:0035639//purine ribonucleoside triphosphate binding;GO:0097159//organic cyclic compound binding;GO:0005488//binding;GO:0043168//anion binding;GO:0016301//kinase activity;GO:0097367//carbohydrate derivative binding;GO:0004672//protein kinase activity;GO:0043167//ion binding;GO:0036094//small molecule binding;GO:0017076//pu…	GO:0006793//phosphorus metabolic process;GO:0044260//cellular macromolecule metabolic process;GO:0009987//cellular process;GO:0016310//phosphorylation;GO:0006796//phosphate-containing compound metabolic process;GO:0044238//primary metabolic process;GO:0044237//cellular metabolic process;GO:0043412//macromolecule modification;GO:0006468//protein phosphorylation;GO:0019538//protein metabolic proces…	-	-	-	-
Aradu.C924Y	87.9	10.46	9.99	1.1	-3.18298	1.87704e-42	3.598e-41	Aradu.C924Y	Gibberellin-regulated family protein	-	-	-	-	-	-	-
Aradu.C97AK	16.9967	219.537	1.03333	12.1433	3.55479	4.99243e-82	1.99238e-80	Aradu.C97AK	PREDICTED: protein IQ-DOMAIN 14-like	-	-	-	-	-	-	-
Aradu.C9WJ5	0	8.33333	0.001	1.31333	10.359	2.27922e-05	8.02212e-05	Aradu.C9WJ5	PREDICTED: expansin-like B1-like	-	-	-	-	-	-	-
Aradu.CAR17	3.99333	0	0.356667	0.001	-8.47843	0.0036747	0.00935867	Aradu.CAR17	NAD(P)H	GO:0016020//membrane	GO:0000166//nucleotide binding;GO:0036094//small molecule binding;GO:0048038//quinone binding;GO:0005488//binding;GO:1901265//nucleoside phosphate binding;GO:1901363//heterocyclic compound binding;GO:0050662//coenzyme binding;GO:0097159//organic cyclic compound binding;GO:0051287//NAD binding;GO:0048037//cofactor binding	GO:0008152//metabolic process;GO:0055114//oxidation-reduction process;GO:0044699//single-organism process;GO:0044710//single-organism metabolic process	Metabolism	Energy metabolism	ko00190//Oxidative phosphorylation	K05572
Aradu.CBB8Q	20.3333	4.66667	0.793333	0.17	-2.22239	9.74956e-07	3.99596e-06	Aradu.CBB8Q	RING/U-box superfamily protein	-	GO:0043169//cation binding;GO:0046872//metal ion binding;GO:0043167//ion binding;GO:0005488//binding;GO:0008270//zinc ion binding;GO:0046914//transition metal ion binding	-	-	-	-	-
Aradu.CC1R3	676.433	154.75	13.3567	2.88	-2.21342	1.49042e-47	3.20716e-46	Aradu.CC1R3	receptor-like protein kinase 2	-	GO:0032559//adenyl ribonucleotide binding;GO:0030554//adenyl nucleotide binding;GO:0097367//carbohydrate derivative binding;GO:0016301//kinase activity;GO:0032553//ribonucleotide binding;GO:0000166//nucleotide binding;GO:0043167//ion binding;GO:0097159//organic cyclic compound binding;GO:0016773//phosphotransferase activity, alcohol group as acceptor;GO:0004672//protein kinase activity;GO:0032555…	GO:0036211//protein modification process;GO:0043412//macromolecule modification;GO:0008152//metabolic process;GO:0071704//organic substance metabolic process;GO:0006468//protein phosphorylation;GO:0016310//phosphorylation;GO:0009987//cellular process;GO:0044238//primary metabolic process;GO:0044237//cellular metabolic process;GO:0019538//protein metabolic process;GO:0006793//phosphorus metabolic …	-	-	-	-
Aradu.CD2E5	117.02	11.1133	3.70667	0.32	-3.53398	8.52754e-57	2.21151e-55	Aradu.CD2E5	nitrate transporter 1:2	GO:0016020//membrane	GO:0005215//transporter activity	GO:0051179//localization;GO:0051234//establishment of localization;GO:0006810//transport	-	-	-	-
Aradu.CG1AI	10.5467	2.88333	0.47	0.113333	-2.05209	0.000617833	0.00179258	Aradu.CG1AI	transmembrane amino acid transporter family protein	-	-	-	-	-	-	-
Aradu.CGP4R	46.6233	212.587	1.54	6.52333	2.08268	4.67874e-41	8.63438e-40	Aradu.CGP4R	amino acid permease	GO:0016020//membrane	GO:0015075//ion transmembrane transporter activity;GO:0008509//anion transmembrane transporter activity;GO:0015171//amino acid transmembrane transporter activity;GO:0005215//transporter activity;GO:0022857//transmembrane transporter activity;GO:0022891//substrate-specific transmembrane transporter activity;GO:0008514//organic anion transmembrane transporter activity;GO:0022892//substrate-specific…	GO:0051179//localization;GO:0009987//cellular process;GO:1903825//organic acid transmembrane transport;GO:0006820//anion transport;GO:0006865//amino acid transport;GO:0044765//single-organism transport;GO:0015711//organic anion transport;GO:0071705//nitrogen compound transport;GO:0034220//ion transmembrane transport;GO:0006811//ion transport;GO:0055085//transmembrane transport;GO:0015849//organic…	-	-	-	-
Aradu.CH74S	267.557	40.6167	6.82667	0.946667	-2.85025	1.82985e-72	6.24726e-71	Aradu.CH74S	Cyclopropane-fatty-acyl-phospholipid synthase	-	GO:0003824//catalytic activity;GO:0016491//oxidoreductase activity	GO:0009058//biosynthetic process;GO:0044710//single-organism metabolic process;GO:0071704//organic substance metabolic process;GO:0044699//single-organism process;GO:0055114//oxidation-reduction process;GO:0008152//metabolic process;GO:0006629//lipid metabolic process;GO:0044711//single-organism biosynthetic process;GO:0008610//lipid biosynthetic process;GO:1901576//organic substance biosynthetic…	-	-	-	-
Aradu.CH837	104.977	22.2333	9.75333	1.90333	-2.35737	3.58666e-25	4.18028e-24	Aradu.CH837	CSL zinc finger domain-containing protein	-	-	-	-	-	-	-
Aradu.CHQ37	425.163	34188.2	49.9733	3686.86	6.20509	0	0	Aradu.CHQ37	disease-resistance response protein	-	-	GO:0006952//defense response;GO:0009607//response to biotic stimulus;GO:0006950//response to stress;GO:0050896//response to stimulus	-	-	-	-
Aradu.CI6AA	85.33	630.043	9.33333	63.4267	2.76463	1.67036e-122	1.10943e-120	Aradu.CI6AA	PREDICTED: blue copper protein-like	-	GO:0046872//metal ion binding;GO:0005488//binding;GO:0046914//transition metal ion binding;GO:0043167//ion binding;GO:0005507//copper ion binding;GO:0043169//cation binding;GO:0009055//electron carrier activity	-	-	-	-	-
Aradu.CJY86	4.42333	0.333333	0.19	0.01	-4.24793	0.00133865	0.00368424	Aradu.CJY86	Ulp1 protease family, carboxy-terminal domain protein	-	GO:0003824//catalytic activity;GO:0016787//hydrolase activity;GO:0008234//cysteine-type peptidase activity;GO:0008233//peptidase activity;GO:0070011//peptidase activity, acting on L-amino acid peptides	GO:0044238//primary metabolic process;GO:0008152//metabolic process;GO:0019538//protein metabolic process;GO:0071704//organic substance metabolic process;GO:0006508//proteolysis;GO:0043170//macromolecule metabolic process	Environmental Information Processing	Signal transduction	ko04075//Plant hormone signal transduction	K14484
Aradu.CK7PM	91.1833	18.9	4.58	0.86	-2.41294	2.74951e-20	2.65153e-19	Aradu.CK7PM	Endosomal targeting BRO1-like domain-containing protein	-	-	-	-	-	-	-
Aradu.CL8S6	937.577	237.63	42.85	9.96667	-2.10411	4.6087e-139	3.73438e-137	Aradu.CL8S6	Protein of unknown function (DUF506)	-	-	-	-	-	-	-
Aradu.CLQ9M	33.0367	252.503	0.986667	6.95333	2.81707	2.54651e-60	7.03411e-59	Aradu.CLQ9M	nitrate transporter 1.7	GO:0016020//membrane	GO:0005215//transporter activity	GO:0051234//establishment of localization;GO:0006810//transport;GO:0051179//localization	-	-	-	-
Aradu.CM0TB	47.3067	551.053	2.86667	30.55	3.41373	2.15979e-156	2.07425e-154	Aradu.CM0TB	Tyrosine phosphatase family protein	-	GO:0016791//phosphatase activity;GO:0004721//phosphoprotein phosphatase activity;GO:0016788//hydrolase activity, acting on ester bonds;GO:0003824//catalytic activity;GO:0004725//protein tyrosine phosphatase activity;GO:0016787//hydrolase activity;GO:0042578//phosphoric ester hydrolase activity	GO:0009987//cellular process;GO:0044237//cellular metabolic process;GO:0008152//metabolic process;GO:0006793//phosphorus metabolic process;GO:0016311//dephosphorylation;GO:0006796//phosphate-containing compound metabolic process	-	-	-	-
Aradu.CM6S6	24	561.56	1.73333	36.8467	4.40991	1.5043e-219	2.44846e-217	Aradu.CM6S6	myb transcription factor	-	GO:1901363//heterocyclic compound binding;GO:0003676//nucleic acid binding;GO:0097159//organic cyclic compound binding;GO:0044877//macromolecular complex binding;GO:0003677//DNA binding;GO:0005488//binding;GO:0003682//chromatin binding	-	-	-	-	-
Aradu.CMH1Z	19.18	4.09667	0.41	0.0766667	-2.41895	1.42732e-08	6.94989e-08	Aradu.CMH1Z	PREDICTED: WPP domain-associated protein-like	-	-	-	-	-	-	-
Aradu.CN3KR	299.643	2014.51	21.0667	129.643	2.62151	6.86808e-261	1.49631e-258	Aradu.CN3KR	PREDICTED: 1-aminocyclopropane-1-carboxylate oxidase homolog 1-like	-	GO:0003824//catalytic activity;GO:0016491//oxidoreductase activity	GO:0044699//single-organism process;GO:0008152//metabolic process;GO:0055114//oxidation-reduction process;GO:0044710//single-organism metabolic process	-	-	-	-
Aradu.CNF9F	101.15	930.487	12.3133	103.26	3.06799	6.68963e-188	8.32354e-186	Aradu.CNF9F	Glutathione S-transferase family protein	GO:0044424//intracellular part;GO:0044464//cell part;GO:0005737//cytoplasm;GO:0005623//cell;GO:0005622//intracellular	GO:0005515//protein binding;GO:0016740//transferase activity;GO:0005488//binding;GO:0016765//transferase activity, transferring alkyl or aryl (other than methyl) groups;GO:0003824//catalytic activity;GO:0004364//glutathione transferase activity	GO:0008152//metabolic process	Metabolism	Metabolism of other amino acids	ko00480//Glutathione metabolism	K00799
Aradu.CPK7I	25.6633	4.98333	3.35	0.583333	-2.52177	1.73104e-10	9.7734e-10	Aradu.CPK7I	Unknown protein	-	-	-	-	-	-	-
Aradu.CT448	85.7533	1715.79	7.38667	135.79	4.20031	0	0	Aradu.CT448	myb transcription factor	-	GO:0003677//DNA binding;GO:0097159//organic cyclic compound binding;GO:0005488//binding;GO:0003682//chromatin binding;GO:0003676//nucleic acid binding;GO:1901363//heterocyclic compound binding;GO:0044877//macromolecular complex binding	-	-	-	-	-
Aradu.CTP8M	498.867	51.3267	25.0933	2.40333	-3.3842	2.14797e-186	2.63744e-184	Aradu.CTP8M	xyloglucan endotransglucosylase/hydrolase 9	GO:0048046//apoplast;GO:0005618//cell wall;GO:0044464//cell part;GO:0030312//external encapsulating structure;GO:0005576//extracellular region;GO:0071944//cell periphery;GO:0005623//cell	GO:0016740//transferase activity;GO:0016762//xyloglucan:xyloglucosyl transferase activity;GO:0016758//transferase activity, transferring hexosyl groups;GO:0003824//catalytic activity;GO:0016757//transferase activity, transferring glycosyl groups	GO:0044262//cellular carbohydrate metabolic process;GO:0008152//metabolic process;GO:0043170//macromolecule metabolic process;GO:0005975//carbohydrate metabolic process;GO:0044264//cellular polysaccharide metabolic process;GO:0005976//polysaccharide metabolic process;GO:0044260//cellular macromolecule metabolic process;GO:0044238//primary metabolic process;GO:0044042//glucan metabolic process;GO:…	-	-	-	-
Aradu.CU1UG	164.99	792.543	7.33333	32.3233	2.14003	1.16816e-105	6.4695e-104	Aradu.CU1UG	pfkB-like carbohydrate kinase family protein	-	GO:0004747//ribokinase activity;GO:0016740//transferase activity;GO:0016772//transferase activity, transferring phosphorus-containing groups;GO:0019200//carbohydrate kinase activity;GO:0016301//kinase activity;GO:0003824//catalytic activity;GO:0016773//phosphotransferase activity, alcohol group as acceptor	GO:0005996//monosaccharide metabolic process;GO:0044723//single-organism carbohydrate metabolic process;GO:0044238//primary metabolic process;GO:0006014//D-ribose metabolic process;GO:0044699//single-organism process;GO:0044710//single-organism metabolic process;GO:0008152//metabolic process;GO:0005975//carbohydrate metabolic process;GO:0071704//organic substance metabolic process;GO:0019321//pen…	Metabolism	Carbohydrate metabolism	ko00500//Starch and sucrose metabolism;ko00520//Amino sugar and nucleotide sugar metabolism;ko00051//Fructose and mannose metabolism	K00847
Aradu.CY324	374.003	37.3333	48.5833	4.40333	-3.46379	2.80267e-151	2.54334e-149	Aradu.CY324	Heavy metal transport/detoxification superfamily protein	-	GO:0043169//cation binding;GO:0005488//binding;GO:0043167//ion binding;GO:0046872//metal ion binding	GO:0044765//single-organism transport;GO:0030001//metal ion transport;GO:0006811//ion transport;GO:0051179//localization;GO:0006812//cation transport;GO:0006810//transport;GO:0044699//single-organism process;GO:1902578//single-organism localization;GO:0051234//establishment of localization	-	-	-	-
Aradu.CY8HB	17.49	96.6667	0.613333	3.11667	2.34526	1.12622e-28	1.48511e-27	Aradu.CY8HB	calcium dependent protein kinase 1	-	GO:0005509//calcium ion binding;GO:0032555//purine ribonucleotide binding;GO:0043167//ion binding;GO:0032550//purine ribonucleoside binding;GO:0043168//anion binding;GO:0016773//phosphotransferase activity, alcohol group as acceptor;GO:1901265//nucleoside phosphate binding;GO:0001882//nucleoside binding;GO:0097367//carbohydrate derivative binding;GO:0043169//cation binding;GO:0017076//purine nucl…	GO:0044260//cellular macromolecule metabolic process;GO:0008152//metabolic process;GO:0009987//cellular process;GO:0036211//protein modification process;GO:0016310//phosphorylation;GO:0019538//protein metabolic process;GO:0071704//organic substance metabolic process;GO:0006468//protein phosphorylation;GO:0006464//cellular protein modification process;GO:0044238//primary metabolic process;GO:00431…	Organismal Systems	Environmental adaptation	ko04626//Plant-pathogen interaction	K13412
Aradu.CYG6N	41.6667	2.33333	22.7233	1.13	-4.32978	3.45523e-15	2.62214e-14	Aradu.CYG6N	Gibberellin-regulated family protein	-	-	-	-	-	-	-
Aradu.CZ128	0.333333	10.96	0.0133333	0.41	4.94251	5.48749e-08	2.53959e-07	Aradu.CZ128	alternative oxidase 2	-	GO:0016682//oxidoreductase activity, acting on diphenols and related substances as donors, oxygen as acceptor;GO:0009916//alternative oxidase activity;GO:0003824//catalytic activity;GO:0016679//oxidoreductase activity, acting on diphenols and related substances as donors;GO:0016491//oxidoreductase activity	GO:0055114//oxidation-reduction process;GO:0044699//single-organism process;GO:0008152//metabolic process;GO:0044710//single-organism metabolic process	-	-	-	-
Aradu.CZ5TY	151.757	35.1333	5.54	1.17333	-2.23927	1.503e-44	3.02932e-43	Aradu.CZ5TY	C2-H2 zinc finger protein	-	GO:0097159//organic cyclic compound binding;GO:0005488//binding;GO:1901363//heterocyclic compound binding;GO:0003676//nucleic acid binding	-	-	-	-	-
Aradu.CZ6VC	7.89	43.8767	0.686667	3.51667	2.35653	1.30792e-15	1.01331e-14	Aradu.CZ6VC	developmentally regulated GTP-binding protein	-	-	-	-	-	-	-
Aradu.D0FCJ	232	1891.4	31.4533	232.39	2.88526	3.03289e-136	2.39175e-134	Aradu.D0FCJ	cysteine-rich TM module stress tolerance protein	-	-	-	-	-	-	-
Aradu.D0JN5	21.9167	144.907	1.33667	8.22667	2.62167	3.38574e-40	6.09161e-39	Aradu.D0JN5	MYB transcription factor MYB48	-	GO:1901363//heterocyclic compound binding;GO:0044877//macromolecular complex binding;GO:0005488//binding;GO:0003677//DNA binding;GO:0003676//nucleic acid binding;GO:0003682//chromatin binding;GO:0097159//organic cyclic compound binding	-	-	-	-	-
Aradu.D12DR	1.55667	11.9933	0.0866667	0.646667	2.89947	6.4455e-06	2.42338e-05	Aradu.D12DR	Flavin-binding monooxygenase family protein	-	GO:0048037//cofactor binding;GO:0016491//oxidoreductase activity;GO:1901363//heterocyclic compound binding;GO:0043168//anion binding;GO:0050660//flavin adenine dinucleotide binding;GO:0000166//nucleotide binding;GO:0005488//binding;GO:1901265//nucleoside phosphate binding;GO:0043167//ion binding;GO:0050661//NADP binding;GO:0036094//small molecule binding;GO:0097159//organic cyclic compound bindin…	GO:0044710//single-organism metabolic process;GO:0044699//single-organism process;GO:0055114//oxidation-reduction process;GO:0008152//metabolic process	Metabolism	Amino acid metabolism	ko00380//Tryptophan metabolism	K11816
Aradu.D14Q2	146.667	5297.27	5.34	175.703	5.04016	0	0	Aradu.D14Q2	Pathogenesis-related thaumatin superfamily protein	-	-	-	-	-	-	-
Aradu.D1CF5	230.713	1333.16	11.0267	59.5133	2.43222	2.2094e-17	1.86783e-16	Aradu.D1CF5	homogentisate phytyltransferase 1	GO:0044425//membrane part;GO:0016020//membrane;GO:0031224//intrinsic component of membrane;GO:0016021//integral component of membrane	GO:0016765//transferase activity, transferring alkyl or aryl (other than methyl) groups;GO:0003824//catalytic activity;GO:0016740//transferase activity;GO:0004659//prenyltransferase activity	-	Metabolism	Metabolism of cofactors and vitamins	ko00130//Ubiquinone and other terpenoid-quinone biosynthesis	K09833
Aradu.D1CQS	4948.75	31781.8	328.967	1935.02	2.55634	5.75893e-201	8.0612e-199	Aradu.D1CQS	Glutathione S-transferase family protein	-	GO:0005488//binding;GO:0005515//protein binding	-	Metabolism	Metabolism of other amino acids	ko00480//Glutathione metabolism	K00799
Aradu.D1GTJ	902.53	208.46	73.17	15.5967	-2.23001	1.84097e-52	4.35662e-51	Aradu.D1GTJ	hypothetical protein	-	-	-	-	-	-	-
Aradu.D1MWR	5.24	38.7133	0.183333	1.22667	2.7422	3.60967e-15	2.73527e-14	Aradu.D1MWR	UDP-Glycosyltransferase superfamily protein	-	-	GO:0008152//metabolic process	-	-	-	-
Aradu.D1QW8	10.1667	346.523	0.463333	14.64	4.98172	2.56453e-164	2.59657e-162	Aradu.D1QW8	PREDICTED: gibberellin 20 oxidase 1-like	-	GO:0005506//iron ion binding;GO:0003824//catalytic activity;GO:0046914//transition metal ion binding;GO:0016491//oxidoreductase activity;GO:0043167//ion binding;GO:0043169//cation binding;GO:0046872//metal ion binding;GO:0005488//binding	GO:0055114//oxidation-reduction process;GO:0008152//metabolic process;GO:0044710//single-organism metabolic process;GO:0044699//single-organism process	Metabolism	Metabolism of terpenoids and polyketides	ko00904//Diterpenoid biosynthesis	K04125
Aradu.D1YQE	8.84667	46.8067	0.98	4.78	2.28616	2.06981e-14	1.50468e-13	Aradu.D1YQE	DNAJ-like 20	-	-	-	-	-	-	-
Aradu.D29PK	11.8	2.33333	1.00667	0.19	-2.40551	3.5328e-05	0.000121621	Aradu.D29PK	PREDICTED: transcription factor bHLH155-like	-	-	-	-	-	-	-
Aradu.D2K8N	12.3333	96	2.37667	17.0967	2.8467	4.13269e-24	4.63621e-23	Aradu.D2K8N	CAP (Cysteine-rich secretory proteins, Antigen 5, and Pathogenesis-related 1 protein) superfamily protein	-	-	-	Environmental Information Processing;Organismal Systems	Signal transduction;Environmental adaptation	ko04075//Plant hormone signal transduction;ko04626//Plant-pathogen interaction	K13449
Aradu.D2PDA	120.877	21.1133	6.48333	1.04	-2.64015	2.33527e-36	3.80321e-35	Aradu.D2PDA	aluminum-activated malate transporter 1	-	-	GO:0006811//ion transport;GO:0071702//organic substance transport;GO:0006835//dicarboxylic acid transport;GO:0044699//single-organism process;GO:0015849//organic acid transport;GO:0044765//single-organism transport;GO:0051179//localization;GO:0006820//anion transport;GO:0051234//establishment of localization;GO:0015743//malate transport;GO:0015740//C4-dicarboxylate transport;GO:0046942//carboxyli…	-	-	-	-
Aradu.D2V5A	0.333333	14	0.296667	11.6667	5.29741	4.52183e-10	2.47635e-09	Aradu.D2V5A	unknown protein; BEST Arabidopsis thaliana protein match is: unknown protein .	-	-	-	-	-	-	-
Aradu.D2VN6	6.58667	0	0.313333	0.001	-8.29155	2.55006e-05	8.92823e-05	Aradu.D2VN6	Cell wall protein Exp4 n	GO:0005576//extracellular region	-	GO:0009987//cellular process;GO:0045229//external encapsulating structure organization;GO:0071840//cellular component organization or biogenesis;GO:0071669//plant-type cell wall organization or biogenesis;GO:0016043//cellular component organization;GO:0071554//cell wall organization or biogenesis;GO:0009664//plant-type cell wall organization;GO:0071555//cell wall organization	-	-	-	-
Aradu.D2W96	55.8933	372.787	4.69667	28.3733	2.59483	2.1513e-76	7.86763e-75	Aradu.D2W96	nodulin MtN21 /EamA-like transporter family protein	GO:0016020//membrane	-	-	-	-	-	-
Aradu.D46RH	13.83	2.33333	1.07	0.16	-2.74147	1.70767e-07	7.53459e-07	Aradu.D46RH	Heavy metal transport/detoxification superfamily protein	-	GO:0043169//cation binding;GO:0005488//binding;GO:0043167//ion binding;GO:0046872//metal ion binding	GO:0006811//ion transport;GO:0044765//single-organism transport;GO:0051179//localization;GO:0051234//establishment of localization;GO:0044699//single-organism process;GO:0030001//metal ion transport;GO:0006810//transport;GO:1902578//single-organism localization;GO:0006812//cation transport	-	-	-	-
Aradu.D48TD	12.8133	1.18333	0.846667	0.0766667	-3.46512	2.21998e-08	1.06238e-07	Aradu.D48TD	splicing regulatory glutamine/lysine-rich protein 1-like	-	-	-	-	-	-	-
Aradu.D4TC3	0	23.0667	0.001	2.05667	11.0061	1.06845e-18	9.64432e-18	Aradu.D4TC3	PREDICTED: protein LURP-one-related 14-like	-	-	-	-	-	-	-
Aradu.D580V	2.90333	200.41	0.0933333	5.87667	5.97646	1.42893e-120	9.27083e-119	Aradu.D580V	peptide transporter 1	GO:0016020//membrane	GO:0005215//transporter activity	GO:0051234//establishment of localization;GO:0051179//localization;GO:0006810//transport	-	-	-	-
Aradu.D5B5P	630.663	124.823	11.5867	2.14667	-2.4323	3.40068e-50	7.72444e-49	Aradu.D5B5P	LRR and NB-ARC domain disease resistance protein	-	GO:0097159//organic cyclic compound binding;GO:0032549//ribonucleoside binding;GO:0000166//nucleotide binding;GO:0017076//purine nucleotide binding;GO:0032553//ribonucleotide binding;GO:0043168//anion binding;GO:0001882//nucleoside binding;GO:0097367//carbohydrate derivative binding;GO:0005488//binding;GO:0030554//adenyl nucleotide binding;GO:0032559//adenyl ribonucleotide binding;GO:0036094//sma…	GO:0006952//defense response;GO:0006950//response to stress;GO:0050896//response to stimulus	-	-	-	-
Aradu.D5VFR	620.333	70.3333	31.1233	3.24	-3.26393	1.35267e-88	5.98712e-87	Aradu.D5VFR	cytochrome P450, family 718	-	GO:0020037//heme binding;GO:0005506//iron ion binding;GO:0046872//metal ion binding;GO:1901363//heterocyclic compound binding;GO:0005488//binding;GO:0097159//organic cyclic compound binding;GO:0046906//tetrapyrrole binding;GO:0043167//ion binding;GO:0043169//cation binding;GO:0046914//transition metal ion binding	GO:0055114//oxidation-reduction process;GO:0008152//metabolic process;GO:0044710//single-organism metabolic process;GO:0044699//single-organism process	-	-	-	-
Aradu.D5Z4K	5.18	0.893333	0.156667	0.0233333	-2.74723	0.00194523	0.0052155	Aradu.D5Z4K	receptor-like protein kinase 2	-	GO:0005515//protein binding;GO:0005488//binding	-	-	-	-	-
Aradu.D6YSS	26.1133	268.977	1.25667	11.92	3.24571	1.18441e-99	6.11776e-98	Aradu.D6YSS	beta-hydroxyisobutyryl-CoA hydrolase 1	-	GO:0003824//catalytic activity	GO:0008152//metabolic process	Metabolism	Amino acid metabolism;Carbohydrate metabolism;Metabolism of other amino acids;Global and Overview	ko01200//Carbon metabolism;ko00280//Valine, leucine and isoleucine degradation;ko00410//beta-Alanine metabolism;ko00640//Propanoate metabolism	K05605
Aradu.D7CPW	1.10333	9.57	0.0333333	0.29	3.12102	0.000257915	0.000792541	Aradu.D7CPW	FAD dependent oxidoreductase n	-	-	-	-	-	-	-
Aradu.D7ILP	68.4	10.3767	0.8	0.11	-2.8625	2.51601e-25	2.95024e-24	Aradu.D7ILP	1-aminocyclopropane-1-carboxylate synthase 9	-	GO:0043167//ion binding;GO:1901363//heterocyclic compound binding;GO:0003824//catalytic activity;GO:0043168//anion binding;GO:0005488//binding;GO:0048037//cofactor binding;GO:0097159//organic cyclic compound binding;GO:0030170//pyridoxal phosphate binding	GO:0009058//biosynthetic process;GO:0008152//metabolic process	-	-	-	-
Aradu.D7LWC	13.5167	204.653	1.14667	15.6767	3.7731	1.28511e-81	5.10315e-80	Aradu.D7LWC	Glutathione S-transferase family protein	GO:0005623//cell;GO:0044464//cell part;GO:0044424//intracellular part;GO:0005622//intracellular;GO:0005737//cytoplasm	GO:0004364//glutathione transferase activity;GO:0016740//transferase activity;GO:0016765//transferase activity, transferring alkyl or aryl (other than methyl) groups;GO:0003824//catalytic activity;GO:0005488//binding;GO:0005515//protein binding	GO:0008152//metabolic process	Metabolism	Metabolism of other amino acids	ko00480//Glutathione metabolism	K00799
Aradu.D8LT2	368.847	100.52	6.36	1.58667	-2.00303	5.2052e-54	1.2738e-52	Aradu.D8LT2	Protein kinase superfamily protein	-	GO:0030554//adenyl nucleotide binding;GO:0016301//kinase activity;GO:1901363//heterocyclic compound binding;GO:0005488//binding;GO:1901265//nucleoside phosphate binding;GO:0035639//purine ribonucleoside triphosphate binding;GO:0016740//transferase activity;GO:0016773//phosphotransferase activity, alcohol group as acceptor;GO:0032559//adenyl ribonucleotide binding;GO:0016772//transferase activity,…	GO:0009987//cellular process;GO:0006793//phosphorus metabolic process;GO:0016310//phosphorylation;GO:0006468//protein phosphorylation;GO:0044267//cellular protein metabolic process;GO:0071704//organic substance metabolic process;GO:0043412//macromolecule modification;GO:0008152//metabolic process;GO:0006464//cellular protein modification process;GO:0006796//phosphate-containing compound metabolic…	-	-	-	-
Aradu.D93D9	53.6667	10.6667	4.67333	0.823333	-2.5049	1.78225e-20	1.73006e-19	Aradu.D93D9	Unknown protein	-	-	-	Environmental Information Processing	Signal transduction	ko04075//Plant hormone signal transduction	K14488
Aradu.D9WZF	334.26	2010.33	10.39	57.0133	2.4561	2.36469e-180	2.75263e-178	Aradu.D9WZF	alternative oxidase 2	-	GO:0016491//oxidoreductase activity;GO:0016682//oxidoreductase activity, acting on diphenols and related substances as donors, oxygen as acceptor;GO:0016679//oxidoreductase activity, acting on diphenols and related substances as donors;GO:0003824//catalytic activity;GO:0009916//alternative oxidase activity	GO:0044710//single-organism metabolic process;GO:0055114//oxidation-reduction process;GO:0044699//single-organism process;GO:0008152//metabolic process	-	-	-	-
Aradu.DA1ZW	3.33333	0	0.0866667	0.001	-6.43741	0.00324166	0.00835113	Aradu.DA1ZW	Protein kinase superfamily protein	-	GO:0032559//adenyl ribonucleotide binding;GO:0043168//anion binding;GO:0032555//purine ribonucleotide binding;GO:0016301//kinase activity;GO:0097159//organic cyclic compound binding;GO:0016740//transferase activity;GO:0000166//nucleotide binding;GO:0043167//ion binding;GO:0001883//purine nucleoside binding;GO:0097367//carbohydrate derivative binding;GO:0005524//ATP binding;GO:0036094//small molec…	GO:0006793//phosphorus metabolic process;GO:0006464//cellular protein modification process;GO:0044260//cellular macromolecule metabolic process;GO:0006468//protein phosphorylation;GO:0019538//protein metabolic process;GO:0044237//cellular metabolic process;GO:0043412//macromolecule modification;GO:0016310//phosphorylation;GO:0009987//cellular process;GO:0006796//phosphate-containing compound meta…	-	-	-	-
Aradu.DA245	0	15.01	0.001	0.486667	8.92679	8.35673e-12	5.16676e-11	Aradu.DA245	Cytochrome P450 superfamily protein	-	GO:0046914//transition metal ion binding;GO:1901363//heterocyclic compound binding;GO:0046872//metal ion binding;GO:0005506//iron ion binding;GO:0043167//ion binding;GO:0097159//organic cyclic compound binding;GO:0005488//binding;GO:0046906//tetrapyrrole binding;GO:0020037//heme binding;GO:0043169//cation binding	GO:0044699//single-organism process;GO:0044710//single-organism metabolic process;GO:0055114//oxidation-reduction process;GO:0008152//metabolic process	-	-	-	-
Aradu.DDK47	18.0167	102.147	0.28	1.43333	2.35588	7.18812e-31	1.01557e-29	Aradu.DDK47	ATP-binding ABC transporter	GO:0031224//intrinsic component of membrane;GO:0044425//membrane part;GO:0016021//integral component of membrane;GO:0016020//membrane	GO:0016818//hydrolase activity, acting on acid anhydrides, in phosphorus-containing anhydrides;GO:0035639//purine ribonucleoside triphosphate binding;GO:0016887//ATPase activity;GO:0016787//hydrolase activity;GO:0036094//small molecule binding;GO:0097367//carbohydrate derivative binding;GO:1901363//heterocyclic compound binding;GO:0030554//adenyl nucleotide binding;GO:0005488//binding;GO:0032553/…	GO:0009987//cellular process;GO:1902578//single-organism localization;GO:0051234//establishment of localization;GO:0044765//single-organism transport;GO:0055085//transmembrane transport;GO:0044699//single-organism process;GO:0044763//single-organism cellular process;GO:0051179//localization;GO:0006810//transport	Environmental Information Processing	Membrane transport	ko02010//ABC transporters	K05658
Aradu.DF39S	393.483	12844.9	21.6267	645.543	4.89963	0	0	Aradu.DF39S	cinnamyl alcohol dehydrogenase 9	-	GO:0046872//metal ion binding;GO:0003824//catalytic activity;GO:0008270//zinc ion binding;GO:0005488//binding;GO:0016491//oxidoreductase activity;GO:0043169//cation binding;GO:0046914//transition metal ion binding;GO:0043167//ion binding	GO:0044710//single-organism metabolic process;GO:0055114//oxidation-reduction process;GO:0044699//single-organism process;GO:0008152//metabolic process	Metabolism	Biosynthesis of other secondary metabolites	ko00940//Phenylpropanoid biosynthesis	K00083
Aradu.DF8LC	30	8.33333	6.92667	1.72	-2.00975	1.24117e-09	6.57716e-09	Aradu.DF8LC	PREDICTED: uncharacterized protein LOC100800379 isoform X1	-	-	-	-	-	-	-
Aradu.DG44N	31.4267	412.047	0.916667	11.0067	3.58584	2.33704e-131	1.74007e-129	Aradu.DG44N	40S ribosomal protein S20-2	GO:0043229//intracellular organelle;GO:0043228//non-membrane-bounded organelle;GO:0043232//intracellular non-membrane-bounded organelle;GO:0044422//organelle part;GO:0044444//cytoplasmic part;GO:0044446//intracellular organelle part;GO:0005840//ribosome;GO:0044391//ribosomal subunit;GO:0032991//macromolecular complex;GO:0044464//cell part;GO:0044424//intracellular part;GO:0005623//cell;GO:0005622…	GO:0003735//structural constituent of ribosome;GO:0005198//structural molecule activity	GO:0044249//cellular biosynthetic process;GO:0044238//primary metabolic process;GO:0044260//cellular macromolecule metabolic process;GO:0006412//translation;GO:0009059//macromolecule biosynthetic process;GO:0034645//cellular macromolecule biosynthetic process;GO:0008152//metabolic process;GO:0019538//protein metabolic process;GO:0009987//cellular process;GO:1901576//organic substance biosynthetic…	Genetic Information Processing	Translation	ko03010//Ribosome	K02969
Aradu.DG6US	4870.87	849.413	181.463	28.68	-2.66156	2.51517e-191	3.22258e-189	Aradu.DG6US	polygalacturonase 4	-	GO:0003824//catalytic activity;GO:0016787//hydrolase activity;GO:0004553//hydrolase activity, hydrolyzing O-glycosyl compounds;GO:0004650//polygalacturonase activity;GO:0016798//hydrolase activity, acting on glycosyl bonds	GO:0044238//primary metabolic process;GO:0071704//organic substance metabolic process;GO:0005975//carbohydrate metabolic process;GO:0008152//metabolic process	Metabolism	Carbohydrate metabolism	ko00500//Starch and sucrose metabolism;ko00040//Pentose and glucuronate interconversions	K01184
Aradu.DL7C8	358.103	95.6033	26.8367	6.56333	-2.0317	1.82148e-73	6.3267e-72	Aradu.DL7C8	purine permease 5	GO:0016020//membrane	-	-	-	-	-	-
Aradu.DM13Q	116.787	14.3133	10.19	1.08	-3.23805	2.85264e-40	5.14238e-39	Aradu.DM13Q	methyl esterase 5	-	-	-	-	-	-	-
Aradu.DN10D	4.40333	111.213	0.193333	4.57333	4.56408	8.13515e-49	1.79967e-47	Aradu.DN10D	calmodulin-binding family protein	-	-	-	-	-	-	-
Aradu.DPT5Q	21.7333	125.56	0.31	1.68	2.43812	1.8208e-35	2.89874e-34	Aradu.DPT5Q	receptor kinase 3	-	GO:0097367//carbohydrate derivative binding;GO:0043168//anion binding;GO:0004672//protein kinase activity;GO:0036094//small molecule binding;GO:0003824//catalytic activity;GO:0016772//transferase activity, transferring phosphorus-containing groups;GO:0016301//kinase activity;GO:0005488//binding;GO:0032549//ribonucleoside binding;GO:0017076//purine nucleotide binding;GO:0032550//purine ribonucleos…	GO:0044260//cellular macromolecule metabolic process;GO:0071704//organic substance metabolic process;GO:0006468//protein phosphorylation;GO:0009987//cellular process;GO:0016310//phosphorylation;GO:0008152//metabolic process;GO:0044238//primary metabolic process;GO:0019538//protein metabolic process;GO:0044267//cellular protein metabolic process;GO:0043412//macromolecule modification;GO:0036211//p…	-	-	-	-
Aradu.DQR3M	63.53	9.14	4.38333	0.57	-2.94299	1.07595e-29	1.45975e-28	Aradu.DQR3M	NAC domain containing protein 25	-	GO:0005488//binding;GO:0097159//organic cyclic compound binding;GO:1901363//heterocyclic compound binding;GO:0003676//nucleic acid binding;GO:0003677//DNA binding	-	-	-	-	-
Aradu.DUW28	324.463	75.3333	65.31	13.86	-2.23638	4.04337e-51	9.34347e-50	Aradu.DUW28	3-oxo-5-alpha-steroid 4-dehydrogenase family protein	-	-	-	Metabolism	Lipid metabolism;Global and Overview	ko01212//Fatty acid metabolism;ko01040//Biosynthesis of unsaturated fatty acids;ko00062//Fatty acid elongation	K10258
Aradu.DV277	23.3367	3.33333	1.45	0.186667	-2.95752	2.35375e-12	1.50823e-11	Aradu.DV277	PREDICTED: cysteine-rich receptor-like protein kinase 3-like	-	-	-	-	-	-	-
Aradu.DV28N	58.12	12.5167	3.17667	0.636667	-2.3189	5.81123e-17	4.81968e-16	Aradu.DV28N	1-aminocyclopropane-1-carboxylate synthase 11	-	GO:0048037//cofactor binding;GO:0003824//catalytic activity;GO:0030170//pyridoxal phosphate binding;GO:1901363//heterocyclic compound binding;GO:0043167//ion binding;GO:0043168//anion binding;GO:0005488//binding;GO:0097159//organic cyclic compound binding	GO:0008152//metabolic process;GO:0009058//biosynthetic process	Metabolism	Amino acid metabolism	ko00270//Cysteine and methionine metabolism	K01762
Aradu.DV6LU	80.07	721.547	2.73	22.7167	3.05678	1.95957e-135	1.53024e-133	Aradu.DV6LU	glycerol-3-phosphate acyltransferase 6	-	-	GO:0008152//metabolic process	Metabolism	Lipid metabolism	ko00564//Glycerophospholipid metabolism;ko00561//Glycerolipid metabolism	K13508
Aradu.DV9UJ	8.14333	52.7433	0.743333	4.37	2.55555	2.13497e-18	1.89504e-17	Aradu.DV9UJ	early nodulin-related	-	-	-	-	-	-	-
Aradu.DVQ9A	47.5567	11.25	1.51333	0.326667	-2.21184	1.17909e-16	9.61671e-16	Aradu.DVQ9A	cytokinin oxidase/dehydrogenase 1	-	GO:0016645//oxidoreductase activity, acting on the CH-NH group of donors;GO:0043168//anion binding;GO:0000166//nucleotide binding;GO:0016614//oxidoreductase activity, acting on CH-OH group of donors;GO:0050660//flavin adenine dinucleotide binding;GO:0036094//small molecule binding;GO:0008762//UDP-N-acetylmuramate dehydrogenase activity;GO:0097159//organic cyclic compound binding;GO:0016616//oxido…	GO:0044237//cellular metabolic process;GO:0010817//regulation of hormone levels;GO:0009308//amine metabolic process;GO:0071704//organic substance metabolic process;GO:0009690//cytokinin metabolic process;GO:0034754//cellular hormone metabolic process;GO:0006725//cellular aromatic compound metabolic process;GO:0065008//regulation of biological quality;GO:0055114//oxidation-reduction process;GO:004…	Metabolism	Metabolism of terpenoids and polyketides	ko00908//Zeatin biosynthesis	K00279
Aradu.DW9IA	178.633	1145.25	3.23333	19.1733	2.56801	8.67483e-158	8.4325e-156	Aradu.DW9IA	receptor-like protein kinase 2	-	GO:0001882//nucleoside binding;GO:0005515//protein binding;GO:0016772//transferase activity, transferring phosphorus-containing groups;GO:0032549//ribonucleoside binding;GO:0032555//purine ribonucleotide binding;GO:0032559//adenyl ribonucleotide binding;GO:0036094//small molecule binding;GO:0043168//anion binding;GO:0016740//transferase activity;GO:0003824//catalytic activity;GO:0097367//carbohyd…	GO:0071704//organic substance metabolic process;GO:0006464//cellular protein modification process;GO:0008152//metabolic process;GO:0043170//macromolecule metabolic process;GO:0044237//cellular metabolic process;GO:0016310//phosphorylation;GO:0044260//cellular macromolecule metabolic process;GO:0044238//primary metabolic process;GO:0006468//protein phosphorylation;GO:0006796//phosphate-containing …	-	-	-	-
Aradu.DW9XI	0	22.3567	0.001	1.44	10.4919	1.7839e-16	1.44485e-15	Aradu.DW9XI	MYB transcription factor MYB48	-	GO:0097159//organic cyclic compound binding;GO:0003677//DNA binding;GO:0003676//nucleic acid binding;GO:0044877//macromolecular complex binding;GO:0003682//chromatin binding;GO:0005488//binding;GO:1901363//heterocyclic compound binding	-	-	-	-	-
Aradu.DY6HA	23.1033	4.96667	3.25667	0.593333	-2.45648	4.54737e-08	2.11788e-07	Aradu.DY6HA	magnesium-dependent phosphatase-like protein	-	GO:0003824//catalytic activity;GO:0016787//hydrolase activity;GO:0016791//phosphatase activity;GO:0042578//phosphoric ester hydrolase activity;GO:0016788//hydrolase activity, acting on ester bonds	-	-	-	-	-
Aradu.E02FY	179.26	48.4433	6.31333	1.54333	-2.03235	1.99272e-37	3.34154e-36	Aradu.E02FY	late embryogenesis abundant protein	-	-	-	-	-	-	-
Aradu.E0NVE	33.2833	7.57667	1.12333	0.233333	-2.26732	1.71904e-11	1.04111e-10	Aradu.E0NVE	PREDICTED: uncharacterized protein LOC100785350	-	-	-	-	-	-	-
Aradu.E0ZXZ	134.527	21.25	3.54	0.52	-2.76717	2.49443e-44	5.00055e-43	Aradu.E0ZXZ	receptor-like protein kinase 2	-	GO:0035639//purine ribonucleoside triphosphate binding;GO:0032549//ribonucleoside binding;GO:0016301//kinase activity;GO:0016773//phosphotransferase activity, alcohol group as acceptor;GO:0005524//ATP binding;GO:0016740//transferase activity;GO:0032555//purine ribonucleotide binding;GO:0032550//purine ribonucleoside binding;GO:1901265//nucleoside phosphate binding;GO:0001882//nucleoside binding;G…	GO:0044237//cellular metabolic process;GO:0016310//phosphorylation;GO:0006796//phosphate-containing compound metabolic process;GO:0044260//cellular macromolecule metabolic process;GO:0044267//cellular protein metabolic process;GO:0019538//protein metabolic process;GO:0006468//protein phosphorylation;GO:0043412//macromolecule modification;GO:0071704//organic substance metabolic process;GO:0036211/…	-	-	-	-
Aradu.E1GHD	44	364.667	9.20333	69.92	2.92548	2.39069e-110	1.39726e-108	Aradu.E1GHD	Protein of unknown function (DUF1685)	-	-	-	-	-	-	-
Aradu.E1VP1	71.2033	333.107	2.86667	12.2667	2.0973	6.81019e-67	2.13739e-65	Aradu.E1VP1	PREDICTED: mitochondrial substrate carrier family protein B-like	-	-	GO:1902578//single-organism localization;GO:0051179//localization;GO:0009987//cellular process;GO:0044699//single-organism process;GO:0044765//single-organism transport;GO:0044763//single-organism cellular process;GO:0051234//establishment of localization;GO:0006810//transport;GO:0055085//transmembrane transport	-	-	-	-
Aradu.E4KVE	1.33333	7	0.09	0.443333	2.30039	0.00347115	0.00888472	Aradu.E4KVE	PREDICTED: isoflavone reductase-like protein-like	-	-	-	-	-	-	-
Aradu.E4Q6C	9.33333	79.3267	0.45	3.46	2.94278	7.88914e-33	1.1751e-31	Aradu.E4Q6C	transmembrane amino acid transporter family protein	-	-	-	-	-	-	-
Aradu.E4RXF	3	13.3333	0.153333	0.64	2.0614	7.7126e-05	0.000254876	Aradu.E4RXF	PREDICTED: benzyl alcohol O-benzoyltransferase	-	-	-	-	-	-	-
Aradu.E6GI1	2299.52	148.03	144.443	8.53333	-4.08125	0	0	Aradu.E6GI1	NAD(P)-binding Rossmann-fold superfamily protein	-	GO:0003824//catalytic activity;GO:0016491//oxidoreductase activity	GO:0008152//metabolic process	Metabolism	Metabolism of terpenoids and polyketides	ko00902//Monoterpenoid biosynthesis	K15095
Aradu.E6J8T	2.78333	37.3567	0.116667	1.47333	3.65862	7.99696e-20	7.57371e-19	Aradu.E6J8T	PREDICTED: uncharacterized protein LOC100797259 isoform X4	-	GO:0043169//cation binding;GO:1901363//heterocyclic compound binding;GO:0005488//binding;GO:0097159//organic cyclic compound binding;GO:0008270//zinc ion binding;GO:0046914//transition metal ion binding;GO:0003676//nucleic acid binding;GO:0043167//ion binding;GO:0046872//metal ion binding	-	-	-	-	-
Aradu.E721V	52.6667	442	17.01	132.653	2.96321	4.30826e-109	2.47663e-107	Aradu.E721V	kunitz trypsin inhibitor 1	-	GO:0061134//peptidase regulator activity;GO:0030234//enzyme regulator activity;GO:0004866//endopeptidase inhibitor activity;GO:0098772//molecular function regulator;GO:0030414//peptidase inhibitor activity;GO:0061135//endopeptidase regulator activity;GO:0004857//enzyme inhibitor activity	-	-	-	-	-
Aradu.E740H	17	107	12.0233	69.64	2.53408	2.27193e-32	3.3458e-31	Aradu.E740H	heat shock transcription factor B3	-	-	-	-	-	-	-
Aradu.E8J8G	0	3.66667	0.001	0.1	6.64386	0.00135886	0.0037353	Aradu.E8J8G	Serine/Threonine kinase family protein	-	GO:0016773//phosphotransferase activity, alcohol group as acceptor;GO:0043167//ion binding;GO:0016740//transferase activity;GO:0043168//anion binding;GO:0017076//purine nucleotide binding;GO:0032555//purine ribonucleotide binding;GO:0005488//binding;GO:0032553//ribonucleotide binding;GO:0004672//protein kinase activity;GO:0030554//adenyl nucleotide binding;GO:0001883//purine nucleoside binding;GO…	GO:0006793//phosphorus metabolic process;GO:0044260//cellular macromolecule metabolic process;GO:0043170//macromolecule metabolic process;GO:0022414//reproductive process;GO:0009987//cellular process;GO:0044706//multi-multicellular organism process;GO:0044699//single-organism process;GO:0032501//multicellular organismal process;GO:0009875//pollen-pistil interaction;GO:0007154//cell communication;…	-	-	-	-
Aradu.EAH2J	5.33333	30.6667	0.68	3.48	2.35548	1.50141e-09	7.89127e-09	Aradu.EAH2J	Unknown protein	-	-	-	-	-	-	-
Aradu.ED3FV	26.6667	152.713	3.2	16.66	2.38024	2.60997e-38	4.48817e-37	Aradu.ED3FV	nudix hydrolase homolog 17	-	GO:0003824//catalytic activity;GO:0016787//hydrolase activity	-	-	-	-	-
Aradu.EDN8H	122.753	873.647	6.26	40.8567	2.70634	2.53238e-128	1.81318e-126	Aradu.EDN8H	nodulin MtN21 /EamA-like transporter family protein	GO:0016020//membrane	-	-	-	-	-	-
Aradu.EF5K9	4	893.307	0.153333	30.79	7.64965	0	0	Aradu.EF5K9	terpene synthase 02	-	GO:0016838//carbon-oxygen lyase activity, acting on phosphates;GO:0000287//magnesium ion binding;GO:0016835//carbon-oxygen lyase activity;GO:0016829//lyase activity;GO:0003824//catalytic activity;GO:0010333//terpene synthase activity;GO:0043167//ion binding;GO:0043169//cation binding;GO:0005488//binding;GO:0046872//metal ion binding	GO:0008152//metabolic process	Metabolism	Metabolism of terpenoids and polyketides	ko00902//Monoterpenoid biosynthesis	K15086
Aradu.EFH8P	20	2	0.646667	0.0566667	-3.51245	7.27568e-12	4.51933e-11	Aradu.EFH8P	dentin sialophosphoprotein, putative	-	-	-	-	-	-	-
Aradu.EH3DA	387.663	1721.08	16.0233	65.6533	2.03469	1.2893e-133	9.83505e-132	Aradu.EH3DA	strictosidine synthase-like 3	-	GO:0016843//amine-lyase activity;GO:0016844//strictosidine synthase activity;GO:0003824//catalytic activity;GO:0016829//lyase activity;GO:0016840//carbon-nitrogen lyase activity	GO:0009058//biosynthetic process;GO:0008152//metabolic process	-	-	-	-
Aradu.EHC6P	480.95	2228.71	15.4133	65.4533	2.08629	3.68802e-213	5.6266e-211	Aradu.EHC6P	3-phosphoshikimate 1-carboxyvinyltransferase	-	GO:0003866//3-phosphoshikimate 1-carboxyvinyltransferase activity;GO:0003824//catalytic activity;GO:0016740//transferase activity;GO:0016765//transferase activity, transferring alkyl or aryl (other than methyl) groups	-	Metabolism	Global and Overview;Amino acid metabolism	ko01230//Biosynthesis of amino acids;ko00400//Phenylalanine, tyrosine and tryptophan biosynthesis	K00800
Aradu.EI4DF	79.7367	11.5833	2	0.283333	-2.81943	2.26063e-18	2.00435e-17	Aradu.EI4DF	subtilisin-like serine protease 2	-	GO:0005488//binding;GO:0004252//serine-type endopeptidase activity;GO:0008233//peptidase activity;GO:0004175//endopeptidase activity;GO:0005515//protein binding;GO:0042802//identical protein binding;GO:0003824//catalytic activity;GO:0017171//serine hydrolase activity;GO:0070011//peptidase activity, acting on L-amino acid peptides;GO:0016787//hydrolase activity;GO:0008236//serine-type peptidase ac…	GO:0050790//regulation of catalytic activity;GO:0050789//regulation of biological process;GO:0044092//negative regulation of molecular function;GO:0048519//negative regulation of biological process;GO:0006508//proteolysis;GO:0065009//regulation of molecular function;GO:0043170//macromolecule metabolic process;GO:0044238//primary metabolic process;GO:0043086//negative regulation of catalytic activ…	-	-	-	-
Aradu.EIB6X	27.65	522.5	0.793333	13.66	4.10589	3.20138e-191	4.09243e-189	Aradu.EIB6X	Potassium transporter family protein	GO:0016020//membrane	GO:0005215//transporter activity;GO:0022892//substrate-specific transporter activity;GO:0022891//substrate-specific transmembrane transporter activity;GO:0008324//cation transmembrane transporter activity;GO:0015075//ion transmembrane transporter activity;GO:0022890//inorganic cation transmembrane transporter activity;GO:0015079//potassium ion transmembrane transporter activity;GO:0015077//monova…	GO:0030001//metal ion transport;GO:0071804//cellular potassium ion transport;GO:0044699//single-organism process;GO:0015672//monovalent inorganic cation transport;GO:0098662//inorganic cation transmembrane transport;GO:0055085//transmembrane transport;GO:0006810//transport;GO:1902578//single-organism localization;GO:0071805//potassium ion transmembrane transport;GO:0009987//cellular process;GO:00…	-	-	-	-
Aradu.EKX2U	34	187.663	6.20667	31.47	2.34209	1.30232e-54	3.22647e-53	Aradu.EKX2U	indole-3-acetic acid inducible 2	GO:0044464//cell part;GO:0043226//organelle;GO:0043229//intracellular organelle;GO:0044424//intracellular part;GO:0043227//membrane-bounded organelle;GO:0043231//intracellular membrane-bounded organelle;GO:0005623//cell;GO:0005634//nucleus;GO:0005622//intracellular	-	-	Environmental Information Processing	Signal transduction	ko04075//Plant hormone signal transduction	K14484
Aradu.ELJ24	251.24	64.8633	10.2	2.41333	-2.07947	6.42778e-63	1.8774e-61	Aradu.ELJ24	unknown protein	-	-	-	-	-	-	-
Aradu.EM8MP	0.333333	29.6633	0.01	0.756667	6.24159	5.60374e-21	5.56607e-20	Aradu.EM8MP	beta-galactosidase 15	-	GO:0030246//carbohydrate binding;GO:0005488//binding	GO:0044238//primary metabolic process;GO:0005975//carbohydrate metabolic process;GO:0071704//organic substance metabolic process;GO:0008152//metabolic process	-	-	-	-
Aradu.ENG34	8.24	132.7	1.26	19.01	3.91526	5.30594e-57	1.38115e-55	Aradu.ENG34	Translation initiation factor SUI1 family protein	-	GO:0097159//organic cyclic compound binding;GO:0003723//RNA binding;GO:0005488//binding;GO:0003743//translation initiation factor activity;GO:0003676//nucleic acid binding;GO:0008135//translation factor activity, RNA binding;GO:1901363//heterocyclic compound binding	GO:0044238//primary metabolic process;GO:0009059//macromolecule biosynthetic process;GO:0009987//cellular process;GO:0006412//translation;GO:0044237//cellular metabolic process;GO:0044267//cellular protein metabolic process;GO:0009058//biosynthetic process;GO:0019538//protein metabolic process;GO:0006413//translational initiation;GO:0008152//metabolic process;GO:0010467//gene expression;GO:190157…	Genetic Information Processing	Translation	ko03013//RNA transport	K03113
Aradu.ENR50	62.2467	14.6267	2.72	0.573333	-2.24616	1.05065e-16	8.60169e-16	Aradu.ENR50	PREDICTED: anthocyanin 5-aromatic acyltransferase-like	-	-	-	-	-	-	-
Aradu.EP6I4	331.457	1694.25	17.3267	81.6667	2.23675	2.93437e-94	1.40067e-92	Aradu.EP6I4	HXXXD-type acyl-transferase family protein	-	-	-	Metabolism	Lipid metabolism	ko00073//Cutin, suberine and wax biosynthesis	K15400
Aradu.EQ3HU	167	3054.06	11.5867	194.607	4.07002	0	0	Aradu.EQ3HU	galactinol synthase 1	-	-	-	Metabolism	Carbohydrate metabolism	ko00052//Galactose metabolism	K18819
Aradu.ES0JT	4.66667	37.25	0.563333	4.09	2.86004	1.97558e-15	1.51569e-14	Aradu.ES0JT	PREDICTED: subtilisin-like protease-like isoform X7	-	GO:0005488//binding;GO:0070011//peptidase activity, acting on L-amino acid peptides;GO:0004175//endopeptidase activity;GO:0008236//serine-type peptidase activity;GO:0005515//protein binding;GO:0004252//serine-type endopeptidase activity;GO:0008233//peptidase activity;GO:0042802//identical protein binding;GO:0016787//hydrolase activity;GO:0003824//catalytic activity;GO:0017171//serine hydrolase ac…	GO:0050790//regulation of catalytic activity;GO:0048519//negative regulation of biological process;GO:0009892//negative regulation of metabolic process;GO:0065007//biological regulation;GO:0050789//regulation of biological process;GO:0065009//regulation of molecular function;GO:0019222//regulation of metabolic process;GO:0043086//negative regulation of catalytic activity;GO:0044092//negative regu…	-	-	-	-
Aradu.ES9F5	21.5167	139.637	0.833333	4.99	2.58207	1.53561e-43	3.02216e-42	Aradu.ES9F5	Glycerol-3-phosphate dehydrogenase [NAD(P)+]	GO:0032991//macromolecular complex;GO:0044464//cell part;GO:1990204//oxidoreductase complex;GO:0005737//cytoplasm;GO:0044444//cytoplasmic part;GO:0005622//intracellular;GO:1902494//catalytic complex;GO:0005623//cell;GO:0009331//glycerol-3-phosphate dehydrogenase complex;GO:0043234//protein complex;GO:0044424//intracellular part	GO:0000166//nucleotide binding;GO:0016491//oxidoreductase activity;GO:0036094//small molecule binding;GO:0016616//oxidoreductase activity, acting on the CH-OH group of donors, NAD or NADP as acceptor;GO:0097159//organic cyclic compound binding;GO:0048037//cofactor binding;GO:0005488//binding;GO:0050662//coenzyme binding;GO:0003824//catalytic activity;GO:1901363//heterocyclic compound binding;GO:0…	GO:0019637//organophosphate metabolic process;GO:0044237//cellular metabolic process;GO:0006793//phosphorus metabolic process;GO:0046168//glycerol-3-phosphate catabolic process;GO:0052646//alditol phosphate metabolic process;GO:1901135//carbohydrate derivative metabolic process;GO:0046434//organophosphate catabolic process;GO:0071704//organic substance metabolic process;GO:0006796//phosphate-cont…	Metabolism	Lipid metabolism	ko00564//Glycerophospholipid metabolism	K00006
Aradu.ETY3A	227.36	7349.51	9.67667	288.1	4.89592	0	0	Aradu.ETY3A	PREDICTED: chalcone synthase	-	GO:0003824//catalytic activity	GO:0008152//metabolic process;GO:0009058//biosynthetic process	Metabolism;Organismal Systems	Environmental adaptation;Biosynthesis of other secondary metabolites	ko04712//Circadian rhythm - plant;ko00941//Flavonoid biosynthesis	K00660
Aradu.EU9MI	146.78	1455.5	4.57	41.6867	3.18932	2.74368e-308	8.08534e-306	Aradu.EU9MI	ATP-binding ABC transporter	GO:0016020//membrane	GO:0001883//purine nucleoside binding;GO:0097159//organic cyclic compound binding;GO:0043167//ion binding;GO:0016462//pyrophosphatase activity;GO:0005524//ATP binding;GO:0017111//nucleoside-triphosphatase activity;GO:0030554//adenyl nucleotide binding;GO:0016787//hydrolase activity;GO:1901265//nucleoside phosphate binding;GO:0032553//ribonucleotide binding;GO:1901363//heterocyclic compound bindin…	-	-	-	-	-
Aradu.EU9QC	34.6667	185.667	6.19333	30.23	2.28719	6.79005e-50	1.53114e-48	Aradu.EU9QC	PREDICTED: vitellogenin-2-like	-	-	-	-	-	-	-
Aradu.EVW0U	1.32	39.1367	0.0966667	2.52333	4.70617	1.41039e-18	1.26412e-17	Aradu.EVW0U	Protein of unknown function (DUF506)	-	-	-	-	-	-	-
Aradu.EWH58	20.9567	2.66667	0.503333	0.0633333	-2.99048	4.30081e-11	2.52948e-10	Aradu.EWH58	glutamate receptor 2.8	GO:0016020//membrane	GO:0005234//extracellular-glutamate-gated ion channel activity;GO:0005230//extracellular ligand-gated ion channel activity;GO:0022836//gated channel activity;GO:0005231//excitatory extracellular ligand-gated ion channel activity;GO:0022892//substrate-specific transporter activity;GO:0004970//ionotropic glutamate receptor activity;GO:0005215//transporter activity;GO:0022838//substrate-specific cha…	GO:0051179//localization;GO:0051234//establishment of localization;GO:0006810//transport	-	-	-	-
Aradu.EWR3P	53.4233	230.813	3.80333	15.2233	2.00095	6.52904e-41	1.1978e-39	Aradu.EWR3P	PREDICTED: cystinosin homolog isoform 1	-	-	-	-	-	-	-
Aradu.EYQ2A	2785.78	751.26	142.68	35.0767	-2.0242	4.929e-123	3.28547e-121	Aradu.EYQ2A	Pollen Ole e 1 allergen and extensin family protein	-	-	-	-	-	-	-
Aradu.EZ8L5	96.6667	439.333	3.14333	13.11	2.0603	1.15448e-60	3.20796e-59	Aradu.EZ8L5	nitrate transporter 1.1	GO:0016020//membrane	GO:0005215//transporter activity	GO:0051234//establishment of localization;GO:0006810//transport;GO:0051179//localization	-	-	-	-
Aradu.EZJ0T	108	11.07	5.16667	0.483333	-3.41814	3.73694e-44	7.46735e-43	Aradu.EZJ0T	cytochrome P450, family 718	-	GO:0046914//transition metal ion binding;GO:0005488//binding;GO:0005506//iron ion binding;GO:0043169//cation binding;GO:0097159//organic cyclic compound binding;GO:1901363//heterocyclic compound binding;GO:0046906//tetrapyrrole binding;GO:0020037//heme binding;GO:0043167//ion binding;GO:0046872//metal ion binding	GO:0044699//single-organism process;GO:0044710//single-organism metabolic process;GO:0008152//metabolic process;GO:0055114//oxidation-reduction process	-	-	-	-
Aradu.EZU9P	1.81667	170.173	0.03	2.44333	6.34774	6.75035e-82	2.69202e-80	Aradu.EZU9P	ABC transporter family protein (ATP-binding component)	GO:0044425//membrane part;GO:0016020//membrane;GO:0031224//intrinsic component of membrane;GO:0016021//integral component of membrane	GO:0017111//nucleoside-triphosphatase activity;GO:0043168//anion binding;GO:1901265//nucleoside phosphate binding;GO:0016787//hydrolase activity;GO:0032553//ribonucleotide binding;GO:0016887//ATPase activity;GO:0097159//organic cyclic compound binding;GO:0043167//ion binding;GO:0016462//pyrophosphatase activity;GO:0001882//nucleoside binding;GO:0030554//adenyl nucleotide binding;GO:1901363//heter…	GO:0055085//transmembrane transport;GO:0009987//cellular process;GO:0044763//single-organism cellular process;GO:0044699//single-organism process;GO:0051179//localization;GO:0006810//transport;GO:1902578//single-organism localization;GO:0044765//single-organism transport;GO:0051234//establishment of localization	Environmental Information Processing	Membrane transport	ko02010//ABC transporters	K05658
Aradu.EZY28	5.33333	0.446667	0.193333	0.0166667	-3.53605	0.00310764	0.00803397	Aradu.EZY28	putative indole-3-acetic acid-amido synthetase GH3.9	-	-	-	Environmental Information Processing	Signal transduction	ko04075//Plant hormone signal transduction	K14487
Aradu.F018C	16.3333	2.66667	0.706667	0.0933333	-2.92057	1.65004e-06	6.61518e-06	Aradu.F018C	BTB/POZ domain-containing protein	-	GO:0005488//binding;GO:0005515//protein binding	-	-	-	-	-
Aradu.F0FER	41.3567	216.393	2.06333	9.87667	2.25905	1.27437e-37	2.15049e-36	Aradu.F0FER	UDP-glucose 6-dehydrogenase family protein	-	GO:0016614//oxidoreductase activity, acting on CH-OH group of donors;GO:0050662//coenzyme binding;GO:1901363//heterocyclic compound binding;GO:0003824//catalytic activity;GO:0097159//organic cyclic compound binding;GO:0000166//nucleotide binding;GO:0048037//cofactor binding;GO:1901265//nucleoside phosphate binding;GO:0051287//NAD binding;GO:0016491//oxidoreductase activity;GO:0005488//binding;GO:…	GO:0044710//single-organism metabolic process;GO:0044699//single-organism process;GO:0008152//metabolic process;GO:0055114//oxidation-reduction process	Metabolism	Carbohydrate metabolism	ko00500//Starch and sucrose metabolism;ko00520//Amino sugar and nucleotide sugar metabolism;ko00040//Pentose and glucuronate interconversions;ko00053//Ascorbate and aldarate metabolism	K00012
Aradu.F19Z7	4.13667	25.0567	0.0733333	0.4	2.44746	1.32055e-09	6.98328e-09	Aradu.F19Z7	receptor-like protein kinase 2	-	GO:0003824//catalytic activity;GO:0005524//ATP binding;GO:0001882//nucleoside binding;GO:1901265//nucleoside phosphate binding;GO:0017076//purine nucleotide binding;GO:0005515//protein binding;GO:0004672//protein kinase activity;GO:0032555//purine ribonucleotide binding;GO:0016772//transferase activity, transferring phosphorus-containing groups;GO:0032553//ribonucleotide binding;GO:0030554//adeny…	GO:0008152//metabolic process;GO:0006796//phosphate-containing compound metabolic process;GO:0009987//cellular process;GO:0006793//phosphorus metabolic process;GO:0043412//macromolecule modification;GO:0036211//protein modification process;GO:0044260//cellular macromolecule metabolic process;GO:0071704//organic substance metabolic process;GO:0006464//cellular protein modification process;GO:00431…	-	-	-	-
Aradu.F3GB1	3.93	73.5633	0.143333	2.40667	4.06959	2.29548e-39	4.04935e-38	Aradu.F3GB1	laccase 7	GO:0005576//extracellular region;GO:0048046//apoplast	GO:0043167//ion binding;GO:0005488//binding;GO:0046914//transition metal ion binding;GO:0046872//metal ion binding;GO:0005507//copper ion binding;GO:0043169//cation binding;GO:0016679//oxidoreductase activity, acting on diphenols and related substances as donors;GO:0016491//oxidoreductase activity;GO:0016682//oxidoreductase activity, acting on diphenols and related substances as donors, oxygen as…	GO:0044712//single-organism catabolic process;GO:0044710//single-organism metabolic process;GO:0071704//organic substance metabolic process;GO:0009808//lignin metabolic process;GO:0046274//lignin catabolic process;GO:0009698//phenylpropanoid metabolic process;GO:0044699//single-organism process;GO:0055114//oxidation-reduction process;GO:0044763//single-organism cellular process;GO:0006725//cellul…	-	-	-	-
Aradu.F3KB2	3.66667	15.6667	0.406667	1.63	2.00295	0.000144901	0.000460661	Aradu.F3KB2	AWPM-19-like family protein	-	-	-	-	-	-	-
Aradu.F46YV	268.67	64.61	9.43	2.06333	-2.19228	1.73495e-71	5.85544e-70	Aradu.F46YV	Serinc-domain containing serine and sphingolipid biosynthesis protein	GO:0016020//membrane	-	-	-	-	-	-
Aradu.F4C71	19	104.997	2.83667	14.42	2.3458	9.14749e-30	1.24557e-28	Aradu.F4C71	Homeobox-leucine zipper protein family	GO:0044464//cell part;GO:0043231//intracellular membrane-bounded organelle;GO:0043229//intracellular organelle;GO:0005634//nucleus;GO:0043226//organelle;GO:0005622//intracellular;GO:0005623//cell;GO:0044424//intracellular part;GO:0043227//membrane-bounded organelle	GO:0003676//nucleic acid binding;GO:0043565//sequence-specific DNA binding;GO:0005488//binding;GO:0003677//DNA binding;GO:0001071//nucleic acid binding transcription factor activity;GO:0097159//organic cyclic compound binding;GO:1901363//heterocyclic compound binding;GO:0003700//sequence-specific DNA binding transcription factor activity	-	-	-	-	-
Aradu.F4EPB	133.867	15.0033	5.90667	0.61	-3.27546	1.85679e-46	3.89814e-45	Aradu.F4EPB	PREDICTED: uncharacterized protein LOC100800379 isoform X1	-	-	-	-	-	-	-
Aradu.F5KZV	14.6033	2	1.2	0.143333	-3.06559	5.03193e-07	2.12252e-06	Aradu.F5KZV	downstream target of AGL15-4	-	-	-	-	-	-	-
Aradu.F7E8U	92.6667	606.333	4.57667	27.2533	2.57406	1.45072e-97	7.26543e-96	Aradu.F7E8U	UDP-Glycosyltransferase superfamily protein	-	-	GO:0008152//metabolic process	-	-	-	-
Aradu.F99EG	56	767.667	23.2133	298.813	3.68622	2.83643e-117	1.79047e-115	Aradu.F99EG	Hypoxia-responsive family protein	-	-	-	-	-	-	-
Aradu.F9D34	0.333333	18.3333	0.02	1.02333	5.67713	4.92904e-14	3.50231e-13	Aradu.F9D34	Sugar transporter SWEET n	GO:0016021//integral component of membrane;GO:0044425//membrane part;GO:0031224//intrinsic component of membrane;GO:0016020//membrane	-	-	-	-	-	-
Aradu.F9L0R	31.73	6.96	0.76	0.146667	-2.37346	9.2657e-12	5.70544e-11	Aradu.F9L0R	potassium transporter 2	GO:0016020//membrane	GO:0022857//transmembrane transporter activity;GO:0046873//metal ion transmembrane transporter activity;GO:0022890//inorganic cation transmembrane transporter activity;GO:0022892//substrate-specific transporter activity;GO:0005215//transporter activity;GO:0022891//substrate-specific transmembrane transporter activity;GO:0015075//ion transmembrane transporter activity;GO:0008324//cation transmembr…	GO:0044765//single-organism transport;GO:0006810//transport;GO:0030001//metal ion transport;GO:0051179//localization;GO:0006812//cation transport;GO:0006813//potassium ion transport;GO:0009987//cellular process;GO:0098660//inorganic ion transmembrane transport;GO:0006811//ion transport;GO:0044763//single-organism cellular process;GO:0098662//inorganic cation transmembrane transport;GO:0071805//po…	-	-	-	-
Aradu.FB1UL	489.11	2187.15	11.4867	47.0167	2.03321	3.25198e-184	3.92418e-182	Aradu.FB1UL	PREDICTED: uncharacterized protein LOC100812174 isoform X6	-	-	-	-	-	-	-
Aradu.FB2F2	153.107	1158.52	3.62333	25.4767	2.81379	2.17119e-127	1.54077e-125	Aradu.FB2F2	respiratory burst oxidase homolog B	GO:0016020//membrane	GO:0016209//antioxidant activity;GO:0004601//peroxidase activity;GO:0016684//oxidoreductase activity, acting on peroxide as acceptor;GO:0046872//metal ion binding;GO:0043169//cation binding;GO:0003824//catalytic activity;GO:0043167//ion binding;GO:0005509//calcium ion binding;GO:0016491//oxidoreductase activity;GO:0005488//binding	GO:0044699//single-organism process;GO:0044710//single-organism metabolic process;GO:0008152//metabolic process;GO:0055114//oxidation-reduction process	Organismal Systems	Environmental adaptation	ko04626//Plant-pathogen interaction	K13447
Aradu.FBG4E	10.9767	2	0.0966667	0.0166667	-2.53605	0.000824767	0.00234565	Aradu.FBG4E	AMP-dependent synthetase and ligase family protein	-	GO:0016491//oxidoreductase activity;GO:0004601//peroxidase activity;GO:0004096//catalase activity;GO:0043168//anion binding;GO:0016684//oxidoreductase activity, acting on peroxide as acceptor;GO:0031177//phosphopantetheine binding;GO:0097159//organic cyclic compound binding;GO:0019842//vitamin binding;GO:0046906//tetrapyrrole binding;GO:1901363//heterocyclic compound binding;GO:0033218//amide bin…	GO:0008152//metabolic process;GO:0044710//single-organism metabolic process;GO:0055114//oxidation-reduction process;GO:0044699//single-organism process;GO:0006950//response to stress;GO:0006979//response to oxidative stress;GO:0050896//response to stimulus	-	-	-	-
Aradu.FBN6P	784.223	57.0233	37.2233	2.50333	-3.89428	3.29221e-266	7.55467e-264	Aradu.FBN6P	pectinesterase 11	GO:0005618//cell wall;GO:0071944//cell periphery;GO:0044464//cell part;GO:0005623//cell;GO:0030312//external encapsulating structure	GO:0030599//pectinesterase activity;GO:0003824//catalytic activity;GO:0016788//hydrolase activity, acting on ester bonds;GO:0052689//carboxylic ester hydrolase activity;GO:0016787//hydrolase activity	GO:0009987//cellular process;GO:0071840//cellular component organization or biogenesis;GO:0071555//cell wall organization;GO:0045229//external encapsulating structure organization;GO:0042545//cell wall modification;GO:0016043//cellular component organization;GO:0071554//cell wall organization or biogenesis	Metabolism	Carbohydrate metabolism	ko00500//Starch and sucrose metabolism;ko00040//Pentose and glucuronate interconversions	K01051
Aradu.FBS3S	120.143	1032.17	3.49333	27.3467	2.96869	2.112e-159	2.07826e-157	Aradu.FBS3S	Tetratricopeptide repeat (TPR)-like superfamily protein	GO:0005622//intracellular;GO:0044464//cell part;GO:0005623//cell	GO:0005488//binding;GO:0005515//protein binding	GO:0044238//primary metabolic process;GO:0046483//heterocycle metabolic process;GO:0009987//cellular process;GO:0010467//gene expression;GO:0071704//organic substance metabolic process;GO:0008152//metabolic process;GO:0043170//macromolecule metabolic process;GO:0006725//cellular aromatic compound metabolic process;GO:1901360//organic cyclic compound metabolic process;GO:0016070//RNA metabolic pro…	-	-	-	-
Aradu.FBX83	1298.66	159.007	442.97	50.5767	-3.13067	2.25933e-266	5.20585e-264	Aradu.FBX83	PREDICTED: uncharacterized protein LOC100810032	-	-	-	-	-	-	-
Aradu.FCE0K	906.65	203.777	29.0667	5.99333	-2.27794	1.30587e-97	6.55759e-96	Aradu.FCE0K	pollen protein Ole E I-like protein	-	GO:0005199//structural constituent of cell wall;GO:0005198//structural molecule activity	GO:0071554//cell wall organization or biogenesis;GO:0045229//external encapsulating structure organization;GO:0016043//cellular component organization;GO:0071840//cellular component organization or biogenesis;GO:0071669//plant-type cell wall organization or biogenesis;GO:0009664//plant-type cell wall organization;GO:0071555//cell wall organization;GO:0009987//cellular process	-	-	-	-
Aradu.FCP6L	231.53	60.3333	13.9933	3.35333	-2.06107	1.71959e-59	4.67386e-58	Aradu.FCP6L	Peroxidase superfamily protein	-	GO:0016684//oxidoreductase activity, acting on peroxide as acceptor;GO:0004601//peroxidase activity;GO:1901363//heterocyclic compound binding;GO:0003824//catalytic activity;GO:0016209//antioxidant activity;GO:0016491//oxidoreductase activity;GO:0046906//tetrapyrrole binding;GO:0020037//heme binding;GO:0097159//organic cyclic compound binding;GO:0005488//binding	GO:0008152//metabolic process;GO:0044710//single-organism metabolic process;GO:0055114//oxidation-reduction process;GO:0044699//single-organism process;GO:0006979//response to oxidative stress;GO:0050896//response to stimulus;GO:0006950//response to stress	Metabolism	Biosynthesis of other secondary metabolites	ko00940//Phenylpropanoid biosynthesis	K00430
Aradu.FE1BY	783.377	149.903	43.8533	7.66333	-2.51664	1.48699e-99	7.65241e-98	Aradu.FE1BY	C4-dicarboxylate transporter/malic acid transport protein	GO:0016020//membrane;GO:0044425//membrane part;GO:0016021//integral component of membrane;GO:0031224//intrinsic component of membrane	-	GO:0055085//transmembrane transport;GO:0044699//single-organism process;GO:0006810//transport;GO:0051234//establishment of localization;GO:1902578//single-organism localization;GO:0044763//single-organism cellular process;GO:0044765//single-organism transport;GO:0009987//cellular process;GO:0051179//localization	-	-	-	-
Aradu.FER0N	1.66667	12	0.213333	1.31667	2.62571	2.96642e-05	0.000103035	Aradu.FER0N	MYB transcription factor MYB64	-	GO:0005488//binding;GO:0003682//chromatin binding;GO:1901363//heterocyclic compound binding;GO:0097159//organic cyclic compound binding;GO:0044877//macromolecular complex binding;GO:0003677//DNA binding;GO:0003676//nucleic acid binding	-	-	-	-	-
Aradu.FF0QL	4.66667	61.3333	0.166667	2.05333	3.62293	4.61188e-26	5.54724e-25	Aradu.FF0QL	Cytochrome P450 superfamily protein	-	GO:0046914//transition metal ion binding;GO:1901363//heterocyclic compound binding;GO:0005506//iron ion binding;GO:0020037//heme binding;GO:0097159//organic cyclic compound binding;GO:0005488//binding;GO:0046872//metal ion binding;GO:0046906//tetrapyrrole binding;GO:0043167//ion binding;GO:0043169//cation binding	GO:0008152//metabolic process;GO:0044699//single-organism process;GO:0055114//oxidation-reduction process;GO:0044710//single-organism metabolic process	Metabolism	Metabolism of terpenoids and polyketides	ko00904//Diterpenoid biosynthesis	K04123
Aradu.FHT7B	19.3333	98.09	0.63	2.97333	2.23866	8.45781e-26	1.00736e-24	Aradu.FHT7B	Membrane transporter D1	GO:0016020//membrane;GO:0031224//intrinsic component of membrane;GO:0044425//membrane part;GO:0016021//integral component of membrane	GO:0022892//substrate-specific transporter activity;GO:0022891//substrate-specific transmembrane transporter activity;GO:0005215//transporter activity;GO:0022857//transmembrane transporter activity	GO:0044699//single-organism process;GO:1902578//single-organism localization;GO:0051234//establishment of localization;GO:0009987//cellular process;GO:0055085//transmembrane transport;GO:0051179//localization;GO:0006810//transport;GO:0044763//single-organism cellular process;GO:0044765//single-organism transport	-	-	-	-
Aradu.FHW89	294	2744	22.86	196.417	3.10302	5.11862e-180	5.94599e-178	Aradu.FHW89	Chitinase / Hevein / PR-4 / Wheatwin2	-	GO:0097367//carbohydrate derivative binding;GO:0008061//chitin binding;GO:0005488//binding	GO:0009607//response to biotic stimulus;GO:0051707//response to other organism;GO:0043207//response to external biotic stimulus;GO:0006952//defense response;GO:0050832//defense response to fungus;GO:0009617//response to bacterium;GO:0006950//response to stress;GO:0009605//response to external stimulus;GO:0098542//defense response to other organism;GO:0051704//multi-organism process;GO:0042742//de…	-	-	-	-
Aradu.FIU9K	30.8267	245.277	3.59333	25.8833	2.84863	7.84149e-70	2.56906e-68	Aradu.FIU9K	DNA-binding protein	GO:0043226//organelle;GO:0043227//membrane-bounded organelle;GO:0044464//cell part;GO:0044424//intracellular part;GO:0005622//intracellular;GO:0005634//nucleus;GO:0043231//intracellular membrane-bounded organelle;GO:0043229//intracellular organelle;GO:0005623//cell	GO:0097159//organic cyclic compound binding;GO:0000975//regulatory region DNA binding;GO:0044212//transcription regulatory region DNA binding;GO:0001071//nucleic acid binding transcription factor activity;GO:0001067//regulatory region nucleic acid binding;GO:0003700//sequence-specific DNA binding transcription factor activity;GO:1901363//heterocyclic compound binding;GO:0005488//binding;GO:000097…	-	-	-	-	-
Aradu.FJ7R7	36.4233	7.30667	1.64667	0.316667	-2.37851	3.62966e-14	2.60083e-13	Aradu.FJ7R7	carotenoid cleavage dioxygenase 1	-	-	-	-	-	-	-
Aradu.FL5LP	7.33333	1.66667	0.526667	0.103333	-2.34958	0.00049198	0.00144814	Aradu.FL5LP	DnaJ/Hsp40 cysteine-rich domain superfamily protein	-	GO:0031072//heat shock protein binding;GO:0005515//protein binding;GO:0005488//binding;GO:0051082//unfolded protein binding	-	-	-	-	-
Aradu.FM0YX	268.463	2463.17	6.36	53.97	3.08506	1.09078e-131	8.15404e-130	Aradu.FM0YX	seed linoleate 9S-lipoxygenase	-	GO:0005515//protein binding;GO:0003824//catalytic activity;GO:0043167//ion binding;GO:0043169//cation binding;GO:0016701//oxidoreductase activity, acting on single donors with incorporation of molecular oxygen;GO:0005488//binding;GO:0016491//oxidoreductase activity;GO:0046872//metal ion binding;GO:0016165//linoleate 13S-lipoxygenase activity;GO:0005506//iron ion binding;GO:0046914//transition met…	GO:0055114//oxidation-reduction process;GO:0008152//metabolic process;GO:0044710//single-organism metabolic process;GO:0044699//single-organism process	Metabolism	Lipid metabolism	ko00591//Linoleic acid metabolism	K15718
Aradu.FP57D	0.333333	7.62667	0.01	0.176667	4.14296	0.000317087	0.000960871	Aradu.FP57D	polyvinylalcohol dehydrogenase-like protein	-	-	-	-	-	-	-
Aradu.FQ1XF	35.6667	5489.67	1.82333	255.557	7.13092	0	0	Aradu.FQ1XF	branched-chain amino acid transaminase 2	-	GO:0016769//transferase activity, transferring nitrogenous groups;GO:0004084//branched-chain-amino-acid transaminase activity;GO:0016740//transferase activity;GO:0003824//catalytic activity;GO:0008483//transaminase activity	GO:1901564//organonitrogen compound metabolic process;GO:0008152//metabolic process;GO:0006520//cellular amino acid metabolic process;GO:0044281//small molecule metabolic process;GO:0043436//oxoacid metabolic process;GO:0044699//single-organism process;GO:0009081//branched-chain amino acid metabolic process;GO:0044237//cellular metabolic process;GO:0006807//nitrogen compound metabolic process;GO:…	Metabolism	Metabolism of cofactors and vitamins;Amino acid metabolism;Global and Overview	ko01230//Biosynthesis of amino acids;ko00270//Cysteine and methionine metabolism;ko00280//Valine, leucine and isoleucine degradation;ko01210//2-Oxocarboxylic acid metabolism;ko00770//Pantothenate and CoA biosynthesis;ko00290//Valine, leucine and isoleucine biosynthesis	K00826
Aradu.FQ6XD	8.99333	1.33333	0.913333	0.126667	-2.8501	0.000240049	0.000740774	Aradu.FQ6XD	DNA-binding protein n	GO:0005634//nucleus;GO:0044424//intracellular part;GO:0043227//membrane-bounded organelle;GO:0005623//cell;GO:0005622//intracellular;GO:0043229//intracellular organelle;GO:0043226//organelle;GO:0044464//cell part;GO:0043231//intracellular membrane-bounded organelle	GO:0005488//binding;GO:0097159//organic cyclic compound binding;GO:0001071//nucleic acid binding transcription factor activity;GO:0043565//sequence-specific DNA binding;GO:0003677//DNA binding;GO:0003700//sequence-specific DNA binding transcription factor activity;GO:0003676//nucleic acid binding;GO:1901363//heterocyclic compound binding	-	-	-	-	-
Aradu.FQP0C	2.77333	18.03	0.153333	0.953333	2.63631	5.91098e-06	2.23065e-05	Aradu.FQP0C	PREDICTED: basic 7S globulin-like	-	GO:0016787//hydrolase activity;GO:0008233//peptidase activity;GO:0004190//aspartic-type endopeptidase activity;GO:0003824//catalytic activity;GO:0004175//endopeptidase activity;GO:0070011//peptidase activity, acting on L-amino acid peptides;GO:0070001//aspartic-type peptidase activity	GO:0043170//macromolecule metabolic process;GO:0006508//proteolysis;GO:0044238//primary metabolic process;GO:0019538//protein metabolic process;GO:0071704//organic substance metabolic process;GO:0008152//metabolic process	-	-	-	-
Aradu.FQT6J	11.3333	123.69	0.22	2.20667	3.32629	1.13724e-44	2.3004e-43	Aradu.FQT6J	receptor kinase 2	-	GO:0001883//purine nucleoside binding;GO:0032549//ribonucleoside binding;GO:1901265//nucleoside phosphate binding;GO:0005488//binding;GO:0097367//carbohydrate derivative binding;GO:0043168//anion binding;GO:0030554//adenyl nucleotide binding;GO:0097159//organic cyclic compound binding;GO:0003824//catalytic activity;GO:0032550//purine ribonucleoside binding;GO:0032555//purine ribonucleotide bindin…	GO:0009987//cellular process;GO:0044237//cellular metabolic process;GO:0006464//cellular protein modification process;GO:0016310//phosphorylation;GO:0044238//primary metabolic process;GO:0071704//organic substance metabolic process;GO:0006468//protein phosphorylation;GO:0044267//cellular protein metabolic process;GO:0043412//macromolecule modification;GO:0008152//metabolic process;GO:0036211//pro…	-	-	-	-
Aradu.FSX7T	344.123	63.5867	40.7467	6.98333	-2.54469	3.39331e-91	1.55479e-89	Aradu.FSX7T	unknown protein; BEST Arabidopsis thaliana protein match is: unknown protein .	-	-	-	-	-	-	-
Aradu.FUM3Y	340.45	1796.07	10.1033	48.8733	2.27422	3.15042e-212	4.78035e-210	Aradu.FUM3Y	Membrane transporter D1 n	GO:0016020//membrane;GO:0044425//membrane part;GO:0016021//integral component of membrane;GO:0031224//intrinsic component of membrane	GO:0022891//substrate-specific transmembrane transporter activity;GO:0022892//substrate-specific transporter activity;GO:0005215//transporter activity;GO:0022857//transmembrane transporter activity	GO:0006810//transport;GO:0051234//establishment of localization;GO:0044765//single-organism transport;GO:0051179//localization;GO:0044699//single-organism process;GO:1902578//single-organism localization;GO:0044763//single-organism cellular process;GO:0055085//transmembrane transport;GO:0009987//cellular process	-	-	-	-
Aradu.FUM6Z	29.18	1458.31	1.30333	59.4633	5.51172	0	0	Aradu.FUM6Z	UDP-Glycosyltransferase superfamily protein	-	-	GO:0008152//metabolic process	-	-	-	-
Aradu.FUV3C	2.33333	11	0.1	0.436667	2.12653	0.000154422	0.000489151	Aradu.FUV3C	PREDICTED: polygalacturonase QRT3-like	-	-	-	-	-	-	-
Aradu.FV1SH	6.23333	40.19	0.25	1.41667	2.5025	8.33128e-07	3.44162e-06	Aradu.FV1SH	PREDICTED: endoglucanase 11	-	GO:0003824//catalytic activity	GO:0071704//organic substance metabolic process;GO:0008152//metabolic process;GO:0044238//primary metabolic process;GO:0005975//carbohydrate metabolic process	-	-	-	-
Aradu.FV6YV	24.1533	4.83667	0.886667	0.166667	-2.41143	5.61057e-07	2.35771e-06	Aradu.FV6YV	12-oxophytodienoate reductase 1	-	GO:1901363//heterocyclic compound binding;GO:0016491//oxidoreductase activity;GO:0097367//carbohydrate derivative binding;GO:0043167//ion binding;GO:0000166//nucleotide binding;GO:0048037//cofactor binding;GO:0010181//FMN binding;GO:0036094//small molecule binding;GO:0050662//coenzyme binding;GO:0097159//organic cyclic compound binding;GO:0043168//anion binding;GO:1901265//nucleoside phosphate bi…	GO:0008152//metabolic process;GO:0044710//single-organism metabolic process;GO:0044699//single-organism process;GO:0055114//oxidation-reduction process	Metabolism	Lipid metabolism	ko00592//alpha-Linolenic acid metabolism	K05894
Aradu.FW9SW	0.333333	112.487	0.02	5.8	8.17991	1.96942e-63	5.81899e-62	Aradu.FW9SW	GDSL-like Lipase/Acylhydrolase superfamily protein	-	GO:0016787//hydrolase activity;GO:0003824//catalytic activity	GO:0044699//single-organism process;GO:0044710//single-organism metabolic process;GO:0044238//primary metabolic process;GO:0006629//lipid metabolic process;GO:0071704//organic substance metabolic process;GO:0008152//metabolic process	-	-	-	-
Aradu.FWA9B	2	14.1467	0.103333	0.686667	2.7323	1.06617e-06	4.35228e-06	Aradu.FWA9B	SNF1-related protein kinase regulatory subunit gamma 1	-	GO:0036094//small molecule binding;GO:0005488//binding;GO:0097159//organic cyclic compound binding;GO:0030554//adenyl nucleotide binding;GO:1901363//heterocyclic compound binding;GO:1901265//nucleoside phosphate binding;GO:0017076//purine nucleotide binding;GO:0000166//nucleotide binding	-	-	-	-	-
Aradu.FWN9T	78.49	424.367	2.88333	14.2867	2.30886	2.05862e-46	4.31863e-45	Aradu.FWN9T	laccase 5	-	GO:0043169//cation binding;GO:0003824//catalytic activity;GO:0046914//transition metal ion binding;GO:0005488//binding;GO:0005507//copper ion binding;GO:0043167//ion binding;GO:0016491//oxidoreductase activity;GO:0046872//metal ion binding	GO:0055114//oxidation-reduction process;GO:0044699//single-organism process;GO:0044710//single-organism metabolic process;GO:0008152//metabolic process	-	-	-	-
Aradu.FXB1F	2.33	68.5167	0.0333333	0.94	4.81762	1.1485e-38	1.99335e-37	Aradu.FXB1F	ATP-binding ABC transporter	GO:0044425//membrane part;GO:0031224//intrinsic component of membrane;GO:0016020//membrane;GO:0016021//integral component of membrane	GO:0005524//ATP binding;GO:0097159//organic cyclic compound binding;GO:0032559//adenyl ribonucleotide binding;GO:0000166//nucleotide binding;GO:0032549//ribonucleoside binding;GO:0001883//purine nucleoside binding;GO:0043167//ion binding;GO:0005488//binding;GO:0016462//pyrophosphatase activity;GO:1901265//nucleoside phosphate binding;GO:0097367//carbohydrate derivative binding;GO:0016817//hydrola…	GO:0044765//single-organism transport;GO:0051179//localization;GO:0044699//single-organism process;GO:0055085//transmembrane transport;GO:0006810//transport;GO:0009987//cellular process;GO:0051234//establishment of localization;GO:0044763//single-organism cellular process;GO:1902578//single-organism localization	Environmental Information Processing	Membrane transport	ko02010//ABC transporters	K05658
Aradu.FXS1X	635.617	3160.76	15.8	72.21	2.19227	6.8213e-182	8.07466e-180	Aradu.FXS1X	acyl-CoA oxidase 1	GO:0005777//peroxisome;GO:0043227//membrane-bounded organelle;GO:0043231//intracellular membrane-bounded organelle;GO:0005623//cell;GO:0044424//intracellular part;GO:0042579//microbody;GO:0044444//cytoplasmic part;GO:0005737//cytoplasm;GO:0044464//cell part;GO:0043229//intracellular organelle;GO:0043226//organelle;GO:0005622//intracellular	GO:0003824//catalytic activity;GO:0016491//oxidoreductase activity;GO:1901363//heterocyclic compound binding;GO:0043167//ion binding;GO:0005488//binding;GO:0050662//coenzyme binding;GO:0043168//anion binding;GO:0050660//flavin adenine dinucleotide binding;GO:0000166//nucleotide binding;GO:0036094//small molecule binding;GO:0003995//acyl-CoA dehydrogenase activity;GO:0003997//acyl-CoA oxidase acti…	GO:0044763//single-organism cellular process;GO:0009987//cellular process;GO:1901575//organic substance catabolic process;GO:0044699//single-organism process;GO:0009056//catabolic process;GO:0044248//cellular catabolic process;GO:0044255//cellular lipid metabolic process;GO:0072329//monocarboxylic acid catabolic process;GO:0046395//carboxylic acid catabolic process;GO:0016054//organic acid catabo…	Cellular Processes;Metabolism	Global and Overview;Transport and catabolism;Lipid metabolism	ko04146//Peroxisome;ko01212//Fatty acid metabolism;ko00071//Fatty acid degradation;ko00592//alpha-Linolenic acid metabolism;ko01040//Biosynthesis of unsaturated fatty acids	K00232
Aradu.FXW2H	8.12333	0	1.07	0.001	-10.0634	1.1436e-07	5.13689e-07	Aradu.FXW2H	Lipid transfer protein	-	-	-	-	-	-	-
Aradu.FXX49	638.693	169.22	52.6033	12.7633	-2.04315	7.407e-80	2.8582e-78	Aradu.FXX49	Protein kinase superfamily protein	-	GO:0036094//small molecule binding;GO:0097159//organic cyclic compound binding;GO:0016301//kinase activity;GO:0032549//ribonucleoside binding;GO:0043168//anion binding;GO:0001882//nucleoside binding;GO:0032555//purine ribonucleotide binding;GO:0043167//ion binding;GO:0016740//transferase activity;GO:0004672//protein kinase activity;GO:0000166//nucleotide binding;GO:0030554//adenyl nucleotide bind…	GO:0019538//protein metabolic process;GO:0043170//macromolecule metabolic process;GO:0043412//macromolecule modification;GO:0044238//primary metabolic process;GO:0044260//cellular macromolecule metabolic process;GO:0016310//phosphorylation;GO:0071704//organic substance metabolic process;GO:0044237//cellular metabolic process;GO:0044267//cellular protein metabolic process;GO:0006468//protein phosp…	-	-	-	-
Aradu.FYL41	4.57333	0	0.443333	0.001	-8.79225	0.0011873	0.00329556	Aradu.FYL41	Unknown protein	-	-	-	Metabolism	Biosynthesis of other secondary metabolites	ko00940//Phenylpropanoid biosynthesis	K00430
Aradu.G0IJA	238.517	35.1733	4.68	0.626667	-2.90074	8.77714e-74	3.06959e-72	Aradu.G0IJA	disease resistance protein	-	GO:0017076//purine nucleotide binding;GO:0043167//ion binding;GO:0001883//purine nucleoside binding;GO:0005488//binding;GO:0032550//purine ribonucleoside binding;GO:1901265//nucleoside phosphate binding;GO:1901363//heterocyclic compound binding;GO:0001882//nucleoside binding;GO:0032555//purine ribonucleotide binding;GO:0032559//adenyl ribonucleotide binding;GO:0036094//small molecule binding;GO:0…	GO:0006950//response to stress;GO:0050896//response to stimulus;GO:0006952//defense response	-	-	-	-
Aradu.G0THS	38.2833	10.49	7.40333	1.81	-2.03219	5.05833e-09	2.55661e-08	Aradu.G0THS	PREDICTED: uncharacterized protein LOC100789808	-	-	-	-	-	-	-
Aradu.G1DZV	64.9867	632.31	5.23	46.0133	3.13717	4.10882e-117	2.58782e-115	Aradu.G1DZV	phloem protein 2-B2	-	GO:0005515//protein binding;GO:0005488//binding	-	-	-	-	-
Aradu.G1QH9	5.66667	0.333333	0.85	0.05	-4.08746	0.00026783	0.000821116	Aradu.G1QH9	PREDICTED: uncharacterized protein LOC100808605	-	-	-	-	-	-	-
Aradu.G1SJU	0.666667	10	0.04	0.52	3.70044	6.13478e-06	2.31199e-05	Aradu.G1SJU	hypothetical protein	-	-	-	-	-	-	-
Aradu.G26I2	2481.21	658.937	171.423	41.8933	-2.03277	9.92402e-154	9.27639e-152	Aradu.G26I2	myb transcription factor	-	GO:0005488//binding;GO:0097159//organic cyclic compound binding;GO:0003682//chromatin binding;GO:0044877//macromolecular complex binding;GO:0003677//DNA binding;GO:0003676//nucleic acid binding;GO:1901363//heterocyclic compound binding	-	-	-	-	-
Aradu.G2KK1	156.953	757.71	2.01333	8.94	2.15069	4.31965e-131	3.19079e-129	Aradu.G2KK1	receptor-like serine/threonine kinase 2	-	GO:1901265//nucleoside phosphate binding;GO:0016740//transferase activity;GO:1901363//heterocyclic compound binding;GO:0004674//protein serine/threonine kinase activity;GO:0032555//purine ribonucleotide binding;GO:0005524//ATP binding;GO:0016772//transferase activity, transferring phosphorus-containing groups;GO:0032559//adenyl ribonucleotide binding;GO:0016301//kinase activity;GO:0017076//purine…	GO:0043412//macromolecule modification;GO:0044706//multi-multicellular organism process;GO:0006464//cellular protein modification process;GO:0032501//multicellular organismal process;GO:0043170//macromolecule metabolic process;GO:0044260//cellular macromolecule metabolic process;GO:0009875//pollen-pistil interaction;GO:0022414//reproductive process;GO:0007154//cell communication;GO:0008037//cell …	-	-	-	-
Aradu.G2KXQ	17.21	3.32	0.75	0.136667	-2.45623	2.71352e-07	1.17395e-06	Aradu.G2KXQ	Protein kinase superfamily protein	-	GO:0004672//protein kinase activity;GO:0036094//small molecule binding;GO:0016773//phosphotransferase activity, alcohol group as acceptor;GO:0001882//nucleoside binding;GO:0016740//transferase activity;GO:0003824//catalytic activity;GO:0035639//purine ribonucleoside triphosphate binding;GO:0043168//anion binding;GO:0030554//adenyl nucleotide binding;GO:0032550//purine ribonucleoside binding;GO:19…	GO:0016310//phosphorylation;GO:0036211//protein modification process;GO:0009987//cellular process;GO:0008152//metabolic process;GO:0071704//organic substance metabolic process;GO:0044267//cellular protein metabolic process;GO:0043170//macromolecule metabolic process;GO:0006793//phosphorus metabolic process;GO:0006796//phosphate-containing compound metabolic process;GO:0006464//cellular protein mo…	-	-	-	-
Aradu.G2MI8	0.333333	7.66667	0.04	0.893333	4.48113	1.3954e-05	5.04846e-05	Aradu.G2MI8	Heavy metal transport/detoxification superfamily protein	-	GO:0043167//ion binding;GO:0043169//cation binding;GO:0046872//metal ion binding;GO:0005488//binding	GO:0051234//establishment of localization;GO:1902578//single-organism localization;GO:0006810//transport;GO:0006811//ion transport;GO:0051179//localization;GO:0044765//single-organism transport;GO:0030001//metal ion transport;GO:0044699//single-organism process;GO:0006812//cation transport	-	-	-	-
Aradu.G2VQL	103.093	26.75	15.65	3.72667	-2.0702	2.23857e-23	2.44184e-22	Aradu.G2VQL	PREDICTED: GTP-binding nuclear protein Ran-3-like	GO:0044464//cell part;GO:0005623//cell;GO:0016020//membrane;GO:0005622//intracellular	GO:0032549//ribonucleoside binding;GO:0097367//carbohydrate derivative binding;GO:0005525//GTP binding;GO:0016462//pyrophosphatase activity;GO:0036094//small molecule binding;GO:0017111//nucleoside-triphosphatase activity;GO:0043168//anion binding;GO:0032550//purine ribonucleoside binding;GO:0097159//organic cyclic compound binding;GO:0043167//ion binding;GO:1901265//nucleoside phosphate binding;…	GO:0033036//macromolecule localization;GO:0051649//establishment of localization in cell;GO:0050794//regulation of cellular process;GO:0016482//cytoplasmic transport;GO:0006886//intracellular protein transport;GO:0065007//biological regulation;GO:0050896//response to stimulus;GO:0046907//intracellular transport;GO:0006913//nucleocytoplasmic transport;GO:0015031//protein transport;GO:0009987//cell…	Cellular Processes	Transport and catabolism	ko04144//Endocytosis	K07904
Aradu.G307L	33.4267	215.943	1.22667	7.38667	2.59018	1.14445e-55	2.9074e-54	Aradu.G307L	Inner membrane protein yicO n	GO:0016020//membrane	GO:0005215//transporter activity	GO:0044765//single-organism transport;GO:1902578//single-organism localization;GO:0051234//establishment of localization;GO:0055085//transmembrane transport;GO:0051179//localization;GO:0009987//cellular process;GO:0006810//transport;GO:0044699//single-organism process;GO:0044763//single-organism cellular process	-	-	-	-
Aradu.G32SA	5.66667	0.333333	0.67	0.0366667	-4.19162	0.000203017	0.000632173	Aradu.G32SA	PREDICTED: arabinogalactan peptide 20-like	-	-	-	-	-	-	-
Aradu.G40TW	16.2467	2.78	0.553333	0.0866667	-2.6746	1.25253e-07	5.60371e-07	Aradu.G40TW	5'-3' exonuclease family protein	-	GO:0003824//catalytic activity;GO:0016787//hydrolase activity;GO:1901363//heterocyclic compound binding;GO:0097159//organic cyclic compound binding;GO:0003676//nucleic acid binding;GO:0003677//DNA binding;GO:0016788//hydrolase activity, acting on ester bonds;GO:0005488//binding;GO:0004518//nuclease activity	GO:0044237//cellular metabolic process;GO:0044763//single-organism cellular process;GO:1901360//organic cyclic compound metabolic process;GO:0090304//nucleic acid metabolic process;GO:0006725//cellular aromatic compound metabolic process;GO:0034641//cellular nitrogen compound metabolic process;GO:0006281//DNA repair;GO:0006259//DNA metabolic process;GO:0006950//response to stress;GO:0044699//sing…	Genetic Information Processing	Replication and repair	ko03430//Mismatch repair	K10746
Aradu.G5IDI	109.257	494.933	3.21	13.4067	2.06231	3.51769e-54	8.65753e-53	Aradu.G5IDI	PREDICTED: basic 7S globulin-like	-	GO:0008233//peptidase activity;GO:0003824//catalytic activity;GO:0070001//aspartic-type peptidase activity;GO:0016787//hydrolase activity;GO:0004175//endopeptidase activity;GO:0070011//peptidase activity, acting on L-amino acid peptides;GO:0004190//aspartic-type endopeptidase activity	GO:0071704//organic substance metabolic process;GO:0008152//metabolic process;GO:0043170//macromolecule metabolic process;GO:0019538//protein metabolic process;GO:0006508//proteolysis;GO:0044238//primary metabolic process	-	-	-	-
Aradu.G5KEN	82.5333	12	4.08333	0.566667	-2.84918	1.19594e-27	1.52014e-26	Aradu.G5KEN	lipid transfer protein	-	-	-	-	-	-	-
Aradu.G6132	13.6667	0.666667	1.02	0.0466667	-4.45003	5.99719e-10	3.25755e-09	Aradu.G6132	F-box family protein	-	GO:0005488//binding;GO:0005515//protein binding	-	-	-	-	-
Aradu.G6GR7	186.42	49.5767	9.13667	2.24333	-2.02602	4.55339e-44	9.08585e-43	Aradu.G6GR7	nodulin MtN21 /EamA-like transporter family protein	GO:0016020//membrane	-	-	-	-	-	-
Aradu.G6PP5	52.38	286.173	2.04	10.1867	2.32004	1.40913e-57	3.70589e-56	Aradu.G6PP5	transmembrane amino acid transporter family protein	-	-	-	-	-	-	-
Aradu.G71TJ	176.82	32.3133	5.98	1.00333	-2.57534	2.41405e-55	6.08304e-54	Aradu.G71TJ	PREDICTED: uncharacterized protein LOC100816954 isoform X2	-	-	-	-	-	-	-
Aradu.G7CZU	45.5133	326.073	0.83	5.48333	2.72387	4.08445e-69	1.32116e-67	Aradu.G7CZU	Cytochrome P450 superfamily protein	-	GO:0005488//binding;GO:0043167//ion binding;GO:0046914//transition metal ion binding;GO:1901363//heterocyclic compound binding;GO:0046906//tetrapyrrole binding;GO:0020037//heme binding;GO:0097159//organic cyclic compound binding;GO:0046872//metal ion binding;GO:0005506//iron ion binding;GO:0043169//cation binding	GO:0008152//metabolic process;GO:0044699//single-organism process;GO:0055114//oxidation-reduction process;GO:0044710//single-organism metabolic process	-	-	-	-
Aradu.G7TTV	0.85	9.16333	0.0733333	0.763333	3.37977	2.44708e-05	8.58434e-05	Aradu.G7TTV	Unknown protein	-	-	-	-	-	-	-
Aradu.G7UXI	5.54	35.6633	0.36	2.09	2.53743	5.8799e-12	3.67886e-11	Aradu.G7UXI	myb transcription factor	-	GO:0003682//chromatin binding;GO:1901363//heterocyclic compound binding;GO:0044877//macromolecular complex binding;GO:0005488//binding;GO:0097159//organic cyclic compound binding;GO:0003676//nucleic acid binding;GO:0003677//DNA binding	-	-	-	-	-
Aradu.G80S0	431.14	8166.14	30.18	526.36	4.12439	0	0	Aradu.G80S0	PREDICTED: chalcone synthase	-	GO:0003824//catalytic activity	GO:0009058//biosynthetic process;GO:0008152//metabolic process	Organismal Systems;Metabolism	Biosynthesis of other secondary metabolites;Environmental adaptation	ko04712//Circadian rhythm - plant;ko00941//Flavonoid biosynthesis	K00660
Aradu.G99LQ	169.133	2655.04	3.77	54.2867	3.84796	0	0	Aradu.G99LQ	seed linoleate 9S-lipoxygenase	-	GO:0051213//dioxygenase activity;GO:0003824//catalytic activity;GO:0005515//protein binding;GO:0046872//metal ion binding;GO:0016165//linoleate 13S-lipoxygenase activity;GO:0016702//oxidoreductase activity, acting on single donors with incorporation of molecular oxygen, incorporation of two atoms of oxygen;GO:0016701//oxidoreductase activity, acting on single donors with incorporation of molecula…	GO:0055114//oxidation-reduction process;GO:0044710//single-organism metabolic process;GO:0008152//metabolic process;GO:0044699//single-organism process	Metabolism	Lipid metabolism	ko00591//Linoleic acid metabolism	K15718
Aradu.G9UB3	61.4367	15.6133	2.97333	0.703333	-2.0798	1.32635e-12	8.6333e-12	Aradu.G9UB3	PREDICTED: rho GDP-dissociation inhibitor 1-like	GO:0005737//cytoplasm;GO:0005622//intracellular;GO:0044424//intracellular part;GO:0005623//cell;GO:0044464//cell part	GO:0005094//Rho GDP-dissociation inhibitor activity;GO:0060589//nucleoside-triphosphatase regulator activity;GO:0030695//GTPase regulator activity;GO:0098772//molecular function regulator;GO:0030234//enzyme regulator activity;GO:0005092//GDP-dissociation inhibitor activity	-	-	-	-	-
Aradu.GA7X1	1	8.33333	0.11	0.846667	2.94429	8.73149e-05	0.000286484	Aradu.GA7X1	PREDICTED: cytokinin riboside 5'-monophosphate phosphoribohydrolase LOG1	-	-	-	-	-	-	-
Aradu.GAW9B	127.45	2680.98	7.66667	147.787	4.26877	0	0	Aradu.GAW9B	cinnamoyl coa reductase	-	GO:0048037//cofactor binding;GO:0005488//binding;GO:0050662//coenzyme binding;GO:0003824//catalytic activity	GO:0009987//cellular process;GO:0044237//cellular metabolic process;GO:0008152//metabolic process	-	-	-	-
Aradu.GB4U4	7	372.663	0.276667	13.5833	5.61754	3.67084e-179	4.22042e-177	Aradu.GB4U4	PREDICTED: ethylene-responsive transcription factor 1A-like	-	GO:1901363//heterocyclic compound binding;GO:0003676//nucleic acid binding;GO:0003677//DNA binding;GO:0005488//binding;GO:0003700//sequence-specific DNA binding transcription factor activity;GO:0001071//nucleic acid binding transcription factor activity;GO:0097159//organic cyclic compound binding	-	-	-	-	-
Aradu.GB59Q	1	6.33333	0.03	0.203333	2.76081	0.00193235	0.00518396	Aradu.GB59Q	cyclic nucleotide-gated ion channel-like protein	GO:0016020//membrane	GO:0015075//ion transmembrane transporter activity;GO:0005216//ion channel activity;GO:0005215//transporter activity;GO:0022838//substrate-specific channel activity;GO:0022892//substrate-specific transporter activity;GO:0022803//passive transmembrane transporter activity;GO:0022857//transmembrane transporter activity;GO:0022891//substrate-specific transmembrane transporter activity;GO:0015267//ch…	GO:0051179//localization;GO:0055085//transmembrane transport;GO:0044765//single-organism transport;GO:1902578//single-organism localization;GO:0006810//transport;GO:0006811//ion transport;GO:0044699//single-organism process;GO:0009987//cellular process;GO:0044763//single-organism cellular process;GO:0051234//establishment of localization	Organismal Systems	Environmental adaptation	ko04626//Plant-pathogen interaction	K05391
Aradu.GBM3Q	4655.41	948.397	116.53	21.8767	-2.41324	7.3968e-150	6.66915e-148	Aradu.GBM3Q	cinnamyl alcohol dehydrogenase 9	-	GO:0046872//metal ion binding;GO:0003824//catalytic activity;GO:0043169//cation binding;GO:0016491//oxidoreductase activity;GO:0043167//ion binding;GO:0008270//zinc ion binding;GO:0005488//binding;GO:0046914//transition metal ion binding	GO:0044710//single-organism metabolic process;GO:0055114//oxidation-reduction process;GO:0044699//single-organism process;GO:0008152//metabolic process	Metabolism	Biosynthesis of other secondary metabolites	ko00940//Phenylpropanoid biosynthesis	K00083
Aradu.GF2Y3	5.73667	49.5	0.353333	2.84	3.00679	2.84338e-22	2.97577e-21	Aradu.GF2Y3	circadian clock coupling factor ZGT	-	-	-	-	-	-	-
Aradu.GF4WK	0	5.04	0.001	0.35	8.45121	0.000109609	0.000354994	Aradu.GF4WK	NAD(P)-binding Rossmann-fold superfamily protein	-	GO:0003824//catalytic activity;GO:0016491//oxidoreductase activity	GO:0008152//metabolic process	Metabolism	Biosynthesis of other secondary metabolites	ko00960//Tropane, piperidine and pyridine alkaloid biosynthesis	K08081
Aradu.GG5EE	25.94	3.33333	1.77	0.213333	-3.05257	1.1327e-12	7.41503e-12	Aradu.GG5EE	PQ-loop repeat family protein / transmembrane family protein	-	-	-	-	-	-	-
Aradu.GH2K1	0	13.76	0.001	1.16	10.1799	6.58849e-11	3.82315e-10	Aradu.GH2K1	basic helix-loop-helix (bHLH) DNA-binding superfamily protein	-	GO:0005488//binding;GO:0005515//protein binding;GO:0046983//protein dimerization activity	-	-	-	-	-
Aradu.GH6V7	27.6433	1.54667	12.63	0.616667	-4.35622	1.69766e-19	1.58581e-18	Aradu.GH6V7	endo-1,4-beta-glucanase	-	GO:0003824//catalytic activity	GO:0071704//organic substance metabolic process;GO:0044238//primary metabolic process;GO:0008152//metabolic process;GO:0005975//carbohydrate metabolic process	-	-	-	-
Aradu.GH8X4	4.33333	0	0.183333	0.001	-7.51833	0.000371192	0.00111379	Aradu.GH8X4	Disease resistance protein (TIR-NBS-LRR class) family	-	GO:0097367//carbohydrate derivative binding;GO:0032555//purine ribonucleotide binding;GO:0043168//anion binding;GO:0017076//purine nucleotide binding;GO:0030554//adenyl nucleotide binding;GO:0000166//nucleotide binding;GO:0043167//ion binding;GO:0036094//small molecule binding;GO:0097159//organic cyclic compound binding;GO:0032550//purine ribonucleoside binding;GO:0001883//purine nucleoside bindi…	GO:0050896//response to stimulus;GO:0006952//defense response;GO:0006950//response to stress	-	-	-	-
Aradu.GHH13	24.6667	145.667	1.75667	9.65667	2.45868	5.90476e-33	8.83993e-32	Aradu.GHH13	MtN26	-	-	-	-	-	-	-
Aradu.GHK20	2549.48	15026.8	21.5533	117.003	2.44057	9.65722e-234	1.73864e-231	Aradu.GHK20	acetyl-CoA carboxylase 1	-	GO:0032550//purine ribonucleoside binding;GO:0043168//anion binding;GO:0001882//nucleoside binding;GO:0035639//purine ribonucleoside triphosphate binding;GO:0032549//ribonucleoside binding;GO:1901363//heterocyclic compound binding;GO:0097367//carbohydrate derivative binding;GO:0032555//purine ribonucleotide binding;GO:0003989//acetyl-CoA carboxylase activity;GO:0097159//organic cyclic compound bi…	GO:0044281//small molecule metabolic process;GO:0044711//single-organism biosynthetic process;GO:0044710//single-organism metabolic process;GO:0019752//carboxylic acid metabolic process;GO:0046394//carboxylic acid biosynthetic process;GO:0008152//metabolic process;GO:0044283//small molecule biosynthetic process;GO:0044763//single-organism cellular process;GO:0071704//organic substance metabolic p…	Metabolism	Global and Overview;Carbohydrate metabolism;Lipid metabolism	ko00620//Pyruvate metabolism;ko01212//Fatty acid metabolism;ko00061//Fatty acid biosynthesis;ko00640//Propanoate metabolism	K11262
Aradu.GI97Q	102.99	23.5	5.61333	1.16	-2.27473	3.48166e-23	3.77428e-22	Aradu.GI97Q	GDSL-like Lipase/Acylhydrolase superfamily protein	-	GO:0016787//hydrolase activity;GO:0003824//catalytic activity	GO:0044238//primary metabolic process;GO:0071704//organic substance metabolic process;GO:0044710//single-organism metabolic process;GO:0044699//single-organism process;GO:0008152//metabolic process;GO:0006629//lipid metabolic process	-	-	-	-
Aradu.GJ76L	5.33667	25.5633	0.886667	3.96	2.15904	2.04424e-08	9.8206e-08	Aradu.GJ76L	thioredoxin 3	-	GO:0003824//catalytic activity;GO:0016491//oxidoreductase activity;GO:0016667//oxidoreductase activity, acting on a sulfur group of donors;GO:0015036//disulfide oxidoreductase activity;GO:0015035//protein disulfide oxidoreductase activity	GO:0019725//cellular homeostasis;GO:0044281//small molecule metabolic process;GO:0065007//biological regulation;GO:0018904//ether metabolic process;GO:0045454//cell redox homeostasis;GO:0042592//homeostatic process;GO:0006662//glycerol ether metabolic process;GO:0044699//single-organism process;GO:0050789//regulation of biological process;GO:0009987//cellular process;GO:0065008//regulation of bio…	-	-	-	-
Aradu.GJB7M	73.2767	16.2667	1.71	0.35	-2.28857	4.0058e-21	4.00372e-20	Aradu.GJB7M	origin recognition complex 1	GO:0005623//cell;GO:0043226//organelle;GO:0044424//intracellular part;GO:0043231//intracellular membrane-bounded organelle;GO:0044427//chromosomal part;GO:0005634//nucleus;GO:0043234//protein complex;GO:0043228//non-membrane-bounded organelle;GO:0043227//membrane-bounded organelle;GO:0043232//intracellular non-membrane-bounded organelle;GO:0000808//origin recognition complex;GO:0044446//intracell…	GO:0032555//purine ribonucleotide binding;GO:0044877//macromolecular complex binding;GO:0016462//pyrophosphatase activity;GO:0003824//catalytic activity;GO:0097367//carbohydrate derivative binding;GO:0001883//purine nucleoside binding;GO:0043169//cation binding;GO:1901363//heterocyclic compound binding;GO:0036094//small molecule binding;GO:0097159//organic cyclic compound binding;GO:0016817//hydr…	GO:0006725//cellular aromatic compound metabolic process;GO:0009058//biosynthetic process;GO:1901360//organic cyclic compound metabolic process;GO:0006807//nitrogen compound metabolic process;GO:0006259//DNA metabolic process;GO:0044260//cellular macromolecule metabolic process;GO:0009059//macromolecule biosynthetic process;GO:0034641//cellular nitrogen compound metabolic process;GO:0090304//nucl…	-	-	-	-
Aradu.GJG28	12.6	249.173	0.986667	17.6167	4.15823	6.03624e-87	2.609e-85	Aradu.GJG28	Chitinase family protein	-	GO:0004553//hydrolase activity, hydrolyzing O-glycosyl compounds;GO:0016787//hydrolase activity;GO:0003824//catalytic activity;GO:0004568//chitinase activity;GO:0016798//hydrolase activity, acting on glycosyl bonds	GO:0044237//cellular metabolic process;GO:0006807//nitrogen compound metabolic process;GO:0071704//organic substance metabolic process;GO:0071554//cell wall organization or biogenesis;GO:0006026//aminoglycan catabolic process;GO:0006030//chitin metabolic process;GO:0005975//carbohydrate metabolic process;GO:0006040//amino sugar metabolic process;GO:1901135//carbohydrate derivative metabolic proce…	-	-	-	-
Aradu.GLM5E	61.96	792.513	2.24	26.19	3.54745	7.15407e-176	7.99528e-174	Aradu.GLM5E	aspartate aminotransferase	-	GO:0097159//organic cyclic compound binding;GO:0005488//binding;GO:0043167//ion binding;GO:0043168//anion binding;GO:1901363//heterocyclic compound binding;GO:0030170//pyridoxal phosphate binding;GO:0003824//catalytic activity;GO:0048037//cofactor binding	GO:0009058//biosynthetic process;GO:0008152//metabolic process	Metabolism	Amino acid metabolism;Global and Overview;Biosynthesis of other secondary metabolites	ko01230//Biosynthesis of amino acids;ko00400//Phenylalanine, tyrosine and tryptophan biosynthesis;ko00350//Tyrosine metabolism;ko00360//Phenylalanine metabolism;ko00960//Tropane, piperidine and pyridine alkaloid biosynthesis;ko00950//Isoquinoline alkaloid biosynthesis	K15849
Aradu.GMU6R	1	8.01	0.0566667	0.406667	2.84327	0.000242388	0.000747333	Aradu.GMU6R	PREDICTED: gibberellin 20 oxidase 1-like	-	GO:0043169//cation binding;GO:0046914//transition metal ion binding;GO:0005488//binding;GO:0005506//iron ion binding;GO:0043167//ion binding;GO:0046872//metal ion binding;GO:0016491//oxidoreductase activity;GO:0003824//catalytic activity	GO:0008152//metabolic process;GO:0055114//oxidation-reduction process;GO:0044699//single-organism process;GO:0044710//single-organism metabolic process	Metabolism	Metabolism of terpenoids and polyketides	ko00904//Diterpenoid biosynthesis	K04124
Aradu.GNE7U	5.03667	126.853	0.223333	5.17333	4.53382	1.33961e-62	3.89035e-61	Aradu.GNE7U	UDP-Glycosyltransferase superfamily protein	-	-	GO:0008152//metabolic process	-	-	-	-
Aradu.GP6IB	2.07333	25.54	0.103333	1.2	3.53766	1.89809e-10	1.06746e-09	Aradu.GP6IB	cinnamyl alcohol dehydrogenase 9	-	GO:0046914//transition metal ion binding;GO:0046872//metal ion binding;GO:0008270//zinc ion binding;GO:0016491//oxidoreductase activity;GO:0043167//ion binding;GO:0005488//binding;GO:0043169//cation binding;GO:0003824//catalytic activity	GO:0055114//oxidation-reduction process;GO:0044710//single-organism metabolic process;GO:0008152//metabolic process;GO:0044699//single-organism process	Metabolism	Biosynthesis of other secondary metabolites	ko00940//Phenylpropanoid biosynthesis	K00083
Aradu.GQ00H	122.49	895.067	11.1333	74.55	2.74332	3.93319e-189	4.92669e-187	Aradu.GQ00H	PREDICTED: uncharacterized protein LOC100802797	-	-	-	-	-	-	-
Aradu.GQF6Z	6	0.666667	0.95	0.0966667	-3.29684	0.0037486	0.00952995	Aradu.GQF6Z	Unknown protein	-	-	-	-	-	-	-
Aradu.GS29Q	17.0033	1027.17	1.04333	56.67	5.76331	3.48168e-224	5.87177e-222	Aradu.GS29Q	kunitz trypsin inhibitor 1	-	GO:0004857//enzyme inhibitor activity;GO:0098772//molecular function regulator;GO:0030234//enzyme regulator activity;GO:0061134//peptidase regulator activity;GO:0061135//endopeptidase regulator activity;GO:0004866//endopeptidase inhibitor activity;GO:0030414//peptidase inhibitor activity	-	-	-	-	-
Aradu.GSV8K	174.66	21.6667	55.1067	6.10333	-3.17456	4.45001e-56	1.13772e-54	Aradu.GSV8K	unknown protein; BEST Arabidopsis thaliana protein match is: unknown protein .	-	-	-	-	-	-	-
Aradu.GTY35	6.51	119.333	0.506667	8.63333	4.09081	1.19766e-56	3.1031e-55	Aradu.GTY35	PREDICTED: mitochondrial substrate carrier family protein B-like	-	-	GO:0044765//single-organism transport;GO:0051234//establishment of localization;GO:1902578//single-organism localization;GO:0009987//cellular process;GO:0055085//transmembrane transport;GO:0044763//single-organism cellular process;GO:0044699//single-organism process;GO:0006810//transport;GO:0051179//localization	-	-	-	-
Aradu.GU3KU	7.78667	1.99667	0.203333	0.04	-2.34577	0.0022291	0.00591514	Aradu.GU3KU	PREDICTED: uncharacterized protein At1g04910-like	-	-	-	-	-	-	-
Aradu.GVF2D	1.33333	79.8467	0.08	4.26	5.73471	5.3979e-48	1.1719e-46	Aradu.GVF2D	alpha-amylase-like	-	GO:0016798//hydrolase activity, acting on glycosyl bonds;GO:0004553//hydrolase activity, hydrolyzing O-glycosyl compounds;GO:0005509//calcium ion binding;GO:0003824//catalytic activity;GO:0043167//ion binding;GO:0004556//alpha-amylase activity;GO:0016787//hydrolase activity;GO:0043169//cation binding;GO:0016160//amylase activity;GO:0005488//binding;GO:0046872//metal ion binding	GO:0005975//carbohydrate metabolic process;GO:0071704//organic substance metabolic process;GO:0008152//metabolic process;GO:0044238//primary metabolic process	Metabolism	Carbohydrate metabolism	ko00500//Starch and sucrose metabolism	K01176
Aradu.GW6MZ	343.303	3098.87	15.3867	127.707	3.05308	2.71355e-247	5.3498e-245	Aradu.GW6MZ	sugar transporter 9	GO:0016020//membrane;GO:0016021//integral component of membrane;GO:0031224//intrinsic component of membrane;GO:0044425//membrane part	GO:0005215//transporter activity;GO:0022857//transmembrane transporter activity	GO:0044765//single-organism transport;GO:0006810//transport;GO:0044699//single-organism process;GO:0051179//localization;GO:1902578//single-organism localization;GO:0044763//single-organism cellular process;GO:0055085//transmembrane transport;GO:0009987//cellular process;GO:0051234//establishment of localization	-	-	-	-
Aradu.GW6SP	8	0.333333	1.08333	0.0366667	-4.88486	9.55991e-05	0.00031222	Aradu.GW6SP	PREDICTED: uncharacterized protein LOC100783170	-	-	-	-	-	-	-
Aradu.GWN5L	6	1	0.62	0.0933333	-2.7318	0.00122725	0.00339719	Aradu.GWN5L	Unknown protein	-	-	-	-	-	-	-
Aradu.GXZ9Z	32.9267	263.56	1.47	10.8067	2.87803	1.43829e-75	5.21237e-74	Aradu.GXZ9Z	ser/thr-rich protein T10 in DGCR region-like protein	-	-	-	-	-	-	-
Aradu.GZ9A0	1.13667	18.5833	0.0266667	0.383333	3.84549	1.77865e-09	9.29863e-09	Aradu.GZ9A0	PREDICTED: acidic mammalian chitinase-like	-	-	GO:0008152//metabolic process;GO:0071704//organic substance metabolic process;GO:0005975//carbohydrate metabolic process;GO:0044238//primary metabolic process	Metabolism	Carbohydrate metabolism	ko00520//Amino sugar and nucleotide sugar metabolism	K01183
Aradu.GZK47	180.653	39.0633	57.76	11.79	-2.29251	4.63173e-43	9.00157e-42	Aradu.GZK47	nitrate transporter 1.1	GO:0016020//membrane	GO:0005215//transporter activity	GO:0006810//transport;GO:0051234//establishment of localization;GO:0051179//localization	-	-	-	-
Aradu.H0G14	207.407	2235.77	10.1167	100.137	3.30716	9.71689e-272	2.34508e-269	Aradu.H0G14	12-oxophytodienoate reductase 1	-	GO:0050662//coenzyme binding;GO:0043167//ion binding;GO:0032553//ribonucleotide binding;GO:0043168//anion binding;GO:0005488//binding;GO:0016491//oxidoreductase activity;GO:1901363//heterocyclic compound binding;GO:1901265//nucleoside phosphate binding;GO:0000166//nucleotide binding;GO:0010181//FMN binding;GO:0097159//organic cyclic compound binding;GO:0003824//catalytic activity;GO:0048037//cofa…	GO:0008152//metabolic process;GO:0044710//single-organism metabolic process;GO:0044699//single-organism process;GO:0055114//oxidation-reduction process	Metabolism	Lipid metabolism	ko00592//alpha-Linolenic acid metabolism	K05894
Aradu.H0Y95	0.666667	15.3333	0.1	2.11667	4.40372	2.1918e-10	1.22721e-09	Aradu.H0Y95	Unknown protein	-	-	-	-	-	-	-
Aradu.H1NDR	16.6667	94.3333	3.69667	19.2633	2.38156	7.57335e-24	8.40847e-23	Aradu.H1NDR	Unknown protein	-	-	-	-	-	-	-
Aradu.H1YN5	23.3233	299.423	1.08667	12.89	3.56827	6.03155e-97	2.99922e-95	Aradu.H1YN5	Transmembrane amino acid transporter family protein	-	-	-	-	-	-	-
Aradu.H2A8G	210.827	36.8667	12.54	2.01667	-2.63649	6.50498e-56	1.65932e-54	Aradu.H2A8G	PREDICTED: uncharacterized protein LOC100807586 isoform X2	-	-	-	-	-	-	-
Aradu.H2K8Y	69.0633	14.69	7.35	1.46667	-2.3252	1.0527e-22	1.11992e-21	Aradu.H2K8Y	LOB domain-containing protein 4	-	-	-	-	-	-	-
Aradu.H2LY1	150.203	659.54	3.51	14.2333	2.01973	4.51353e-95	2.1786e-93	Aradu.H2LY1	PREDICTED: putative calcium-transporting ATPase 13, plasma membrane-type-like	GO:0031224//intrinsic component of membrane;GO:0016021//integral component of membrane;GO:0044425//membrane part;GO:0016020//membrane	GO:0015399//primary active transmembrane transporter activity;GO:0035639//purine ribonucleoside triphosphate binding;GO:0022890//inorganic cation transmembrane transporter activity;GO:0042626//ATPase activity, coupled to transmembrane movement of substances;GO:0019829//cation-transporting ATPase activity;GO:0032549//ribonucleoside binding;GO:0032559//adenyl ribonucleotide binding;GO:0046873//meta…	GO:0034220//ion transmembrane transport;GO:0044763//single-organism cellular process;GO:0055085//transmembrane transport;GO:0098660//inorganic ion transmembrane transport;GO:0006816//calcium ion transport;GO:0098662//inorganic cation transmembrane transport;GO:0072511//divalent inorganic cation transport;GO:0070838//divalent metal ion transport;GO:0006811//ion transport;GO:0006810//transport;GO:0…	-	-	-	-
Aradu.H2NM6	34.1467	8.13333	0.766667	0.156667	-2.2909	8.71803e-09	4.32663e-08	Aradu.H2NM6	PREDICTED: histone-lysine N-methyltransferase ATX3-like isoform X1	-	GO:0046872//metal ion binding;GO:0046914//transition metal ion binding;GO:0008270//zinc ion binding;GO:0043167//ion binding;GO:0043169//cation binding;GO:0005515//protein binding;GO:0005488//binding	-	-	-	-	-
Aradu.H324N	12.39	1.01	1.16333	0.09	-3.6922	5.97981e-07	2.50535e-06	Aradu.H324N	zinc-binding alcohol dehydrogenase family protein	GO:0016020//membrane	GO:0005488//binding;GO:0043169//cation binding;GO:0043167//ion binding;GO:0003824//catalytic activity;GO:0008270//zinc ion binding;GO:0046914//transition metal ion binding;GO:0046872//metal ion binding;GO:0016491//oxidoreductase activity	GO:0044699//single-organism process;GO:0008152//metabolic process;GO:0055114//oxidation-reduction process;GO:0044710//single-organism metabolic process	-	-	-	-
Aradu.H4KIC	14.39	105.987	5.72333	39.1267	2.77322	5.64034e-40	1.00897e-38	Aradu.H4KIC	RmlC-like cupins superfamily protein	-	-	-	-	-	-	-
Aradu.H56YA	11.1033	89.5367	0.5	3.66	2.87184	7.88724e-35	1.23702e-33	Aradu.H56YA	PREDICTED: WD repeat-containing protein 5-like	-	GO:0005488//binding;GO:0005515//protein binding	-	-	-	-	-
Aradu.H5GLI	103.927	1217.07	5.94667	63.6433	3.41986	4.41947e-288	1.16722e-285	Aradu.H5GLI	Plant basic secretory protein (BSP) family protein	-	-	-	-	-	-	-
Aradu.H642L	477.737	2335.23	15.4633	68.8967	2.15558	3.52562e-104	1.89446e-102	Aradu.H642L	PREDICTED: tonoplast dicarboxylate transporter-like	GO:0016020//membrane	GO:0005215//transporter activity	GO:0051234//establishment of localization;GO:0030001//metal ion transport;GO:0055085//transmembrane transport;GO:0015672//monovalent inorganic cation transport;GO:0009987//cellular process;GO:0044765//single-organism transport;GO:0006811//ion transport;GO:0006814//sodium ion transport;GO:0044699//single-organism process;GO:0006810//transport;GO:1902578//single-organism localization;GO:0044763//si…	-	-	-	-
Aradu.H65EF	7.32333	1	0.883333	0.106667	-3.04985	0.000246513	0.000759464	Aradu.H65EF	ribonucleoside-diphosphate reductase LC chr8:38670074-38669019 20130731	-	-	GO:0009058//biosynthetic process;GO:0006260//DNA replication;GO:0044237//cellular metabolic process;GO:0071704//organic substance metabolic process;GO:0090304//nucleic acid metabolic process;GO:0006807//nitrogen compound metabolic process;GO:0008152//metabolic process;GO:0009987//cellular process;GO:0044260//cellular macromolecule metabolic process;GO:0034641//cellular nitrogen compound metabolic…	Metabolism	Nucleotide metabolism;Metabolism of other amino acids	ko00230//Purine metabolism;ko00240//Pyrimidine metabolism;ko00480//Glutathione metabolism	K10807
Aradu.H6JMG	7.66667	37.33	0.73	3.26667	2.16185	1.98058e-10	1.11172e-09	Aradu.H6JMG	Coiled-coil domain-containing protein 18, putative isoform 1 n	-	-	-	-	-	-	-
Aradu.H7DF4	3587.13	48790.2	162.243	2031.69	3.64645	0	0	Aradu.H7DF4	PREDICTED: chalcone synthase	-	GO:0003824//catalytic activity	GO:0008152//metabolic process;GO:0009058//biosynthetic process	Organismal Systems;Metabolism	Environmental adaptation;Biosynthesis of other secondary metabolites	ko04712//Circadian rhythm - plant;ko00941//Flavonoid biosynthesis	K00660
Aradu.H7KMA	24.7467	6.56	0.53	0.13	-2.02748	6.0587e-08	2.79181e-07	Aradu.H7KMA	PREDICTED: protein IQ-DOMAIN 1-like isoform X4	-	GO:0005488//binding;GO:0005515//protein binding	-	-	-	-	-
Aradu.H7S2P	67.3333	503.333	14.29	97.3833	2.76867	3.20572e-106	1.78955e-104	Aradu.H7S2P	unknown protein	-	-	-	-	-	-	-
Aradu.H8Z7K	3478.64	471.263	174.927	21.3533	-3.03422	4.54078e-100	2.35847e-98	Aradu.H8Z7K	PREDICTED: probable 2-oxoglutarate/Fe(II)-dependent dioxygenase-like	-	GO:0016491//oxidoreductase activity;GO:0003824//catalytic activity	GO:0044710//single-organism metabolic process;GO:0055114//oxidation-reduction process;GO:0044699//single-organism process;GO:0008152//metabolic process	-	-	-	-
Aradu.H92KN	9	41.61	0.713333	3.05333	2.09774	1.47343e-12	9.56507e-12	Aradu.H92KN	Disease resistance-responsive (dirigent-like protein) family protein	-	-	-	-	-	-	-
Aradu.H92LC	3148.12	301.147	235.657	20.65	-3.51247	4.03457e-215	6.31005e-213	Aradu.H92LC	PREDICTED: probable 2-oxoglutarate/Fe(II)-dependent dioxygenase-like	-	GO:0003824//catalytic activity;GO:0016491//oxidoreductase activity	GO:0044710//single-organism metabolic process;GO:0044699//single-organism process;GO:0008152//metabolic process;GO:0055114//oxidation-reduction process	-	-	-	-
Aradu.H9IK5	1100.48	13050.2	77.1033	841.723	3.44848	0	0	Aradu.H9IK5	PREDICTED: chalcone synthase	-	GO:0003824//catalytic activity	GO:0008152//metabolic process;GO:0009058//biosynthetic process	Metabolism;Organismal Systems	Environmental adaptation;Biosynthesis of other secondary metabolites	ko04712//Circadian rhythm - plant;ko00941//Flavonoid biosynthesis	K00660
Aradu.H9LWJ	33.53	4.77	0.69	0.09	-2.9386	2.42893e-14	1.75776e-13	Aradu.H9LWJ	Light-sensor Protein kinase n	GO:0016020//membrane	GO:0032550//purine ribonucleoside binding;GO:0032559//adenyl ribonucleotide binding;GO:1901363//heterocyclic compound binding;GO:0032553//ribonucleotide binding;GO:0000166//nucleotide binding;GO:0005515//protein binding;GO:0001882//nucleoside binding;GO:0016740//transferase activity;GO:0043168//anion binding;GO:0016772//transferase activity, transferring phosphorus-containing groups;GO:0030554//a…	GO:0044267//cellular protein metabolic process;GO:0009416//response to light stimulus;GO:0018298//protein-chromophore linkage;GO:0044260//cellular macromolecule metabolic process;GO:0009584//detection of visible light;GO:0044699//single-organism process;GO:0008152//metabolic process;GO:0051716//cellular response to stimulus;GO:0009605//response to external stimulus;GO:0009581//detection of extern…	-	-	-	-
Aradu.H9U8I	18.69	2771.97	0.936667	129.98	7.11654	0	0	Aradu.H9U8I	ethylene-responsive transcription factor	-	GO:1901363//heterocyclic compound binding;GO:0003676//nucleic acid binding;GO:0005488//binding;GO:0001071//nucleic acid binding transcription factor activity;GO:0097159//organic cyclic compound binding;GO:0003700//sequence-specific DNA binding transcription factor activity;GO:0003677//DNA binding	-	-	-	-	-
Aradu.H9WXZ	98.0867	446.483	12.1267	50.4	2.05524	2.24835e-73	7.79007e-72	Aradu.H9WXZ	maternal effect embryo arrest 14	-	-	-	-	-	-	-
Aradu.HB26F	20.6267	4.68333	0.63	0.126667	-2.31431	1.57721e-06	6.3395e-06	Aradu.HB26F	PREDICTED: protein PLASTID MOVEMENT IMPAIRED 2-like isoform X3	-	-	-	-	-	-	-
Aradu.HB8K6	37.38	9.33333	1.85	0.433333	-2.09398	6.70574e-11	3.88918e-10	Aradu.HB8K6	E2F transcription factor 3	GO:0005623//cell;GO:0043234//protein complex;GO:0005622//intracellular;GO:0044424//intracellular part;GO:0005667//transcription factor complex;GO:0032991//macromolecular complex;GO:0044464//cell part	GO:0001071//nucleic acid binding transcription factor activity;GO:0003700//sequence-specific DNA binding transcription factor activity	-	-	-	-	-
Aradu.HBL25	337.463	19.55	26.4533	1.42	-4.21949	9.22495e-153	8.53743e-151	Aradu.HBL25	Sugar transporter SWEET n	GO:0016021//integral component of membrane;GO:0044425//membrane part;GO:0031224//intrinsic component of membrane;GO:0016020//membrane	-	-	-	-	-	-
Aradu.HBW34	79	8.33333	10.2833	0.97	-3.40618	2.19791e-36	3.58159e-35	Aradu.HBW34	PREDICTED: GTP-binding nuclear protein Ran-3	GO:0044464//cell part;GO:0005622//intracellular;GO:0005623//cell;GO:0016020//membrane	GO:0032550//purine ribonucleoside binding;GO:0043168//anion binding;GO:0032549//ribonucleoside binding;GO:0016817//hydrolase activity, acting on acid anhydrides;GO:0016787//hydrolase activity;GO:0000166//nucleotide binding;GO:0035639//purine ribonucleoside triphosphate binding;GO:0001882//nucleoside binding;GO:0005525//GTP binding;GO:0001883//purine nucleoside binding;GO:0017076//purine nucleotid…	GO:0015031//protein transport;GO:0045184//establishment of protein localization;GO:0046907//intracellular transport;GO:0007165//signal transduction;GO:0044699//single-organism process;GO:0051179//localization;GO:0051169//nuclear transport;GO:0006913//nucleocytoplasmic transport;GO:0023052//signaling;GO:0044763//single-organism cellular process;GO:0006810//transport;GO:0051641//cellular localizati…	Cellular Processes	Transport and catabolism	ko04144//Endocytosis	K07901
Aradu.HCH1H	16.2667	138.27	0.623333	4.82667	2.95295	2.67745e-47	5.74159e-46	Aradu.HCH1H	UDP-Glycosyltransferase superfamily protein	-	-	GO:0008152//metabolic process	-	-	-	-
Aradu.HCK7Q	4.69	21.29	0.36	1.50667	2.06529	8.43038e-07	3.47999e-06	Aradu.HCK7Q	PREDICTED: uncharacterized protein LOC100784357 isoform X2	-	-	-	-	-	-	-
Aradu.HES8F	7.11	0.666667	0.256667	0.0266667	-3.26679	0.00034838	0.00104979	Aradu.HES8F	Flavin-binding monooxygenase family protein	-	GO:0043168//anion binding;GO:0000166//nucleotide binding;GO:0036094//small molecule binding;GO:0003824//catalytic activity;GO:1901363//heterocyclic compound binding;GO:0005488//binding;GO:0043167//ion binding;GO:0050661//NADP binding;GO:0048037//cofactor binding;GO:0016491//oxidoreductase activity;GO:0050662//coenzyme binding;GO:0050660//flavin adenine dinucleotide binding;GO:1901265//nucleoside …	GO:0044699//single-organism process;GO:0008152//metabolic process;GO:0044710//single-organism metabolic process;GO:0055114//oxidation-reduction process	Metabolism	Amino acid metabolism	ko00380//Tryptophan metabolism	K11816
Aradu.HF3LG	1	36.7067	0.0266667	0.913333	5.09803	3.96203e-24	4.44833e-23	Aradu.HF3LG	PREDICTED: serine/threonine-protein phosphatase 7 long form homolog	-	GO:0003824//catalytic activity	GO:0008152//metabolic process	Metabolism;Cellular Processes	Transport and catabolism;Lipid metabolism;Amino acid metabolism;Global and Overview	ko04146//Peroxisome;ko01212//Fatty acid metabolism;ko00071//Fatty acid degradation;ko00280//Valine, leucine and isoleucine degradation;ko00592//alpha-Linolenic acid metabolism;ko01040//Biosynthesis of unsaturated fatty acids	K07513
Aradu.HH2HB	24.6433	5.33333	0.836667	0.17	-2.29912	8.73063e-10	4.67607e-09	Aradu.HH2HB	receptor-like protein kinase 2	-	GO:0005515//protein binding;GO:0005488//binding	-	-	-	-	-
Aradu.HH99D	1748.21	9311.39	79.5433	388.367	2.28761	2.07018e-200	2.89056e-198	Aradu.HH99D	formate dehydrogenase	-	GO:0051287//NAD binding;GO:1901265//nucleoside phosphate binding;GO:1901363//heterocyclic compound binding;GO:0097159//organic cyclic compound binding;GO:0005488//binding;GO:0048037//cofactor binding;GO:0036094//small molecule binding;GO:0000166//nucleotide binding;GO:0050662//coenzyme binding	GO:0008152//metabolic process;GO:0044699//single-organism process;GO:0055114//oxidation-reduction process;GO:0044710//single-organism metabolic process	Metabolism	Global and Overview;Carbohydrate metabolism	ko01200//Carbon metabolism;ko00630//Glyoxylate and dicarboxylate metabolism	K00122
Aradu.HHL1H	6.67667	33.3367	0.0933333	0.423333	2.18133	7.49473e-10	4.03731e-09	Aradu.HHL1H	DNA-directed RNA polymerase	-	GO:1901363//heterocyclic compound binding;GO:0003824//catalytic activity;GO:0003899//DNA-directed RNA polymerase activity;GO:0005488//binding;GO:0016779//nucleotidyltransferase activity;GO:0034062//RNA polymerase activity;GO:0003677//DNA binding;GO:0097159//organic cyclic compound binding;GO:0016772//transferase activity, transferring phosphorus-containing groups;GO:0003676//nucleic acid binding;…	-	Genetic Information Processing;Metabolism	Nucleotide metabolism;Transcription	ko00230//Purine metabolism;ko00240//Pyrimidine metabolism;ko03020//RNA polymerase	K03006
Aradu.HJ002	5.99333	73.0433	0.186667	2.10333	3.49414	3.59568e-29	4.80605e-28	Aradu.HJ002	peptide transporter 1	GO:0016020//membrane	GO:0005215//transporter activity	GO:0006810//transport;GO:0051179//localization;GO:0051234//establishment of localization	-	-	-	-
Aradu.HK5Y3	24.74	239.103	1.03667	9.36333	3.17507	2.84279e-57	7.43441e-56	Aradu.HK5Y3	3-ketoacyl-CoA synthase 1	GO:0016020//membrane	GO:0003824//catalytic activity	GO:0044238//primary metabolic process;GO:0006629//lipid metabolic process;GO:0006631//fatty acid metabolic process;GO:1901576//organic substance biosynthetic process;GO:0019752//carboxylic acid metabolic process;GO:0044237//cellular metabolic process;GO:0008610//lipid biosynthetic process;GO:0044283//small molecule biosynthetic process;GO:0009987//cellular process;GO:0043436//oxoacid metabolic pr…	Metabolism	Lipid metabolism	ko00062//Fatty acid elongation	K15397
Aradu.HLM3M	232.57	43.5267	9.98667	1.69	-2.56298	1.6983e-70	5.62659e-69	Aradu.HLM3M	PREDICTED: protein COBRA	GO:0044425//membrane part;GO:0031225//anchored component of membrane;GO:0016020//membrane;GO:0031224//intrinsic component of membrane	-	GO:0045229//external encapsulating structure organization;GO:0016049//cell growth;GO:0071669//plant-type cell wall organization or biogenesis;GO:0071555//cell wall organization;GO:0071840//cellular component organization or biogenesis;GO:0030198//extracellular matrix organization;GO:0043062//extracellular structure organization;GO:0009832//plant-type cell wall biogenesis;GO:0071668//plant-type ce…	-	-	-	-
Aradu.HM5XS	99.6667	24.6667	6.56667	1.49333	-2.13662	8.72912e-30	1.18918e-28	Aradu.HM5XS	Protein of unknown function (DUF1295)	-	-	-	-	-	-	-
Aradu.HN90X	661.603	157.263	13.7933	3.02	-2.19135	4.14006e-115	2.55574e-113	Aradu.HN90X	PREDICTED: F-box protein At2g16365-like isoform X3	-	-	-	-	-	-	-
Aradu.HPW18	18.5733	2.33333	0.636667	0.07	-3.18511	2.34091e-08	1.11834e-07	Aradu.HPW18	Unknown protein	-	-	-	Metabolism	Metabolism of other amino acids	ko00480//Glutathione metabolism	K00799
Aradu.HQ5WT	0.666667	40.59	0.06	3.19	5.73245	2.66202e-24	3.01171e-23	Aradu.HQ5WT	Translation initiation factor SUI1 family protein	-	GO:0097159//organic cyclic compound binding;GO:0005488//binding;GO:0003743//translation initiation factor activity;GO:1901363//heterocyclic compound binding;GO:0003676//nucleic acid binding;GO:0008135//translation factor activity, RNA binding;GO:0003723//RNA binding	GO:0008152//metabolic process;GO:0006412//translation;GO:0010467//gene expression;GO:0044237//cellular metabolic process;GO:0034645//cellular macromolecule biosynthetic process;GO:0009987//cellular process;GO:0043170//macromolecule metabolic process;GO:0044238//primary metabolic process;GO:0006413//translational initiation;GO:0009058//biosynthetic process;GO:1901576//organic substance biosyntheti…	Genetic Information Processing	Translation	ko03013//RNA transport	K03113
Aradu.HQT4J	2364.48	397.987	106.827	16.4667	-2.69765	9.74306e-192	1.25987e-189	Aradu.HQT4J	ferric reduction oxidase 2	-	GO:0003824//catalytic activity;GO:0016491//oxidoreductase activity	GO:0055114//oxidation-reduction process;GO:0044710//single-organism metabolic process;GO:0044699//single-organism process;GO:0008152//metabolic process	-	-	-	-
Aradu.HRR2H	8.14	1	0.793333	0.0966667	-3.03684	6.43861e-05	0.00021479	Aradu.HRR2H	xyloglucan endotransglucosylase/hydrolase 26	GO:0005623//cell;GO:0005576//extracellular region;GO:0071944//cell periphery;GO:0005618//cell wall;GO:0044464//cell part;GO:0048046//apoplast;GO:0030312//external encapsulating structure	GO:0016757//transferase activity, transferring glycosyl groups;GO:0016758//transferase activity, transferring hexosyl groups;GO:0016740//transferase activity;GO:0003824//catalytic activity;GO:0016762//xyloglucan:xyloglucosyl transferase activity	GO:0008152//metabolic process;GO:0044262//cellular carbohydrate metabolic process;GO:0071704//organic substance metabolic process;GO:0043170//macromolecule metabolic process;GO:0044042//glucan metabolic process;GO:0006073//cellular glucan metabolic process;GO:0009987//cellular process;GO:0044260//cellular macromolecule metabolic process;GO:0044238//primary metabolic process;GO:0044264//cellular p…	-	-	-	-
Aradu.HT3CH	6.81667	0.443333	0.216667	0.01	-4.43741	1.71947e-05	6.15648e-05	Aradu.HT3CH	nucleobase-ascorbate transporter 7	GO:0016020//membrane	GO:0005215//transporter activity	GO:0044763//single-organism cellular process;GO:0051234//establishment of localization;GO:0009987//cellular process;GO:1902578//single-organism localization;GO:0051179//localization;GO:0055085//transmembrane transport;GO:0044699//single-organism process;GO:0006810//transport;GO:0044765//single-organism transport	-	-	-	-
Aradu.HV4ZQ	10.2667	2	0.976667	0.186667	-2.3874	0.000172906	0.000544008	Aradu.HV4ZQ	ATP-dependent RNA helicase	-	-	-	Genetic Information Processing	Folding, sorting and degradation	ko03018//RNA degradation	K14442
Aradu.HXS06	6.28	45.3	0.526667	3.43	2.70325	9.64247e-15	7.13104e-14	Aradu.HXS06	Carbohydrate kinase, thermoresistant glucokinase family n	-	GO:0003824//catalytic activity;GO:0016301//kinase activity;GO:0016740//transferase activity;GO:0016772//transferase activity, transferring phosphorus-containing groups	GO:0071704//organic substance metabolic process;GO:0044238//primary metabolic process;GO:0005975//carbohydrate metabolic process;GO:0008152//metabolic process	Metabolism	Carbohydrate metabolism;Global and Overview	ko01200//Carbon metabolism;ko00030//Pentose phosphate pathway	K00851
Aradu.HY1A1	42.4533	7.88	10.4467	1.85667	-2.49226	1.03146e-10	5.91301e-10	Aradu.HY1A1	Calcium-dependent lipid-binding (CaLB domain) family protein	-	GO:0005488//binding;GO:0005515//protein binding	-	-	-	-	-
Aradu.HZI51	6	157.667	0.466667	11.4433	4.61597	4.95476e-62	1.42634e-60	Aradu.HZI51	LOB domain-containing protein 11	-	-	-	-	-	-	-
Aradu.I0WQG	64	10.3333	4.53	0.68	-2.7359	4.18352e-26	5.03957e-25	Aradu.I0WQG	PREDICTED: protein UPSTREAM OF FLC-like isoform X2	-	-	-	-	-	-	-
Aradu.I118N	1	7	0.03	0.163333	2.44478	0.00107435	0.00300184	Aradu.I118N	p-hydroxybenzoic acid efflux pump subunit aaeB n	-	-	-	-	-	-	-
Aradu.I1CLH	8.66667	98	0.483333	4.99667	3.36988	6.28216e-29	8.34903e-28	Aradu.I1CLH	Chaperone DnaJ-domain superfamily protein	-	-	-	-	-	-	-
Aradu.I1U3H	59.9767	14.6467	4.91667	1.11	-2.14712	2.20066e-17	1.86073e-16	Aradu.I1U3H	Core-2/I-branching beta-1,6-N-acetylglucosaminyltransferase family protein	GO:0016020//membrane	GO:0016757//transferase activity, transferring glycosyl groups;GO:0008375//acetylglucosaminyltransferase activity;GO:0016740//transferase activity;GO:0008194//UDP-glycosyltransferase activity;GO:0003824//catalytic activity;GO:0016758//transferase activity, transferring hexosyl groups	-	-	-	-	-
Aradu.I2US6	45.7233	241.383	1.82	8.91	2.29149	2.65109e-57	6.93955e-56	Aradu.I2US6	RING/FYVE/PHD zinc finger superfamily protein	-	GO:0005488//binding;GO:0043167//ion binding;GO:0008270//zinc ion binding;GO:0043169//cation binding;GO:0046914//transition metal ion binding;GO:0046872//metal ion binding	-	-	-	-	-
Aradu.I3W5K	4.78333	0.663333	0.163333	0.0233333	-2.80735	0.00373383	0.00949628	Aradu.I3W5K	PREDICTED: serine/threonine-protein phosphatase 7 long form homolog	-	-	-	-	-	-	-
Aradu.I4E8B	12.9067	1.33333	0.786667	0.0766667	-3.35908	8.67881e-07	3.57673e-06	Aradu.I4E8B	PREDICTED: RNA-binding protein 42-like	-	GO:0036094//small molecule binding;GO:0097159//organic cyclic compound binding;GO:0000166//nucleotide binding;GO:0003676//nucleic acid binding;GO:1901265//nucleoside phosphate binding;GO:1901363//heterocyclic compound binding;GO:0005488//binding	-	Genetic Information Processing	Folding, sorting and degradation;Translation	ko03013//RNA transport;ko03015//mRNA surveillance pathway;ko03018//RNA degradation	K13126
Aradu.I4TMG	1212.5	191.333	139.523	20.25	-2.78451	1.39975e-225	2.36778e-223	Aradu.I4TMG	FASCICLIN-like arabinogalactan-protein 12	-	-	-	-	-	-	-
Aradu.I4VKL	23.66	266.107	1.08333	11.02	3.34658	1.17362e-96	5.79986e-95	Aradu.I4VKL	hydrolase family protein / HAD-superfamily protein	-	-	-	-	-	-	-
Aradu.I5LRV	40.29	7.61333	2.61	0.453333	-2.52541	4.36639e-17	3.64567e-16	Aradu.I5LRV	NADP-dependent alkenal double bond reductase P1	-	GO:0016491//oxidoreductase activity;GO:0046914//transition metal ion binding;GO:0003824//catalytic activity;GO:0043167//ion binding;GO:0005488//binding;GO:0046872//metal ion binding;GO:0043169//cation binding;GO:0008270//zinc ion binding	GO:0008152//metabolic process;GO:0055114//oxidation-reduction process;GO:0044710//single-organism metabolic process;GO:0044699//single-organism process	-	-	-	-
Aradu.I64P1	5	0.333333	0.106667	0.00666667	-4	0.00302111	0.0078251	Aradu.I64P1	ATP-binding ABC transporter	-	GO:0005488//binding;GO:0016817//hydrolase activity, acting on acid anhydrides;GO:0016818//hydrolase activity, acting on acid anhydrides, in phosphorus-containing anhydrides;GO:0035639//purine ribonucleoside triphosphate binding;GO:0097367//carbohydrate derivative binding;GO:0005524//ATP binding;GO:0043168//anion binding;GO:0001882//nucleoside binding;GO:0003824//catalytic activity;GO:1901363//het…	-	-	-	-	-
Aradu.I66GQ	3074	417.333	122.9	15.49	-2.98808	1.31504e-92	6.15123e-91	Aradu.I66GQ	Peroxidase superfamily protein	-	GO:0004601//peroxidase activity;GO:0003824//catalytic activity;GO:0016491//oxidoreductase activity;GO:0097159//organic cyclic compound binding;GO:0046906//tetrapyrrole binding;GO:0005488//binding;GO:0020037//heme binding;GO:0016209//antioxidant activity;GO:1901363//heterocyclic compound binding;GO:0016684//oxidoreductase activity, acting on peroxide as acceptor	GO:0055114//oxidation-reduction process;GO:0044699//single-organism process;GO:0006950//response to stress;GO:0044710//single-organism metabolic process;GO:0050896//response to stimulus;GO:0006979//response to oxidative stress;GO:0008152//metabolic process	Metabolism	Biosynthesis of other secondary metabolites	ko00940//Phenylpropanoid biosynthesis	K00430
Aradu.I6GSC	5.76667	430.877	0.243333	16.6567	6.09702	1.15165e-208	1.68361e-206	Aradu.I6GSC	Transmembrane amino acid transporter family protein	-	-	-	-	-	-	-
Aradu.I73XP	1.33333	8.76333	0.0566667	0.35	2.62678	0.000163437	0.000515956	Aradu.I73XP	PREDICTED: probable glycosyltransferase At5g03795-like	-	-	-	-	-	-	-
Aradu.I7P5X	13	79	0.74	4.22333	2.51278	2.75126e-24	3.11015e-23	Aradu.I7P5X	PREDICTED: uncharacterized protein LOC100811367	-	-	-	-	-	-	-
Aradu.I88HR	20	4.33333	0.816667	0.166667	-2.29278	2.90691e-08	1.37898e-07	Aradu.I88HR	transmembrane amino acid transporter family protein	-	-	-	-	-	-	-
Aradu.I8GKQ	50.1867	368.043	3.56	24.0533	2.75629	6.85583e-94	3.25862e-92	Aradu.I8GKQ	WRKY family transcription factor	-	GO:0043565//sequence-specific DNA binding;GO:0005488//binding;GO:0003676//nucleic acid binding;GO:0001071//nucleic acid binding transcription factor activity;GO:0003677//DNA binding;GO:0003700//sequence-specific DNA binding transcription factor activity;GO:1901363//heterocyclic compound binding;GO:0097159//organic cyclic compound binding	-	-	-	-	-
Aradu.I8P7S	6.73333	43.71	0.33	2.00333	2.60186	2.73313e-13	1.85424e-12	Aradu.I8P7S	PREDICTED: probable pectinesterase/pectinesterase inhibitor 17-like	GO:0005618//cell wall;GO:0005623//cell;GO:0044464//cell part;GO:0030312//external encapsulating structure;GO:0071944//cell periphery	GO:0098772//molecular function regulator;GO:0030599//pectinesterase activity;GO:0052689//carboxylic ester hydrolase activity;GO:0016787//hydrolase activity;GO:0016788//hydrolase activity, acting on ester bonds;GO:0004857//enzyme inhibitor activity;GO:0030234//enzyme regulator activity;GO:0003824//catalytic activity	GO:0071554//cell wall organization or biogenesis;GO:0042545//cell wall modification;GO:0071555//cell wall organization;GO:0045229//external encapsulating structure organization;GO:0016043//cellular component organization;GO:0071840//cellular component organization or biogenesis;GO:0009987//cellular process	Metabolism	Carbohydrate metabolism	ko00500//Starch and sucrose metabolism;ko00040//Pentose and glucuronate interconversions	K01051
Aradu.I9K2A	56.5933	453.17	1.61667	11.7567	2.86238	5.84669e-105	3.20002e-103	Aradu.I9K2A	O-methyltransferase family protein	-	GO:0016740//transferase activity;GO:0008171//O-methyltransferase activity;GO:0005515//protein binding;GO:0008168//methyltransferase activity;GO:0003824//catalytic activity;GO:0005488//binding;GO:0016741//transferase activity, transferring one-carbon groups;GO:0046983//protein dimerization activity	-	Metabolism	Biosynthesis of other secondary metabolites	ko00943//Isoflavonoid biosynthesis	K13262
Aradu.I9TTZ	0	13.6667	0.001	1.13667	10.1506	2.22763e-11	1.34e-10	Aradu.I9TTZ	ethylene-responsive transcription factor 1B	-	GO:0003677//DNA binding;GO:0097159//organic cyclic compound binding;GO:0005488//binding;GO:0001071//nucleic acid binding transcription factor activity;GO:0003700//sequence-specific DNA binding transcription factor activity;GO:0003676//nucleic acid binding;GO:1901363//heterocyclic compound binding	-	-	-	-	-
Aradu.IBG9B	0.666667	18.3333	0.69	17.1433	4.63491	6.54285e-12	4.07997e-11	Aradu.IBG9B	PREDICTED: lanC-like protein 2-like isoform X3	-	-	-	-	-	-	-
Aradu.IC1L6	11.3333	146.667	1.31	15.7067	3.58374	3.3333e-56	8.53382e-55	Aradu.IC1L6	MYB transcription factor MYB98	-	GO:0003677//DNA binding;GO:0044877//macromolecular complex binding;GO:0003676//nucleic acid binding;GO:0003682//chromatin binding;GO:0097159//organic cyclic compound binding;GO:1901363//heterocyclic compound binding;GO:0005488//binding	-	-	-	-	-
Aradu.IC47R	2.31333	17.1633	0.113333	0.8	2.81943	4.10627e-07	1.74574e-06	Aradu.IC47R	photosystem II CP47 chlorophyll A apoprotein	GO:0005623//cell;GO:0043234//protein complex;GO:0009521//photosystem;GO:0044425//membrane part;GO:0044464//cell part;GO:0005622//intracellular;GO:0016020//membrane;GO:0044436//thylakoid part;GO:0009579//thylakoid;GO:0009523//photosystem II;GO:0034357//photosynthetic membrane;GO:0032991//macromolecular complex;GO:0044424//intracellular part	GO:1901363//heterocyclic compound binding;GO:0097159//organic cyclic compound binding;GO:0005488//binding;GO:0046906//tetrapyrrole binding;GO:0016168//chlorophyll binding	GO:0008152//metabolic process;GO:0009987//cellular process;GO:0015979//photosynthesis;GO:0044699//single-organism process;GO:0044237//cellular metabolic process;GO:0019684//photosynthesis, light reaction;GO:0044710//single-organism metabolic process;GO:0009767//photosynthetic electron transport chain;GO:0055114//oxidation-reduction process;GO:0044763//single-organism cellular process;GO:0022900//…	Metabolism	Energy metabolism	ko00195//Photosynthesis	K02704
Aradu.IC95M	0.666667	6.33333	0.0733333	0.663333	3.17719	0.00057135	0.00166678	Aradu.IC95M	PREDICTED: auxin response factor 1-like isoform X2	GO:0005623//cell;GO:0043226//organelle;GO:0043227//membrane-bounded organelle;GO:0044424//intracellular part;GO:0043231//intracellular membrane-bounded organelle;GO:0005622//intracellular;GO:0044464//cell part;GO:0043229//intracellular organelle;GO:0005634//nucleus	-	-	Environmental Information Processing	Signal transduction	ko04075//Plant hormone signal transduction	K14484
Aradu.IDD64	10.3467	2.75	0.243333	0.0566667	-2.10236	0.000427501	0.00126956	Aradu.IDD64	Unknown protein	-	-	-	-	-	-	-
Aradu.IDZ6J	10.3433	2	2.75333	0.51	-2.43261	0.000114465	0.000369779	Aradu.IDZ6J	Unknown protein	-	-	-	-	-	-	-
Aradu.IEK57	8.17	111.28	0.276667	3.47667	3.65148	1.17746e-51	2.7504e-50	Aradu.IEK57	tyrosine aminotransferase 3	-	GO:0003824//catalytic activity;GO:0043168//anion binding;GO:0016740//transferase activity;GO:1901363//heterocyclic compound binding;GO:0016769//transferase activity, transferring nitrogenous groups;GO:0097159//organic cyclic compound binding;GO:0005488//binding;GO:0008483//transaminase activity;GO:0030170//pyridoxal phosphate binding;GO:0043167//ion binding;GO:0048037//cofactor binding	GO:0044763//single-organism cellular process;GO:0043436//oxoacid metabolic process;GO:0044281//small molecule metabolic process;GO:0008152//metabolic process;GO:0071704//organic substance metabolic process;GO:0006807//nitrogen compound metabolic process;GO:0019752//carboxylic acid metabolic process;GO:0009987//cellular process;GO:0006082//organic acid metabolic process;GO:0009058//biosynthetic pr…	Metabolism	Metabolism of cofactors and vitamins;Biosynthesis of other secondary metabolites;Global and Overview;Amino acid metabolism	ko01230//Biosynthesis of amino acids;ko00270//Cysteine and methionine metabolism;ko00130//Ubiquinone and other terpenoid-quinone biosynthesis;ko00400//Phenylalanine, tyrosine and tryptophan biosynthesis;ko00350//Tyrosine metabolism;ko00360//Phenylalanine metabolism;ko00960//Tropane, piperidine and pyridine alkaloid biosynthesis;ko00950//Isoquinoline alkaloid biosynthesis	K00815
Aradu.IEX64	3864.81	800.213	271.243	50.9	-2.41385	1.97297e-129	1.42909e-127	Aradu.IEX64	2-oxoglutarate (2OG) and Fe(II)-dependent oxygenase superfamily protein	-	GO:0003824//catalytic activity;GO:0016491//oxidoreductase activity	GO:0044699//single-organism process;GO:0055114//oxidation-reduction process;GO:0008152//metabolic process;GO:0044710//single-organism metabolic process	-	-	-	-
Aradu.IFC7W	70	562.997	10.49	77.6967	2.88884	4.33079e-125	2.97893e-123	Aradu.IFC7W	phytosulfokine 5 precursor	GO:0005576//extracellular region	GO:0005488//binding;GO:0005515//protein binding;GO:0005102//receptor binding;GO:0008083//growth factor activity	GO:0008283//cell proliferation;GO:0044699//single-organism process	-	-	-	-
Aradu.IFW71	0.666667	12	0.03	0.466667	3.95936	2.88938e-06	1.12982e-05	Aradu.IFW71	PREDICTED: cysteine-rich receptor-like protein kinase 10-like	-	-	-	-	-	-	-
Aradu.IG775	7.29	0.333333	0.606667	0.0233333	-4.70044	1.80928e-05	6.45654e-05	Aradu.IG775	PREDICTED: uncharacterized protein LOC100776355	-	-	-	-	-	-	-
Aradu.IJ2A2	1	9.33333	0.436667	3.66	3.06724	0.000105012	0.000341031	Aradu.IJ2A2	VQ motif protein	-	-	-	-	-	-	-
Aradu.IJ8ZV	3.72	0	0.13	0.001	-7.02237	0.000646187	0.00186893	Aradu.IJ8ZV	PREDICTED: serine/threonine-protein phosphatase 7 long form homolog	-	-	-	-	-	-	-
Aradu.ILB9Z	25.3333	977.043	1.88667	66.6667	5.14305	0	0	Aradu.ILB9Z	1-aminocyclopropane-1-carboxylate oxidase	-	GO:0003824//catalytic activity;GO:0016491//oxidoreductase activity	GO:0055114//oxidation-reduction process;GO:0008152//metabolic process;GO:0044710//single-organism metabolic process;GO:0044699//single-organism process	Metabolism	Amino acid metabolism	ko00270//Cysteine and methionine metabolism	K05933
Aradu.IM707	2	28.03	0.0433333	0.553333	3.6746	1.10815e-11	6.7929e-11	Aradu.IM707	Protein kinase family protein	-	GO:0016740//transferase activity;GO:0016773//phosphotransferase activity, alcohol group as acceptor;GO:0016301//kinase activity;GO:0016772//transferase activity, transferring phosphorus-containing groups;GO:0003824//catalytic activity;GO:0004672//protein kinase activity	GO:0016310//phosphorylation;GO:0044237//cellular metabolic process;GO:0006464//cellular protein modification process;GO:0036211//protein modification process;GO:0006796//phosphate-containing compound metabolic process;GO:0019538//protein metabolic process;GO:0071704//organic substance metabolic process;GO:0044238//primary metabolic process;GO:0044260//cellular macromolecule metabolic process;GO:0…	-	-	-	-
[truncated: 2,521 more rows]
