# Supplementary material for: Comparative Transcriptome Analysis Reveals Molecular Defensive Mechanism of Arachis hypogaea in Response to Salt Stress
Source: Int J Genomics. 2020 Feb 26;2020:6524093. doi: 10.1155/2020/6524093 (PMC7063224; doi:10.1155/2020/6524093)
Supplement: Supplementary 2 — Supplementary Table S2: the differentially expressed TFs identified in response to salt tolerance. [file 6524093.f2.xlsx]

## Sheet: Sheet1
Gene ID	CKR_count	HSR_count	CKR	HSR	logFC	Pvalue	FDR	Symbol	Description	TF family	GO Component	GO Function	GO Process	KEGG_A_class	KEGG_B_class	Pathway	K_ID
Araip.VY42Y	1.66667	9.66667	0.163333	0.883333	2.43514	0.000197465	0.000615878	Araip.VY42Y	AP2-like ethylene-responsive transcription factor	AP2/ERF	-	-	-	-	-	-	-
Aradu.LT83G	8.33333	1	0.906667	0.113333	-3	3.32999e-05	0.000115014	Aradu.LT83G	AP2-like ethylene-responsive transcription factor	AP2/ERF	-	GO:0003677//DNA binding;GO:0003676//nucleic acid binding;GO:0001071//nucleic acid binding transcription factor activity;GO:0003700//sequence-specific DNA binding transcription factor activity;GO:1901363//heterocyclic compound binding;GO:0005488//binding;GO:0097159//organic cyclic compound binding	-	-	-	-	-
Aradu.H9U8I	18.69	2771.97	0.936667	129.98	7.11654	0	0	Aradu.H9U8I	ethylene-responsive transcription factor	AP2/ERF	-	GO:1901363//heterocyclic compound binding;GO:0003676//nucleic acid binding;GO:0005488//binding;GO:0001071//nucleic acid binding transcription factor activity;GO:0097159//organic cyclic compound binding;GO:0003700//sequence-specific DNA binding transcription factor activity;GO:0003677//DNA binding	-	-	-	-	-
Aradu.JL25Y	2.33333	346	0.246667	32.9367	7.06099	1.22965e-170	1.31643e-168	Aradu.JL25Y	ethylene-responsive transcription factor 1B	AP2/ERF	-	GO:0003676//nucleic acid binding;GO:0003677//DNA binding;GO:0005488//binding;GO:1901363//heterocyclic compound binding;GO:0003700//sequence-specific DNA binding transcription factor activity;GO:0001071//nucleic acid binding transcription factor activity;GO:0097159//organic cyclic compound binding	-	-	-	-	-
Aradu.ME4LN	2.66667	304.327	0.196667	20.46	6.70091	1.10601e-131	8.25686e-130	Aradu.ME4LN	ethylene-responsive transcription factor 1B	AP2/ERF	-	GO:0005488//binding;GO:1901363//heterocyclic compound binding;GO:0003676//nucleic acid binding;GO:0097159//organic cyclic compound binding;GO:0001071//nucleic acid binding transcription factor activity;GO:0003700//sequence-specific DNA binding transcription factor activity;GO:0003677//DNA binding	-	-	-	-	-
Aradu.NK24P	26.6667	171	2.04333	11.85	2.53589	2.3281e-41	4.33785e-40	Aradu.NK24P	ethylene-responsive transcription factor 1B	AP2/ERF	-	GO:0097159//organic cyclic compound binding;GO:0001071//nucleic acid binding transcription factor activity;GO:0003677//DNA binding;GO:0003700//sequence-specific DNA binding transcription factor activity;GO:1901363//heterocyclic compound binding;GO:0005488//binding;GO:0003676//nucleic acid binding	-	-	-	-	-
Araip.3W5AL	3.66667	486.667	0.266667	31.5867	6.88813	7.79107e-219	1.24637e-216	Araip.3W5AL	ethylene-responsive transcription factor 1B	AP2/ERF	-	GO:0005488//binding;GO:0001071//nucleic acid binding transcription factor activity;GO:0097159//organic cyclic compound binding;GO:0003700//sequence-specific DNA binding transcription factor activity;GO:0003677//DNA binding;GO:1901363//heterocyclic compound binding;GO:0003676//nucleic acid binding	-	-	-	-	-
Araip.88WSL	0.666667	173.007	0.06	14.13	7.87958	1.56128e-95	7.60816e-94	Araip.88WSL	ethylene-responsive transcription factor 1B	AP2/ERF	-	GO:0001071//nucleic acid binding transcription factor activity;GO:1901363//heterocyclic compound binding;GO:0003676//nucleic acid binding;GO:0003677//DNA binding;GO:0003700//sequence-specific DNA binding transcription factor activity;GO:0005488//binding;GO:0097159//organic cyclic compound binding	-	-	-	-	-
Araip.KL8NJ	45.6667	275.333	3.02667	16.4733	2.44433	4.0745e-57	1.06307e-55	Araip.KL8NJ	ethylene-responsive transcription factor 1B	AP2/ERF	-	GO:1901363//heterocyclic compound binding;GO:0001071//nucleic acid binding transcription factor activity;GO:0003700//sequence-specific DNA binding transcription factor activity;GO:0005488//binding;GO:0003677//DNA binding;GO:0003676//nucleic acid binding;GO:0097159//organic cyclic compound binding	-	-	-	-	-
Aradu.I9TTZ	0	13.6667	0.001	1.13667	10.1506	2.22763e-11	1.34e-10	Aradu.I9TTZ	ethylene-responsive transcription factor 1B	AP2/ERF	-	GO:0003677//DNA binding;GO:0097159//organic cyclic compound binding;GO:0005488//binding;GO:0001071//nucleic acid binding transcription factor activity;GO:0003700//sequence-specific DNA binding transcription factor activity;GO:0003676//nucleic acid binding;GO:1901363//heterocyclic compound binding	-	-	-	-	-
Aradu.K41I0	137.29	1033.97	10.1467	69.5933	2.77794	1.53122e-138	1.23359e-136	Aradu.K41I0	ethylene-responsive transcription factor 1B	AP2/ERF	-	GO:0005488//binding;GO:0003700//sequence-specific DNA binding transcription factor activity;GO:1901363//heterocyclic compound binding;GO:0003677//DNA binding;GO:0003676//nucleic acid binding;GO:0001071//nucleic acid binding transcription factor activity;GO:0097159//organic cyclic compound binding	-	-	-	-	-
Araip.62IDN	0	12.3333	0.001	1.10667	10.112	1.06261e-10	6.08601e-10	Araip.62IDN	ethylene-responsive transcription factor 1B	AP2/ERF	-	GO:0003700//sequence-specific DNA binding transcription factor activity;GO:0097159//organic cyclic compound binding;GO:0003676//nucleic acid binding;GO:0003677//DNA binding;GO:0005488//binding;GO:0001071//nucleic acid binding transcription factor activity;GO:1901363//heterocyclic compound binding	-	-	-	-	-
Aradu.3R22E	0	11.3333	0.001	1.75	10.7731	8.51483e-10	4.56442e-09	Aradu.3R22E	ethylene-responsive transcription factor 1B	AP2/ERF	-	GO:0003677//DNA binding;GO:0001071//nucleic acid binding transcription factor activity;GO:0003700//sequence-specific DNA binding transcription factor activity;GO:0097159//organic cyclic compound binding;GO:0003676//nucleic acid binding;GO:0005488//binding;GO:1901363//heterocyclic compound binding	-	Environmental Information Processing	Signal transduction	ko04075//Plant hormone signal transduction	K14516
Aradu.B90GQ	30.6633	479.29	9.51333	135.913	3.83659	1.0665e-125	7.41795e-124	Aradu.B90GQ	ethylene-responsive transcription factor 1B	AP2/ERF	-	GO:0003676//nucleic acid binding;GO:0003677//DNA binding;GO:0005488//binding;GO:0001071//nucleic acid binding transcription factor activity;GO:1901363//heterocyclic compound binding;GO:0003700//sequence-specific DNA binding transcription factor activity;GO:0097159//organic cyclic compound binding	-	-	-	-	-
Araip.BUP6F	39	342.667	18.9733	154.297	3.02366	1.02442e-80	4.01107e-79	Araip.BUP6F	ethylene-responsive transcription factor 1B	AP2/ERF	-	GO:0003676//nucleic acid binding;GO:0097159//organic cyclic compound binding;GO:0003677//DNA binding;GO:1901363//heterocyclic compound binding;GO:0003700//sequence-specific DNA binding transcription factor activity;GO:0005488//binding;GO:0001071//nucleic acid binding transcription factor activity	-	-	-	-	-
Araip.T3D3V	28.0033	484.377	8.05333	128.09	3.99143	2.74049e-158	2.67788e-156	Araip.T3D3V	ethylene-responsive transcription factor 1B	AP2/ERF	-	GO:0003700//sequence-specific DNA binding transcription factor activity;GO:1901363//heterocyclic compound binding;GO:0003676//nucleic acid binding;GO:0003677//DNA binding;GO:0005488//binding;GO:0001071//nucleic acid binding transcription factor activity;GO:0097159//organic cyclic compound binding	-	-	-	-	-
Araip.QQN2T	66.3333	430	4.19667	25.03	2.57634	4.20523e-95	2.03154e-93	Araip.QQN2T	ethylene-responsive transcription factor 1B	AP2/ERF	-	GO:0003700//sequence-specific DNA binding transcription factor activity;GO:0097159//organic cyclic compound binding;GO:0003676//nucleic acid binding;GO:0005488//binding;GO:0003677//DNA binding;GO:0001071//nucleic acid binding transcription factor activity;GO:1901363//heterocyclic compound binding	-	-	-	-	-
Aradu.UA79E	119.483	29.5867	6.28667	1.43	-2.13628	3.0026e-35	4.75718e-34	Aradu.UA79E	PREDICTED: AP2-like ethylene-responsive transcription factor ANT-like	AP2/ERF	-	GO:0003677//DNA binding;GO:1901363//heterocyclic compound binding;GO:0003676//nucleic acid binding;GO:0003700//sequence-specific DNA binding transcription factor activity;GO:0097159//organic cyclic compound binding;GO:0001071//nucleic acid binding transcription factor activity;GO:0005488//binding	-	-	-	-	-
Araip.E0UEG	152.85	34.7467	7.10333	1.46333	-2.27924	1.39265e-33	2.12121e-32	Araip.E0UEG	PREDICTED: AP2-like ethylene-responsive transcription factor ANT-like	AP2/ERF	-	GO:0097159//organic cyclic compound binding;GO:0003676//nucleic acid binding;GO:0003700//sequence-specific DNA binding transcription factor activity;GO:0001071//nucleic acid binding transcription factor activity;GO:0005488//binding;GO:0003677//DNA binding;GO:1901363//heterocyclic compound binding	-	-	-	-	-
Araip.0BU95	96.3333	20	11.2367	2.2	-2.35264	3.38265e-16	2.70067e-15	Araip.0BU95	PREDICTED: ethylene-responsive transcription factor 12-like	AP2/ERF	-	GO:0003700//sequence-specific DNA binding transcription factor activity;GO:0003677//DNA binding;GO:0001071//nucleic acid binding transcription factor activity;GO:0003676//nucleic acid binding;GO:0005488//binding;GO:0097159//organic cyclic compound binding;GO:1901363//heterocyclic compound binding	-	-	-	-	-
Araip.Z2VYZ	0.333333	9	0.05	1.14	4.51096	1.09688e-06	4.47146e-06	Araip.Z2VYZ	PREDICTED: ethylene-responsive transcription factor 13-like	AP2/ERF	-	GO:0001071//nucleic acid binding transcription factor activity;GO:0005488//binding;GO:0003700//sequence-specific DNA binding transcription factor activity;GO:0003677//DNA binding;GO:0003676//nucleic acid binding;GO:1901363//heterocyclic compound binding;GO:0097159//organic cyclic compound binding	-	-	-	-	-
Aradu.GB4U4	7	372.663	0.276667	13.5833	5.61754	3.67084e-179	4.22042e-177	Aradu.GB4U4	PREDICTED: ethylene-responsive transcription factor 1A-like	AP2/ERF	-	GO:1901363//heterocyclic compound binding;GO:0003676//nucleic acid binding;GO:0003677//DNA binding;GO:0005488//binding;GO:0003700//sequence-specific DNA binding transcription factor activity;GO:0001071//nucleic acid binding transcription factor activity;GO:0097159//organic cyclic compound binding	-	-	-	-	-
Araip.3JJ8N	16	296.67	0.643333	10.83	4.07332	6.06483e-122	3.99031e-120	Araip.3JJ8N	PREDICTED: ethylene-responsive transcription factor 1A-like	AP2/ERF	-	GO:0097159//organic cyclic compound binding;GO:1901363//heterocyclic compound binding;GO:0003676//nucleic acid binding;GO:0003700//sequence-specific DNA binding transcription factor activity;GO:0005488//binding;GO:0003677//DNA binding;GO:0001071//nucleic acid binding transcription factor activity	-	-	-	-	-
Araip.KAK82	14	1	1.92333	0.11	-4.12803	5.6355e-10	3.06853e-09	Araip.KAK82	PREDICTED: ethylene-responsive transcription factor 3-like	AP2/ERF	-	GO:0001071//nucleic acid binding transcription factor activity;GO:0003677//DNA binding;GO:1901363//heterocyclic compound binding;GO:0003700//sequence-specific DNA binding transcription factor activity;GO:0005488//binding;GO:0003676//nucleic acid binding;GO:0097159//organic cyclic compound binding	-	-	-	-	-
Aradu.UTD2W	61.5233	5.50333	4.39667	0.373333	-3.55787	1.56875e-31	2.25568e-30	Aradu.UTD2W	PREDICTED: ethylene-responsive transcription factor 7-like	AP2/ERF	-	GO:0003677//DNA binding;GO:0003676//nucleic acid binding;GO:0003700//sequence-specific DNA binding transcription factor activity;GO:0097159//organic cyclic compound binding;GO:0005488//binding;GO:0001071//nucleic acid binding transcription factor activity;GO:1901363//heterocyclic compound binding	-	-	-	-	-
Araip.DLE1Q	88.1433	5.49667	8.02	0.473333	-4.08267	3.58823e-48	7.82355e-47	Araip.DLE1Q	PREDICTED: ethylene-responsive transcription factor 7-like	AP2/ERF	-	GO:0097159//organic cyclic compound binding;GO:0003677//DNA binding;GO:0003676//nucleic acid binding;GO:0001071//nucleic acid binding transcription factor activity;GO:0005488//binding;GO:0003700//sequence-specific DNA binding transcription factor activity;GO:1901363//heterocyclic compound binding	-	-	-	-	-
Araip.P3BCC	192	43.6667	21.3267	4.47333	-2.25324	1.42999e-50	3.27069e-49	Araip.P3BCC	PREDICTED: ethylene-responsive transcription factor 7-like	AP2/ERF	-	GO:0003700//sequence-specific DNA binding transcription factor activity;GO:0005488//binding;GO:0097159//organic cyclic compound binding;GO:1901363//heterocyclic compound binding;GO:0001071//nucleic acid binding transcription factor activity;GO:0003677//DNA binding;GO:0003676//nucleic acid binding	-	-	-	-	-
Araip.8B6ML	61.71	431.033	5.66	35.9567	2.66739	2.0675e-71	6.96519e-70	Araip.8B6ML	PREDICTED: ethylene-responsive transcription factor ABR1	AP2/ERF	-	-	-	-	-	-	-
Araip.QDN6F	134.333	28	37.8933	7.14667	-2.4066	5.09088e-20	4.85925e-19	Araip.QDN6F	PREDICTED: ethylene-responsive transcription factor RAP2-4	AP2/ERF	-	GO:0003700//sequence-specific DNA binding transcription factor activity;GO:0001071//nucleic acid binding transcription factor activity	-	-	-	-	-
Araip.CX0J5	0	4	0.001	0.216667	7.75933	0.00066733	0.0019258	Araip.CX0J5	PREDICTED: putative transcription factor bHLH041-like	bHLH	-	GO:0046983//protein dimerization activity;GO:0005488//binding;GO:0005515//protein binding	-	-	-	-	-
Aradu.JT48R	111.763	24.1633	6.53	1.28667	-2.34344	4.83624e-28	6.21496e-27	Aradu.JT48R	PREDICTED: transcription factor bHLH123-like isoform X2	bHLH	-	GO:0005515//protein binding;GO:0005488//binding;GO:0046983//protein dimerization activity	-	-	-	-	-
Araip.L83F8	114.57	19.17	6.27	0.976667	-2.68253	2.36868e-39	4.17716e-38	Araip.L83F8	PREDICTED: transcription factor bHLH123-like isoform X2	bHLH	-	GO:0005488//binding;GO:0046983//protein dimerization activity;GO:0005515//protein binding	-	-	-	-	-
Aradu.T39L1	65.6667	311.817	4.00333	17.6	2.1363	4.84198e-63	1.41867e-61	Aradu.T39L1	PREDICTED: transcription factor bHLH130 isoform X2	bHLH	-	GO:0005488//binding;GO:0046983//protein dimerization activity;GO:0005515//protein binding	-	-	-	-	-
Araip.74SLF	40.6667	201.517	2.86	12.9667	2.18072	7.01836e-36	1.12824e-34	Araip.74SLF	PREDICTED: transcription factor bHLH130 isoform X3	bHLH	-	GO:0046983//protein dimerization activity;GO:0005515//protein binding;GO:0005488//binding	-	-	-	-	-
Aradu.T3S5X	378.78	2150.54	17.7967	92.07	2.37112	1.18003e-159	1.16527e-157	Aradu.T3S5X	PREDICTED: transcription factor bHLH130-like	bHLH	-	GO:0005488//binding;GO:0046983//protein dimerization activity;GO:0005515//protein binding	-	-	-	-	-
Araip.MY816	100.553	578.457	14.89	78.0433	2.38993	2.84874e-105	1.56838e-103	Araip.MY816	PREDICTED: transcription factor bHLH130-like	bHLH	-	-	-	-	-	-	-
Aradu.K1HGS	13.7867	1.22	7.24333	0.593333	-3.60974	2.98688e-08	1.41608e-07	Aradu.K1HGS	PREDICTED: transcription factor bHLH135	bHLH	-	GO:0005515//protein binding;GO:0005488//binding;GO:0046983//protein dimerization activity	-	-	-	-	-
Aradu.D29PK	11.8	2.33333	1.00667	0.19	-2.40551	3.5328e-05	0.000121621	Aradu.D29PK	PREDICTED: transcription factor bHLH155-like	bHLH	-	-	-	-	-	-	-
Aradu.JI62L	8.96667	1.96	1.51667	0.333333	-2.18587	0.000814802	0.00231899	Aradu.JI62L	PREDICTED: transcription factor bHLH35-like	bHLH	-	GO:0005515//protein binding;GO:0046983//protein dimerization activity;GO:0005488//binding	-	-	-	-	-
Aradu.R70ZF	7.33333	0	2.75667	0.001	-11.4287	7.2039e-06	2.69567e-05	Aradu.R70ZF	PREDICTED: transcription factor bHLH35-like	bHLH	-	GO:0005488//binding;GO:0046983//protein dimerization activity;GO:0005515//protein binding	-	-	-	-	-
Araip.93FBI	4.66667	0.333333	1.77667	0.13	-3.77259	0.00146626	0.00400906	Araip.93FBI	PREDICTED: transcription factor bHLH35-like	bHLH	-	GO:0046983//protein dimerization activity;GO:0005515//protein binding;GO:0005488//binding	-	-	-	-	-
Araip.YT7PR	314.867	51.33	40.35	6.03333	-2.74154	3.04156e-51	7.03719e-50	Araip.YT7PR	PREDICTED: transcription factor bHLH35-like	bHLH	-	GO:0046983//protein dimerization activity;GO:0005515//protein binding;GO:0005488//binding	-	-	-	-	-
Araip.LP6IV	0.333333	120.72	0.0333333	11.77	8.46393	9.36653e-58	2.47028e-56	Araip.LP6IV	PREDICTED: transcription factor bHLH36-like	bHLH	-	GO:0005488//binding;GO:0003676//nucleic acid binding;GO:0046983//protein dimerization activity;GO:0097159//organic cyclic compound binding;GO:1901363//heterocyclic compound binding;GO:0005515//protein binding;GO:0003677//DNA binding	-	-	-	-	-
Araip.DYV42	2	13.3333	0.1	0.616667	2.62449	2.31818e-05	8.15462e-05	Araip.DYV42	PREDICTED: transcription factor bHLH87-like	bHLH	-	GO:0005515//protein binding;GO:0005488//binding;GO:0046983//protein dimerization activity	-	-	-	-	-
Aradu.01B4C	508.67	115.157	95.4667	20.03	-2.25283	3.19774e-111	1.89265e-109	Aradu.01B4C	PREDICTED: transcription factor bHLH93-like	bHLH	-	GO:0005515//protein binding;GO:0005488//binding;GO:0046983//protein dimerization activity	-	-	-	-	-
Araip.4C1AU	723.663	183.51	88.2767	20.2367	-2.12506	1.00973e-80	3.9591e-79	Araip.4C1AU	PREDICTED: transcription factor bHLH93-like	bHLH	-	GO:0005488//binding;GO:0046983//protein dimerization activity;GO:0005515//protein binding	-	-	-	-	-
Aradu.WC9V5	128.9	25.85	7.28667	1.32333	-2.46108	1.78448e-43	3.49964e-42	Aradu.WC9V5	transcription factor bHLH25-like	bHLH	-	GO:0005488//binding;GO:0046983//protein dimerization activity;GO:0005515//protein binding	-	-	-	-	-
Araip.JIB5P	284.1	39.15	15.0967	1.87333	-3.01055	3.38147e-75	1.21678e-73	Araip.JIB5P	transcription factor bHLH25-like	bHLH	-	GO:0005488//binding;GO:0046983//protein dimerization activity;GO:0005515//protein binding	-	-	-	-	-
Aradu.YM0TI	173.143	36.8967	7.10667	1.38	-2.3645	3.3871e-40	6.0921e-39	Aradu.YM0TI	bZIP family transcription factor	bZIP	-	GO:0005488//binding;GO:0003700//sequence-specific DNA binding transcription factor activity;GO:0097159//organic cyclic compound binding;GO:0003677//DNA binding;GO:0043565//sequence-specific DNA binding;GO:0003676//nucleic acid binding;GO:0001071//nucleic acid binding transcription factor activity;GO:1901363//heterocyclic compound binding	-	-	-	-	-
Aradu.54E1H	50.5933	237.883	1.95	8.50667	2.12512	1.10233e-35	1.76445e-34	Aradu.54E1H	bZIP transcription factor family protein	bZIP	-	GO:0097159//organic cyclic compound binding;GO:0003676//nucleic acid binding;GO:0003700//sequence-specific DNA binding transcription factor activity;GO:1901363//heterocyclic compound binding;GO:0003677//DNA binding;GO:0005488//binding;GO:0043565//sequence-specific DNA binding;GO:0001071//nucleic acid binding transcription factor activity	-	-	-	-	-
Araip.LXV0U	132.407	856.783	5.11	30.08	2.55741	2.71688e-138	2.17626e-136	Araip.LXV0U	bZIP transcription factor family protein	bZIP	-	GO:0003677//DNA binding;GO:0003700//sequence-specific DNA binding transcription factor activity;GO:0097159//organic cyclic compound binding;GO:0043565//sequence-specific DNA binding;GO:1901363//heterocyclic compound binding;GO:0005488//binding;GO:0001071//nucleic acid binding transcription factor activity;GO:0003676//nucleic acid binding	-	-	-	-	-
Aradu.HB8K6	37.38	9.33333	1.85	0.433333	-2.09398	6.70574e-11	3.88918e-10	Aradu.HB8K6	E2F transcription factor 3	E2F	GO:0005623//cell;GO:0043234//protein complex;GO:0005622//intracellular;GO:0044424//intracellular part;GO:0005667//transcription factor complex;GO:0032991//macromolecular complex;GO:0044464//cell part	GO:0001071//nucleic acid binding transcription factor activity;GO:0003700//sequence-specific DNA binding transcription factor activity	-	-	-	-	-
Araip.HB9YP	17.2867	2.66667	0.86	0.123333	-2.80177	1.98062e-07	8.6869e-07	Araip.HB9YP	E2F transcription factor 3	E2F	GO:0043234//protein complex;GO:0032991//macromolecular complex;GO:0005667//transcription factor complex;GO:0044464//cell part;GO:0005623//cell;GO:0005622//intracellular;GO:0044424//intracellular part	GO:0001071//nucleic acid binding transcription factor activity;GO:0003700//sequence-specific DNA binding transcription factor activity	-	-	-	-	-
Aradu.MA5WH	4.44667	37.56	0.293333	2.28333	2.96053	1.0747e-16	8.79087e-16	Aradu.MA5WH	heat shock transcription factor A2	HSF	GO:0043231//intracellular membrane-bounded organelle;GO:0005623//cell;GO:0043226//organelle;GO:0044424//intracellular part;GO:0005622//intracellular;GO:0043227//membrane-bounded organelle;GO:0043229//intracellular organelle;GO:0005634//nucleus;GO:0044464//cell part	GO:0005488//binding;GO:1901363//heterocyclic compound binding;GO:0001071//nucleic acid binding transcription factor activity;GO:0003676//nucleic acid binding;GO:0097159//organic cyclic compound binding;GO:0003700//sequence-specific DNA binding transcription factor activity;GO:0043565//sequence-specific DNA binding;GO:0003677//DNA binding	GO:0006950//response to stress;GO:0009628//response to abiotic stimulus;GO:0009408//response to heat;GO:0050896//response to stimulus;GO:0009266//response to temperature stimulus	-	-	-	-
Aradu.U9IPR	13.1433	84.3467	0.77	4.55667	2.56505	9.05316e-28	1.15519e-26	Aradu.U9IPR	heat shock transcription factor A2	HSF	GO:0043227//membrane-bounded organelle;GO:0005634//nucleus;GO:0043231//intracellular membrane-bounded organelle;GO:0044424//intracellular part;GO:0043226//organelle;GO:0005622//intracellular;GO:0043229//intracellular organelle;GO:0044464//cell part;GO:0005623//cell	GO:1901363//heterocyclic compound binding;GO:0003677//DNA binding;GO:0001071//nucleic acid binding transcription factor activity;GO:0005488//binding;GO:0097159//organic cyclic compound binding;GO:0043565//sequence-specific DNA binding;GO:0003700//sequence-specific DNA binding transcription factor activity;GO:0003676//nucleic acid binding	GO:0006950//response to stress;GO:0009628//response to abiotic stimulus;GO:0009408//response to heat;GO:0009266//response to temperature stimulus;GO:0050896//response to stimulus	-	-	-	-
Araip.24AK5	3.88667	46.7733	0.353333	4.01333	3.5057	7.48306e-21	7.3947e-20	Araip.24AK5	heat shock transcription factor A2	HSF	GO:0044424//intracellular part;GO:0044464//cell part;GO:0043226//organelle;GO:0043231//intracellular membrane-bounded organelle;GO:0005634//nucleus;GO:0005622//intracellular;GO:0043229//intracellular organelle;GO:0005623//cell;GO:0043227//membrane-bounded organelle	GO:1901363//heterocyclic compound binding;GO:0001071//nucleic acid binding transcription factor activity;GO:0005488//binding;GO:0003700//sequence-specific DNA binding transcription factor activity;GO:0043565//sequence-specific DNA binding;GO:0097159//organic cyclic compound binding;GO:0003676//nucleic acid binding;GO:0003677//DNA binding	GO:0009266//response to temperature stimulus;GO:0009408//response to heat;GO:0050896//response to stimulus;GO:0009628//response to abiotic stimulus;GO:0006950//response to stress	-	-	-	-
Aradu.E740H	17	107	12.0233	69.64	2.53408	2.27193e-32	3.3458e-31	Aradu.E740H	heat shock transcription factor B3	HSF	-	-	-	-	-	-	-
Aradu.X3DNX	1.00333	129.95	0.0766667	8.80333	6.84331	2.1549e-84	8.93741e-83	Aradu.X3DNX	heat shock transcription factor B4	HSF	GO:0043229//intracellular organelle;GO:0044424//intracellular part;GO:0043231//intracellular membrane-bounded organelle;GO:0005622//intracellular;GO:0044464//cell part;GO:0005634//nucleus;GO:0005623//cell;GO:0043226//organelle;GO:0043227//membrane-bounded organelle	GO:0097159//organic cyclic compound binding;GO:1901363//heterocyclic compound binding;GO:0003677//DNA binding;GO:0001071//nucleic acid binding transcription factor activity;GO:0005488//binding;GO:0003676//nucleic acid binding;GO:0003700//sequence-specific DNA binding transcription factor activity;GO:0043565//sequence-specific DNA binding	GO:0050896//response to stimulus;GO:0009628//response to abiotic stimulus;GO:0006950//response to stress;GO:0009266//response to temperature stimulus;GO:0009408//response to heat	-	-	-	-
Araip.UGV6F	0.996667	99.7167	0.0766667	6.59667	6.42699	1.23181e-67	3.91655e-66	Araip.UGV6F	heat shock transcription factor B4	HSF	GO:0005622//intracellular;GO:0043227//membrane-bounded organelle;GO:0044424//intracellular part;GO:0005623//cell;GO:0043231//intracellular membrane-bounded organelle;GO:0005634//nucleus;GO:0044464//cell part;GO:0043226//organelle;GO:0043229//intracellular organelle	GO:0003676//nucleic acid binding;GO:0003677//DNA binding;GO:0043565//sequence-specific DNA binding;GO:0005488//binding;GO:0001071//nucleic acid binding transcription factor activity;GO:0003700//sequence-specific DNA binding transcription factor activity;GO:1901363//heterocyclic compound binding;GO:0097159//organic cyclic compound binding	GO:0009628//response to abiotic stimulus;GO:0009408//response to heat;GO:0009266//response to temperature stimulus;GO:0050896//response to stimulus;GO:0006950//response to stress	-	-	-	-
Araip.FU4GL	14.2733	91.4233	0.933333	5.44333	2.54403	1.20542e-27	1.53184e-26	Araip.FU4GL	heat shock transcription factor C1	HSF	GO:0043229//intracellular organelle;GO:0005623//cell;GO:0043231//intracellular membrane-bounded organelle;GO:0005622//intracellular;GO:0043226//organelle;GO:0005634//nucleus;GO:0044424//intracellular part;GO:0044464//cell part;GO:0043227//membrane-bounded organelle	GO:0097159//organic cyclic compound binding;GO:0003700//sequence-specific DNA binding transcription factor activity;GO:0003677//DNA binding;GO:0043565//sequence-specific DNA binding;GO:0001071//nucleic acid binding transcription factor activity;GO:0005488//binding;GO:1901363//heterocyclic compound binding;GO:0003676//nucleic acid binding	GO:0009628//response to abiotic stimulus;GO:0009266//response to temperature stimulus;GO:0009408//response to heat;GO:0006950//response to stress;GO:0050896//response to stimulus	-	-	-	-
Araip.D4LH7	2	13.6667	0.09	0.56	2.63743	8.58158e-05	0.000281846	Araip.D4LH7	MADS-box transcription factor	MADS-box	GO:0005623//cell;GO:0005634//nucleus;GO:0043226//organelle;GO:0043227//membrane-bounded organelle;GO:0043229//intracellular organelle;GO:0043231//intracellular membrane-bounded organelle;GO:0044424//intracellular part;GO:0044464//cell part;GO:0005622//intracellular	GO:0003700//sequence-specific DNA binding transcription factor activity;GO:0001071//nucleic acid binding transcription factor activity	-	-	-	-	-
Aradu.TB6GC	185.24	24.69	18.8233	2.3	-3.03282	2.09172e-58	5.57702e-57	Aradu.TB6GC	MADS-box transcription factor family protein	MADS-box	GO:0044464//cell part;GO:0043229//intracellular organelle;GO:0044424//intracellular part;GO:0043227//membrane-bounded organelle;GO:0005623//cell;GO:0005622//intracellular;GO:0043231//intracellular membrane-bounded organelle;GO:0005634//nucleus;GO:0043226//organelle	GO:0005515//protein binding;GO:0097159//organic cyclic compound binding;GO:0003677//DNA binding;GO:0005488//binding;GO:0001071//nucleic acid binding transcription factor activity;GO:1901363//heterocyclic compound binding;GO:0003676//nucleic acid binding;GO:0003700//sequence-specific DNA binding transcription factor activity;GO:0046983//protein dimerization activity	-	-	-	-	-
Araip.EAZ0R	453.05	103.283	58.07	12.1133	-2.2612	7.20637e-105	3.93267e-103	Araip.EAZ0R	MADS-box transcription factor family protein	MADS-box	GO:0043226//organelle;GO:0005634//nucleus;GO:0005623//cell;GO:0005622//intracellular;GO:0043227//membrane-bounded organelle;GO:0043229//intracellular organelle;GO:0044464//cell part;GO:0044424//intracellular part;GO:0043231//intracellular membrane-bounded organelle	GO:1901363//heterocyclic compound binding;GO:0003700//sequence-specific DNA binding transcription factor activity;GO:0005488//binding;GO:0005515//protein binding;GO:0097159//organic cyclic compound binding;GO:0003677//DNA binding;GO:0046983//protein dimerization activity;GO:0001071//nucleic acid binding transcription factor activity;GO:0003676//nucleic acid binding	-	-	-	-	-
Aradu.QT7J0	37.8667	6.93	10.6733	1.9	-2.48994	2.72023e-13	1.84594e-12	Aradu.QT7J0	PREDICTED: MADS-box transcription factor 6	MADS-box	-	GO:0005488//binding;GO:0046983//protein dimerization activity;GO:0005515//protein binding;GO:0003676//nucleic acid binding;GO:1901363//heterocyclic compound binding;GO:0097159//organic cyclic compound binding;GO:0003677//DNA binding	-	-	-	-	-
Araip.33EMF	3.75333	28.43	0.196667	1.32	2.74671	1.99789e-12	1.28653e-11	Araip.33EMF	PREDICTED: MADS-box transcription factor 6	MADS-box	GO:0043231//intracellular membrane-bounded organelle;GO:0043229//intracellular organelle;GO:0005623//cell;GO:0043227//membrane-bounded organelle;GO:0005622//intracellular;GO:0044464//cell part;GO:0044424//intracellular part;GO:0005634//nucleus;GO:0043226//organelle	GO:0005515//protein binding;GO:0046983//protein dimerization activity;GO:1901363//heterocyclic compound binding;GO:0001071//nucleic acid binding transcription factor activity;GO:0003677//DNA binding;GO:0003700//sequence-specific DNA binding transcription factor activity;GO:0097159//organic cyclic compound binding;GO:0005488//binding;GO:0003676//nucleic acid binding	-	-	-	-	-
Aradu.X7LBF	12.6133	102.717	1.48333	11.1733	2.91314	1.59386e-34	2.48723e-33	Aradu.X7LBF	myb transcription factor	MYB	-	GO:0044877//macromolecular complex binding;GO:0003677//DNA binding;GO:1901363//heterocyclic compound binding;GO:0003682//chromatin binding;GO:0097159//organic cyclic compound binding;GO:0005488//binding;GO:0003676//nucleic acid binding	-	-	-	-	-
Araip.2H669	20.3867	168.283	2.30667	17.5933	2.93115	1.40737e-61	4.00815e-60	Araip.2H669	myb transcription factor	MYB	-	GO:0044877//macromolecular complex binding;GO:1901363//heterocyclic compound binding;GO:0097159//organic cyclic compound binding;GO:0003682//chromatin binding;GO:0003676//nucleic acid binding;GO:0005488//binding;GO:0003677//DNA binding	-	-	-	-	-
Aradu.59AEA	116.117	21.6633	8.76	1.51667	-2.53003	1.30278e-37	2.19777e-36	Aradu.59AEA	myb transcription factor	MYB	-	GO:0044877//macromolecular complex binding;GO:0003676//nucleic acid binding;GO:1901363//heterocyclic compound binding;GO:0097159//organic cyclic compound binding;GO:0003682//chromatin binding;GO:0005488//binding;GO:0003677//DNA binding	-	-	-	-	-
Araip.273K6	49.2933	12.69	1.86667	0.436667	-2.09586	5.61163e-14	3.9737e-13	Araip.273K6	myb transcription factor	MYB	-	GO:0003676//nucleic acid binding;GO:0044877//macromolecular complex binding;GO:0097159//organic cyclic compound binding;GO:0003682//chromatin binding;GO:0005488//binding;GO:0003677//DNA binding;GO:1901363//heterocyclic compound binding	-	-	-	-	-
Aradu.L6QML	0.333333	9.30333	0.0333333	0.926667	4.79701	9.92826e-07	4.06473e-06	Aradu.L6QML	myb transcription factor	MYB	-	GO:0003677//DNA binding;GO:0044877//macromolecular complex binding;GO:0003682//chromatin binding;GO:1901363//heterocyclic compound binding;GO:0005488//binding;GO:0097159//organic cyclic compound binding;GO:0003676//nucleic acid binding	-	-	-	-	-
Aradu.N4Y9K	10.3533	156.237	0.603333	8.46333	3.8102	1.48503e-69	4.84266e-68	Aradu.N4Y9K	myb transcription factor	MYB	-	GO:1901363//heterocyclic compound binding;GO:0044877//macromolecular complex binding;GO:0005488//binding;GO:0003682//chromatin binding;GO:0003676//nucleic acid binding;GO:0003677//DNA binding;GO:0097159//organic cyclic compound binding	-	-	-	-	-
Aradu.X0QAS	0.333333	5.16	0.0233333	0.343333	3.87915	0.00118343	0.00328581	Aradu.X0QAS	myb transcription factor	MYB	-	GO:0003677//DNA binding;GO:0097159//organic cyclic compound binding;GO:0003682//chromatin binding;GO:1901363//heterocyclic compound binding;GO:0044877//macromolecular complex binding;GO:0003676//nucleic acid binding;GO:0005488//binding	-	-	-	-	-
Araip.N0GNU	2.66667	19.6967	0.206667	1.39667	2.75661	5.13104e-09	2.59218e-08	Araip.N0GNU	myb transcription factor	MYB	-	GO:0003682//chromatin binding;GO:1901363//heterocyclic compound binding;GO:0003677//DNA binding;GO:0005488//binding;GO:0044877//macromolecular complex binding;GO:0097159//organic cyclic compound binding;GO:0003676//nucleic acid binding	-	-	-	-	-
Araip.W7HYQ	4.31333	89.43	0.22	4.20667	4.2571	3.00621e-45	6.14086e-44	Araip.W7HYQ	myb transcription factor	MYB	-	GO:1901363//heterocyclic compound binding;GO:0044877//macromolecular complex binding;GO:0003682//chromatin binding;GO:0097159//organic cyclic compound binding;GO:0003677//DNA binding;GO:0005488//binding;GO:0003676//nucleic acid binding	-	-	-	-	-
Araip.D9D8Y	283.17	63	19.1167	3.9	-2.29328	8.85453e-58	2.33635e-56	Araip.D9D8Y	myb transcription factor	MYB	-	GO:0044877//macromolecular complex binding;GO:0003682//chromatin binding;GO:0005488//binding;GO:1901363//heterocyclic compound binding;GO:0003676//nucleic acid binding;GO:0003677//DNA binding;GO:0097159//organic cyclic compound binding	-	-	-	-	-
Aradu.G26I2	2481.21	658.937	171.423	41.8933	-2.03277	9.92402e-154	9.27639e-152	Aradu.G26I2	myb transcription factor	MYB	-	GO:0005488//binding;GO:0097159//organic cyclic compound binding;GO:0003682//chromatin binding;GO:0044877//macromolecular complex binding;GO:0003677//DNA binding;GO:0003676//nucleic acid binding;GO:1901363//heterocyclic compound binding	-	-	-	-	-
Araip.PUS3S	294.787	75.0633	26.7167	6.19333	-2.10895	2.67761e-62	7.73193e-61	Araip.PUS3S	myb transcription factor	MYB	-	GO:0003677//DNA binding;GO:0003682//chromatin binding;GO:0097159//organic cyclic compound binding;GO:1901363//heterocyclic compound binding;GO:0003676//nucleic acid binding;GO:0044877//macromolecular complex binding;GO:0005488//binding	-	-	-	-	-
Aradu.62DXS	1762.67	331	220.17	38.05	-2.53265	2.63645e-155	2.5105e-153	Aradu.62DXS	myb transcription factor	MYB	-	GO:0044877//macromolecular complex binding;GO:1901363//heterocyclic compound binding;GO:0097159//organic cyclic compound binding;GO:0003677//DNA binding;GO:0003682//chromatin binding;GO:0003676//nucleic acid binding;GO:0005488//binding	-	-	-	-	-
Aradu.9DD9N	42.04	4.95	2.56667	0.293333	-3.12928	5.68446e-16	4.48785e-15	Aradu.9DD9N	myb transcription factor	MYB	-	GO:0005488//binding;GO:1901363//heterocyclic compound binding;GO:0044877//macromolecular complex binding;GO:0003677//DNA binding;GO:0003676//nucleic acid binding;GO:0003682//chromatin binding;GO:0097159//organic cyclic compound binding	-	-	-	-	-
Aradu.1DV6R	0.333333	12.2367	0.0333333	1.04667	4.97269	2.1942e-09	1.13924e-08	Aradu.1DV6R	myb transcription factor	MYB	-	GO:0044877//macromolecular complex binding;GO:0003676//nucleic acid binding;GO:0005488//binding;GO:0003677//DNA binding;GO:1901363//heterocyclic compound binding;GO:0097159//organic cyclic compound binding;GO:0003682//chromatin binding	-	-	-	-	-
Araip.76FEY	10	133.43	0.696667	8.62333	3.62971	4.99811e-57	1.30223e-55	Araip.76FEY	myb transcription factor	MYB	-	GO:0003677//DNA binding;GO:1901363//heterocyclic compound binding;GO:0005488//binding;GO:0003676//nucleic acid binding;GO:0044877//macromolecular complex binding;GO:0003682//chromatin binding;GO:0097159//organic cyclic compound binding	-	-	-	-	-
Aradu.P9RPB	1.81333	11.7367	0.39	2.35	2.59111	9.89533e-05	0.000322422	Aradu.P9RPB	myb transcription factor	MYB	-	GO:0005488//binding;GO:1901363//heterocyclic compound binding;GO:0003676//nucleic acid binding;GO:0044877//macromolecular complex binding;GO:0097159//organic cyclic compound binding;GO:0003682//chromatin binding;GO:0003677//DNA binding	-	-	-	-	-
Aradu.G7UXI	5.54	35.6633	0.36	2.09	2.53743	5.8799e-12	3.67886e-11	Aradu.G7UXI	myb transcription factor	MYB	-	GO:0003682//chromatin binding;GO:1901363//heterocyclic compound binding;GO:0044877//macromolecular complex binding;GO:0005488//binding;GO:0097159//organic cyclic compound binding;GO:0003676//nucleic acid binding;GO:0003677//DNA binding	-	-	-	-	-
Aradu.NSL0R	8.03	1.86333	0.556667	0.12	-2.21378	0.00312307	0.00807089	Aradu.NSL0R	myb transcription factor	MYB	-	GO:1901363//heterocyclic compound binding;GO:0003676//nucleic acid binding;GO:0044877//macromolecular complex binding;GO:0097159//organic cyclic compound binding;GO:0003682//chromatin binding;GO:0005488//binding;GO:0003677//DNA binding	-	-	-	-	-
Araip.MJ3JY	50.3033	5.80333	3.33333	0.353333	-3.23786	5.63178e-24	6.28521e-23	Araip.MJ3JY	myb transcription factor	MYB	-	GO:0097159//organic cyclic compound binding;GO:0003682//chromatin binding;GO:0005488//binding;GO:0003677//DNA binding;GO:1901363//heterocyclic compound binding;GO:0003676//nucleic acid binding;GO:0044877//macromolecular complex binding	-	-	-	-	-
Aradu.0Z2ZN	50.7	337.173	4.08333	24.9667	2.61218	3.48504e-96	1.71468e-94	Aradu.0Z2ZN	myb transcription factor	MYB	-	GO:0005488//binding;GO:1901363//heterocyclic compound binding;GO:0097159//organic cyclic compound binding;GO:0003677//DNA binding;GO:0003676//nucleic acid binding;GO:0003682//chromatin binding;GO:0044877//macromolecular complex binding	-	-	-	-	-
Araip.6K0VA	56.6333	403.493	6.07667	39.8967	2.71492	2.42373e-86	1.03831e-84	Araip.6K0VA	myb transcription factor	MYB	-	GO:0044877//macromolecular complex binding;GO:0005488//binding;GO:0003677//DNA binding;GO:0097159//organic cyclic compound binding;GO:1901363//heterocyclic compound binding;GO:0003676//nucleic acid binding;GO:0003682//chromatin binding	-	-	-	-	-
Aradu.CM6S6	24	561.56	1.73333	36.8467	4.40991	1.5043e-219	2.44846e-217	Aradu.CM6S6	myb transcription factor	MYB	-	GO:1901363//heterocyclic compound binding;GO:0003676//nucleic acid binding;GO:0097159//organic cyclic compound binding;GO:0044877//macromolecular complex binding;GO:0003677//DNA binding;GO:0005488//binding;GO:0003682//chromatin binding	-	-	-	-	-
Araip.P53WL	15.63	299.953	0.983333	17.3733	4.14305	3.71812e-124	2.52035e-122	Araip.P53WL	myb transcription factor	MYB	-	GO:0097159//organic cyclic compound binding;GO:0003677//DNA binding;GO:0003682//chromatin binding;GO:0005488//binding;GO:1901363//heterocyclic compound binding;GO:0044877//macromolecular complex binding;GO:0003676//nucleic acid binding	-	-	-	-	-
Aradu.CT448	85.7533	1715.79	7.38667	135.79	4.20031	0	0	Aradu.CT448	myb transcription factor	MYB	-	GO:0003677//DNA binding;GO:0097159//organic cyclic compound binding;GO:0005488//binding;GO:0003682//chromatin binding;GO:0003676//nucleic acid binding;GO:1901363//heterocyclic compound binding;GO:0044877//macromolecular complex binding	-	-	-	-	-
Araip.VH6HT	110.913	2895.21	9.37667	224.8	4.58342	0	0	Araip.VH6HT	myb transcription factor	MYB	-	GO:1901363//heterocyclic compound binding;GO:0005488//binding;GO:0097159//organic cyclic compound binding;GO:0044877//macromolecular complex binding;GO:0003677//DNA binding;GO:0003676//nucleic acid binding;GO:0003682//chromatin binding	-	-	-	-	-
Aradu.20INS	7.14333	1.11	0.69	0.11	-2.64909	0.00113389	0.00315733	Aradu.20INS	myb transcription factor	MYB	-	GO:0044877//macromolecular complex binding;GO:0005488//binding;GO:0003676//nucleic acid binding;GO:0097159//organic cyclic compound binding;GO:0003682//chromatin binding;GO:0003677//DNA binding;GO:1901363//heterocyclic compound binding	-	-	-	-	-
Araip.U6RZ5	0.333333	6.33333	0.0266667	0.44	4.04439	0.000171721	0.000540462	Araip.U6RZ5	myb transcription factor	MYB	-	GO:0044877//macromolecular complex binding;GO:1901363//heterocyclic compound binding;GO:0003682//chromatin binding;GO:0097159//organic cyclic compound binding;GO:0003677//DNA binding;GO:0003676//nucleic acid binding;GO:0005488//binding	-	-	-	-	-
Araip.M7SF9	592.223	107.64	127.74	21.0733	-2.59972	2.10101e-71	7.06956e-70	Araip.M7SF9	MYB transcription factor MYB172	MYB	-	GO:0003676//nucleic acid binding;GO:1901363//heterocyclic compound binding;GO:0003682//chromatin binding;GO:0003677//DNA binding;GO:0044877//macromolecular complex binding;GO:0097159//organic cyclic compound binding;GO:0005488//binding	-	-	-	-	-
Aradu.D0JN5	21.9167	144.907	1.33667	8.22667	2.62167	3.38574e-40	6.09161e-39	Aradu.D0JN5	MYB transcription factor MYB48	MYB	-	GO:1901363//heterocyclic compound binding;GO:0044877//macromolecular complex binding;GO:0005488//binding;GO:0003677//DNA binding;GO:0003676//nucleic acid binding;GO:0003682//chromatin binding;GO:0097159//organic cyclic compound binding	-	-	-	-	-
Aradu.DW9XI	0	22.3567	0.001	1.44	10.4919	1.7839e-16	1.44485e-15	Aradu.DW9XI	MYB transcription factor MYB48	MYB	-	GO:0097159//organic cyclic compound binding;GO:0003677//DNA binding;GO:0003676//nucleic acid binding;GO:0044877//macromolecular complex binding;GO:0003682//chromatin binding;GO:0005488//binding;GO:1901363//heterocyclic compound binding	-	-	-	-	-
Aradu.K3TU7	0	9.97	0.001	0.7	9.45121	5.98743e-08	2.75965e-07	Aradu.K3TU7	MYB transcription factor MYB48	MYB	-	GO:0044877//macromolecular complex binding;GO:0003676//nucleic acid binding;GO:0097159//organic cyclic compound binding;GO:0005488//binding;GO:0003682//chromatin binding;GO:1901363//heterocyclic compound binding;GO:0003677//DNA binding	-	-	-	-	-
Aradu.K8V1Y	0.666667	19.4433	0.0533333	1.37667	4.69	3.17601e-12	2.01687e-11	Aradu.K8V1Y	MYB transcription factor MYB48	MYB	-	GO:0044877//macromolecular complex binding;GO:0003677//DNA binding;GO:0005488//binding;GO:0097159//organic cyclic compound binding;GO:0003676//nucleic acid binding;GO:1901363//heterocyclic compound binding;GO:0003682//chromatin binding	-	-	-	-	-
Araip.0AG3E	0.333333	16.2233	0.0233333	1.09333	5.5502	8.18855e-10	4.39541e-09	Araip.0AG3E	MYB transcription factor MYB48	MYB	-	GO:0003682//chromatin binding;GO:0097159//organic cyclic compound binding;GO:0005488//binding;GO:0044877//macromolecular complex binding;GO:0003676//nucleic acid binding;GO:1901363//heterocyclic compound binding;GO:0003677//DNA binding	-	-	-	-	-
Araip.Q811U	0	12.6967	0.001	0.946667	9.88671	1.11878e-09	5.95003e-09	Araip.Q811U	MYB transcription factor MYB48	MYB	-	GO:0044877//macromolecular complex binding;GO:0003676//nucleic acid binding;GO:0097159//organic cyclic compound binding;GO:0003682//chromatin binding;GO:0005488//binding;GO:1901363//heterocyclic compound binding;GO:0003677//DNA binding	-	-	-	-	-
Araip.TSY02	1	10.6433	0.0633333	0.666667	3.39593	8.06219e-06	2.9998e-05	Araip.TSY02	MYB transcription factor MYB48	MYB	-	GO:0003677//DNA binding;GO:0005488//binding;GO:0003676//nucleic acid binding;GO:0003682//chromatin binding;GO:0044877//macromolecular complex binding;GO:0097159//organic cyclic compound binding;GO:1901363//heterocyclic compound binding	-	-	-	-	-
Aradu.FER0N	1.66667	12	0.213333	1.31667	2.62571	2.96642e-05	0.000103035	Aradu.FER0N	MYB transcription factor MYB64	MYB	-	GO:0005488//binding;GO:0003682//chromatin binding;GO:1901363//heterocyclic compound binding;GO:0097159//organic cyclic compound binding;GO:0044877//macromolecular complex binding;GO:0003677//DNA binding;GO:0003676//nucleic acid binding	-	-	-	-	-
Aradu.IC1L6	11.3333	146.667	1.31	15.7067	3.58374	3.3333e-56	8.53382e-55	Aradu.IC1L6	MYB transcription factor MYB98	MYB	-	GO:0003677//DNA binding;GO:0044877//macromolecular complex binding;GO:0003676//nucleic acid binding;GO:0003682//chromatin binding;GO:0097159//organic cyclic compound binding;GO:1901363//heterocyclic compound binding;GO:0005488//binding	-	-	-	-	-
Araip.45253	14.3333	86	1.62	9.03	2.47873	1.7842e-27	2.25353e-26	Araip.45253	MYB transcription factor MYB98	MYB	-	GO:0044877//macromolecular complex binding;GO:0005488//binding;GO:0003677//DNA binding;GO:0097159//organic cyclic compound binding;GO:0003676//nucleic acid binding;GO:0003682//chromatin binding;GO:1901363//heterocyclic compound binding	-	-	-	-	-
Aradu.C1QBJ	43.4967	6.66667	1.75667	0.243333	-2.85183	2.32247e-14	1.68268e-13	Aradu.C1QBJ	PREDICTED: myb family transcription factor APL-like isoform X1	MYB	-	GO:1901363//heterocyclic compound binding;GO:0005488//binding;GO:0003682//chromatin binding;GO:0097159//organic cyclic compound binding;GO:0003677//DNA binding;GO:0003676//nucleic acid binding;GO:0044877//macromolecular complex binding	-	-	-	-	-
Araip.6FJ5I	50.1733	12.0867	8.47667	1.82667	-2.21428	1.06065e-17	9.11816e-17	Araip.6FJ5I	PREDICTED: myb family transcription factor APL-like isoform X1	MYB	-	-	-	-	-	-	-
Araip.XK813	26.5033	4	0.94	0.133333	-2.81762	1.42074e-12	9.23317e-12	Araip.XK813	PREDICTED: myb family transcription factor APL-like isoform X1	MYB	-	GO:0097159//organic cyclic compound binding;GO:1901363//heterocyclic compound binding;GO:0003682//chromatin binding;GO:0005488//binding;GO:0003676//nucleic acid binding;GO:0003677//DNA binding;GO:0044877//macromolecular complex binding	-	-	-	-	-
Araip.ZG61K	69.1333	12.86	6.05667	1.06	-2.51446	2.90897e-21	2.92732e-20	Araip.ZG61K	PREDICTED: myb family transcription factor APL-like isoform X1	MYB	-	GO:0003677//DNA binding;GO:0003676//nucleic acid binding;GO:0097159//organic cyclic compound binding;GO:0005488//binding;GO:0003682//chromatin binding;GO:1901363//heterocyclic compound binding;GO:0044877//macromolecular complex binding	-	-	-	-	-
Araip.0FI9Y	23.3333	1.66667	1.11	0.0766667	-3.85582	1.19313e-13	8.2781e-13	Araip.0FI9Y	PREDICTED: MYB transcription factor MYB118 isoform X2	MYB	-	GO:0005488//binding;GO:0003682//chromatin binding;GO:0003677//DNA binding;GO:0044877//macromolecular complex binding;GO:0003676//nucleic acid binding;GO:0097159//organic cyclic compound binding;GO:1901363//heterocyclic compound binding	-	-	-	-	-
Aradu.0BT33	4.13	43.6267	0.84	8.15333	3.27893	2.63404e-16	2.11414e-15	Aradu.0BT33	PREDICTED: putative Myb family transcription factor At1g14600-like isoform X2	MYB	-	GO:1901363//heterocyclic compound binding;GO:0003676//nucleic acid binding;GO:0005488//binding;GO:0044877//macromolecular complex binding;GO:0003682//chromatin binding;GO:0097159//organic cyclic compound binding;GO:0003677//DNA binding	-	-	-	-	-
Araip.B91MN	17.6733	92.2433	1.11	5.31333	2.25906	3.40596e-28	4.40524e-27	Araip.B91MN	PREDICTED: putative Myb family transcription factor At1g14600-like isoform X2	MYB	-	GO:0044877//macromolecular complex binding;GO:1901363//heterocyclic compound binding;GO:0097159//organic cyclic compound binding;GO:0003676//nucleic acid binding;GO:0005488//binding;GO:0003677//DNA binding;GO:0003682//chromatin binding	-	-	-	-	-
Araip.ZD4VN	7.20333	79.3733	1.47333	14.7	3.31866	1.55426e-35	2.47721e-34	Araip.ZD4VN	PREDICTED: putative Myb family transcription factor At1g14600-like isoform X2	MYB	-	GO:1901363//heterocyclic compound binding;GO:0003676//nucleic acid binding;GO:0005488//binding;GO:0097159//organic cyclic compound binding;GO:0044877//macromolecular complex binding;GO:0003682//chromatin binding;GO:0003677//DNA binding	-	-	-	-	-
Aradu.53P8J	3267.3	872.357	247.343	59.8033	-2.04822	4.36429e-96	2.14352e-94	Aradu.53P8J	transcription factor	other	-	GO:0005515//protein binding;GO:0046983//protein dimerization activity;GO:0005488//binding	-	-	-	-	-
Araip.2A2GH	3964.04	1033.31	338.54	80.3833	-2.07436	3.54565e-134	2.72698e-132	Araip.2A2GH	transcription factor	other	-	GO:0046983//protein dimerization activity;GO:0005515//protein binding;GO:0005488//binding	-	-	-	-	-
Aradu.QW16A	156.53	836.067	4.50333	22.09	2.29433	2.20528e-150	1.99155e-148	Aradu.QW16A	PREDICTED: transcription factor GLABRA 3-like	other	-	GO:0005488//binding;GO:0005515//protein binding;GO:0046983//protein dimerization activity	-	-	-	-	-
Aradu.R0TBT	4	0	0.616667	0.001	-9.26835	0.000808558	0.00230286	Aradu.R0TBT	PREDICTED: transcription factor RADIALIS-like	other	-	GO:0003677//DNA binding;GO:0003682//chromatin binding;GO:0044877//macromolecular complex binding;GO:0005488//binding;GO:0003676//nucleic acid binding;GO:1901363//heterocyclic compound binding;GO:0097159//organic cyclic compound binding	-	-	-	-	-
Aradu.RYS1S	2.06667	23.5333	0.113333	1.19	3.39232	1.24635e-09	6.60402e-09	Aradu.RYS1S	PREDICTED: scarecrow-like transcription factor PAT1-like	scarecrow-like	-	-	-	-	-	-	-
Aradu.B6WSD	10.3467	2.66667	0.376667	0.0866667	-2.11974	0.000146575	0.000465562	Aradu.B6WSD	PREDICTED: trihelix transcription factor GT-2-like	Trihelix	-	GO:0005488//binding;GO:0003682//chromatin binding;GO:0044877//macromolecular complex binding	-	-	-	-	-
Araip.A9IXU	6.32	1.33333	0.366667	0.07	-2.38904	0.00257101	0.00673971	Araip.A9IXU	PREDICTED: trihelix transcription factor GT-2-like	Trihelix	-	-	-	-	-	-	-
Aradu.V6U4I	0.333333	19	0.0133333	0.783333	5.87652	2.63517e-13	1.78908e-12	Aradu.V6U4I	WRKY family transcription factor family protein	WRKY	-	GO:0043565//sequence-specific DNA binding;GO:0097159//organic cyclic compound binding;GO:0005488//binding;GO:1901363//heterocyclic compound binding;GO:0003677//DNA binding;GO:0001071//nucleic acid binding transcription factor activity;GO:0003700//sequence-specific DNA binding transcription factor activity;GO:0003676//nucleic acid binding	-	Organismal Systems	Environmental adaptation	ko04626//Plant-pathogen interaction	K13424
Araip.1G97J	14.3233	1.33333	0.893333	0.07	-3.67377	1.97135e-09	1.02677e-08	Araip.1G97J	WRKY family transcription factor family protein	WRKY	-	GO:0005488//binding;GO:0001071//nucleic acid binding transcription factor activity;GO:0003700//sequence-specific DNA binding transcription factor activity;GO:0097159//organic cyclic compound binding;GO:0003676//nucleic acid binding;GO:0003677//DNA binding;GO:1901363//heterocyclic compound binding;GO:0043565//sequence-specific DNA binding	-	-	-	-	-
Araip.R5S93	0.333333	38.6667	0.0133333	1.54333	6.85487	1.10543e-22	1.17446e-21	Araip.R5S93	WRKY family transcription factor family protein	WRKY	-	GO:0003676//nucleic acid binding;GO:0043565//sequence-specific DNA binding;GO:0003677//DNA binding;GO:0005488//binding;GO:1901363//heterocyclic compound binding;GO:0001071//nucleic acid binding transcription factor activity;GO:0003700//sequence-specific DNA binding transcription factor activity;GO:0097159//organic cyclic compound binding	-	Organismal Systems	Environmental adaptation	ko04626//Plant-pathogen interaction	K13424
Aradu.171F6	39	252.667	6.11667	35.8567	2.55142	7.22359e-42	1.36318e-40	Aradu.171F6	WRKY family transcription factor	WRKY	-	GO:0097159//organic cyclic compound binding;GO:0003676//nucleic acid binding;GO:0003677//DNA binding;GO:0043565//sequence-specific DNA binding;GO:0003700//sequence-specific DNA binding transcription factor activity;GO:0001071//nucleic acid binding transcription factor activity;GO:1901363//heterocyclic compound binding;GO:0005488//binding	-	-	-	-	-
Aradu.B1C6F	35.3333	664.81	4.03	69.2567	4.1031	7.96885e-211	1.18351e-208	Aradu.B1C6F	WRKY family transcription factor	WRKY	-	GO:1901363//heterocyclic compound binding;GO:0097159//organic cyclic compound binding;GO:0005488//binding;GO:0043565//sequence-specific DNA binding;GO:0001071//nucleic acid binding transcription factor activity;GO:0003677//DNA binding;GO:0003700//sequence-specific DNA binding transcription factor activity;GO:0003676//nucleic acid binding	-	-	-	-	-
Araip.D0ST6	21.3333	768.857	2.45	80.7733	5.04303	1.76542e-205	2.56746e-203	Araip.D0ST6	WRKY family transcription factor	WRKY	-	GO:0001071//nucleic acid binding transcription factor activity;GO:0097159//organic cyclic compound binding;GO:0005488//binding;GO:0003677//DNA binding;GO:0003700//sequence-specific DNA binding transcription factor activity;GO:0003676//nucleic acid binding;GO:1901363//heterocyclic compound binding;GO:0043565//sequence-specific DNA binding	-	-	-	-	-
Aradu.I8GKQ	50.1867	368.043	3.56	24.0533	2.75629	6.85583e-94	3.25862e-92	Aradu.I8GKQ	WRKY family transcription factor	WRKY	-	GO:0043565//sequence-specific DNA binding;GO:0005488//binding;GO:0003676//nucleic acid binding;GO:0001071//nucleic acid binding transcription factor activity;GO:0003677//DNA binding;GO:0003700//sequence-specific DNA binding transcription factor activity;GO:1901363//heterocyclic compound binding;GO:0097159//organic cyclic compound binding	-	-	-	-	-
Araip.761TD	10.3333	81	1.21667	8.70333	2.83863	1.02998e-29	1.39975e-28	Araip.761TD	WRKY family transcription factor	WRKY	-	GO:0001071//nucleic acid binding transcription factor activity;GO:0043565//sequence-specific DNA binding;GO:0097159//organic cyclic compound binding;GO:0003677//DNA binding;GO:0003700//sequence-specific DNA binding transcription factor activity;GO:0005488//binding;GO:1901363//heterocyclic compound binding;GO:0003676//nucleic acid binding	-	-	-	-	-
Araip.B07N1	95.1467	616.957	6.95333	41.2967	2.57025	3.6082e-105	1.98065e-103	Araip.B07N1	WRKY family transcription factor	WRKY	-	GO:0001071//nucleic acid binding transcription factor activity;GO:0005488//binding;GO:1901363//heterocyclic compound binding;GO:0003677//DNA binding;GO:0003700//sequence-specific DNA binding transcription factor activity;GO:0043565//sequence-specific DNA binding;GO:0003676//nucleic acid binding;GO:0097159//organic cyclic compound binding	-	-	-	-	-
Araip.N4R5C	3.66667	0	0.256667	0.001	-8.00375	0.00135111	0.00371544	Araip.N4R5C	WRKY family transcription factor	WRKY	-	GO:0043565//sequence-specific DNA binding;GO:0003700//sequence-specific DNA binding transcription factor activity;GO:0003676//nucleic acid binding;GO:0005488//binding;GO:1901363//heterocyclic compound binding;GO:0001071//nucleic acid binding transcription factor activity;GO:0097159//organic cyclic compound binding;GO:0003677//DNA binding	-	-	-	-	-
Aradu.RZ9Z0	3.66667	17.0033	0.28	1.25333	2.16227	8.8379e-05	0.000289788	Aradu.RZ9Z0	WRKY family transcription factor	WRKY	-	GO:0003677//DNA binding;GO:0003700//sequence-specific DNA binding transcription factor activity;GO:0003676//nucleic acid binding;GO:0005488//binding;GO:0001071//nucleic acid binding transcription factor activity;GO:0043565//sequence-specific DNA binding;GO:0097159//organic cyclic compound binding;GO:1901363//heterocyclic compound binding	-	-	-	-	-
Araip.HGN3R	1.65667	8.20333	0.253333	1.07333	2.08299	0.00295617	0.0076686	Araip.HGN3R	WRKY family transcription factor	WRKY	-	GO:0003676//nucleic acid binding;GO:0043565//sequence-specific DNA binding;GO:1901363//heterocyclic compound binding;GO:0003700//sequence-specific DNA binding transcription factor activity;GO:0003677//DNA binding;GO:0001071//nucleic acid binding transcription factor activity;GO:0005488//binding;GO:0097159//organic cyclic compound binding	-	Organismal Systems	Environmental adaptation	ko04626//Plant-pathogen interaction	K13425
Araip.X9JQZ	485.673	125.753	23.8033	5.68333	-2.06635	2.47052e-92	1.15081e-90	Araip.X9JQZ	WRKY family transcription factor	WRKY	-	GO:0003700//sequence-specific DNA binding transcription factor activity;GO:0003676//nucleic acid binding;GO:0003677//DNA binding;GO:1901363//heterocyclic compound binding;GO:0043565//sequence-specific DNA binding;GO:0005488//binding;GO:0001071//nucleic acid binding transcription factor activity;GO:0097159//organic cyclic compound binding	-	-	-	-	-
Aradu.1C3SG	2	18.3333	0.0733333	0.643333	3.13303	8.5728e-08	3.88853e-07	Aradu.1C3SG	WRKY family transcription factor	WRKY	-	GO:0003676//nucleic acid binding;GO:0043565//sequence-specific DNA binding;GO:1901363//heterocyclic compound binding;GO:0003677//DNA binding;GO:0003700//sequence-specific DNA binding transcription factor activity;GO:0001071//nucleic acid binding transcription factor activity;GO:0005488//binding;GO:0097159//organic cyclic compound binding	-	-	-	-	-
Aradu.7AC9I	39.3333	2.33333	3.44333	0.17	-4.3402	3.02493e-22	3.16282e-21	Aradu.7AC9I	WRKY family transcription factor	WRKY	-	GO:0003677//DNA binding;GO:0003700//sequence-specific DNA binding transcription factor activity;GO:0097159//organic cyclic compound binding;GO:0001071//nucleic acid binding transcription factor activity;GO:1901363//heterocyclic compound binding;GO:0005488//binding;GO:0003676//nucleic acid binding;GO:0043565//sequence-specific DNA binding	-	-	-	-	-
Aradu.M1GCR	0.333333	6.66333	0.0233333	0.453333	4.28011	8.92858e-05	0.000292539	Aradu.M1GCR	WRKY family transcription factor	WRKY	-	GO:0005488//binding;GO:0097159//organic cyclic compound binding;GO:0003676//nucleic acid binding;GO:0001071//nucleic acid binding transcription factor activity;GO:1901363//heterocyclic compound binding;GO:0003700//sequence-specific DNA binding transcription factor activity;GO:0043565//sequence-specific DNA binding;GO:0003677//DNA binding	-	-	-	-	-
Aradu.VL3IZ	13.1	92.5633	0.663333	4.28333	2.69093	1.97716e-30	2.75723e-29	Aradu.VL3IZ	WRKY family transcription factor	WRKY	-	GO:0097159//organic cyclic compound binding;GO:0001071//nucleic acid binding transcription factor activity;GO:0005488//binding;GO:1901363//heterocyclic compound binding;GO:0003700//sequence-specific DNA binding transcription factor activity;GO:0043565//sequence-specific DNA binding;GO:0003676//nucleic acid binding;GO:0003677//DNA binding	-	-	-	-	-
Araip.15EJY	0.343333	10.33	0.0266667	0.673333	4.65821	3.28098e-05	0.000113384	Araip.15EJY	WRKY family transcription factor	WRKY	-	GO:0003676//nucleic acid binding;GO:0001071//nucleic acid binding transcription factor activity;GO:0043565//sequence-specific DNA binding;GO:0003700//sequence-specific DNA binding transcription factor activity;GO:1901363//heterocyclic compound binding;GO:0003677//DNA binding;GO:0005488//binding;GO:0097159//organic cyclic compound binding	-	-	-	-	-
Araip.AR7FU	62.3333	307.127	3.68667	16.8433	2.19179	1.63646e-39	2.89593e-38	Araip.AR7FU	WRKY family transcription factor	WRKY	-	GO:0003677//DNA binding;GO:1901363//heterocyclic compound binding;GO:0097159//organic cyclic compound binding;GO:0001071//nucleic acid binding transcription factor activity;GO:0003700//sequence-specific DNA binding transcription factor activity;GO:0003676//nucleic acid binding;GO:0005488//binding;GO:0043565//sequence-specific DNA binding	-	-	-	-	-
Aradu.180Q6	1.33333	24.6667	0.07	1.14	4.02554	1.81048e-14	1.32182e-13	Aradu.180Q6	WRKY family transcription factor	WRKY	-	GO:0001071//nucleic acid binding transcription factor activity;GO:0003676//nucleic acid binding;GO:1901363//heterocyclic compound binding;GO:0003677//DNA binding;GO:0005488//binding;GO:0003700//sequence-specific DNA binding transcription factor activity;GO:0043565//sequence-specific DNA binding;GO:0097159//organic cyclic compound binding	-	-	-	-	-
Araip.LH5AE	3.66667	18.6667	0.25	1.16	2.21412	1.81513e-05	6.47621e-05	Araip.LH5AE	WRKY family transcription factor	WRKY	-	GO:1901363//heterocyclic compound binding;GO:0001071//nucleic acid binding transcription factor activity;GO:0043565//sequence-specific DNA binding;GO:0003676//nucleic acid binding;GO:0003700//sequence-specific DNA binding transcription factor activity;GO:0005488//binding;GO:0097159//organic cyclic compound binding;GO:0003677//DNA binding	-	-	-	-	-
Araip.LSC0K	306.33	1629.52	11.0033	54.1567	2.2992	1.27073e-94	6.09155e-93	Araip.LSC0K	WRKY family transcription factor	WRKY	-	GO:0005488//binding;GO:0003700//sequence-specific DNA binding transcription factor activity;GO:0097159//organic cyclic compound binding;GO:0003676//nucleic acid binding;GO:0001071//nucleic acid binding transcription factor activity;GO:0043565//sequence-specific DNA binding;GO:0003677//DNA binding;GO:1901363//heterocyclic compound binding	-	-	-	-	-
