# Supplementary material for: Comparative Transcriptome Analysis Reveals Molecular Defensive Mechanism of Arachis hypogaea in Response to Salt Stress
Source: Int J Genomics. 2020 Feb 26;2020:6524093. doi: 10.1155/2020/6524093 (PMC7063224; doi:10.1155/2020/6524093)
Supplement: Supplementary 3 — Supplementary Table S3: the GO enrichment analysis of DEGs. [file 6524093.f3.xlsx]

## Sheet: up-regulated DGEs
GO_accession	Description	GeneNames	Ontology	pValue	FDR	fg	bg
GO:0071554	cell wall organization or biogenesis	Aradu.3P5HB,Aradu.8VI8X,Aradu.945F4,Aradu.D2VN6,Aradu.FBN6P,Aradu.FCE0K,Aradu.HLM3M,Aradu.N24L5,Aradu.QCG85,Aradu.S226I,Aradu.T6VPT,Aradu.U4EKF,Aradu.V91T8,Araip.1BL7S,Araip.30HVE,Araip.3B5EA,Araip.BSB2C,Araip.C1BT9,Araip.HE3VH,Araip.J70SC,Araip.L3A4T,Araip.NL2P7,Araip.PB3YQ,Araip.PN0QJ,Araip.QW1VD,Araip.TH463,Araip.VW283,Araip.X10KJ,Araip.Z2FEM	BP	1.4e-07	2.00667e-06	29	355
GO:0055114	oxidation-reduction process	Aradu.05WJ3,Aradu.0Z207,Aradu.12T0R,Aradu.1B07H,Aradu.1V1I5,Aradu.29SDF,Aradu.2GI7U,Aradu.2I26G,Aradu.2U1V2,Aradu.3S81N,Aradu.5IY1Y,Aradu.5K9HV,Aradu.5QH0B,Aradu.62IYE,Aradu.6AL72,Aradu.70ZJ1,Aradu.748MX,Aradu.74ERY,Aradu.7X3HU,Aradu.8AQ1Z,Aradu.97LA5,Aradu.9XI8P,Aradu.A0MU0,Aradu.A3K6K,Aradu.AT1JC,Aradu.CAR17,Aradu.CH74S,Aradu.D5VFR,Aradu.DVQ9A,Aradu.EZJ0T,Aradu.FBG4E,Aradu.FCP6L,Aradu.FV6YV,Ara…	BP	1.1e-05	4.73e-05	127	3270
GO:0016049	cell growth	Aradu.HLM3M,Aradu.T6VPT,Araip.C1BT9,Araip.PN0QJ,Araip.QW1VD,Araip.TH463	BP	0.00019	0.000371364	6	32
GO:0040007	growth	Aradu.HLM3M,Aradu.T6VPT,Araip.C1BT9,Araip.PN0QJ,Araip.QW1VD,Araip.TH463	BP	0.00027	0.000504783	6	34
GO:0006950	response to stress	Aradu.12T0R,Aradu.17W6W,Aradu.46JQQ,Aradu.4SM4Z,Aradu.5133E,Aradu.55V7V,Aradu.70ZJ1,Aradu.8AQ1Z,Aradu.8IA8J,Aradu.AGS84,Aradu.AM0MT,Aradu.B6WMN,Aradu.D5B5P,Aradu.FBG4E,Aradu.FCP6L,Aradu.G0IJA,Aradu.G40TW,Aradu.GH8X4,Aradu.I66GQ,Aradu.JL2G6,Aradu.L9J3S,Aradu.M6G8C,Aradu.N5IEQ,Aradu.P8XD7,Aradu.RA6Y4,Aradu.W1C7I,Aradu.XV6T4,Aradu.YHD0I,Aradu.Z74IT,Araip.05JB8,Araip.0YN4A,Araip.24YLP,Araip.56WMB,Ara…	BP	0.00392	0.00581241	66	1754
GO:0016209	antioxidant activity	Aradu.12T0R,Aradu.70ZJ1,Aradu.8AQ1Z,Aradu.FBG4E,Aradu.FCP6L,Aradu.I66GQ,Aradu.JL2G6,Aradu.N5IEQ,Aradu.QV0LR,Aradu.Z74IT,Araip.653SG,Araip.696IC,Araip.7P78Q,Araip.C2I9V,Araip.DER8T,Araip.I0093,Araip.JSZ6P,Araip.L2KPV,Araip.SWD4L,Araip.X19TV,Araip.XM51W,Araip.ZET1U	MF	1.8e-06	2.16e-05	22	304
GO:0004601	peroxidase activity	Aradu.12T0R,Aradu.70ZJ1,Aradu.8AQ1Z,Aradu.FBG4E,Aradu.FCP6L,Aradu.JL2G6,Aradu.N5IEQ,Aradu.Z74IT,Araip.653SG,Araip.696IC,Araip.C2I9V,Araip.DER8T,Araip.I0093,Araip.JSZ6P,Araip.L2KPV,Araip.SWD4L,Araip.X19TV,Araip.XM51W,Araip.ZET1U	MF	3.6e-06	3.78e-05	19	246
GO:0016491	oxidoreductase activity	Aradu.05WJ3,Aradu.0Z207,Aradu.12T0R,Aradu.18I2L,Aradu.1B07H,Aradu.29SDF,Aradu.2GI7U,Aradu.2U1V2,Aradu.3S81N,Aradu.5IY1Y,Aradu.5QH0B,Aradu.62IYE,Aradu.70ZJ1,Aradu.74ERY,Aradu.8AQ1Z,Aradu.97LA5,Aradu.9XI8P,Aradu.BPN9K,Aradu.CH74S,Aradu.DVQ9A,Aradu.E6GI1,Aradu.FBG4E,Aradu.FCP6L,Aradu.FV6YV,Aradu.GBM3Q,Aradu.H324N,Aradu.H8Z7K,Aradu.H92LC,Aradu.HES8F,Aradu.HQT4J,Aradu.I5LRV,Aradu.I66GQ,Aradu.IEX64,Ara…	MF	6.4e-06	5.97333e-05	105	3036
GO:0048037	cofactor binding	Aradu.1V1I5,Aradu.2I26G,Aradu.62IYE,Aradu.6AL72,Aradu.70ZJ1,Aradu.7X3HU,Aradu.8AQ1Z,Aradu.97LA5,Aradu.A0MU0,Aradu.A3K6K,Aradu.AT1JC,Aradu.CAR17,Aradu.D5VFR,Aradu.D7ILP,Aradu.DV28N,Aradu.DVQ9A,Aradu.EZJ0T,Aradu.FBG4E,Aradu.FCP6L,Aradu.FV6YV,Aradu.HES8F,Aradu.I66GQ,Aradu.JL2G6,Aradu.K51ZU,Aradu.KJH8E,Aradu.L8GY0,Aradu.N5IEQ,Aradu.P0VF2,Aradu.R84PZ,Aradu.RI6SZ,Aradu.Y7I9D,Aradu.YXE38,Aradu.Z74IT,Ara…	MF	0.0002	0.0012	75	2192
GO:0038023	signaling receptor activity	Aradu.50ZYK,Aradu.EWH58,Aradu.H9LWJ,Araip.5YD81,Araip.696K4,Araip.70MBH,Araip.I0Y2J,Araip.IR8SW,Araip.KY4DP	MF	0.00021	0.001176	9	91
GO:0004857	enzyme inhibitor activity	Aradu.3P5HB,Aradu.945F4,Aradu.L3NRF,Aradu.QCG85,Aradu.U4EKF,Aradu.V91T8,Araip.07H1P,Araip.3B5EA,Araip.BSB2C,Araip.J70SC,Araip.L3A4T,Araip.MP34A,Araip.PB3YQ,Araip.W3HL3,Araip.Z2FEM	MF	0.00022	0.001155	15	228
GO:0005215	transporter activity	Aradu.08REY,Aradu.08Y2X,Aradu.0K49H,Aradu.182MN,Aradu.3IZ11,Aradu.3LM76,Aradu.4N10P,Aradu.8H8GJ,Aradu.BDD78,Aradu.CD2E5,Aradu.EWH58,Aradu.F9L0R,Aradu.GZK47,Aradu.HT3CH,Aradu.J1VYR,Aradu.JV0C2,Aradu.KM3QT,Aradu.LYE3Y,Aradu.PU63R,Aradu.Q67RD,Aradu.R0KJF,Aradu.RMH27,Aradu.TRF59,Aradu.U8CR2,Aradu.X4M49,Aradu.ZN9Y3,Araip.09AXD,Araip.0I82K,Araip.0J4JS,Araip.3VU90,Araip.4LL7A,Araip.4SP4E,Araip.58313,Ara…	MF	0.0032	0.00867097	59	1818
GO:0071944	cell periphery	Aradu.182MN,Aradu.27SYD,Aradu.2R9F5,Aradu.3P5HB,Aradu.72595,Aradu.750CN,Aradu.8VI8X,Aradu.945F4,Aradu.B78C7,Aradu.CTP8M,Aradu.FBN6P,Aradu.HRR2H,Aradu.M0ZVI,Aradu.NAI9H,Aradu.NE93Q,Aradu.QCG85,Aradu.S226I,Aradu.TRF59,Aradu.U4EKF,Aradu.V91T8,Aradu.ZMM9X,Araip.0J4JS,Araip.1BL7S,Araip.30HVE,Araip.35A56,Araip.3B5EA,Araip.65A3I,Araip.7JN11,Araip.BSB2C,Araip.DQK56,Araip.ETU2Y,Araip.EWB8P,Araip.I0HKJ,Ara…	CC	9.6e-25	1.056e-23	46	353
GO:0030312	external encapsulating structure	Aradu.27SYD,Aradu.3P5HB,Aradu.72595,Aradu.750CN,Aradu.8VI8X,Aradu.945F4,Aradu.CTP8M,Aradu.FBN6P,Aradu.HRR2H,Aradu.M0ZVI,Aradu.NAI9H,Aradu.QCG85,Aradu.S226I,Aradu.U4EKF,Aradu.V91T8,Aradu.ZMM9X,Araip.1BL7S,Araip.30HVE,Araip.35A56,Araip.3B5EA,Araip.65A3I,Araip.7JN11,Araip.BSB2C,Araip.ETU2Y,Araip.EWB8P,Araip.I0HKJ,Araip.J70SC,Araip.L3A4T,Araip.M80A5,Araip.PB3YQ,Araip.PU78I,Araip.UAX0Q,Araip.Y6X2Y,Ara…	CC	4.5e-22	1.65e-21	36	230
GO:0048046	apoplast	Aradu.27SYD,Aradu.72595,Aradu.750CN,Aradu.CTP8M,Aradu.HRR2H,Aradu.M0ZVI,Aradu.NAI9H,Aradu.ZMM9X,Araip.35A56,Araip.65A3I,Araip.ETU2Y,Araip.EWB8P,Araip.I0HKJ,Araip.I0S4M,Araip.M80A5,Araip.PU78I,Araip.UAX0Q,Araip.Y6X2Y,Araip.ZEV2T,Araip.ZSY8U	CC	1.4e-18	3.85e-18	20	66
GO:0005576	extracellular region	Aradu.27SYD,Aradu.29SDF,Aradu.72595,Aradu.750CN,Aradu.CTP8M,Aradu.HRR2H,Aradu.M0ZVI,Aradu.NAI9H,Aradu.ZMM9X,Araip.35A56,Araip.65A3I,Araip.7JN11,Araip.ETU2Y,Araip.EWB8P,Araip.I0HKJ,Araip.I0S4M,Araip.M80A5,Araip.PU78I,Araip.UAX0Q,Araip.Y6X2Y,Araip.ZEV2T,Araip.ZSY8U	CC	1.1e-13	2.42e-13	22	142
GO:0005886	plasma membrane	Aradu.182MN,Aradu.2R9F5,Aradu.B78C7,Aradu.NE93Q,Aradu.TRF59,Araip.V6D67	CC	0.0013	0.0017875	6	59
GO:0016020	membrane	Aradu.08Y2X,Aradu.0B0KP,Aradu.0VN2L,Aradu.182MN,Aradu.2R9F5,Aradu.43BK3,Aradu.4N10P,Aradu.5K9HV,Aradu.7HS2D,Aradu.81HAH,Aradu.91S58,Aradu.95872,Aradu.B5E3M,Aradu.B78C7,Aradu.DL7C8,Aradu.F46YV,Aradu.FE1BY,Aradu.G2VQL,Aradu.G6GR7,Aradu.HBL25,Aradu.HLM3M,Aradu.I1U3H,Aradu.JV0C2,Aradu.KJ6HK,Aradu.LYE3Y,Aradu.N3EHS,Aradu.NE93Q,Aradu.NI2XR,Aradu.Q67RD,Aradu.Q71BR,Aradu.S66KS,Aradu.SJ1TV,Aradu.T6VPT,Ara…	CC	0.0046	0.00506	87	3342

## Sheet: down-regulated DGEs
GO_accession	Description	GeneNames	Ontology	pValue	FDR	fg	bg
GO:0055114	oxidation-reduction process	Aradu.0C9TU,Aradu.0RF9R,Aradu.10WEW,Aradu.1B2LG,Aradu.1C9UI,Aradu.1UI8P,Aradu.1X6G8,Aradu.251QA,Aradu.25598,Aradu.268F1,Aradu.2W676,Aradu.398HV,Aradu.3K9KE,Aradu.3L0G1,Aradu.3TT1Y,Aradu.3WC73,Aradu.4262U,Aradu.427SB,Aradu.42SWI,Aradu.4AG6X,Aradu.4B6GH,Aradu.4RE2S,Aradu.4T5J3,Aradu.52Q7K,Aradu.542S7,Aradu.5T6BE,Aradu.5ZC0V,Aradu.60DAC,Aradu.65HV5,Aradu.67IGJ,Aradu.6Q428,Aradu.73MTJ,Aradu.7K9KV,Ara…	BP	1.1e-21	8.14e-20	265	3270
GO:0009607	response to biotic stimulus	Aradu.0J3SA,Aradu.0X3DX,Aradu.80WA5,Aradu.8WS4M,Aradu.CHQ37,Aradu.FHW89,Aradu.KI3UZ,Aradu.RDQ06,Aradu.WYC64,Aradu.ZH6BL,Araip.0T253,Araip.23EKN,Araip.57QXL,Araip.B08ZE,Araip.D2NS0,Araip.E18N2,Araip.GYU0T,Araip.H1IIW,Araip.I9KX3,Araip.J0C95,Araip.JPJ83,Araip.MQ6CB,Araip.RDM9N,Araip.TSU7Y,Araip.UY6ZE,Araip.W3N2F,Araip.Z0AKG,Araip.Z24SH	BP	1e-10	3.7e-09	28	145
GO:0009875	pollen-pistil interaction	Aradu.083WP,Aradu.4Z3ES,Aradu.56PKD,Aradu.7ZB45,Aradu.80RUZ,Aradu.853ZC,Aradu.B17TN,Aradu.E8J8G,Aradu.G2KK1,Aradu.JTL52,Aradu.Q5HZK,Araip.20NUY,Araip.62J85,Araip.8HX9V,Araip.D3CIW,Araip.E7J8H,Araip.K1QG2,Araip.Q1Z2E,Araip.R1BAT,Araip.UFA1S,Araip.WP08L,Araip.YBI64	BP	2.4e-06	1.31556e-05	22	154
GO:0048544	recognition of pollen	Aradu.083WP,Aradu.4Z3ES,Aradu.56PKD,Aradu.7ZB45,Aradu.80RUZ,Aradu.853ZC,Aradu.B17TN,Aradu.E8J8G,Aradu.G2KK1,Aradu.JTL52,Aradu.Q5HZK,Araip.20NUY,Araip.62J85,Araip.8HX9V,Araip.D3CIW,Araip.E7J8H,Araip.K1QG2,Araip.Q1Z2E,Araip.R1BAT,Araip.UFA1S,Araip.WP08L,Araip.YBI64	BP	2.4e-06	1.31556e-05	22	154
GO:0008037	cell recognition	Aradu.083WP,Aradu.4Z3ES,Aradu.56PKD,Aradu.7ZB45,Aradu.80RUZ,Aradu.853ZC,Aradu.B17TN,Aradu.E8J8G,Aradu.G2KK1,Aradu.JTL52,Aradu.Q5HZK,Araip.20NUY,Araip.62J85,Araip.8HX9V,Araip.D3CIW,Araip.E7J8H,Araip.K1QG2,Araip.Q1Z2E,Araip.R1BAT,Araip.UFA1S,Araip.WP08L,Araip.YBI64	BP	2.7e-06	1.332e-05	22	155
GO:0009856	pollination	Aradu.083WP,Aradu.4Z3ES,Aradu.56PKD,Aradu.7ZB45,Aradu.80RUZ,Aradu.853ZC,Aradu.B17TN,Aradu.E8J8G,Aradu.G2KK1,Aradu.JTL52,Aradu.Q5HZK,Araip.20NUY,Araip.62J85,Araip.8HX9V,Araip.D3CIW,Araip.E7J8H,Araip.K1QG2,Araip.Q1Z2E,Araip.R1BAT,Araip.UFA1S,Araip.WP08L,Araip.YBI64	BP	3e-06	1.34545e-05	22	156
GO:0044706	multi-multicellular organism process	Aradu.083WP,Aradu.4Z3ES,Aradu.56PKD,Aradu.7ZB45,Aradu.80RUZ,Aradu.853ZC,Aradu.B17TN,Aradu.E8J8G,Aradu.G2KK1,Aradu.JTL52,Aradu.Q5HZK,Araip.20NUY,Araip.62J85,Araip.8HX9V,Araip.D3CIW,Araip.E7J8H,Araip.K1QG2,Araip.Q1Z2E,Araip.R1BAT,Araip.UFA1S,Araip.WP08L,Araip.YBI64	BP	3e-06	1.34545e-05	22	156
GO:0051704	multi-organism process	Aradu.083WP,Aradu.4Z3ES,Aradu.56PKD,Aradu.7ZB45,Aradu.80RUZ,Aradu.853ZC,Aradu.B17TN,Aradu.E8J8G,Aradu.FHW89,Aradu.G2KK1,Aradu.JTL52,Aradu.Q5HZK,Aradu.RDQ06,Araip.20NUY,Araip.62J85,Araip.8HX9V,Araip.D3CIW,Araip.E7J8H,Araip.K1QG2,Araip.Q1Z2E,Araip.R1BAT,Araip.UFA1S,Araip.UY6ZE,Araip.WP08L,Araip.YBI64	BP	1.7e-05	6.98889e-05	25	212
GO:0008152	metabolic process	Aradu.00EZV,Aradu.06GAS,Aradu.083WP,Aradu.0C9TU,Aradu.0CJ3T,Aradu.0RF9R,Aradu.0U1AX,Aradu.0X4JL,Aradu.0X4TI,Aradu.0Y40Q,Aradu.10WEW,Aradu.12HYF,Aradu.149WS,Aradu.15REA,Aradu.1AP46,Aradu.1B2LG,Aradu.1C9UI,Aradu.1UI8P,Aradu.1X6G8,Aradu.21XDZ,Aradu.251QA,Aradu.25598,Aradu.268F1,Aradu.27C7S,Aradu.28IY3,Aradu.2IP8A,Aradu.2QN43,Aradu.2V34U,Aradu.2W676,Aradu.2X47D,Aradu.2XW42,Aradu.32LC7,Aradu.348PZ,Ara…	BP	2.5e-05	9.73684e-05	816	16485
GO:0044703	multi-organism reproductive process	Aradu.083WP,Aradu.4Z3ES,Aradu.56PKD,Aradu.7ZB45,Aradu.80RUZ,Aradu.853ZC,Aradu.B17TN,Aradu.E8J8G,Aradu.G2KK1,Aradu.JTL52,Aradu.Q5HZK,Araip.20NUY,Araip.62J85,Araip.8HX9V,Araip.D3CIW,Araip.E7J8H,Araip.K1QG2,Araip.Q1Z2E,Araip.R1BAT,Araip.UFA1S,Araip.WP08L,Araip.YBI64	BP	3.3e-05	0.0001221	22	181
GO:0032501	multicellular organismal process	Aradu.083WP,Aradu.2K04Y,Aradu.4Z3ES,Aradu.56PKD,Aradu.7ZB45,Aradu.80RUZ,Aradu.853ZC,Aradu.A02RY,Aradu.B17TN,Aradu.E8J8G,Aradu.G2KK1,Aradu.JTL52,Aradu.Q5HZK,Araip.20NUY,Araip.62J85,Araip.7HP1R,Araip.8HX9V,Araip.D3CIW,Araip.E7J8H,Araip.K1QG2,Araip.Q1Z2E,Araip.R1BAT,Araip.UFA1S,Araip.WP08L,Araip.YBI64	BP	0.0002	0.000704762	25	247
GO:0000003	reproduction	Aradu.083WP,Aradu.4Z3ES,Aradu.56PKD,Aradu.7ZB45,Aradu.80RUZ,Aradu.853ZC,Aradu.B17TN,Aradu.E8J8G,Aradu.G2KK1,Aradu.JTL52,Aradu.Q5HZK,Araip.20NUY,Araip.62J85,Araip.8HX9V,Araip.D3CIW,Araip.E7J8H,Araip.K1QG2,Araip.Q1Z2E,Araip.R1BAT,Araip.UFA1S,Araip.WP08L,Araip.YBI64	BP	0.00056	0.00184178	22	220
GO:0022414	reproductive process	Aradu.083WP,Aradu.4Z3ES,Aradu.56PKD,Aradu.7ZB45,Aradu.80RUZ,Aradu.853ZC,Aradu.B17TN,Aradu.E8J8G,Aradu.G2KK1,Aradu.JTL52,Aradu.Q5HZK,Araip.20NUY,Araip.62J85,Araip.8HX9V,Araip.D3CIW,Araip.E7J8H,Araip.K1QG2,Araip.Q1Z2E,Araip.R1BAT,Araip.UFA1S,Araip.WP08L,Araip.YBI64	BP	0.00056	0.00184178	22	220
GO:0003824	catalytic activity	Aradu.06GAS,Aradu.083WP,Aradu.0C9TU,Aradu.0G0TP,Aradu.0RF9R,Aradu.0U1AX,Aradu.0X4TI,Aradu.0Y40Q,Aradu.0ZM70,Aradu.12EER,Aradu.12ETV,Aradu.12HYF,Aradu.149WS,Aradu.158JQ,Aradu.15REA,Aradu.1A3FB,Aradu.1AP46,Aradu.1C9UI,Aradu.1M29V,Aradu.1UI8P,Aradu.20H38,Aradu.21XDZ,Aradu.251QA,Aradu.25598,Aradu.28IY3,Aradu.2BI4W,Aradu.2IP8A,Aradu.2QN43,Aradu.2QX0T,Aradu.2W676,Aradu.2X47D,Aradu.2XW42,Aradu.32LC7,Ara…	MF	1e-29	6.05e-28	773	16258
GO:0016491	oxidoreductase activity	Aradu.0C9TU,Aradu.0RF9R,Aradu.1C9UI,Aradu.1UI8P,Aradu.251QA,Aradu.25598,Aradu.2QN43,Aradu.2W676,Aradu.3L0G1,Aradu.46T7Q,Aradu.4AG6X,Aradu.4M7RM,Aradu.4RE2S,Aradu.52Q7K,Aradu.5T6BE,Aradu.5ZC0V,Aradu.60DAC,Aradu.65HV5,Aradu.67IGJ,Aradu.6Q428,Aradu.7K9KV,Aradu.7SN56,Aradu.82DSF,Aradu.83KXV,Aradu.8BQ4V,Aradu.92ZAJ,Aradu.951UC,Aradu.9T74D,Aradu.AS232,Aradu.B63QG,Aradu.B7Z5E,Aradu.C04VQ,Aradu.C881Z,Ara…	MF	2.4e-23	9.68e-22	216	3036
GO:0048037	cofactor binding	Aradu.0C9TU,Aradu.10WEW,Aradu.149WS,Aradu.158JQ,Aradu.1B2LG,Aradu.1X6G8,Aradu.251QA,Aradu.268F1,Aradu.2W676,Aradu.398HV,Aradu.3K9KE,Aradu.3R43N,Aradu.3TT1Y,Aradu.3WC73,Aradu.4262U,Aradu.427SB,Aradu.46DEV,Aradu.4B6GH,Aradu.4RE2S,Aradu.4T5J3,Aradu.52Q7K,Aradu.5ZC0V,Aradu.62W74,Aradu.6Q428,Aradu.6T4IB,Aradu.73MTJ,Aradu.7K9KV,Aradu.82DSF,Aradu.8J00F,Aradu.9R9X3,Aradu.ABR4L,Aradu.AIC9K,Aradu.AT03S,Ara…	MF	1.1e-21	3.3275e-20	169	2192
GO:0016829	lyase activity	Aradu.12EER,Aradu.15REA,Aradu.2X47D,Aradu.34L9V,Aradu.46DEV,Aradu.6T4IB,Aradu.AT03S,Aradu.B8GCY,Aradu.BWM82,Aradu.EF5K9,Aradu.EH3DA,Aradu.IU1HH,Aradu.K4APN,Aradu.KMG0A,Aradu.LSQ2N,Aradu.M7NEJ,Aradu.NL2WD,Aradu.RR8PW,Aradu.TRR88,Aradu.W0BBS,Aradu.XUN5S,Aradu.Y32US,Araip.23XFA,Araip.24S3M,Araip.27UQJ,Araip.2FA6F,Araip.4F18W,Araip.5MT98,Araip.69J63,Araip.ARQ95,Araip.C41LK,Araip.C5T09,Araip.E734B,Ara…	MF	7.9e-09	1.06211e-07	50	575
GO:0030246	carbohydrate binding	Aradu.10M4V,Aradu.1AP46,Aradu.2IP8A,Aradu.2XW42,Aradu.5P7M7,Aradu.9A5PX,Aradu.9C9ZX,Aradu.AR630,Aradu.EM8MP,Aradu.J49ED,Aradu.UMN0V,Aradu.WK040,Aradu.ZN6JM,Aradu.ZZ9EE,Araip.0B0J7,Araip.4F40M,Araip.5Z0SX,Araip.77QS1,Araip.A0CQ3,Araip.E291T,Araip.GE7ZX,Araip.HUM38,Araip.IHT4H,Araip.KTS14,Araip.PH9U4,Araip.TWW4R,Araip.UG7YL,Araip.W3RN5,Araip.Z68W8,Araip.ZPY1F	MF	1.5e-05	7.8913e-05	30	357
GO:0001871	pattern binding	Aradu.10M4V,Aradu.2IP8A,Aradu.2XW42,Aradu.J49ED,Aradu.UMN0V,Aradu.ZZ9EE,Araip.77QS1,Araip.E291T,Araip.GE7ZX,Araip.IHT4H,Araip.KTS14,Araip.TWW4R,Araip.UG7YL,Araip.Z68W8	MF	0.00025	0.00100833	14	131
GO:0004857	enzyme inhibitor activity	Aradu.98VQZ,Aradu.BMJ7K,Aradu.E721V,Aradu.GS29Q,Aradu.I8P7S,Aradu.N57TR,Aradu.SS43X,Aradu.UIP3J,Araip.31ZB6,Araip.37YKC,Araip.8P7AN,Araip.D70R3,Araip.FN71S,Araip.K5D96,Araip.QZ06Q,Araip.SS0SM,Araip.W4FSU,Araip.Y9HE8,Araip.ZTP1V	MF	0.00056	0.00199294	19	228
GO:0003700	DNA-binding transcription factor activity	Aradu.171F6,Aradu.180Q6,Aradu.1C3SG,Aradu.3R22E,Aradu.54E1H,Aradu.B1C6F,Aradu.B90GQ,Aradu.F4C71,Aradu.FIU9K,Aradu.GB4U4,Aradu.H9U8I,Aradu.I8GKQ,Aradu.I9TTZ,Aradu.JL25Y,Aradu.K41I0,Aradu.M1GCR,Aradu.MA5WH,Aradu.ME4LN,Aradu.NK24P,Aradu.RZ9Z0,Aradu.U9IPR,Aradu.V6U4I,Aradu.VL3IZ,Aradu.X3DNX,Aradu.Z3DCJ,Araip.15EJY,Araip.24AK5,Araip.30XFU,Araip.33EMF,Araip.3JJ8N,Araip.3W5AL,Araip.62IDN,Araip.761TD,Ara…	MF	0.00253	0.00746659	51	949
GO:0016020	membrane	Aradu.0GB26,Aradu.0U1AX,Aradu.1D7KB,Aradu.20H38,Aradu.237HP,Aradu.2BI4W,Aradu.34QFB,Aradu.3CD7I,Aradu.3V9TC,Aradu.46Z90,Aradu.4G0ZP,Aradu.4XL1L,Aradu.52RDN,Aradu.65SUF,Aradu.6EJ01,Aradu.6T298,Aradu.7X4NW,Aradu.86JNN,Aradu.9D9RN,Aradu.9SB6V,Aradu.A60ME,Aradu.A6XGF,Aradu.AAS86,Aradu.ALM1L,Aradu.AVH2T,Aradu.B80WC,Aradu.C1NT8,Aradu.D1CF5,Aradu.D2W96,Aradu.DDK47,Aradu.EDN8H,Aradu.EU9MI,Aradu.EZU9P,Ara…	CC	8.6e-09	1.118e-07	123	3342
GO:0031224	intrinsic component of membrane	Aradu.0GB26,Aradu.0U1AX,Aradu.1D7KB,Aradu.237HP,Aradu.2BI4W,Aradu.34QFB,Aradu.3CD7I,Aradu.3V9TC,Aradu.46Z90,Aradu.4XL1L,Aradu.52RDN,Aradu.65SUF,Aradu.6T298,Aradu.7X4NW,Aradu.A6XGF,Aradu.AVH2T,Aradu.B80WC,Aradu.C1NT8,Aradu.D1CF5,Aradu.DDK47,Aradu.EZU9P,Aradu.F9D34,Aradu.FHT7B,Aradu.FUM3Y,Aradu.FXB1F,Aradu.GW6MZ,Aradu.H2LY1,Aradu.J5X7Z,Aradu.K8VV6,Aradu.N3WAJ,Aradu.NR6Q9,Aradu.P635R,Aradu.P9K2B,Ara…	CC	1.1e-08	7.15e-08	88	2074
GO:0044425	membrane part	Aradu.0GB26,Aradu.0U1AX,Aradu.1D7KB,Aradu.237HP,Aradu.2BI4W,Aradu.34QFB,Aradu.3CD7I,Aradu.3V9TC,Aradu.46Z90,Aradu.4XL1L,Aradu.52RDN,Aradu.65SUF,Aradu.6T298,Aradu.7X4NW,Aradu.A6XGF,Aradu.AVH2T,Aradu.B80WC,Aradu.C1NT8,Aradu.D1CF5,Aradu.DDK47,Aradu.EZU9P,Aradu.F9D34,Aradu.FHT7B,Aradu.FUM3Y,Aradu.FXB1F,Aradu.GW6MZ,Aradu.H2LY1,Aradu.IC47R,Aradu.J5X7Z,Aradu.K8VV6,Aradu.N3WAJ,Aradu.NR6Q9,Aradu.P635R,Ara…	CC	1.9e-05	6.175e-05	89	2467
GO:0005576	extracellular region	Aradu.06Y10,Aradu.BMJ7K,Aradu.F3GB1,Aradu.KH5IZ,Araip.0US7S,Araip.3PF4T,Araip.B4NZS,Araip.ED5JD,Araip.J65RE,Araip.KLE6S,Araip.N88TH,Araip.Y9HE8	CC	0.00019	0.000494	12	142
