# Supplementary material for: Comparative Transcriptome Analysis Reveals Molecular Defensive Mechanism of Arachis hypogaea in Response to Salt Stress
Source: Int J Genomics. 2020 Feb 26;2020:6524093. doi: 10.1155/2020/6524093 (PMC7063224; doi:10.1155/2020/6524093)
Supplement: Supplementary 4 — Supplementary Table S4: the KEGG pathway enrichment analysis of DEGs. [file 6524093.f4.xlsx]

## Sheet: up-regulated DEGs
PathwayID	PathwayName	GenesName	S gene number	B gene number	Pvalue	FDR	PathwayLink
ko00940	Phenylpropanoid biosynthesis	Araip.696IC|Araip.2S0CJ|Araip.XM51W|Araip.L2KPV|Aradu.N5IEQ|Araip.I0093|Aradu.JL2G6|Araip.SWD4L|Araip.96G7D|Aradu.RR1FI|Araip.DER8T|Aradu.I66GQ|Aradu.1B07H|Araip.7P78Q|Araip.JSZ6P|Aradu.12T0R|Aradu.GBM3Q|Aradu.L8BYH|Araip.21F8G|Aradu.FCP6L|Araip.LW5N8|Araip.X19TV|Aradu.FYL41|Aradu.JUP0B|Aradu.ND98C|Araip.ZET1U|Araip.653SG|Aradu.8AQ1Z|Aradu.QV0LR|Aradu.70ZJ1|Aradu.Z74IT	31	517	1.09775e-12	1.72347e-10	http://www.genome.jp/kegg-bin/show_pathway?ko00940/K13066%09red/K01188%09red/K00083%09red/K11188%09red/K00430%09red/K05349%09red
ko00040	Pentose and glucuronate interconversions	Araip.C1B8C|Aradu.Y82HI|Aradu.X9QVK|Aradu.8VI8X|Aradu.J77I5|Araip.BSB2C|Aradu.JA3L7|Aradu.QCG85|Aradu.U4EKF|Araip.J70SC|Araip.L3A4T|Araip.EQ25Z|Araip.3B5EA|Araip.X2NAH|Aradu.DG6US|Araip.0Q5CU|Araip.Z2FEM|Araip.30HVE|Aradu.FBN6P|Araip.1BL7S	20	330	1.003e-08	7.87357e-07	http://www.genome.jp/kegg-bin/show_pathway?ko00040/K01213%09red/K01051%09red/K01184%09red/K01728%09red
ko00500	Starch and sucrose metabolism	Araip.C1B8C|Araip.1BL7S|Aradu.Y82HI|Aradu.U4EKF|Araip.2S0CJ|Aradu.8VI8X|Aradu.S7CZ4|Araip.EQ25Z|Araip.3B5EA|Araip.SH6Q8|Aradu.RR1FI|Araip.J70SC|Araip.L3A4T|Araip.BSB2C|Aradu.JA3L7|Aradu.DG6US|Aradu.L8BYH|Araip.21F8G|Aradu.FBN6P|Araip.QS5NG|Araip.LW5N8|Araip.28YBL|Araip.Z2FEM|Aradu.QCG85|Aradu.JUP0B|Araip.X2NAH|Aradu.7N2H0|Araip.30HVE	28	726	1.43167e-07	7.49242e-06	http://www.genome.jp/kegg-bin/show_pathway?ko00500/K01193%09red/K01184%09red/K15920%09red/K01188%09red/K01213%09red/K01051%09red/K08679%09red/K05349%09red

## Sheet: down-regulated DEGs
PathwayID	PathwayName	GenesName	S gene number	B gene number	Pvalue	FDR	PathwayLink
ko00941	Flavonoid biosynthesis	Araip.FM6GG|Araip.73H5Y|Araip.8ZH5X|Aradu.H7DF4|Araip.U7CA5|Aradu.51F84|Araip.PF5R6|Araip.IA0U9|Aradu.WV5HP|Araip.V284D|Aradu.LZ0RH|Aradu.P9QYX|Araip.E7BUX|Aradu.XB9DF|Aradu.56C76|Araip.S9JRR|Araip.9Z32Z|Araip.YDG4K|Aradu.W79GG|Aradu.537VV|Aradu.9BM9J|Araip.QL51L|Aradu.ETY3A|Araip.TTM09|Aradu.10WEW|Araip.Q8ZS3|Aradu.72KEV|Araip.H6229|Araip.CCB7P|Araip.NIV47|Araip.LS9BW|Aradu.73MTJ|Araip.3T4SK|Ara…	58	136	2.991e-36	7.26814e-34	http://www.genome.jp/kegg-bin/show_pathway?ko00941/K13065%09red/K01859%09red/K00475%09red/K00487%09red/K00660%09red
ko04712	Circadian rhythm - plant	Araip.FM6GG|Araip.73H5Y|Araip.8ZH5X|Aradu.H7DF4|Araip.U7CA5|Aradu.51F84|Araip.PF5R6|Araip.IA0U9|Aradu.WV5HP|Araip.8R33D|Aradu.LZ0RH|Aradu.P9QYX|Aradu.YUY1S|Araip.E7BUX|Aradu.XB9DF|Aradu.56C76|Araip.S9JRR|Araip.9Z32Z|Araip.YDG4K|Aradu.W79GG|Aradu.537VV|Aradu.9BM9J|Araip.QL51L|Aradu.ETY3A|Araip.TTM09|Aradu.V81ZJ|Aradu.H9IK5|Araip.TEJ1Y|Aradu.72KEV|Araip.H6229|Araip.CCB7P|Araip.LS9BW|Araip.3T4SK|Ara…	59	188	6.06297e-31	7.3665e-29	http://www.genome.jp/kegg-bin/show_pathway?ko04712/K12130%09red/K12129%09red/K12124%09red/K12116%09red/K00660%09red
ko00592	alpha-Linolenic acid metabolism	Aradu.6DM63|Aradu.1M29V|Araip.S2HQW|Aradu.12ETV|Aradu.H0G14|Araip.DQ4L8|Aradu.AS232|Aradu.65WG6|Araip.MN7KE|Araip.I4CFI|Araip.TT0ZZ|Aradu.8D3SW|Aradu.6Z465|Araip.MDH6Q|Aradu.5ZC0V|Araip.HGI2J|Aradu.WK4VE|Araip.V48DY|Aradu.4RE2S|Araip.17941|Aradu.U3FFW|Araip.S5AVW|Araip.J5GRU|Araip.RGB10|Araip.W689W|Aradu.HF3LG|Araip.LN188|Aradu.FXS1X|Araip.849ER|Araip.673NH	30	164	3.32329e-11	2.69187e-09	http://www.genome.jp/kegg-bin/show_pathway?ko00592/K05894%09red/K08241%09red/K00232%09red/K00454%09red/K10526%09red/K10525%09red/K07513%09red
ko00902	Monoterpenoid biosynthesis	Araip.LM2JS|Aradu.2X47D|Araip.2FA6F|Aradu.C881Z|Araip.EQK69|Araip.UBP04|Araip.Q2FTQ|Aradu.2QN43|Aradu.EF5K9|Araip.C8YA7|Araip.VHP9R|Araip.ICV3K|Araip.ARQ95|Araip.VF47N|Aradu.46T7Q	15	39	6.5392e-10	2.27004e-08	http://www.genome.jp/kegg-bin/show_pathway?ko00902/K15086%09red/K15095%09red
ko00360	Phenylalanine metabolism	Araip.C95X7|Aradu.IEK57|Araip.V9S7Z|Aradu.GLM5E|Araip.GM19P|Araip.09SYZ|Aradu.10WEW|Aradu.755IM|Aradu.73MTJ|Araip.69J63|Araip.WGE5V|Araip.HIL9C|Aradu.149WS|Aradu.IU1HH|Araip.PJ0JZ|Araip.Q25ER|Aradu.Z6RV7|Aradu.158JQ|Aradu.M24I8|Araip.B8VKR|Araip.2U0RL|Aradu.WYR1J	22	136	9.30687e-08	2.31189e-06	http://www.genome.jp/kegg-bin/show_pathway?ko00360/K10775%09red/K01426%09red/K15849%09red/K00815%09red/K00457%09red/K00487%09red/K01904%09red
ko00940	Phenylpropanoid biosynthesis	Aradu.5YU3Q|Aradu.MX9DT|Aradu.GP6IB|Aradu.UD5NS|Araip.C95X7|Araip.N79SI|Aradu.T0DLI|Araip.V9S7Z|Araip.MM1BS|Araip.GM19P|Araip.7P6A7|Aradu.52Q7K|Araip.007DT|Araip.71E8A|Araip.09SYZ|Aradu.DF39S|Araip.7I0KV|Aradu.10WEW|Aradu.IV2GP|Araip.IUY1V|Araip.T9LT0|Aradu.XEA0F|Araip.8G26U|Aradu.BP38Y|Aradu.73MTJ|Araip.69J63|Araip.963UT|Araip.C6C0T|Aradu.ZW0FL|Araip.Z3XZX|Aradu.1X6G8|Aradu.IU1HH|Araip.PJ0JZ|Ara…	48	517	9.51395e-08	2.31189e-06	http://www.genome.jp/kegg-bin/show_pathway?ko00940/K13065%09red/K10775%09red/K13066%09red/K01188%09red/K00083%09red/K12355%09red/K12356%09red/K05350%09red/K01904%09red/K09755%09red/K00430%09red/K00487%09red/K09756%09red
ko00591	Linoleic acid metabolism	Araip.HGI2J|Araip.Q8LFT|Aradu.FM0YX|Araip.LB22X|Aradu.TJL9X|Araip.GV48H|Aradu.G99LQ|Aradu.8D3SW|Araip.K56RN|Aradu.951UC|Aradu.AS232|Araip.849ER|Araip.W6TLM|Araip.MN7KE	14	58	3.23377e-07	7.1437e-06	http://www.genome.jp/kegg-bin/show_pathway?ko00591/K00454%09red/K15718%09red
ko00480	Glutathione metabolism	Araip.5F7F4|Araip.Y9MKL|Araip.84ZIK|Araip.WJS9Q|Araip.25PWM|Aradu.CNF9F|Aradu.3602N|Aradu.1232H|Araip.5HK6K|Aradu.Q2835|Araip.J9Q6I|Araip.MHA7X|Aradu.1H68Z|Aradu.45WUM|Araip.R2FTY|Aradu.D1CQS|Aradu.D7LWC|Aradu.ZPP4Z|Araip.88ZTU|Araip.P3ATM|Araip.0BL53|Aradu.WGD8V|Araip.J18II|Aradu.73PA3|Aradu.UL23E|Araip.XA49Z|Aradu.T56CX|Aradu.UCD4A|Araip.73AZP|Araip.3BP83	30	270	8.86332e-07	1.79482e-05	http://www.genome.jp/kegg-bin/show_pathway?ko00480/K00681%09red/K01919%09red/K00799%09red
ko00280	Valine, leucine and isoleucine degradation	Aradu.6DM63|Araip.AE7H5|Araip.BD6X3|Araip.FB68F|Aradu.ZIF6R|Aradu.HF3LG|Araip.7EF18|Araip.06C6M|Araip.LN188|Aradu.D6YSS|Aradu.6Z465|Araip.TV4R3|Araip.DQ8EI|Araip.MDH6Q|Aradu.34L9V|Aradu.RWW7R|Aradu.8BQ4V|Aradu.FQ1XF|Araip.C6G0D|Aradu.348PZ|Aradu.VX1BY	21	168	7.40596e-06	0.000138434	http://www.genome.jp/kegg-bin/show_pathway?ko00280/K05605%09red/K00166%09red/K00128%09red/K00826%09red/K00253%09red/K01640%09red/K07513%09red/K00020%09red
ko00130	Ubiquinone and other terpenoid-quinone biosynthesis	Araip.C95X7|Araip.P8QST|Aradu.WYR1J|Aradu.D1CF5|Araip.09SYZ|Aradu.A6XGF|Aradu.10WEW|Araip.S1VT2|Aradu.73MTJ|Araip.WGE5V|Aradu.J5X7Z|Aradu.4XL1L|Araip.JAK31|Araip.PJ0JZ|Araip.Q25ER|Aradu.Z6RV7|Aradu.M24I8|Aradu.IEK57|Araip.76U5P|Araip.ZTF4L|Araip.UK95H|Araip.2U0RL	22	198	2.42212e-05	0.00042041	http://www.genome.jp/kegg-bin/show_pathway?ko00130/K03809%09red/K00815%09red/K09833%09red/K00457%09red/K00487%09red/K01904%09red
ko00904	Diterpenoid biosynthesis	Aradu.1UI8P|Araip.KVM2C|Araip.SGA37|Aradu.D1QW8|Aradu.FF0QL|Araip.8X7VT|Araip.9603U|Aradu.7SN56|Aradu.Q0ZWM|Aradu.GMU6R|Araip.1Y1N6|Araip.IJN8L	12	80	0.000142959	0.00225671	http://www.genome.jp/kegg-bin/show_pathway?ko00904/K04124%09red/K04125%09red/K17961%09red/K04123%09red
ko00910	Nitrogen metabolism	Aradu.AAT7R|Araip.4F18W|Aradu.K4APN|Aradu.U7APW|Araip.NT0XC|Aradu.60DAC|Aradu.12EER|Araip.K173U|Araip.N1PSJ|Araip.I13PT|Araip.B7Z6E|Aradu.Z1QPK	12	88	0.000316162	0.00426819	http://www.genome.jp/kegg-bin/show_pathway?ko00910/K01673%09red/K00284%09red/K00261%09red/K01455%09red/K01674%09red
ko00430	Taurine and hypotaurine metabolism	Aradu.46DEV|Araip.7JJ4U|Araip.WJS9Q|Aradu.J0RCG|Araip.ZQ6LW|Araip.V6S4N|Aradu.UL23E	7	40	0.00157344	0.0201235	http://www.genome.jp/kegg-bin/show_pathway?ko00430/K00681%09red/K10712%09red/K01580%09red
ko00052	Galactose metabolism	Aradu.NB8XZ|Araip.XJD82|Aradu.ZK8VV|Araip.KLH8I|Aradu.EQ3HU|Araip.371ZH|Aradu.XK367|Aradu.27C7S|Araip.EW2ZU|Aradu.3PC6T|Araip.JS4CC|Aradu.P39C1|Araip.NEM14|Aradu.K6F4E|Aradu.SS76M|Araip.L3NWH|Araip.WK203	17	189	0.00172902	0.0210076	http://www.genome.jp/kegg-bin/show_pathway?ko00052/K00850%09red/K06617%09red/K18819%09red/K06611%09red/K01193%09red
ko00270	Cysteine and methionine metabolism	Aradu.348PZ|Aradu.FQ1XF|Araip.P6KBN|Aradu.Z94KU|Araip.DQ8EI|Aradu.ILB9Z|Aradu.IEK57|Araip.WGE5V|Araip.RMU5T|Aradu.62W74|Aradu.3L0G1|Araip.47TK7|Aradu.B8GCY|Araip.E9KTC|Araip.H1TPN|Araip.73AZP|Araip.L9VPS|Araip.IA30F|Araip.24S3M|Aradu.W0BBS|Araip.IA7FD	21	264	0.00220603	0.0255269	http://www.genome.jp/kegg-bin/show_pathway?ko00270/K01919%09red/K00826%09red/K05933%09red/K01611%09red/K00815%09red/K01761%09red/K13034%09red/K01762%09red
ko00960	Tropane, piperidine and pyridine alkaloid biosynthesis	Aradu.158JQ|Aradu.IEK57|Aradu.S0XYN|Araip.WGE5V|Araip.HIL9C|Aradu.GF4WK|Aradu.149WS|Araip.AG2WX|Aradu.GLM5E	9	70	0.00248197	0.0274145	http://www.genome.jp/kegg-bin/show_pathway?ko00960/K15849%09red/K00815%09red/K08081%09red
ko00460	Cyanoamino acid metabolism	Aradu.5YU3Q|Aradu.WX5TB|Araip.IA30F|Araip.8G26U|Aradu.BP38Y|Aradu.U7APW|Araip.WJS9Q|Aradu.JZ8MY|Aradu.P2LEZ|Araip.C6C0T|Araip.N74EU|Aradu.2V34U|Aradu.3TT1Y|Araip.B0BC2|Araip.GEY51|Aradu.UL23E|Aradu.W0BBS	17	200	0.00298156	0.0315008	http://www.genome.jp/kegg-bin/show_pathway?ko00460/K12153%09red/K01188%09red/K00600%09red/K05350%09red/K00681%09red/K01455%09red/K13034%09red
ko01040	Biosynthesis of unsaturated fatty acids	Aradu.6DM63|Araip.YL8HA|Araip.W689W|Aradu.42SWI|Aradu.HF3LG|Araip.LN188|Aradu.6Z465|Aradu.FXS1X|Araip.MDH6Q|Araip.31Q5V	10	89	0.00357868	0.0362341	http://www.genome.jp/kegg-bin/show_pathway?ko01040/K00232%09red/K07513%09red/K01068%09red/K00507%09red
ko00380	Tryptophan metabolism	Aradu.755IM|Araip.BD6X3|Aradu.ZIF6R|Araip.MQU8W|Araip.7EF18|Araip.B8VKR|Araip.ZHD9F|Aradu.D12DR|Aradu.8BQ4V|Araip.VSP1L|Aradu.Z5LJB|Araip.RQP5I	12	125	0.00485688	0.0472089	http://www.genome.jp/kegg-bin/show_pathway?ko00380/K00128%09red/K11816%09red/K01426%09red/K00164%09red
