# Supplementary material for: Comparative Transcriptome Analysis Reveals Molecular Defensive Mechanism of Arachis hypogaea in Response to Salt Stress
Source: Int J Genomics. 2020 Feb 26;2020:6524093. doi: 10.1155/2020/6524093 (PMC7063224; doi:10.1155/2020/6524093)
Supplement: Supplementary 5 — Supplementary Table S5: the qRT-PCR primers of selected genes. [file 6524093.f5.xlsx]

## Sheet: PCR primers
index	Gene ID	Description	Forward primer	Reverse primer
1	Actin	Arachis hypogaea actin-depolymerizing factor 2-like	GAGGAGAAGCAGAAGCAAGTTG	AGACAGCATATCGGCACTCATC
2	Araip.HWV62	Cytochrome P450 superfamily protein	TTACCATTATTATCTGCTACC	TGTTCCTTCACTTACCTA
3	Aradu.SC9VF	Chaperone DnaJ-domain superfamily protein	AACTTATGGACACAAGGT	GATTGGTATGTTGCTGAC
4	Aradu.DW9XI	MYB transcription factor MYB48	GGTATGAATCGGTTATGTC	GTTCTATGTTGCTGCTATT
5	Araip.SC297	WRKY family transcription factor family protein	GCATCTTCTTCTTCTTCTTC	GACTTCATCATCCATTCTTG
6	Araip.8Z4K7	GRF zinc finger protein	CGGAGGAGGAATATCAAG	GGAACAACCTATCTGGATT
7	Araip.BIW25	PATATIN-like protein 4	AGTATGTCATCCGTTCAGA	CACCTCCATCAATGCTAAG
8	Araip.5J271	Chitinase family protein	GGTAACACTTCGGAGATGA	TATCACCAGGAGCAACAC
9	Araip.CBB5Z	thioredoxin-dependent peroxidase 1	ATTGTTTGTTGAGTTTGGA	TTCGTTAGGTCAGAGATG
10	Araip.2L1FF	FAR1 DNA-binding domain protein	ATTGTCGTGAATATGGTTAC	CTATGGCATCTCCTTCTC
11	Aradu.R70ZF	transcription factor bHLH35-like	TTGCCTATGGTGACAGTA	CTTCAAGAACGGTGAGAC
12	Aradu.8H8GJ	Pentatricopeptide repeat (PPR) superfamily protein	GGAAGGCGTCAACAAGAA	GAGCACAAGCACATTCAAG
13	Aradu.F32WE	MLP-like protein 43	CGATGAAGAGAAGAAGTTGA	AAGTAGCCGTATGGAGTT
14	Aradu.5K7BE	purple acid phosphatase 17	CACGATTATTGTTGTTATTAGC	ACTTCAGATTGGTTATATTCAC
15	Araip.ILM6Q	histone deacetylase 9	GAACTGATATAACTGTATTGAC	CACACTGGAGAACTATTG
